# Supplementary material for: Single-Walled vs. Multi-Walled Carbon Nanotubes: Influence of Physico-Chemical Properties on Toxicogenomics Responses in Mouse Lungs
Source: Nanomaterials (Basel). 2023 Mar 15;13(6):1059. doi: 10.3390/nano13061059 (PMC10057402; doi:10.3390/nano13061059)
Supplement: Supplementary file 1 [file nanomaterials-13-01059-s001.zip]

Archive with 13 entries (13 files):
- nanomaterials-2267591-supplementary.pdf
- Table S1.xlsx
- Table S10.xlsx
- Table S11.xlsx
- Table S12.xlsx
- Table S2.xlsx
- Table S3.xlsx
- Table S4.xlsx
- Table S5.xlsx
- Table S6.xlsx
- Table S7.xlsx
- Table S8.xlsx
- Table S9.xlsx
