# Supplementary material for: Single-Walled vs. Multi-Walled Carbon Nanotubes: Influence of Physico-Chemical Properties on Toxicogenomics Responses in Mouse Lungs
Source: Nanomaterials (Basel). 2023 Mar 15;13(6):1059. doi: 10.3390/nano13061059 (PMC10057402; doi:10.3390/nano13061059)
Supplement: Supplementary file 1 [file nanomaterials-13-01059-s001.zip › Table S1.xlsx]

## Sheet: Table S1
Table S1. Physico-chemical properties of CNTs provided by the manufacturer.
Group	ID	Type	Purity	Length	Diameter
			C (%w/w)	(nm)	(nm)
SWCNTs	NM-411	Pristine	90	~1,000	2
	NRCWE-055	Pristine	90	1,000-3,000	1-2
	NRCWE-056	-OH	90	1,000-3,000	1-2
	NRCWE-057	-COOH	90	1,000-3,000	1-2
	NRCWE-051	Pristine	95	5,000-30,000	1-2
	NRCWE-052	Pristine	90	5,000-30,000	1-2
	NRCWE-053	-OH	90	5,000-30,000	1-2
	NRCWE-054	-COOH	90	5,000-30,000	1-2
MWCNTs	NRCWE-061	-NH2	>95	>50,000	8-15
	NRCWE-062	Pristine	>95	10,000-30,000	<8
	NRCWE-063	-OH	>95	10,000-30,000	<8
	NRCWE-064	-COOH	>95	10,000-30,000	<8
NM-411 Available in the European Commission's Joint Research Center nanomaterial repository. Their characteristics are reported in the public EUFP7 NANoREG database: https://search.data.enanomapper.net/.
