# Supplementary material for: Single-Walled vs. Multi-Walled Carbon Nanotubes: Influence of Physico-Chemical Properties on Toxicogenomics Responses in Mouse Lungs
Source: Nanomaterials (Basel). 2023 Mar 15;13(6):1059. doi: 10.3390/nano13061059 (PMC10057402; doi:10.3390/nano13061059)
Supplement: Supplementary file 1 [file nanomaterials-13-01059-s001.zip › Table S2.xlsx]

## Sheet: Table S2
Table S2. Total of studies used in the WGCNA.
Accession	Exposure	Route	Strain	Platform	Pubmed ID	Reference
GSE87691	benzo(a)pyrene (BaP), chrysene (CHR), benz(a)anthracene (BaA), benzo(b)fluoranthene (BbF), benzo(ghi)perylene (BghiP), benzo(k)fluoranthene (BkF), dibenz(ah)anthracene (DBahA), and indeno(123,cd)pyrene (IP)	oral gavage	MutaTMMouse	Agilent Microarray	27858113	[25]
GSE87690	Coal Tar	oral gavage	MutaTMMouse	Agilent Microarray	27858113	[25]
GSE8790	Cigarette Smoke	inhalation	A/J mice	Affymetrix Microarray	19286929	[26]
GSE52509	Cigarette Smoke	inhalation	C57BL/6N	Illumina beadchip	25128521	[27]
GSE20174	Stainless Steel and Mild Steel Welding Fume	inhalation	A/J mice	Illumina beadchip	20525249	[28]
GSE76205	Cigarette Smoke	inhalation	C57BL/6	Illumina HiSeq 2000	28575117	[29]
GSE18344	Cigarette Smoke	inhalation	CD-1, CD-1_Nrf2 -/-,	Affymetrix Microarray	20133372	[30]
GSE55127	Cigarette Smoke	inhalation	BALB/c	Agilent Microarray	24663285	[31]
E-MTAB-3150	Cigarette Smoke	inhalation	C57BL/6	Affymetrix Microarray	26731301	[32]
GSE22357	Diesel Exhaust	inhalation	BALB/c	Affymetrix Microarray	27458330	[33]
GSE9383	Diesel Exhaust	inhalation	BALB/c	Affymetrix Microarray	18192680	[34]
GSE68522	Ozone	inhalation	Mbl(+/+), Mbl(-/-)	Agilent Microarray	27106289	[35]
GSE25095	Ozone	inhalation	C57, B6.IL10	Affymetrix Microarray	20826374	[36]
GSE20715	Ozone	inhalation	C3H/HeOuJ	Affymetrix Microarray	21543283; 34573120	[37,38]
GSE41698	Particulate Matter	inhalation	C57BL/6 × CBA F1 hybrid	Agilent Microarray	23536514	[39]
GSE9465	Particulate Matter	inhalation	A/J mice	Affymetrix Microarray	19057703	[40]
GSE17478	Particulate Matter	inhalation	CD-1	Affymetrix Microarray	22108299	[41]
GSE40151	Bleomycin	intratracheally sprayed	C57BL6/J	Affymetrix Microarray	23565148	[42]
GSE8553	Bleomycin	inhalation	C57/BL6	Agilent Microarray	18553078	[43]
GSE132869	Bleomycin	subcutaneous injections	C57BL/6	Illumina HiSeq 2500	34289031	[44]
GSE34814	Bleomycin	instillation	C57BL	Agilent Microarray	23459460	[45]
GSE41789	Radiation	x-ray	C57Bl/Ncr	Affymetrix Microarray	24052614	[46]
GSE20959	Radiation	x-ray	C3H/He Slc, C57BL/6J Jms Slc, A/J Jms Slc	Agilent Microarray	22541960	[47]
GSE94852	Radiation	x-ray	C57BL/6J	Illumina HiSeq 2500	28534660	[48]
GSE85359	Radiation	x-ray	C57	Affymetrix Microarray	28130353	[49]
GSE104214	LPS	intranasal	C57BL/6, bpifa1(-/-)	Agilent Microarray	30461288	[50]
GSE14675	LPS	i.p. injection	C57/B6, C57 tlr4(-/-), A/HeJ, AKR/J, 129/SvIm, FVB/NJ, BALB/cJ, C3H/HeJ, DBA/2J, NZW/LacJ, LP/J	Agilent Microarray	21131441	[51]
GSE65871	Toll-like receptor 4 agonist	aerosolized	C57BL6, Myd88 (-/-), TRIF(-/-)	Agilent Microarray	26510639	[52]
GSE3414	Nippostrongylus brasiliensis	infected subcutaneously	SCID	Affymetrix Microarray	16926388	[53]
GSE5555	Nippostrongylus brasiliensis	infected subcutaneously	BALB/c	Affymetrix Microarray	18505812	[54]
GSE41665	Ovalbumin antigen (OVA)	OVA-sensitized	naïve mice	Affymetrix Microarray	35625754	[55]
GSE122197	CuO nanomaterials	intraperitoneally	BALB/c	Agilent Microarray	31277695	[56]
GSE41667	Thymic stromal lymphopoietin		naïve and OVA-sensitized mice	Affymetrix Microarray
GSE81570	Titanium dioxide nanomaterials	intratracheal instillation	C57BL/6	Agilent Microarray	27760801	[57]
GSE124041	Carbon nanotubes	intratracheal instillation	C57BL/6	Agilent Microarray		[58]
GSE35284	Carbon nanotubes	intratracheal instillation	C57BL/6	Agilent Microarray	25554681	[10]
GSE47000	Carbon nanotubes	intratracheal instillation	C57BL/6	Agilent Microarray	24260392	[59]
GSE50176	Rod-like carbon nanotubes	inhalation	C57BL/6	Agilent Microarray	25318534	[60]
GSE29042	Carbon nanotubes	pharyngeal aspiration	C57BL/6J	Agilent Microarray	22891886	[61]
GSE37891	Carbon black nanoparticle	intratracheal instillation	C57BL/6	Agilent Microarray	24078381	[62]
GSE68036	Carbon black nanoparticle	intratracheal instillation	C57BL/6	Agilent Microarray	26551751	[63]
GSE29762	Carbon black nanoparticle	intratracheal instillation	C57BL/6	Agilent Microarray	22001195	[64]
GSE111155	Ozone	inhalation	C57BL/6, Balb/c, SP-D (-/-) mice	Affymetrix Microarray	29733456	[65]
