# Supplementary material for: Single-Walled vs. Multi-Walled Carbon Nanotubes: Influence of Physico-Chemical Properties on Toxicogenomics Responses in Mouse Lungs
Source: Nanomaterials (Basel). 2023 Mar 15;13(6):1059. doi: 10.3390/nano13061059 (PMC10057402; doi:10.3390/nano13061059)
Supplement: Supplementary file 1 [file nanomaterials-13-01059-s001.zip › Table S3.xlsx]

## Sheet: Table S3
Table S3. Pulmonary diseases identified from public microarray datasets (X-axis, Figure 12). Data previously published in Rahman et al. 2020 [14], Williams and Halappanavar et al. 2015 [67].
Lung disease models		GEO accession number	Reference
Bacterial infection (LPS)	Bacterial infection induced by lipopolysaccharides	GSE4231	[70]
Th2 response (OVA allergy)	Th2 response by ovalbumin allergy	GSE4231	[70]
Th2 response (Aspergillus Fumigatus)	Th2 response induced by Aspergillus Fumigatus	GSE4231	[70]
Bleomycin injury	Bleomycin-induced lung injury	GSE4231	[70]
Th2 response (IL13)	Th2 response in Transgenic mice expressing IL-13	GSE4231	[70]
M. pulmonis	Mycoplasma pulmonis	GSE4231	[70]
M. Tuberculosis	Mycobacterium tuberculosis	GSE4231	[70]
N. Brasiliensis	Nippostrongylus brasiliensis	GSE4231	[70]
P. Aeruginosa	Pseudomonas aeruginosa	GSE4231	[70]
Emphysema TNF	Emphysema. Wildtype and TNF-α overexpressing mice	GSE11037	[71]
Carcinoma (LC2KO)	Model of human small cell lung carcinoma-Double knockout Rb/p53	GSE18534	[72]
Carcinoma (LC3KO)	Model of human small cell lung carcinoma-Triple knockout Rb/p53/p130	GSE18534	[72]
COPD (LR.CC)	Chronic obstructive pulmonary disease model in CC-LR mice (a clara cell-targeted K-ras mutant mouse model of lung cancer)	GSE19605	[73]
COPD (WT)	Chronic obstructive pulmonary disease model in wild-type mice	GSE19605	[73]
Asthma	Model of asthma	GSE6858	[74]
Tumor	Spontaneous lung tumors	GSE31013	[75]
Cancer (0.2 Gy)	Lung cancer induced by radiation	GSE42233	[76]
Cancer (1.0 Gy)	Lung cancer induced by radiation	GSE42233	[76]
Carc. (NAPD)	Carcinogen 1,5-Napthalenediamine	GSE6116	[77]
Carc. (NEDD)	Carcinogen N-(1-naphthyl)ethylenediamine dihydrochloride	GSE6116	[77]
Chem. (PCNB)	Carcinogen Pentachloronitrobenzene	GSE6116	[77]
Carc. (BBMP)	Carcinogen 2,2-Bis(bromomethyl)-1,3-propanediol	GSE6116	[77]
Chem. (DIAZ)	Chemical Diazinon	GSE6116	[77]
Chem. (MALA)	Chemical Malathion	GSE6116	[77]
Chem. (NAAC)	Chemical 4-Nitroanthranilic acid	GSE6116	[77]
Carc. (BFUR)	Carcinogen 2,3-Benzofuran	GSE6116	[77]
Carc. (BENZ)	Carcinogen Benzene	GSE6116	[77]
Chem. (CMPH)	Chemical 2-Chloromethylpyridine hydrochloride	GSE6116	[77]
Carc. (COUM)	Carinogen Coumarin	GSE6116	[77]
Carc. (DBET)	Carcinogen 1,2-Dibromoethane	GSE6116	[77]
Carc (MACR)	Carcinogen N-Methylolacrylamide	GSE6116	[77]
Emphysema (1.5 month, 5h, 6 months, 8 days)	Emphysema induced by cigarette smoke	GSE8790	[26]
COPD (4 months and 6 months)	Chronic obstructive pulmonary disease	GSE52509	[27]
Inflammation phase PF	Inflammation phase pulmonary fibrosis induced by bleomycin	GSE40151	[42]
Activate PF	Active pulmonary fibrosis induced by bleomycin	GSE40151	[42]
Late phase PF	Late phase pulmonary fibrosis induced by bleomycin	GSE40151	[42]
PF (WT)	Pulmonary fibrosis induced by bleomycin in Wild type mice	GSE25640	[78]
PF (KO)	Pulmonary fibrosis induced by bleomycin in FIZZZ2 Knockout mice	GSE25640	[78]
