# Supplementary material for: Single-Walled vs. Multi-Walled Carbon Nanotubes: Influence of Physico-Chemical Properties on Toxicogenomics Responses in Mouse Lungs
Source: Nanomaterials (Basel). 2023 Mar 15;13(6):1059. doi: 10.3390/nano13061059 (PMC10057402; doi:10.3390/nano13061059)
Supplement: Supplementary file 1 [file nanomaterials-13-01059-s001.zip › Table S4.xlsx]

## Sheet: a.NM411
Table S4. Upregulated and downregulated genes in mouse lung tissue after 1 day of exposure to NM-411, NRCWE-055, NRCWE-056, and NRCWE-057.
Table S4a. Upregulated and downregulated genes in mouse lung tissue after exposure to NM-411. FDR adjusted p-value ≤ 0.05 and fold change ≤ −1.5 or ≥ 1.5.
		Low dose (6 µg/mouse)		Medium dose (18 µg/mouse)		High dose (54 µg/mouse)
Agilent ID	Gene Symbol	FDR adj p-value	Fold Change	FDR adj p-value	Fold Change	FDR adj p-value	Fold Change
A_55_P2175486	1700001F09Rik (Includes Others)			0	1.876
A_55_P2137049	C15orf48					0.0295	6.295
A_51_P114462	Ccl17					0	5.402
A_55_P1961335	Ctsk	0	1.721	0	1.878	0	2.073
A_55_P1990032	Cxcl6					0	8.981
A_55_P2164534	Dtl					0.0497	1.764
A_55_P2011937	Fignl1					0.0295	1.688
A_51_P315904	Gadd45g					0.0295	1.595
A_55_P1960735	Gdf15			0	1.634
A_51_P438967	Gpnmb	0	1.723	0.0377	1.689
A_55_P1997756	Il6					0.0295	2.384
A_55_P2077055	Itih4					0	1.986
A_55_P2003414	Kng1					0.0497	2.306
A_55_P2070869	Lcn2			0	1.98	0	2.913
A_55_P2087118	Ly6a (Includes Others)					0	4.28
A_55_P2090060	Mab21l3					0	1.559
A_55_P2063626	Matk					0.0295	1.825
A_51_P158210	Mcm2					0	1.594
A_55_P2111907	Noxo1					0	3.048
A_55_P2053491	Pdia6					0	1.546
A_51_P148684	Pou6f2			0	1.822
A_51_P260683	Rgs1					0	2.009
A_52_P318673	Saa1					0.0497	3.658
A_55_P2142232	Serpina3g (Includes Others)					0	1.802
A_55_P1993933	Serpinb1c					0.0295	9.886
A_51_P224164	Slc26a4			0	5.543	0	9.745
A_51_P459944	Tcf21					0.0295	-1.52
A_55_P2082180	Tnfrsf9					0.0295	2.578
A_55_P2197338	Tnfsf13os					0	1.576
A_55_P2156425	Upk1a					0.0497	-1.728
A_55_P1995768	Znf442	0	-1.549

## Sheet: b.NRCWE-055
Table S4. Upregulated and downregulated genes in mouse lung tissue after 1 day of exposure to NM-411, NRCWE-055, NRCWE-056, and NRCWE-057.
Table S4b. Upregulated and downregulated genes in mouse lung tissue after exposure to NRCWE-055. FDR adjusted p-value ≤ 0.05 and fold change ≤ −1.5 or ≥ 1.5.
		Low dose (6 µg/mouse)		Medium dose (18 µg/mouse)		High dose (54 µg/mouse)
Agilent ID	Gene Symbol	FDR adj p-value	Fold Change	FDR adj p-value	Fold Change	FDR adj p-value	Fold Change
A_51_P502872	2200002D01Rik					0	1.709
A_52_P665675	Abca1					0	-1.858
A_55_P2102769	Abca8a					0	-1.706
A_66_P101519	Abcc9					0.0105	-1.664
A_51_P222467	Abcg1					0.0171	-1.594
A_55_P2019054	Acacb					0.0384	-1.678
A_51_P123625	Acod1					0	2.95
A_55_P2340448	Acss3					0.00994	-1.547
A_52_P420504	Acta2					0.00139	1.827
A_55_P2083694	Adam33					0.00249	-1.527
A_52_P671784	Adamts10					0.0111	-1.502
A_55_P1955778	Adamts4					0	2.226
A_55_P2109382	Adora2a					0.00347	1.593
A_55_P1972605	Adora3					0	2.041
A_55_P1992849	Adrb3					0.00736	-1.953
A_51_P510764	Agmo					0.00249	-1.516
A_51_P400543	Aif1					0.00665	1.546
A_51_P334942	Aldh1a1					0.0215	-1.563
A_52_P87843	Aldh1a3					0	3.15
A_51_P338485	Aldh6a1					0	-1.775
A_51_P494125	Alpl					0	1.72
A_55_P1983418	Amy2a					0.0111	-2.301
A_55_P2139402	Amy2b					0.00515	-1.725
A_52_P16752	Aox3					0	-1.558
A_51_P125205	Aqp1					0	-1.562
A_51_P303160	Arg1					0	4.922
A_52_P374897	Arg2					0.00665	1.66
A_55_P2027812	Arxes1/Arxes2					0	-1.51
A_55_P2003824	Asgr1					0.0304	-1.732
A_52_P227267	Atp1a2					0.00249	-1.992
A_66_P124179	Atp6v0d2					0.0117	1.63
A_55_P2347756	Au040972					0.0251	2.208
A_55_P2110758	B430306N03Rik					0	1.77
A_51_P419286	Batf3					0.00433	1.738
A_55_P1971599	Bcan					0	-2.673
A_66_P105175	Bche					0.0117	-1.546
A_52_P299771	Bcl2a1c					0.00347	1.742
A_51_P237668	Bex1					0.00515	-1.592
A_55_P1967683	Bex4					0.0155	-1.536
A_52_P340669	Bhlha15			0.0419	2.046	0	2.29
A_51_P272553	Bhlhe40	0	1.589	0	1.596	0	1.526
A_51_P488196	Bmper					0	1.571
A_55_P2091473	Bnip3					0	-1.614
A_55_P2124941	Brinp1					0.0117	1.544
A_52_P131836	Bysl					0	1.502
A_55_P2137049	C15orf48					0	8.494
A_51_P110301	C3					0.00139	2.71
A_55_P2156855	Ca13					0	1.727
A_51_P416419	Calr					0	1.605
A_66_P104365	Ccdc167					0	1.84
A_51_P114462	Ccl17			0.0419	4.626	0	5.693
A_51_P286737	Ccl2					0	4.062
A_51_P140710	Ccl3l3					0	1.914
A_51_P509573	Ccl4					0	3.151
A_51_P436652	Ccl7					0	8.289
A_51_P464703	Ccl8					0	5.205
A_51_P185660	Ccl9					0	2.636
A_51_P245989	Ccr2					0.0228	1.547
A_52_P578732	Ccr5					0.0171	1.701
A_51_P172853	Cd14					0	2.337
A_55_P1960376	Cd209					0.0181	1.955
A_55_P2000224	Cd63					0	1.512
A_55_P1961943	Cd68					0.00249	1.519
A_52_P469502	Cda					0	1.524
A_51_P133612	Cdt1					0	1.505
A_52_P168567	Cebpa					0.00139	-1.584
A_55_P2165839	Cebpe					0.00929	2.381
A_55_P2325663	Cers3					0	1.586
A_51_P369784	Ces1e					0.00515	-1.534
A_51_P178772	Ces1f					0.0437	-1.945
A_51_P413866	Cfb					0	1.836
A_55_P2085181	Chaf1b					0	1.642
A_55_P2175469	Chd2					0	-1.587
A_55_P1978371	Chd5					0.00139	-1.587
A_52_P56636	Chia	0.0401	2.114
A_52_P441294	Chl1					0.0155	2.156
A_55_P2137010	Chrna7					0.0139	1.655
A_55_P2120354	Cib2					0.008	-1.536
A_51_P227004	Cks1b					0.00139	1.502
A_51_P246653	Clec7a					0	1.948
A_55_P2142028	Clip4					0	1.991
A_55_P2067608	Clmp					0	1.778
A_51_P174275	Colec11					0.00139	-1.533
A_55_P2043337	Colq					0.0268	-1.585
A_55_P2151071	Cox7a2l					0	-1.505
A_55_P2111302	Cp					0.00139	2.618
A_55_P2025038	Cpe					0.0304	-1.745
A_51_P124345	Cpne5					0.00866	-1.557
A_51_P139108	Cpxm1					0.00433	1.943
A_55_P2319468	Creb5					0	1.77
A_52_P541270	Crebl2					0	-1.795
A_51_P171075	Csf2					0	1.939
A_51_P146753	Csf2rb					0	1.69
A_55_P2038106	Cst8					0	-2.112
A_51_P114910	Cstb					0	1.545
A_51_P251357	Ctps1					0	1.947
A_52_P195839	Ctsc					0	1.641
A_52_P660945	Ctsf					0	-1.787
A_55_P1961335	Ctsk	0	1.836	0	2.046	0	2.239
A_51_P212308	Cxadr					0.00139	1.578
A_55_P2016462	Cxcl10					0	6.027
A_55_P1966204	Cxcl12					0	2.757
A_52_P232813	Cxcl3					0	2.617
A_55_P1990032	Cxcl6			0	7.98	0	17.172
A_55_P2103249	Cxcr1	0.0401	1.949			0.00139	1.91
A_51_P461429	Cyp7b1					0	2.73
A_55_P2216976	D13Ertd608E					0.00139	1.688
A_55_P2032079	Dbp	0	2.506
A_55_P2148748	Dclk1					0.00139	1.524
A_51_P334104	Dcn					0.0145	-2.063
A_55_P2161545	Ddx21					0	1.548
A_52_P223809	Dhx58					0.00249	1.624
A_55_P2200029	Dleu2					0	-1.767
A_55_P2133405	Dmkn					0.00433	1.989
A_51_P188073	Dnajb11					0	1.5
A_51_P496720	Dnmt3l					0	1.616
A_51_P446469	Dok2					0.00139	1.772
A_51_P116651	Dpt					0	-1.576
A_51_P473259	Dpyd					0	-2.021
A_55_P2101757	Dscc1					0	1.523
A_55_P2164534	Dtl					0	1.806
A_55_P2302577	Dyrk1B					0	-1.644
A_55_P2004375	Ear2 (Includes Others)					0	2.064
A_51_P160544	Efemp2					0	1.549
A_51_P239984	Exo1					0.00515	1.587
A_51_P174961	F10					0	2.359
A_51_P487818	Fabp1					0	-3.898
A_51_P389506	Fam220a	0.0401	-1.656
A_55_P2043627	Fam89a					0	-1.775
A_52_P588483	Fbln1					0	-1.929
A_55_P2088615	Fbln5					0.00139	-1.597
A_51_P130095	Fcgr2b					0	2.039
A_51_P176086	Ffar2					0	1.919
A_55_P1984830	Fgl1					0.0128	1.744
A_55_P2011937	Fignl1					0	1.954
A_55_P2145506	Flt3lg					0	-1.587
A_51_P269404	Fmo3					0.0123	-2.613
A_52_P589568	Foxo6					0	-1.553
A_51_P312485	Fpr1					0.0246	-1.678
A_55_P2029682	Fry					0	-1.551
A_55_P1963463	Gabra3					0	-1.959
A_51_P315904	Gadd45g					0	1.82
A_55_P2111855	Gale					0.00139	1.703
A_51_P462428	Galnt15					0	-2.387
A_51_P172054	Gas6					0	-1.662
A_51_P461319	Gatm					0	2.229
A_55_P2106175	Gch1					0	1.71
A_51_P365019	Gclc					0.00139	1.644
A_55_P1960735	Gdf15	0	1.509			0	2.049
A_51_P337089	Gins1					0	1.846
A_55_P2014124	Gjb3					0.00249	1.566
A_55_P2148321	Gm15401					0	1.627
A_55_P2073024	Gm4841					0	1.661
A_55_P1986341	Gm4956					0.0166	-1.607
A_55_P2035757	Gm8884					0	1.622
A_55_P2037697	Gm9733					0	1.65
A_51_P386810	Gmppb					0	1.607
A_51_P438967	Gpnmb	0.0401	1.715	0	2.106	0	2.314
A_55_P2044932	Gpr84					0	2.05
A_55_P2004213	Gprasp2					0.0176	-1.518
A_51_P173709	Gprc5b					0	-1.534
A_51_P503625	Gsta3					0.00249	-1.528
A_55_P2170454	Gsta5					0.00249	-1.964
A_51_P181565	Hbegf					0	1.691
A_51_P488739	Hcar2					0	2.704
A_52_P263658	Hes2					0	-1.708
A_52_P586004	Hk3					0	1.579
A_55_P2109033	Hmgcs2					0	-1.63
A_51_P325836	Hpx					0	2.329
A_55_P2076772	Hspa5					0	1.594
A_55_P1962918	Ifi16					0.00139	2.045
A_51_P487690	Ifi44					0.00736	1.702
A_51_P161021	Ifit2					0.02	1.531
A_55_P1972872	Ifit3					0	1.843
A_52_P281702	Igfbp5					0.00347	-1.828
A_66_P139546	Igfbp6					0	-1.795
A_52_P577384	Il18bp					0	2.012
A_51_P212782	Il1b					0	2.278
A_55_P1964960	Il33					0	2.703
A_55_P2087622	Il4I1					0	2.096
A_55_P1997756	Il6					0	5.331
A_51_P239750	Inhba					0.00592	1.596
A_51_P421876	Irf7					0	1.838
A_52_P175242	Irs1					0	-1.542
A_55_P2103698	Isg15					0.00139	2.285
A_51_P228658	Isyna1					0.00139	1.569
A_55_P2040011	Itga7					0	2.128
A_55_P2060243	Itgbl1					0	-2.086
A_55_P2077055	Itih4			0	1.73	0	2.334
A_55_P2077048	Itih5					0.00139	-1.837
A_55_P1962284	Klhl24					0	-1.547
A_55_P2004562	Klra2			0.0419	-1.554
A_55_P2003414	Kng1					0.00592	2.014
A_55_P2017347	Krtap11-1					0	1.569
A_51_P370458	Krtap17-1					0.00665	-1.795
A_51_P242166	Lap3					0	1.521
A_55_P2070869	Lcn2			0	2.688	0	4.153
A_51_P465281	Lgals1					0.00736	1.625
A_55_P2171116	Lgals3					0	1.912
A_51_P359636	Lgals3bp					0.00665	1.677
A_55_P2070079	Lgals9b					0	1.51
A_51_P361830	Lgi2					0	1.946
A_55_P2152771	Lhfpl2					0	1.547
A_55_P1957459	Lilrb4					0	2.236
A_51_P417251	Loc728392					0	-1.73
A_51_P346938	Lrg1					0.00139	1.545
A_51_P108108	Lrrc25					0.0123	1.507
A_52_P460836	Lrrn4	0	-2.293			0.00736	-2.182
A_55_P2033500	Ltbp4					0	-1.548
A_55_P2015292	Ltc4s					0	-2.302
A_55_P2087118	Ly6a (Includes Others)			0	3.104	0	5.761
A_55_P2090060	Mab21l3					0	1.791
A_55_P2077068	Malt1					0.00139	1.552
A_51_P451458	Mamdc2					0.015	-1.645
A_51_P418168	Manf					0	1.574
A_51_P239203	Mapk13					0	1.6
A_55_P2063626	Matk					0	2.43
A_51_P484111	Matn2					0	-1.699
A_55_P2171206	Matn4					0.0405	-1.556
A_51_P158210	Mcm2					0	1.852
A_51_P360492	Mcm6					0	1.582
A_55_P2076777	Mdfi					0.0292	2.389
A_51_P464918	Mefv					0	2.288
A_55_P2114342	Mirt2					0	1.722
A_55_P2119957	Mlxipl					0.044	-1.84
A_55_P2024803	Mmp12					0	1.688
A_51_P255699	Mmp3					0	2.397
A_52_P315111	Mrpl52					0	1.505
A_52_P423810	Mt1					0.0276	1.502
A_51_P246317	Mt2					0	2.742
A_52_P184149	Mthfd2					0	1.706
A_51_P211506	Muc20					0.00139	2.056
A_55_P2025687	Muc4					0	2.687
A_55_P2007457	Muc5b					0.00347	4.845
A_55_P2118441	Mx1					0	2.409
A_51_P514085	Mx2					0	2.054
A_55_P2093232	Myh7					0	-2.575
A_51_P176352	Ndrg2					0.00665	-1.637
A_55_P1958857	Nek6					0	1.638
A_51_P454217	Nfkb2					0	1.642
A_55_P2100120	Nme1					0	1.573
A_55_P2016959	Nme2					0	1.598
A_55_P2158741	Nos2					0.0139	1.525
A_55_P2111907	Noxo1			0	2.579	0	4.237
A_55_P2003541	Nrcam					0	1.855
A_51_P123077	Nubp1					0	1.51
A_55_P2068167	Nufip2					0.00347	-1.559
A_55_P1998943	Oas1					0	2.148
A_51_P154842	Oas1f					0	1.582
A_55_P2086433	Oasl					0	1.785
A_51_P387123	Oasl2					0	1.839
A_51_P360004	Ocstamp					0	1.541
A_51_P295085	Ogn					0	-1.64
A_51_P342926	Omd					0	-1.567
A_51_P141546	Orm1 (Includes Others)					0	5.598
A_55_P2049752	Pamr1					0	-1.812
A_55_P2132358	Pbdc1					0	1.563
A_55_P2053491	Pdia6					0	1.538
A_51_P317941	Perp					0	-1.604
A_55_P2015687	Phf11					0	1.648
A_55_P2000284	Phox2a					0.00249	2.08
A_55_P1999902	Pip5k1a					0	1.781
A_55_P1962305	Plac8					0	1.684
A_55_P2060991	Plppr3					0	1.795
A_51_P108659	Pon1					0.00929	-1.838
A_51_P443508	Ppa1					0.00139	1.66
A_55_P2009673	Ppp1r14d					0.0155	1.964
A_55_P2026275	Ppp1r1b					0.0224	-1.533
A_51_P127464	Ppp1r37					0	-1.815
A_51_P168632	Prim1					0	1.632
A_55_P2055087	Prkar2b					0.0304	-1.652
A_55_P2021821	Prmt1					0.0145	-1.604
A_51_P170959	Proz					0	2.711
A_51_P113784	Prpf19					0.00994	-1.501
A_55_P2041868	Ptafr					0	1.722
A_55_P1994309	Ptgir			0	1.752	0	1.876
A_51_P279100	Ptgs1					0	1.927
A_52_P605812	Ptrh1					0	1.675
A_52_P426740	Rab27a					0.00347	-1.697
A_55_P1994927	Rab3Il1					0	1.611
A_52_P11441	Rab6b					0.00592	-1.537
A_51_P148105	Rad51					0	1.658
A_55_P2013765	Raly					0.015	1.511
A_51_P348665	Ramp1					0	-1.741
A_51_P340699	Rasl11a	0	-1.747
A_51_P262340	Rbm3					0	1.515
A_51_P433127	Rdm1					0	-1.565
A_51_P257951	Retnla	0	2.266			0.00347	1.914
A_55_P2159807	Rfc4					0	1.509
A_51_P260683	Rgs1					0	2.449
A_51_P491987	Ripk3					0	1.577
A_51_P455338	Rnase2					0.0145	-1.701
A_51_P237383	Rnase4					0	-1.9
A_51_P111164	Rnd1					0.00515	-1.543
A_55_P2051094	Rorc					0	-1.517
A_51_P379710	Rpn1					0.00139	1.53
A_52_P670026	Rsad2					0.0171	1.75
A_51_P304170	Rtp4					0	1.593
A_51_P419226	S100a14					0	2.432
A_52_P318673	Saa1					0	13.394
A_55_P2060429	Scube2					0.00347	-1.677
A_51_P280446	Sdf2l1					0	2.346
A_55_P2051962	Sec61b					0	1.548
A_55_P2155421	Sec61g					0	1.556
A_52_P410765	Sema7a					0	1.53
A_55_P2014284	Serpina11					0.0111	2.019
A_51_P159453	Serpina3					0	2.814
A_55_P2142226	Serpina3g (Includes Others)					0	2.406
A_55_P2142222	Serpina3h					0	1.622
A_55_P1993933	Serpinb1c	0	11.363			0	14.816
A_51_P468140	Serpind1					0.00665	1.85
A_51_P148037	Sh3Pxd2b					0	1.652
A_51_P444290	Slamf8					0	1.581
A_51_P514319	Slc13a4					0.0155	-1.593
A_55_P1964752	Slc23a3					0	1.834
A_51_P224164	Slc26a4			0	8.86	0	12.516
A_55_P2013760	Slc39a14					0	1.729
A_51_P112734	Slc7a8					0	1.785
A_55_P2135656	Slco1a2	0.0401	2.383			0.00249	2.098
A_55_P1989653	Slco4a1					0	1.718
A_52_P472324	Slpi					0.0423	1.966
A_55_P2002903	Smoc2					0	-2.147
A_51_P509643	Snca					0.0134	-1.502
A_66_P116372	Soat2					0	1.537
A_51_P279606	Socs1					0.00139	1.622
A_55_P1953301	Sord					0	-1.51
A_51_P404193	Sp5					0.00139	1.895
A_55_P2171764	Spag11b					0.0319	-1.592
A_52_P381484	Spon2	0.0401	-1.901			0.00736	1.679
A_51_P139678	Sprr1a					0	2.125
A_55_P2048855	Sprr2a3					0.00866	3.629
A_55_P1975185	Sqle					0	1.568
A_55_P2286243	Srrm4os	0	1.535
A_52_P546090	Ssr4					0	1.51
A_51_P177261	Stac3					0.00433	-1.9
A_51_P143893	Steap4					0.00929	1.558
A_51_P240801	Sting1					0	1.545
A_55_P2033435	Stra6l					0	1.769
A_51_P450527	Tagln	0.0401	1.87			0.00249	1.812
A_52_P228236	Tfrc					0	1.615
A_51_P212754	Tgfbi					0	1.808
A_52_P627816	Tgm1					0	2.294
A_55_P1960291	Tjp3					0	1.543
A_55_P1971962	Tmem176b					0	1.784
A_51_P401501	Tmem213					0.0123	2.296
A_52_P668984	Tmem243					0	1.606
A_51_P401987	Tmem37					0	1.542
A_51_P385099	Tnf					0	1.632
A_55_P2082180	Tnfrsf9					0	3.9
A_55_P2197338	Tnfsf13os	0	1.529			0	1.548
A_51_P293339	Tob1					0	-1.562
A_51_P398260	Tppp					0.026	-1.51
A_51_P343833	Traf1					0	-1.519
A_55_P2108837	Tuba1c					0	1.699
A_51_P490023	Tubb2a					0	1.555
A_51_P421140	Tubb6					0	1.632
A_51_P398878	Uck2					0	1.568
A_55_P2035286	Uhrf1					0	2.139
A_55_P2156425	Upk1a			0	-1.86	0	-1.841
A_51_P113195	Upk1b					0.00139	-1.675
A_52_P114889	Upk3b					0.00433	-2.179
A_55_P2114953	Usp18					0	1.993
A_52_P127362	Vmp1					0	1.539
A_51_P424532	Vnn1					0.00249	1.545
A_51_P265374	Vnn3					0	2.035
A_55_P2129488	Wfdc10					0.00139	-1.683
A_52_P700056	Wfdc17					0.0228	1.86
A_55_P1953143	Wt1					0.0361	-2.24
A_55_P1966833	Xaf1					0	1.672
A_55_P1994042	Zbp1					0	2.384
A_55_P1995768	Znf442					0.00249	-1.505
A_55_P1996046	Znf559-Znf177					0	-1.516

## Sheet: c.NRCWE-056
Table S4. Upregulated and downregulated genes in mouse lung tissue after 1 day of exposure to NM-411, NRCWE-055, NRCWE-056, and NRCWE-057.
Table S4c. Upregulated and downregulated genes in mouse lung tissue after exposure to NRCWE-056. FDR adjusted p-value ≤ 0.05 and fold change ≤ −1.5 or ≥ 1.5.
		Low dose (6 µg/mouse)		Medium dose (18 µg/mouse)		High dose (54 µg/mouse)
Agilent ID	Gene Symbol	FDR adj p-value	Fold Change	FDR adj p-value	Fold Change	FDR adj p-value	Fold Change
A_55_P2054342	2810408I11Rik					0	1.559
A_55_P2383083	5430402P08Rik	0	1.63	0.05	1.51
A_52_P665675	Abca1					0	-1.684
A_51_P123625	Acod1					0.0322	1.735
A_55_P2114074	Acrbp					0	-1.517
A_52_P420504	Acta2					0.0174	1.659
A_55_P2159555	Adamts4					0.00454	1.745
A_55_P1972605	Adora3					0.0398	1.623
A_55_P1992849	Adrb3					0.00265	-2.268
A_51_P510891	Afp					0	1.542
A_51_P338485	Aldh6a1					0	-1.647
A_51_P494125	Alpl					0	1.527
A_51_P348804	Amotl2					0	-1.53
A_55_P1983418	Amy2a					0.0341	-2.17
A_55_P2139402	Amy2b					0.0439	-1.563
A_51_P303160	Arg1					0.00265	3.126
A_55_P2027812	Arxes1/Arxes2					0	-1.523
A_66_P124179	Atp6v0d2					0.00454	1.745
A_55_P1971599	Bcan					0.0127	-1.881
A_52_P340669	Bhlha15					0	2.056
A_51_P272553	Bhlhe40					0	1.677
A_52_P401640	Bpgm					0.021	-1.532
A_55_P2124941	Brinp1					0.036	1.506
A_55_P2137049	C15orf48					0	4.999
A_51_P110301	C3					0.00912	2.36
A_51_P316042	Card11					0.00454	-1.523
A_66_P104365	Ccdc167					0	1.69
A_51_P114462	Ccl17					0.00265	3.859
A_51_P286737	Ccl2					0	3.053
A_51_P140710	Ccl3l3					0.0115	1.603
A_51_P509573	Ccl4					0.0192	2.033
A_51_P436652	Ccl7					0	6.265
A_51_P464703	Ccl8					0	4.148
A_51_P185660	Ccl9					0.00781	1.938
A_51_P481920	Ccna2					0.0104	1.506
A_51_P291501	Ccno					0	1.629
A_52_P578732	Ccr5					0.0265	1.682
A_51_P172853	Cd14					0.00454	2.058
A_51_P125135	Cdca5					0	1.766
A_51_P133612	Cdt1					0	1.678
A_51_P492830	Cenph					0	1.77
A_55_P2077263	Cenpk					0	1.786
A_51_P178772	Ces1f					0.0421	-2.048
A_51_P413866	Cfb					0.0445	1.53
A_51_P196973	Chaf1a					0	1.639
A_55_P2085181	Chaf1b					0	1.798
A_52_P56636	Chia					0.0104	1.865
A_51_P167292	Chil3/Chil4					0.0104	1.975
A_55_P2137010	Chrna7					0.0165	1.705
A_51_P227004	Cks1b					0	1.693
A_51_P246653	Clec7a					0	1.942
A_55_P2142028	Clip4					0.0201	1.788
A_52_P424784	Clstn2			0	-1.521
A_51_P174275	Colec11					0.00781	-1.513
A_55_P2043337	Colq					0.0136	-1.723
A_55_P2111302	Cp					0.00265	2.486
A_51_P139108	Cpxm1					0.0336	1.681
A_51_P171075	Csf2					0.00912	1.659
A_55_P2038106	Cst8					0.0218	-1.867
A_51_P114910	Cstb					0	1.517
A_51_P251357	Ctps1					0	1.766
A_55_P1961335	Ctsk			0	1.918	0	2.514
A_51_P212308	Cxadr					0	1.606
A_55_P2016462	Cxcl10					0	3.958
A_55_P1966204	Cxcl12					0.00265	2.39
A_52_P232813	Cxcl3					0.00265	1.786
A_55_P1990032	Cxcl6					0	6.575
A_55_P2103249	Cxcr1	0	1.871			0	2.02
A_51_P501844	Cyp26b1					0.0341	-4.799
A_51_P461429	Cyp7b1					0	2.272
A_55_P2133405	Dmkn					0.0104	2.034
A_51_P446469	Dok2					0.00632	1.726
A_51_P473259	Dpyd					0.0136	-1.708
A_55_P2101757	Dscc1					0	1.725
A_55_P2164534	Dtl					0	2.594
A_55_P2004375	Ear2 (Includes Others)			0.0346	1.564	0.00781	-1.868
A_55_P2011912	Ecm2					0.0183	-1.508
A_55_P1976127	Ect2					0	1.693
A_52_P232830	Ets1			0	-1.566
A_51_P239984	Exo1					0	1.968
A_51_P174961	F10					0.00265	1.878
A_51_P484054	F7					0.0235	1.543
A_51_P487818	Fabp1					0.00265	-3.342
A_55_P2160910	Faim2					0	-1.552
A_51_P389506	Fam220a			0.0217	-1.566	0	-1.645
A_51_P130095	Fcgr2b					0.0174	1.702
A_51_P176086	Ffar2					0.0295	1.556
A_55_P2011937	Fignl1					0	2.306
A_55_P1952379	Fkbp5			0.0346	1.581
A_51_P207622	Fmod					0.00912	-1.621
A_51_P315904	Gadd45g					0	1.592
A_55_P2111855	Gale					0.00912	1.629
A_51_P462428	Galnt15					0	-2.112
A_51_P461319	Gatm					0.0165	1.622
A_55_P2106175	Gch1					0	1.599
A_51_P365019	Gclc					0	1.731
A_55_P1960735	Gdf15					0	1.887
A_51_P337089	Gins1					0	1.955
A_55_P2107357	Gm15421					0.0115	1.907
A_52_P222230	Gm40525					0.0115	2.029
A_51_P386810	Gmppb					0	1.516
A_51_P438967	Gpnmb	0	1.817	0	1.89	0	2.417
A_55_P2044932	Gpr84					0.00265	1.574
A_55_P2004213	Gprasp2					0.0136	-1.573
A_51_P270949	H1F5					0.0165	1.607
A_55_P2084631	H2Ac11					0.0265	1.508
A_52_P33382	Hba-Ps4					0	-1.752
A_51_P181565	Hbegf					0	1.536
A_51_P351970	Hells					0	1.51
A_52_P263658	Hes2					0.0115	-1.539
A_55_P2109033	Hmgcs2					0	-1.643
A_51_P325836	Hpx					0	1.717
A_55_P2076772	Hspa5					0.00265	1.571
A_51_P487690	Ifi44					0.0192	1.67
A_51_P161021	Ifit2					0.0472	1.517
A_55_P1972872	Ifit3					0.00454	1.685
A_51_P294555	Ifitm6					0.0404	-1.638
A_66_P139546	Igfbp6					0.0183	-1.541
A_52_P577384	Il18bp					0	1.558
A_55_P1964960	Il33					0.00265	2.316
A_55_P2087622	Il4I1					0.0251	1.599
A_55_P1997756	Il6					0	3.038
A_51_P421876	Irf7					0.0174	1.741
A_55_P2103698	Isg15					0	2.259
A_52_P459929	Itga1			0	-1.61
A_55_P2040011	Itga7					0.00265	1.948
A_51_P303424	Itgax					0.00265	1.532
A_55_P2060243	Itgbl1					0.0192	-1.673
A_55_P2077055	Itih4					0	2.15
A_55_P2077048	Itih5					0	-1.959
A_55_P2084965	Klk13					0	1.743
A_55_P2003414	Kng1					0.0495	1.814
A_51_P242166	Lap3					0	1.538
A_55_P2070869	Lcn2			0	2.351	0	3.306
A_55_P2171116	Lgals3					0	1.786
A_51_P361830	Lgi2					0	1.841
A_51_P285446	Lig1					0	1.725
A_55_P1957459	Lilrb4					0	2.047
A_52_P669005	Lrat					0.0484	-2.077
A_52_P285470	Lrp2					0	1.584
A_55_P2015292	Ltc4s					0.0244	-1.752
A_55_P2087118	Ly6a (Includes Others)					0	3.689
A_51_P105068	Lypd6b			0.0217	1.709
A_55_P2090060	Mab21l3					0	1.523
A_51_P418168	Manf					0	1.579
A_51_P170807	Map3k6			0	1.643
A_51_P239203	Mapk13					0	1.615
A_55_P2063626	Matk					0.0174	1.636
A_51_P158210	Mcm2					0	1.857
A_51_P324934	Mcm3					0	1.502
A_51_P356762	Mcm4					0	1.512
A_51_P190111	Mcm5					0.00265	1.544
A_51_P360492	Mcm6					0	1.725
A_51_P165704	Mcm7					0	1.576
A_55_P2013336	Melk					0	1.888
A_55_P2024803	Mmp12					0.00265	1.611
A_51_P255699	Mmp3					0	2.076
A_51_P246317	Mt2					0.00265	1.811
A_66_P117578	Mtmr7					0	1.672
A_51_P211506	Muc20					0.00265	2.071
A_55_P2025687	Muc4					0	2.977
A_55_P2007457	Muc5b					0.0218	3.946
A_55_P2118441	Mx1					0	2.135
A_51_P514085	Mx2					0.0127	1.707
A_55_P2093232	Myh7					0.0427	-1.703
A_51_P176352	Ndrg2					0.028	-1.574
A_55_P2111907	Noxo1			0	2.054	0	2.99
A_51_P254262	Nxph3					0.00265	-1.574
A_55_P1998943	Oas1					0	1.987
A_51_P154842	Oas1f					0	1.504
A_55_P2086433	Oasl					0.00265	1.583
A_51_P387123	Oasl2					0.0104	1.617
A_51_P295085	Ogn					0.00632	-1.632
A_51_P342926	Omd					0	-1.519
A_51_P223709	Pask					0	1.516
A_51_P230098	Pbk					0	1.818
A_51_P345649	Pdgfra					0.00454	-1.52
A_55_P2053491	Pdia6					0	1.593
A_51_P204442	Phf19					0	1.55
A_55_P2083963	Phgr1			0.0416	1.639	0.00454	1.662
A_55_P2000284	Phox2a					0.0336	1.727
A_55_P2060991	Plppr3					0.00265	1.596
A_51_P269687	Pole2					0	1.546
A_51_P443508	Ppa1					0.0192	1.534
A_51_P428372	Ppbp					0.036	-1.522
A_55_P2009673	Ppp1r14d					0.0227	1.992
A_51_P168632	Prim1					0	1.657
A_51_P170959	Proz					0.00265	2.434
A_55_P1994309	Ptgir					0.0145	1.602
A_51_P279100	Ptgs1					0.00454	1.782
A_52_P605812	Ptrh1					0	1.529
A_51_P148105	Rad51					0	2.138
A_51_P257951	Retnla					0.00265	2.065
A_55_P2159807	Rfc4					0	1.529
A_51_P260683	Rgs1					0	2.042
A_52_P236705	Ripply3			0	-1.736
A_51_P455338	Rnase2					0.0348	-1.669
A_51_P247637	Rnf144a			0.0217	-1.564
A_55_P2173982	Rrm2					0	1.579
A_51_P419226	S100a14					0	2.242
A_51_P281089	S100a6					0	1.517
A_52_P318673	Saa1					0	6.754
A_51_P472217	Sapcd2					0.00781	1.659
A_51_P280446	Sdf2l1					0	2.183
A_55_P2051962	Sec61b					0	1.536
A_51_P159453	Serpina3					0	2.491
A_55_P2142232	Serpina3g (Includes Others)					0	2.081
A_55_P1993933	Serpinb1c	0	6.763	0.0416	6.245	0	14.371
A_51_P487999	Sgo1					0.00265	1.503
A_51_P148037	Sh3pxd2b					0	1.546
A_51_P204402	Shcbp1					0.00265	1.641
A_52_P139650	Ska1					0	1.631
A_51_P514319	Slc13a4					0.0375	-1.563
A_55_P1964752	Slc23a3			0.0217	1.602	0	1.723
A_51_P343429	Slc25a37					0	-1.611
A_51_P224164	Slc26a4					0	9.813
A_51_P196972	Slc4a1					0.0145	-2.448
A_51_P112734	Slc7a8					0.0369	1.554
A_55_P2135656	Slco1a2					0	2.591
A_55_P2172274	Smc2					0.00265	4.445
A_51_P509643	Snca					0.00454	-1.663
A_52_P160955	Sox11			0	-1.687
A_55_P2121608	Sox4			0	-1.624
A_51_P404193	Sp5					0.0218	1.57
A_55_P1965154	Spc25					0	1.854
A_51_P139678	Sprr1a					0.021	1.748
A_55_P2033435	Stra6l					0	1.836
A_51_P273538	Syce2					0	1.512
A_51_P450527	Tagln					0.0183	1.667
A_51_P511250	Tent5b			0.0217	1.647
A_52_P228236	Tfrc					0	1.625
A_51_P212754	Tgfbi					0	1.721
A_52_P627816	Tgm1					0.00912	1.679
A_55_P1960291	Tjp3					0	1.556
A_55_P1971962	Tmem176b					0	1.648
A_55_P2178578	Tmprss4					0.00265	1.562
A_55_P2082180	Tnfrsf9					0	2.646
A_55_P2018017	Tnfsf10			0.0217	-1.515
A_51_P497402	Tonsl					0	1.533
A_51_P105709	Trip13					0	1.65
A_55_P2108837	Tuba1c					0	1.681
A_51_P421140	Tubb6					0	1.536
A_51_P351363	Tyms-ps					0	1.577
A_55_P2035286	Uhrf1					0	2.759
A_55_P2156425	Upk1a					0	-1.847
A_51_P113195	Upk1b					0.0104	-1.623
A_55_P2114953	Usp18					0.00265	1.682
A_52_P127362	Vmp1					0	1.54
A_66_P136186	Wee1					0	1.503
A_51_P487073	Wfdc12					0.0489	1.544
A_55_P1973447	Ybx2					0.0227	1.552
A_55_P1994042	Zbp1					0.00265	1.95
A_55_P2097518	Zdhhc22					0.00454	-1.987

## Sheet: d.NRCWE-057
Table S4. Upregulated and downregulated genes in mouse lung tissue after 1 day of exposure to NM-411, NRCWE-055, NRCWE-056, and NRCWE-057.
Table S4d. Upregulated and downregulated genes in mouse lung tissue after exposure to NRCWE-057. FDR adjusted p-value ≤ 0.05 and fold change ≤ −1.5 or ≥ 1.5.
		Low dose (6 µg/mouse)		Medium dose (18 µg/mouse)		High dose (54 µg/mouse)
Agilent ID	Gene Symbol	FDR adj p-value	Fold Change	FDR adj p-value	Fold Change	FDR adj p-value	Fold Change
A_51_P502872	2200002D01Rik					0	1.559
A_55_P2437763	8430431K14Rik					0.00305	-1.527
A_52_P665675	Abca1					0.00799	-1.505
A_51_P123625	Acod1					0	2.663
A_51_P328652	Acot7					0	1.667
A_52_P420504	Acta2					0.0216	1.621
A_55_P2025765	Adam8					0.0188	2.26
A_55_P1955778	Adamts4					0	1.872
A_55_P1972605	Adora3					0	2.312
A_55_P1992849	Adrb3					0.00305	-2.124
A_51_P424854	Ahsg					0.0417	1.765
A_51_P128987	Akr1b10					0	1.739
A_52_P87843	Aldh1a3					0.00305	2.976
A_51_P338485	Aldh6a1					0	-1.646
A_52_P151240	Alkal1					0.00176	1.835
A_51_P494125	Alpl					0	1.651
A_52_P120803	Ankrd1					0.0331	1.921
A_51_P497724	Apol7e (Includes Others)					0.00176	1.624
A_51_P303160	Arg1					0	3.53
A_52_P374897	Arg2					0	1.83
A_51_P417074	Arhgap8/Prr5-Arhgap8					0	1.525
A_55_P1978241	Artn					0	1.555
A_55_P2027812	Arxes1/Arxes2					0	-1.72
A_55_P2003824	Asgr1					0.031	-1.758
A_52_P452689	Atf3					0	1.592
A_66_P124179	Atp6v0d2					0.00176	1.876
A_55_P2347756	Au040972					0.00176	2.838
A_51_P456721	Azgp1					0.00525	-1.634
A_55_P2110758	B430306n03Rik					0.00525	1.715
A_51_P419286	Batf3					0	1.906
A_55_P1971599	Bcan					0.0322	-1.743
A_52_P299771	Bcl2a1c					0.0118	1.711
A_51_P237668	Bex1					0.0118	-1.569
A_52_P340669	Bhlha15					0.0104	1.706
A_51_P272553	Bhlhe40					0	1.615
A_55_P2076360	Bpifb1					0.00417	7.737
A_55_P2137049	C15orf48					0	8.248
A_55_P2151011	C1qtnf7					0.00176	-1.533
A_51_P110301	C3					0	3.123
A_52_P60194	C4bp					0	1.574
A_55_P2156855	Ca13					0	1.775
A_51_P416419	Calr					0	1.658
A_51_P277336	Cavin2					0.00176	-1.59
A_66_P104365	Ccdc167					0	1.835
A_51_P114462	Ccl17					0	6.467
A_51_P286737	Ccl2					0	3.481
A_51_P140710	Ccl3l3					0.0222	1.561
A_51_P509573	Ccl4					0	2.488
A_51_P436652	Ccl7					0	7.778
A_51_P464703	Ccl8					0	4.521
A_51_P185660	Ccl9					0	2.408
A_52_P578732	Ccr5					0.00885	1.769
A_51_P172853	Cd14					0	2.955
A_51_P385718	Cd177					0.00622	1.892
A_51_P517430	Cd1d					0.0231	-1.526
A_55_P1961943	Cd68					0	1.557
A_51_P413866	Cfb					0.00176	1.92
A_51_P372550	Cgref1					0.031	2.114
A_55_P2085181	Chaf1b					0	1.573
A_52_P56636	Chia					0.0139	1.814
A_51_P167292	Chil3/Chil4					0.0246	1.791
A_52_P441294	Chl1					0.0382	2.013
A_52_P390944	Chst3					0.00176	-1.511
A_51_P246653	Clec7a					0	2.081
A_55_P2142028	Clip4					0	2.562
A_55_P2067608	Clmp					0	1.556
A_55_P2089520	Col10a1					0.0405	1.577
A_55_P2043337	Colq					0.0177	-1.622
A_55_P2151071	Cox7a2l					0	-1.568
A_55_P2111302	Cp					0.00525	2.343
A_51_P139108	Cpxm1					0	1.906
A_52_P541270	Crebl2					0.00176	-1.588
A_51_P122246	Creld2					0	1.744
A_51_P171075	Csf2					0	2.053
A_51_P146753	Csf2rb					0	1.758
A_51_P114910	Cstb					0	1.725
A_51_P251357	Ctps1					0	1.964
A_52_P195839	Ctsc					0	1.688
A_52_P660945	Ctsf					0	-1.515
A_55_P1961335	Ctsk			0	1.951	0	2.318
A_55_P2016462	Cxcl10					0	4.967
A_55_P1966204	Cxcl12					0	2.404
A_52_P232813	Cxcl3					0	2.28
A_55_P1990032	Cxcl6			0	8.214	0	22.413
A_55_P2103249	Cxcr1					0.0146	1.621
A_51_P461429	Cyp7b1					0	3.006
A_55_P2032079	Dbp	0	2.247			0.0455	-1.686
A_55_P2148748	Dclk1					0.00305	1.518
A_55_P2133405	Dmkn					0	2.531
A_51_P188073	Dnajb11					0	1.577
A_51_P446469	Dok2					0	1.934
A_51_P473259	Dpyd					0.00713	-1.726
A_55_P2101757	Dscc1					0.00525	1.507
A_55_P2164534	Dtl					0	1.809
A_55_P2083297	E230025N22Rik					0.0393	1.689
A_55_P2004375	Ear2 (Includes Others)					0	1.829
A_55_P2011912	Ecm2					0.00713	-1.517
A_51_P367866	Egr1					0.0443	1.665
A_66_P109519	Ehf					0.0146	1.543
A_51_P480241	Elf3					0.0241	1.5
A_51_P222359	Emilin1					0	1.567
A_55_P2002578	Ephx1					0	-1.533
A_51_P174961	F10					0	2.287
A_51_P484054	F7					0.0118	1.627
A_51_P487818	Fabp1					0.0286	-2.629
A_55_P2160910	Faim2					0	-1.734
A_52_P270429	Fam25c					0.0322	1.562
A_55_P2088615	Fbln5					0	-1.597
A_52_P408757	Fcgr2a					0.0338	1.507
A_51_P130095	Fcgr2b					0.00417	1.842
A_55_P1966804	Fdps					0	1.561
A_51_P176086	Ffar2					0	2.192
A_51_P362176	Fgg					0.0104	1.738
A_55_P1984830	Fgl1					0	2.655
A_55_P2011937	Fignl1					0	1.818
A_55_P2145506	Flt3lg					0	-1.519
A_52_P466701	Fuom					0.00622	1.507
A_51_P315904	Gadd45g					0	1.88
A_55_P2111855	Gale					0	1.841
A_51_P462428	Galnt15					0.0188	-1.586
A_51_P461319	Gatm					0.00885	1.677
A_55_P2106175	Gch1					0	1.838
A_51_P365019	Gclc					0	1.874
A_55_P1960735	Gdf15			0	1.899	0	1.905
A_51_P337089	Gins1					0	1.901
A_55_P2096967	Gjb1					0.00885	1.736
A_52_P382886	Gjb2					0	2.073
A_55_P2148321	Gm15401					0	1.655
A_55_P2073024	Gm4841					0.00176	1.545
A_55_P1986341	Gm4956					0	-1.929
A_52_P465129	Gm5150					0.0211	1.549
A_55_P2035757	Gm8884					0	1.765
A_51_P386810	Gmppb					0	1.585
A_55_P2108201	Gnptab					0	1.534
A_51_P438967	Gpnmb			0	1.969	0	2.013
A_55_P2044932	Gpr84					0	1.772
A_55_P2170454	Gsta5					0	-2.56
A_55_P2062190	Gstm5					0.00176	-1.535
A_51_P181565	Hbegf					0	1.588
A_51_P488739	Hcar2					0	2.562
A_52_P263658	Hes2					0.00417	-1.646
A_52_P586004	Hk3					0	1.606
A_51_P325836	Hpx					0	2.227
A_55_P2076772	Hspa5					0	1.848
A_55_P1962918	Ifi16					0.0139	1.888
A_51_P487690	Ifi44					0.0182	1.639
A_55_P1972872	Ifit3					0.0194	1.521
A_55_P2146254	Ifitm1					0.00176	1.559
A_52_P577384	Il18bp					0	1.83
A_51_P212782	Il1b					0	2.101
A_55_P1964960	Il33					0.00176	2.7
A_55_P2087622	Il4I1					0	2.306
A_55_P1997756	Il6					0	4.347
A_55_P1973563	Inava					0.0188	1.59
A_52_P622244	Insyn1					0	1.62
A_51_P421876	Irf7					0.00622	1.743
A_55_P2103698	Isg15					0.00176	2.023
A_51_P228658	Isyna1					0	1.652
A_55_P2040011	Itga7					0	2.523
A_51_P303424	Itgax					0	1.501
A_55_P2077055	Itih4					0	2.73
A_55_P2077048	Itih5					0.016	-1.662
A_55_P2128148	Kiaa0754					0.00305	-1.52
A_55_P1962289	Klhl24					0	-1.523
A_55_P2003414	Kng1					0	2.812
A_55_P1981366	Lamc2					0	1.503
A_55_P2091741	Lamp3					0.00176	1.531
A_51_P242166	Lap3					0	1.652
A_55_P2070869	Lcn2			0	2.303	0	4.184
A_51_P465281	Lgals1					0.0271	1.529
A_55_P2171116	Lgals3					0	1.843
A_51_P361830	Lgi2					0	2.048
A_55_P2152771	Lhfpl2					0	1.507
A_55_P1957459	Lilrb4					0	2.332
A_52_P137765	Lmna					0	1.591
A_51_P346938	Lrg1					0	1.644
A_52_P285470	Lrp2					0	1.712
A_51_P384673	Lrrc59					0	1.534
A_52_P15388	Ltf					0.0413	4.218
A_51_P517695	Ly6a (Includes Others)			0	2.247	0	5.958
A_51_P105068	Lypd6b					0.0111	1.627
A_55_P2090060	Mab21l3					0	1.927
A_55_P2113160	Mal					0	1.736
A_55_P2077068	Malt1					0	1.584
A_51_P418168	Manf					0	1.807
A_51_P239203	Mapk13					0	1.597
A_55_P2063626	Matk					0	1.866
A_51_P158210	Mcm2					0	1.719
A_51_P360492	Mcm6					0	1.501
A_51_P464918	Mefv					0.00176	1.851
A_51_P279437	Mfsd2a					0	3.565
A_55_P2004777	Micall2					0	1.52
A_55_P2024803	Mmp12					0.0132	1.503
A_51_P255699	Mmp3					0	2.765
A_52_P423810	Mt1					0.0171	1.55
A_51_P246317	Mt2					0	2.334
A_52_P184149	Mthfd2					0	1.537
A_51_P445487	Mturn					0.00305	-1.577
A_51_P211506	Muc20					0.00417	2.075
A_55_P2025687	Muc4					0	3.417
A_55_P2007457	Muc5b					0	6.447
A_51_P355943	Mvd					0	1.666
A_55_P2118441	Mx1					0	2.234
A_51_P514085	Mx2					0	1.93
A_55_P2013665	Mybpc2					0.0429	1.558
A_55_P2093232	Myh7					0	-2.123
A_51_P176352	Ndrg2					0.0313	-1.524
A_55_P1958857	Nek6					0	1.682
A_51_P454217	Nfkb2					0	1.641
A_51_P235123	Nfkbie					0	1.659
A_55_P2100120	Nme1					0	1.633
A_55_P2016959	Nme2					0	1.564
A_55_P2304507	Noxa1					0.0496	1.62
A_55_P2111907	Noxo1					0	4.837
A_55_P1998943	Oas1					0.00176	1.875
A_55_P2086433	Oasl					0	1.683
A_51_P387123	Oasl2					0	1.651
A_51_P295085	Ogn					0.00176	-1.668
A_51_P141546	Orm1 (Includes Others)					0	5.75
A_52_P592951	Ostc					0	1.528
A_52_P587738	P2ry2					0	1.615
A_55_P2132358	Pbdc1					0	1.518
A_51_P165451	Pbld2					0.00713	1.651
A_51_P245789	Pcolce2					0.00305	-1.529
A_51_P345649	Pdgfra					0	-1.689
A_55_P2053491	Pdia6					0	1.725
A_55_P2083963	Phgr1					0.00176	1.752
A_55_P1999902	Pip5K1a					0	1.681
A_55_P2175060	Plpp5					0.00305	1.528
A_51_P108659	Pon1					0	-2.186
A_51_P443508	Ppa1					0	1.815
A_55_P2009673	Ppp1r14d					0.0111	2.063
A_51_P168632	Prim1					0	1.551
A_51_P170959	Proz					0	3.487
A_55_P2041868	Ptafr					0.00305	1.509
A_55_P1974189	Ptges					0.00176	1.678
A_55_P1994309	Ptgir					0.00305	1.719
A_51_P279100	Ptgs1					0	2.211
A_52_P605812	Ptrh1					0	1.561
A_55_P1994927	Rab3Il1					0	1.658
A_52_P11441	Rab6b					0	-1.591
A_51_P340699	Rasl11a	0	-1.649
A_51_P433127	Rdm1					0	-1.525
A_51_P354126	Reg3g					0.0374	12.395
A_51_P389751	Relb					0	1.579
A_51_P257951	Retnla					0.00176	1.969
A_51_P260683	Rgs1					0	1.832
A_66_P126313	Rhof					0	1.656
A_51_P379710	Rpn1					0.00417	1.523
A_52_P670026	Rsad2					0.0166	1.805
A_51_P419226	S100a14					0	2.435
A_51_P281089	S100a6					0	1.568
A_52_P318673	Saa1					0	10.32
A_55_P1959496	Sbno2					0	1.559
A_55_P2232988	Scube2					0	-1.754
A_51_P280446	Sdf2l1					0	2.521
A_55_P2051962	Sec61b					0	1.645
A_55_P2155421	Sec61g					0	1.6
A_51_P159453	Serpina3					0	2.403
A_55_P2142232	Serpina3g (Includes Others)					0	2.413
A_55_P2142222	Serpina3h					0	1.694
A_55_P1993933	Serpinb1c					0	13.57
A_51_P468140	Serpind1					0.00885	1.833
A_66_P134428	Sfrp1					0.00176	1.691
A_51_P148037	Sh3pxd2b					0	1.768
A_51_P238523	Shisa4					0.00305	1.544
A_55_P2143923	Slc13a2					0	2.575
A_51_P514319	Slc13a4					0.02	-1.581
A_55_P1964752	Slc23a3					0	1.959
A_51_P224164	Slc26a4			0	5.875	0	17.397
A_51_P209319	Slc35b1					0	1.61
A_55_P2013760	Slc39a14					0	1.618
A_52_P669128	Slc5a1					0.00417	1.653
A_55_P2032916	Slc6a20					0.00305	1.746
A_51_P112734	Slc7a8					0.0301	1.557
A_55_P2135656	Slco1a2			0	2.703	0.00305	2.244
A_55_P1989653	Slco4a1					0.00305	1.596
A_52_P472324	Slpi					0.00622	2.444
A_55_P1953301	Sord					0	-1.552
A_51_P404193	Sp5					0	2.121
A_55_P2171764	Spag11b					0.0126	-1.705
A_52_P381484	Spon2	0	-1.928			0.00417	1.752
A_51_P139678	Sprr1a					0	2.263
A_55_P2048855	Sprr2a3					0.00176	4.351
A_55_P1975185	Sqle					0	1.613
A_52_P546090	Ssr4					0	1.528
A_51_P177261	Stac3					0.0296	-1.638
A_51_P484158	Steap1					0.0479	1.787
A_55_P2133315	Steap2					0.00176	1.8
A_51_P143893	Steap4					0	1.918
A_55_P2033435	Stra6l					0	1.688
A_51_P321341	Sult1a1					0	-1.535
A_51_P450527	Tagln					0.0496	1.518
A_55_P1979893	Tef					0.00417	-1.653
A_55_P2168168	Tex11	0	1.659
A_52_P228236	Tfrc					0	1.823
A_51_P212754	Tgfbi					0	1.876
A_52_P627816	Tgm1					0	2.372
A_55_P1960291	Tjp3					0	1.881
A_51_P284244	Tmed3					0	1.506
A_55_P1971962	Tmem176b					0	1.881
A_51_P401501	Tmem213					0.0206	2.182
A_52_P668984	Tmem243					0	1.548
A_55_P2178578	Tmprss4					0	1.689
A_51_P385099	Tnf					0	1.675
A_55_P2147081	Tnfaip6					0	1.593
A_55_P2082180	Tnfrsf9					0	4.267
A_51_P257934	Tnfsf13b					0	1.68
A_55_P2197338	Tnfsf13os			0	1.504	0	1.68
A_55_P2010038	Tnfsf9					0	1.626
A_55_P2071354	Togaram2					0.044	1.699
A_55_P2108837	Tuba1c					0	1.747
A_55_P2077783	Tubb2a-ps2					0	1.51
A_51_P421140	Tubb6					0	1.628
A_51_P398878	Uck2					0	1.586
A_55_P2035286	Uhrf1					0	1.94
A_55_P2156425	Upk1a					0	-2.112
A_55_P1971006	Urah					0	1.531
A_55_P2114953	Usp18					0	1.686
A_52_P127362	Vmp1					0	1.792
A_51_P424532	Vnn1					0	1.925
A_51_P265374	Vnn3					0	2.315
A_66_P136186	Wee1	0	1.551
A_55_P2129488	Wfdc10					0.016	-1.508
A_52_P700056	Wfdc17					0.0322	1.887
A_51_P108226	Wfdc21					0.0126	1.786
A_55_P1994042	Zbp1					0	2.18
