# Supplementary material for: Single-Walled vs. Multi-Walled Carbon Nanotubes: Influence of Physico-Chemical Properties on Toxicogenomics Responses in Mouse Lungs
Source: Nanomaterials (Basel). 2023 Mar 15;13(6):1059. doi: 10.3390/nano13061059 (PMC10057402; doi:10.3390/nano13061059)
Supplement: Supplementary file 1 [file nanomaterials-13-01059-s001.zip › Table S5.xlsx]

## Sheet: a. NRCWE-051
Table S5. Upregulated and downregulated genes in mouse lung tissue after 1 day of exposure to NRCWE-051, NRCWE-052, NRCWE-053, and NRCWE-054.
Table S5a. Upregulated and downregulated genes in mouse lung tissue after exposure to NRCWE-051. FDR adjusted p-value ≤ 0.05 and fold change ≤−1.5 or ≥ 1.5.
		Low dose (6 µg/mouse)		Medium dose (18 µg/mouse)		High dose (54 µg/mouse)
Agilent ID	Gene Symbol	FDR adj p-value	Fold Change	FDR adj p-value	Fold Change	FDR adj p-value	Fold Change
A_51_P160083	1500035N22Rik	0.00518	-1.61	0.00754	-1.63	0	-1.898
A_55_P2083153	1700001J03Rik (Includes Others)					0	-1.552
A_66_P102628	1700016J18Rik					0.0276	-1.613
A_51_P191893	2410022M11Rik	0	-1.727	0	-2.026	0.0021	-1.52
A_55_P2054342	2810408I11Rik	0	1.597	0	1.609
A_52_P40504	2900052L18Rik			0	-1.625
A_66_P118579	3300002A11Rik					0.00708	-2.427
A_66_P126662	4732414G09Rik					0	-1.754
A_55_P2366358	4930444F02Rik					0	-1.597
A_66_P116860	5031434O11Rik			0	-1.558	0	-1.599
A_52_P458806	5430414B12Rik					0.0357	-1.653
A_55_P2097962	9030622O22Rik					0	-1.827
A_55_P2353462	9530036O11Rik					0	-1.582
A_52_P510202	9930014A18Rik	0	-1.604	0.00342	-1.557	0.000645	-1.521
A_55_P2116650	A130040M12Rik					0	1.905
A_55_P2178972	A430027H14Rik					0	-1.863
A_52_P665675	Abca1	0.00968	-1.649			0.00676	-1.636
A_55_P1953846	Abca8					0	-1.621
A_55_P2102769	Abca8a			0.0293	-1.534	0.00165	-1.653
A_51_P245368	Abcb1b					0	1.598
A_55_P1979814	Abcc8	0.0333	1.915
A_66_P101519	Abcc9					0.0153	-1.638
A_51_P222467	Abcg1	0.0345	-1.587	0.0253	-1.651	0.0145	-1.651
A_55_P2059640	Abhd14b					0	-1.518
A_55_P1979217	Abtb1	0	-1.517	0	-1.626
A_51_P125260	Acaa2					0	-1.66
A_52_P110052	Ackr1	0.0164	1.527			0	2.024
A_52_P153291	Ackr4	0.00452	-1.515	0	-1.681	0.000645	-1.667
A_51_P123625	Acod1					0.0121	2.523
A_51_P479321	Acss1					0.00443	-1.625
A_52_P420504	Acta2	0.0229	1.608	0.0163	1.671
A_55_P2028474	Adam22					0	-1.713
A_55_P2025765	Adam8	0.012	2.384	0.0054	2.741	0.00645	2.456
A_55_P2038422	Adamts17					0.00331	-1.596
A_55_P1955778	Adamts4	0.00306	1.842	0	2.246	0	3.624
A_51_P407417	Adamts9			0	1.789
A_55_P2151546	Adarb1					0.00253	-1.509
A_55_P2047305	Adcy5	0	-1.726	0.00493	-1.527	0	-1.677
A_51_P265571	Adm			0.00168	1.607	0	1.749
A_55_P1972605	Adora3	0.00126	2.072	0	2.371	0	3.268
A_55_P1992849	Adrb3	0.0288	-1.595	0.0458	-1.575
A_52_P330359	Agbl2					0.0479	-1.508
A_51_P510764	Agmo					0	-1.559
A_51_P209122	Agr2	0.0249	8.658
A_55_P2049717	Agrp					0.0101	-1.73
A_52_P162509	Ahcyl2	0	1.66			0	1.868
A_55_P2109613	Ahr			0	-1.508
A_52_P534583	Ahsp					0	3.423
A_51_P101006	Ak8					0.0227	-1.85
A_52_P639751	Akap14					0.0175	-1.974
A_51_P128987	Akr1b10					0.000645	1.562
A_55_P2083649	Alas1					0.000645	-1.88
A_51_P334942	Aldh1a1					0	-2.592
A_52_P87843	Aldh1a3	0	5.755	0	5.654	0	14.619
A_51_P338485	Aldh6A1			0	-1.556	0	-1.543
A_52_P151240	Alkal1	0.00383	1.671	0	2.274	0	2.587
A_51_P247249	Alox5	0.00222	-1.522
A_55_P2023523	Aloxe3					0	-1.557
A_51_P494125	Alpl			0	1.889	0.000645	1.706
A_51_P466221	Amhr2					0	-1.599
A_51_P338443	Angptl4			0.0266	2.05	0.0261	1.932
A_51_P220150	Angptl7			0.0166	-1.699
A_52_P120803	Ankrd1	0.0393	1.812	0.037	1.88
A_52_P284495	Ankrd33b					0.000645	-1.527
A_55_P2019447	Ano2					0	1.533
A_51_P333111	Aox1					0	-1.519
A_52_P16752	Aox3	0.00222	-1.518	0	-1.675	0	-1.81
A_52_P97572	Aplnr			0.000942	-1.829
A_55_P2178553	Apoa2					0.016	-1.848
A_55_P2093286	Apod			0.0405	1.979
A_66_P109183	Apold1			0.000942	1.5
A_51_P179907	Appl2					0.00253	-1.609
A_51_P245090	Aqp3					0.0158	2.669
A_52_P482897	Areg			0.00493	2.324	0.00117	2.408
A_51_P303160	Arg1	0.00306	3.572	0	6.228	0	6.799
A_52_P374897	Arg2	0.00126	1.729	0	2.111	0	1.895
A_51_P188772	Arhgef28					0	-1.527
A_55_P2125208	Arid5a	0	1.524	0	1.829	0	2.133
A_51_P437327	Ascl1					0	-1.57
A_55_P2003824	Asgr1	0.00222	-2.449	0.00231	-2.602	0	-3.796
A_55_P1959748	Asns					0	1.513
A_52_P452689	Atf3			0	1.555	0	1.917
A_55_P1979728	Atf4					0	1.531
A_52_P168097	Atp2a2	0.0111	1.687			0.00443	1.746
A_51_P256384	Atp2b2					0.011	-1.587
A_66_P124179	Atp6v0d2			0.0149	1.583	0.000645	1.706
A_55_P2274378	Aw549542			0.0132	-1.549
A_51_P456721	Azgp1	0.0306	-2.008			0.00369	-2.366
A_55_P2177463	B130024G19Rik			0	-1.619
A_55_P2110758	B430306N03Rik					0.0121	1.995
A_52_P277104	Bank1	0.0111	-1.591
A_51_P114616	Batf					0.000645	1.539
A_51_P419286	Batf3	0	1.846	0.000942	2.144	0	2.779
A_55_P2408355	Bb166591					0.00771	1.769
A_55_P1976494	Bbof1					0.00613	-2.339
A_55_P2121491	Bbs9					0	-1.501
A_55_P1971599	Bcan	0.00222	-2.344	0.00493	-2.245	0	-2.675
A_55_P2127825	Bcas3					0	-1.552
A_51_P466148	Bckdha	0	-1.546
A_52_P299771	Bcl2a1c	0.00915	1.541			0.000645	1.689
A_55_P2066116	Bcl3	0	1.61	0	2.02	0	2.403
A_51_P237668	Bex1	0.00306	-1.966	0.0132	-1.814	0.0021	-2.047
A_55_P1967683	Bex4			0.0291	-1.519
A_52_P340669	Bhlha15	0	3.038	0	2.81	0	3.249
A_51_P272553	Bhlhe40			0	1.601	0	1.735
A_52_P434055	Birc3					0	1.611
A_55_P2029106	Bmf	0	-1.533	0	-1.811	0	-1.56
A_55_P2162324	Bmx	0.00126	-1.665	0	-1.835	0	-1.708
A_55_P2091473	Bnip3					0	-1.539
A_51_P283876	Bphl					0.00708	-1.671
A_52_P343617	Bpifa2					0	1.639
A_55_P1957797	Bpifb1	0.0466	5.315
A_55_P2029013	Bpifb5	0	1.755			0.00369	1.626
A_55_P2124941	Brinp1			0.00627	1.514	0	1.684
A_55_P1964648	Btla	0.00222	-1.612	0.00231	-1.627
A_52_P131836	Bysl					0	1.606
A_52_P625270	C10orf53					0.0212	-2.366
A_66_P105032	C11orf96					0	1.65
A_51_P193686	C11orf97					0.0347	-2.068
A_55_P2311208	C130045F17Rik			0	-1.555	0	-1.551
A_55_P2137049	C15orf48	0	8.782	0	11.647	0	12.426
A_51_P520139	C15orf65					0.0123	-1.759
A_51_P198775	C1orf112			0	1.553
A_51_P340829	C1orf116			0	1.545	0	1.572
A_51_P169032	C1orf131					0	1.521
A_51_P351860	C1Qb	0.0348	1.517	0.00231	1.755	0.00479	1.645
A_55_P2151011	C1Qtnf7	0.0142	-1.622	0.00287	-1.91	0.00369	-1.734
A_51_P110301	C3	0	3.317	0	3.73	0	3.023
A_55_P2106106	C5ar2			0	-1.519
A_51_P234847	C5orf49					0.0466	-1.863
A_55_P2069470	C9orf24					0.0212	-2.221
A_55_P2156855	Ca13	0	1.824	0	1.962	0	2.172
A_51_P205390	Cabcoco1					0.0288	-1.586
A_51_P136792	Calcoco1					0.000645	-1.596
A_52_P367760	Calml4					0.0145	-2.012
A_51_P416419	Calr	0	1.552	0	1.706	0	1.625
A_55_P2039699	Camp					0.0311	3.885
A_51_P316042	Card11	0	-2.086	0	-1.96
A_55_P2104567	Casc1					0.00802	-2.278
A_55_P2091461	Casp4					0.00253	1.513
A_66_P102467	Casz1					0	-1.501
A_51_P277336	Cavin2					0.0178	-1.604
A_55_P2122604	Cbr2					0	-1.934
A_55_P2078670	Cbs/Cbsl	0.0146	-1.583			0.00165	-1.643
A_55_P2128929	Cc2d2a					0	-1.584
A_51_P398603	Ccdc150					0.00443	-1.837
A_66_P104365	Ccdc167	0	1.905	0	1.97	0	1.819
A_55_P2009498	Ccdc28a					0	-1.573
A_51_P490700	Ccdc40					0.0326	-1.761
A_51_P307741	Cckar					0.00407	-1.932
A_51_P114462	Ccl17	0	8.166	0	9.048	0	9.352
A_51_P286737	Ccl2	0	5.573	0	6.156	0	8.63
A_51_P140710	Ccl3l3	0	1.652			0	1.721
A_51_P509573	Ccl4	0.00583	2.69	0.0412	2.23	0.00894	2.469
A_51_P436652	Ccl7	0	11.788	0	13.617	0	18.776
A_51_P464703	Ccl8	0	5.783	0	8.219	0	4.884
A_51_P185660	Ccl9	0	2.455	0	3.206	0	2.489
A_51_P408946	Ccne1			0	1.509
A_51_P291501	Ccno					0.0326	-1.596
A_51_P245989	Ccr2					0.028	1.509
A_52_P578732	Ccr5	0	1.841	0.00584	1.714	0	2.028
A_55_P2125912	Cct6a					0	1.519
A_51_P172853	Cd14	0	2.402	0	2.818	0	2.885
A_55_P2181904	Cd164l2					0	1.526
A_55_P2079079	Cd19			0.00231	-1.558
A_55_P1960376	Cd209	0	3.164	0	2.981	0	3.572
A_55_P2055985	Cd209d	0	2.095	0.00287	1.955	0	2.12
A_51_P312035	Cd300e	0	-1.533
A_55_P2000224	Cd63	0	1.529	0	1.579	0	1.631
A_51_P181286	Cd69					0.0145	1.528
A_51_P342652	Cd79b	0.00222	-1.68	0.00231	-1.784
A_55_P1971951	Cd86					0	1.571
A_51_P267494	Cdc42ep3					0	-1.506
A_51_P125135	Cdca5			0.000942	1.566
A_51_P287100	Cdh16	0.00452	-1.926	0.0484	-1.659	0.0234	-1.688
A_55_P2050390	Cdh22					0.00894	-1.533
A_55_P2217831	Cdkl5			0.00711	-1.515
A_51_P363947	Cdkn1a	0	1.511	0	1.853
A_55_P1988183	Cdkn2b			0	-1.541
A_55_P2165869	Cebpb			0	1.555	0	1.558
A_51_P444447	Cebpd	0.00915	1.619	0	2.941	0	3.058
A_55_P2165839	Cebpe	0.0125	2.782	0.00444	3.39	0.00117	3.669
A_51_P492830	Cenph			0.00667	1.504
A_55_P2106150	Cenpk	0.00383	1.529	0	1.774
A_52_P329054	Cep70	0	-1.686	0.00584	-1.564	0	-2.086
A_51_P369784	Ces1e			0.0388	-1.575	0	-2.162
A_51_P178772	Ces1f					0.0425	-2.096
A_51_P253481	Ces1g					0.000645	-1.564
A_52_P627269	Ces2b	0	-1.875	0.000942	-1.947	0	-2.036
A_55_P1959500	Ces2e	0	-1.657	0	-2.041	0	-2.136
A_52_P345301	Cfap100					0.0218	-2.025
A_51_P430259	Cfap126					0.0494	-1.731
A_51_P160536	Cfap161					0.0225	-2.468
A_51_P247168	Cfap43					0.0379	-1.929
A_55_P2163498	Cfap44					0.0225	-1.645
A_51_P247393	Cfap46					0.0294	-1.711
A_55_P2063391	Cfap58					0.0121	-1.914
A_52_P340408	Cfap65					0.0294	-1.89
A_51_P413866	Cfb	0	1.875	0	2.164	0	1.935
A_51_P408363	Cfp			0.0142	1.756	0.00771	1.75
A_66_P137605	Cgas			0	1.539
A_51_P372550	Cgref1	0.00915	3.022
A_51_P196973	Chaf1a			0	1.608
A_55_P2085181	Chaf1b			0	1.527
A_55_P1978371	Chd5	0	-1.573	0	-1.593
A_52_P56636	Chia	0	2.143	0	2.204	0	1.966
A_66_P133397	Chil3/Chil4	0.00126	9.865	0.0153	5.356	0.00253	2.025
A_52_P441294	Chl1	0.0116	2.439	0	3.39	0	3.872
A_51_P305843	Chordc1	0	1.572
A_55_P2137010	Chrna7	0	1.766	0	1.96	0	2.511
A_52_P390944	Chst3	0	-2.045	0	-2.191	0.0165	-1.55
A_51_P277006	Chst8					0.0318	-1.643
A_55_P2120354	Cib2	0	-1.566
A_55_P1985001	Cirbp			0.00393	-1.863	0.00983	-1.674
A_51_P470715	Cish					0	1.775
A_52_P426768	Cited4			0.00342	1.522	0	1.687
A_51_P227004	Cks1b	0	1.652	0	1.844	0.000645	1.658
A_51_P422751	Clca1	0.0361	25.316
A_55_P1982291	Clca3a1/Clca3a2			0	1.931	0	2.186
A_52_P549190	Cldn8	0.0207	-1.645			0	-2.049
A_51_P182311	Clec2d (Includes Others)			0	-1.578
A_51_P383032	Clec4d					0.000645	1.877
A_52_P161488	Clec4e					0.00117	1.537
A_55_P2018061	Clec4m					0	1.769
A_51_P246653	Clec7a					0	1.729
A_55_P2142028	Clip4	0.037	1.689	0.00231	2.124	0	2.742
A_55_P2067608	Clmp	0.00306	1.549	0	1.873
A_55_P2100739	Cngb1			0	-1.732
A_52_P516409	Col4a6					0	-1.742
A_52_P302544	Col8a2					0.00708	-1.694
A_51_P174275	Colec11	0.0405	-1.547
A_51_P331429	Colgalt2	0.00126	-1.601			0.000645	-1.624
A_55_P2043337	Colq	0	-2.44	0	-2.872	0	-2.557
A_51_P161691	Coq7			0	1.504
A_55_P2151071	Cox7a2l	0	-1.506	0	-1.686	0	-1.594
A_55_P2111302	Cp			0.00627	2.802
A_51_P304397	Cpm	0	-1.65	0.00231	-1.654	0.00708	-1.536
A_51_P124345	Cpne5	0	-1.806	0	-2.07
A_51_P427674	Cpt1a					0	-1.737
A_51_P139108	Cpxm1	0.00222	1.818	0.000942	2.164	0	2.311
A_55_P2319468	Creb5	0	1.866			0	1.778
A_51_P122246	Creld2	0	1.894	0	1.853	0	1.906
A_51_P171075	Csf2	0.00126	1.794	0.0175	1.661
A_51_P146753	Csf2rb			0.00231	1.573	0	1.809
A_52_P604629	Csrnp1			0	2.169	0	2.419
A_55_P2038106	Cst8	0.00306	-2.093	0.0153	-1.87	0	-2.639
A_51_P284426	Cstad	0	-1.617
A_51_P114910	Cstb			0	1.517
A_51_P431737	Cth					0	1.553
A_51_P251357	Ctps1	0	2.36	0	2.385	0	3.183
A_52_P195839	Ctsc	0	1.567	0	1.562	0	1.628
A_52_P660945	Ctsf	0.00222	-1.608	0	-1.847
A_51_P416546	Ctsg					0.00741	1.915
A_55_P1961335	Ctsk	0	2.36	0	2.544	0	2.409
A_66_P122699	Cux2					0.000645	-1.568
A_55_P2007964	Cx3Cr1	0.00126	-1.546	0.00493	-1.577
A_55_P2016462	Cxcl10	0	6.059	0	6.31	0	6.402
A_55_P1966204	Cxcl12	0.00126	2.553	0	3.293	0	2.367
A_52_P232813	Cxcl3	0	2.707	0	2.811	0	3.1
A_55_P1990032	Cxcl6	0	19.672	0	23.263	0	17.821
A_55_P2103249	Cxcr1	0.00968	1.954	0.0194	1.89	0.047	1.682
A_52_P559975	Cxcr2	0.00915	1.587	0.000942	1.733	0	2.187
A_51_P324871	Cyb561a3	0	-1.619	0	-1.74	0	-1.528
A_51_P336827	Cyb5b					0	1.577
A_55_P2020153	Cycs	0	1.574	0	1.697	0	1.655
A_51_P501844	Cyp26b1	0.0221	-4.056
A_51_P453909	Cyp2f1					0	-1.726
A_51_P330044	Cyp2j9					0.00117	-1.516
A_55_P1966749	Cyp2s1					0.00253	-2.107
A_55_P2086143	Cyp39a1					0	-1.594
A_51_P136303	Cyp4f8					0.0212	-1.938
A_51_P461429	Cyp7b1	0	2.951	0	4.23	0	4.671
A_55_P2224830	D230044b12Rik			0	-1.524
A_55_P2334424	D630024d03Rik					0	-1.565
A_55_P2116924	Dbi			0.00342	1.569
A_55_P1997831	Dbndd1					0.00369	-1.79
A_55_P2032079	Dbp	0	-2.593	0	-2.933	0	-3.692
A_52_P640922	Dcdc2					0.00479	-1.616
A_55_P2005320	Dcstamp	0	1.535	0.000942	1.568	0	1.518
A_55_P2077628	Dcxr					0	-1.753
A_51_P216075	Ddost			0	1.507
A_55_P2161545	Ddx21			0	1.548	0	1.875
A_51_P316935	Depp1	0.00126	-1.872
A_55_P2020128	Dhrs3					0	-1.563
A_52_P223809	Dhx58	0.0356	1.527
A_55_P2158962	Dixdc1			0	-1.558	0	-1.576
A_51_P306017	Dll1			0.00168	1.818	0.00117	1.848
A_55_P2133405	Dmkn			0.00754	2.406
A_55_P2119907	Dnah11					0	-2.077
A_55_P2100968	Dnah7					0.0284	-2.061
A_55_P2025675	Dnah8	0.00452	-1.644	0.00287	-1.715
A_55_P2087984	Dnaja1	0	1.851	0	1.865
A_51_P153486	Dnajb1			0	1.853
A_51_P188073	Dnajb11	0	1.586	0	1.551	0	1.723
A_51_P450169	Dnajb13					0.0339	-1.568
A_55_P2040723	Dnali1					0.0282	-1.697
A_51_P446469	Dok2	0	2.008	0	2.151	0	2.667
A_55_P2067362	Dpep2	0	-1.504
A_51_P410650	Dpp9					0	1.607
A_51_P473259	Dpyd	0.00126	-1.814	0.000942	-1.845	0.00443	-1.684
A_52_P481279	Drc1					0.0411	-1.878
A_55_P2101757	Dscc1			0.0054	1.536
A_55_P2164534	Dtl	0.00383	1.693	0	2.179	0.0115	1.546
A_55_P2122648	Dtymk			0	1.505	0	1.576
A_52_P399934	Dusp2					0.0137	1.561
A_51_P259029	Dusp26	0.00126	-1.52	0.000942	-1.593	0	-1.731
A_66_P125035	Duxbl1 (Includes Others)					0	-1.631
A_55_P2302577	Dyrk1b	0	-1.544	0	-1.527	0	-2.015
A_51_P519108	Dzank1					0	-2.438
A_55_P2000833	E2f8			0.00627	1.538
A_52_P412585	Ear2 (Includes Others)	0.00126	-2.194	0.00287	-2.108	0.00117	1.934
A_55_P2131190	Echdc3			0	-1.603	0	-1.549
A_55_P2011912	Ecm2	0.00701	-1.523	0.00231	-1.639	0	-1.99
A_55_P2089710	Ednrb			0.0441	-1.549	0.0347	-1.505
A_51_P164420	Eef1e1	0	1.545	0	1.528	0	1.828
A_55_P2031167	Efna1			0.000942	-1.712
A_66_P112853	Eif1ax					0	1.525
A_55_P2085835	Elapor1					0.00863	-1.547
A_51_P480241	Elf3	0.0442	1.516	0.0122	1.692
A_51_P222359	Emilin1			0	1.613	0	1.684
A_52_P527800	Emilin2					0	1.783
A_55_P2002578	Ephx1	0	-1.703	0	-1.854	0	-2.016
A_55_P2074694	Ephx4					0.0451	-1.789
A_51_P161946	Epop	0.00126	-1.592	0.000942	-1.557
A_51_P435339	Epor	0.00126	-1.596	0.00231	-1.536	0	-1.872
A_55_P2096947	Ereg					0	1.963
A_55_P2016105	Errfi1					0.00613	1.702
A_55_P1997651	Espn	0	-1.591	0	-1.548
A_52_P195246	Esyt3	0	-1.88	0.00627	-1.56	0.0021	-1.618
A_66_P135185	Etv1					0	-1.527
A_55_P2037454	Etv5			0.00231	-1.533
A_51_P239984	Exo1	0.00583	1.568	0	2.158
A_51_P174961	F10	0	2.227	0	2.713	0	2.993
A_51_P507801	F13a1					0	1.581
A_55_P1971889	F3					0	1.911
A_51_P484054	F7					0	1.61
A_51_P487818	Fabp1	0	-6.993	0	-7.163	0	-7.046
A_55_P1953387	Fabp5			0.0132	1.546
A_55_P2042217	Fam161a					0.0104	-2.405
A_55_P2111825	Fam166c					0.0131	-2.595
A_55_P2054280	Fam178b			0.000942	-1.533	0	-1.704
A_51_P158678	Fam181b					0.000645	-1.561
A_55_P2033480	Fam205a					0.000645	-1.59
A_51_P389506	Fam220a	0.00518	1.53
A_55_P2043627	Fam89a	0.00126	-1.742	0	-1.874	0.0021	-1.676
A_51_P139184	Fank1					0.0453	-1.966
A_55_P2088615	Fbln5	0.0102	-1.591	0.00168	-1.774	0.00513	-1.579
A_55_P2078695	Fbxl13					0.00546	-1.827
A_51_P380078	Fcgbp	0.0336	3.475
A_52_P408757	Fcgr2a	0	1.657	0	1.773	0	2.095
A_51_P130095	Fcgr2b	0	2.104	0	2.298	0	3.076
A_51_P154485	Fcrla	0	-1.854	0	-1.876
A_55_P1966804	Fdps			0.00231	1.53	0.000645	1.51
A_51_P176086	Ffar2	0	1.975	0.00168	1.795	0	2.664
A_55_P1984830	Fgl1			0.0361	2.027	0.00253	2.464
A_52_P675039	Fhad1					0.000645	-1.598
A_55_P2011937	Fignl1	0	1.929	0	2.258	0.000645	1.742
A_55_P1981259	Fkbp14			0	1.552
A_55_P1952379	Fkbp5	0	2.087	0	2.129	0.00546	1.511
A_52_P644690	Flt3lg	0.00126	-1.621	0	-1.708	0	-1.862
A_51_P269404	Fmo3			0.041	-2.956	0	-6.035
A_55_P1959595	Fmo5	0	-1.732	0.00168	-1.641	0	-1.622
A_55_P2130178	Fn1	0.00126	1.551	0.000942	1.591	0.000645	1.562
A_51_P153423	Fndc1					0.0173	-1.504
A_66_P108267	Foxn4					0.0137	-1.699
A_51_P312485	Fpr1	0.00968	-1.916	0.00168	-2.126	0.00253	-2.107
A_51_P288138	Fpr2	0.00643	-1.842	0.00627	-1.843	0.00924	-1.734
A_52_P584188	Frat1			0	-1.736
A_55_P1971774	Fsip1					0.0276	-1.956
A_52_P466701	Fuom			0.00287	1.526
A_51_P445473	Fut7	0	-1.515	0	-1.603
A_55_P2069935	Fxyd2	0	-1.529	0.000942	-1.628
A_51_P315904	Gadd45g	0	1.874	0	2.206	0	2.627
A_51_P258281	Gal	0.0294	-1.682	0.0179	-1.816
A_55_P2111855	Gale	0	1.969	0	2.21	0	2.133
A_51_P462428	Galnt15	0.00306	-2.045	0.0277	-1.766
A_51_P461319	Gatm	0	2.538	0	2.865	0	3
A_55_P2106175	Gch1	0	1.679	0	1.863	0	1.884
A_51_P365019	Gclc	0	1.79	0	1.972	0	2.527
A_55_P2097478	Gda					0	1.659
A_55_P1960735	Gdf15	0	1.838	0	2.184	0	2.354
A_55_P2154252	Gfpt2			0.00168	1.764	0	2.072
A_52_P641758	Ggct					0	1.751
A_55_P2015232	Ggnbp2Os			0	-1.513
A_55_P2022399	Ghrl					0	-1.567
A_51_P337089	Gins1	0	1.614	0	1.971	0	1.598
A_52_P381303	Gins2			0.00168	1.521
A_52_P174915	Gja1					0	2.172
A_55_P2096967	Gjb1					0.0392	1.601
A_55_P1972381	Gjb4					0	1.9
A_52_P482251	Gjb6	0.00126	-1.642
A_55_P2338200	Glb1l2	0	-1.583			0	-1.619
A_51_P210395	Glrx					0	1.648
A_55_P2100620	Gm12216			0	-1.577
A_55_P1978895	Gm12814 (Includes Others)	0	-1.73	0.00168	-1.746
A_55_P2059323	Gm13315			0	1.54
A_55_P2148321	Gm15401			0	1.616	0	2.329
A_55_P1964965	Gm1673					0.0158	-1.627
A_55_P2119552	Gm2192	0.00755	-1.528
A_55_P2281818	Gm28856			0	1.591
A_55_P1961241	Gm32139					0	-1.732
A_51_P227445	Gm32819					0.0209	-1.563
A_55_P1973352	Gm3579	0	1.627	0	2.145	0	1.842
A_52_P222230	Gm43305			0.00287	2.429
A_55_P2133370	Gm4610					0	1.545
A_55_P2073024	Gm4841					0.011	1.798
A_52_P465129	Gm5150					0	1.986
A_55_P2055168	Gm6803					0	1.637
A_55_P2074927	Gm7932	0	1.507	0	1.785	0	2.036
A_55_P2035757	Gm8884					0	1.888
A_55_P2037697	Gm9733					0.00253	1.56
A_66_P124254	Gm9910	0.00222	-1.684	0	-1.849
A_51_P386810	Gmppb	0	1.709	0	1.661	0	1.663
A_51_P377376	Gnl3					0	1.553
A_55_P2108201	Gnptab					0	1.51
A_55_P1958434	Got1			0.00754	1.595
A_51_P153995	Gp9			0.0227	-1.566
A_51_P438967	Gpnmb	0	2.078	0	1.988	0.00292	1.677
A_52_P228551	Gpr176					0.00117	1.511
A_55_P2039684	Gpr34	0	-1.512	0	-1.582
A_51_P108459	Gpr65					0	1.518
A_55_P2044932	Gpr84	0.00915	1.675	0.00287	1.809	0	2.165
A_55_P2004213	Gprasp2	0	-1.755	0	-1.69	0.000645	-1.58
A_55_P2017694	Gprc5c					0.0359	-1.522
A_51_P368823	Grb7					0	-1.798
A_51_P152990	Grem2	0	-1.726	0	-1.768	0.000645	-1.536
A_51_P170758	Grwd1					0	1.617
A_51_P249193	Gsg1l	0.00306	-1.784	0.0315	-1.57	0.00924	-1.62
A_51_P503625	Gsta3			0.00493	-1.54	0.00117	-1.574
A_51_P112223	Gsta4					0.0139	-1.531
A_55_P2170454	Gsta5	0.00126	-2.309	0	-2.886	0	-4.826
A_65_P02177	Gstm4					0	-1.68
A_55_P2062190	Gstm5	0	-1.523	0	-1.588	0	-1.904
A_51_P516133	H1-2			0	-1.616
A_55_P2084631	H2ac11			0.00493	1.588
A_55_P2036813	H2bc5			0	-1.697	0	-1.646
A_55_P2074035	Haao	0	-1.632	0.00168	-1.572
A_51_P492456	Has1			0.0295	1.736	0	2.994
A_51_P181565	Hbegf			0.000942	1.526	0	1.967
A_51_P488739	Hcar2	0	2.694	0.0054	2.281	0.00117	2.298
A_55_P1983006	Hdac5			0	-1.521	0	-1.518
A_52_P263658	Hes2	0	-1.829	0	-2.079	0	-1.947
A_51_P355753	Hic1	0.0081	-1.503
A_52_P586004	Hk3			0.00444	1.57	0	1.754
A_51_P449325	Hla-doa	0	-1.636	0	-1.656
A_55_P2042600	Hlcs					0.000645	-1.51
A_55_P2090406	Hm13					0	1.669
A_55_P2032966	Hmgcs1					0.000645	1.536
A_55_P2109033	Hmgcs2	0	-2.006	0	-1.816	0	-2.428
A_51_P458778	Hpgd					0.00834	-1.537
A_55_P2043062	Hs3st6					0.000645	-2.358
A_52_P243599	Hsd17b12	0	1.519	0	1.562
A_55_P1997936	Hsd17b7					0	1.728
A_55_P2080151	Hspa2					0.0403	-1.558
A_55_P2076772	Hspa5	0	2.054	0	1.9	0	2.02
A_55_P2069721	Hspa8	0	1.606	0.00231	1.528
A_55_P2176963	Hsph1	0	1.788	0	1.838
A_55_P2100103	Htr7	0	1.56	0	1.633	0	1.637
A_51_P326043	Hydin					0.0175	-2.082
A_55_P2052563	Id1			0	1.523
A_55_P2028961	Idi1					0	1.526
A_55_P1962918	Ifi16	0.00518	2.582	0.00444	2.683	0	3.054
A_51_P490305	Ifi30					0	1.506
A_51_P487690	Ifi44	0.0431	1.606
A_55_P2146254	Ifitm1	0.00222	1.56	0.000942	1.584
A_51_P294555	Ifitm6	0.00452	-1.544
A_51_P367060	Ifrd1					0	1.715
A_66_P139546	Igfbp6	0.00518	-1.687	0.00393	-1.75
A_51_P266248	Ighv14-2			0	-1.526
A_51_P483576	Iglv1	0.0279	-1.654	0.0111	-1.828
A_55_P2327769	Il13ra2					0	1.688
A_51_P253732	Il17rd			0.000942	-1.527
A_52_P577384	Il18bp	0.00126	1.757	0	1.71	0	1.824
A_51_P212782	Il1b	0	2.033	0.00168	2.294	0	3.958
A_55_P2027737	Il1rl1					0	1.577
A_55_P1980796	Il2ra			0.00231	1.514	0	1.837
A_55_P1964960	Il33	0	3.631	0	3.564	0	7.125
A_55_P2087622	Il4I1	0	2.228	0	2.18	0.000645	2.089
A_55_P1997756	Il6	0	4.507	0	7.7	0	12.661
A_51_P239750	Inhba	0.00452	1.707	0.000942	1.796	0	2.239
A_51_P505696	Inpp5k	0	-1.502	0	-1.603
A_52_P622244	Insyn1					0	1.781
A_55_P2058240	Ipo5					0	1.552
A_55_P2021275	Iqca1					0.0427	-2.133
A_51_P115655	Iqcd					0.0153	-1.503
A_55_P2109445	Irf4					0	1.831
A_51_P346668	Irf5					0	1.529
A_51_P421876	Irf7	0.0125	1.942
A_52_P1092823	Irx1			0	1.618	0	1.526
A_55_P2103698	Isg15	0.00126	2.584	0.0139	2.125
A_51_P228658	Isyna1			0	1.749	0	1.828
A_52_P518922	Itga1			0	-1.51
A_55_P2040011	Itga7	0	2.271	0	2.749	0	3.15
A_51_P309920	Itga8	0	-1.511			0	-1.562
A_51_P303424	Itgax			0	1.558
A_55_P2060243	Itgbl1	0.0111	-1.704	0.0394	-1.597
A_55_P2077055	Itih4	0	2.042	0	2.201	0	2.265
A_66_P119869	Itln1	0.0133	5.063
A_51_P273609	Itpka					0	-2.36
A_51_P344346	Itprid1					0	-2.945
A_55_P2010912	Jak3			0	1.584	0	1.66
A_55_P1957880	Jpt2					0	1.567
A_55_P2070373	Kash5					0	-1.918
A_52_P130787	Kcna6			0.0179	-1.586	0	-2.08
A_55_P2081050	Kcnj13					0.000645	-1.613
A_55_P2090330	Kcnmb4					0	-2.477
A_51_P425962	Khdrbs3			0	1.622
A_51_P284442	Kiaa0895			0.00231	1.869	0.000645	1.875
A_51_P179258	Kif26b			0	-1.69	0	-2.019
A_55_P2069765	Kiss1					0	-1.645
A_51_P144264	Klf2					0.027	1.514
A_51_P479352	Klhdc9					0.00924	-1.885
A_55_P1962289	Klhl24			0	-1.779	0	-1.776
A_55_P2004562	Klra2	0	-1.646	0	-1.697
A_51_P176474	Kndc1					0.0259	-2.094
A_55_P2017347	Krtap11-1					0	1.507
A_51_P370458	Krtap17-1	0	-2.424	0.00962	-1.83	0	-3.076
A_51_P242166	Lap3	0	1.709	0	1.761	0	1.779
A_55_P2070869	Lcn2	0	3.861	0	4.191	0	3.591
A_55_P2012984	Ldha			0	1.531
A_51_P465281	Lgals1	0.00383	1.557	0	1.872
A_55_P2171116	Lgals3	0	1.669	0	1.755	0	1.687
A_51_P361830	Lgi2	0	1.779	0	2.196	0	1.915
A_55_P2033312	Lgi4			0.000942	1.537
A_55_P2152771	Lhfpl2	0	1.626			0	1.566
A_51_P285446	Lig1			0	1.542
A_55_P1957459	Lilrb4	0	1.917	0	2.023	0	2.453
A_55_P1984035	Litaf	0	1.552	0.000942	1.691	0	1.853
A_52_P10781	Lman1	0	1.59	0.000942	1.51	0	1.627
A_55_P1984259	Lncpint			0	-1.573
A_55_P2076462	Lnx1					0.0305	-1.825
A_51_P417251	Loc728392	0	-1.696	0.00667	-1.514	0	-1.657
A_51_P134452	Lpar3	0.0142	-1.65			0	-2.246
A_52_P577748	Lpxn					0	1.509
A_51_P346938	Lrg1					0.000645	1.518
A_52_P285470	Lrp2					0	1.776
A_55_P1960411	Lrrc23					0.00331	-2.492
A_51_P108108	Lrrc25					0.00802	1.593
A_51_P384673	Lrrc59	0	1.578	0	1.702	0	1.625
A_52_P347764	Lrrc74b					0.0234	-2.118
A_51_P392303	Lrrn3					0	-1.627
A_55_P2023181	Lsm2			0	1.52
A_51_P296487	Lss			0	1.559	0	1.745
A_51_P109449	Ltb4r			0.00881	1.546	0	1.856
A_55_P2015292	Ltc4s	0	-2.036	0.00393	-1.807	0.0243	-1.536
A_55_P1986306	Ltv1					0	1.516
A_55_P2087118	Ly6a (Includes Others)	0	5.836	0	6.448	0	3.288
A_55_P2141395	Ly6g6c					0.00292	-1.666
A_52_P686785	Lyve1					0.0147	1.619
A_55_P2090060	Mab21l3	0	1.909	0	2.002	0	2
A_51_P213030	Macrod1					0	-1.522
A_52_P495869	Mafb					0.000645	1.559
A_52_P608322	Maff			0	1.917	0	2.131
A_55_P2057070	Magix	0.00583	-1.511			0	-1.756
A_55_P2062642	Magt1	0	1.539
A_55_P2113160	Mal					0	1.615
A_55_P2077068	Malt1	0	1.502	0	1.715	0	2.078
A_51_P451458	Mamdc2	0.00222	-1.929	0.00839	-1.841	0.00676	-1.772
A_51_P418168	Manf	0	2.069	0	1.921	0	1.961
A_51_P302566	Maob					0	-1.509
A_55_P2255449	Map2k6	0	-1.529			0	-1.574
A_55_P2106039	Map3k6	0.00126	1.775	0	2.25	0.00292	1.64
A_52_P168449	Mapk11					0	1.525
A_51_P239203	Mapk13			0	1.627
A_55_P2067842	Marchf5					0	1.511
A_55_P2063626	Matk	0.00126	1.953	0	2.32	0	2.881
A_55_P2105843	Mbd1			0	1.778	0	2.147
A_51_P325856	Mcemp1			0.0239	-1.515
A_51_P158210	Mcm2	0.00126	1.514	0	1.728
A_51_P360492	Mcm6			0	1.589
A_55_P2078433	Mcoln2					0	1.797
A_55_P2016842	Me1			0.03	1.728	0.00369	1.894
A_51_P464918	Mefv			0.00584	2.019	0	2.948
A_51_P455997	Meg3	0.00383	1.834	0.0136	1.733	0.0058	1.71
A_55_P2076866	Megf6	0	-1.6
A_55_P2013336	Melk	0.00643	1.531	0	1.676
A_52_P355084	Metrnl					0	1.666
A_55_P2128969	Mettl27	0	-1.611			0	-1.58
A_55_P2110743	Mettl7a2/Mettl7a3			0	-1.528	0	-1.504
A_51_P279437	Mfsd2a			0.00168	2.799	0	2.905
A_51_P385697	Mgat3					0.0209	-1.842
A_55_P2175880	Mgst1					0.00443	-1.596
A_55_P2085335	Mia					0.00645	-1.624
A_55_P2336173	Mirg	0.00452	1.517			0	1.742
A_51_P255657	Misp3	0.0176	-1.577	0.00231	-1.874	0	-1.904
A_51_P157976	Mmab					0	1.509
A_55_P2024803	Mmp12	0	1.849	0.000942	1.787	0	2.024
A_51_P220062	Mmp15					0	-1.573
A_51_P255699	Mmp3	0	2.596	0	3.707	0	2.748
A_51_P423825	Morn1					0.00954	-1.709
A_55_P2044282	Mpp6	0	1.565	0	1.605	0	1.819
A_55_P1988108	Mrc1			0	1.692	0	2.084
A_55_P2139992	Mrps18b					0	1.559
A_55_P2101426	Mrps25			0	1.531
A_55_P2040485	Ms4a4a	0.0214	1.682	0.00168	2.036	0.0021	1.908
A_51_P193146	Ms4a6c					0.00894	1.547
A_52_P607128	Msr1					0	1.968
A_52_P423810	Mt1			0	2.576	0	3.643
A_51_P246317	Mt2	0	3.009	0	4.403	0	5.254
A_51_P202623	Mterf2			0	-1.539
A_52_P184149	Mthfd2			0	1.703	0	1.725
A_52_P450188	Mtmr4	0	1.562			0	1.557
A_51_P445487	Mturn			0.0295	-1.577
A_55_P2025687	Muc4	0.00701	2.377	0.000942	3.057	0.00741	2.247
A_51_P102883	Muc5ac	0.0324	3.877
A_51_P355943	Mvd					0	1.596
A_55_P2118441	Mx1	0.0188	2.332
A_51_P514085	Mx2	0.0102	2.006
A_51_P427476	Mxra8					0	-1.566
A_55_P2017826	Myb					0.00331	-2.148
A_55_P2013665	Mybpc2	0.00222	1.723	0	1.901	0	1.931
A_52_P108346	Myc					0	2.084
A_52_P282762	Myd88					0	1.703
A_51_P123920	Mydgf			0	1.642	0	1.607
A_55_P2088525	Myh10					0.00117	-1.518
A_55_P2093232	Myh7	0	-2.872	0	-2.992	0	-3.234
A_51_P324303	Mylip			0.000942	-1.552
A_51_P302520	Myom1	0.0445	1.87			0.0134	2.043
A_55_P2034067	Myom3	0	-1.701	0	-1.656	0	-1.503
A_52_P681557	Naaladl2					0.000645	-1.58
A_66_P106231	Nccrp1	0.0342	1.654
A_51_P407606	Ndc1			0	1.512
A_51_P208801	Ndufab1	0.00126	1.51	0	1.611	0	1.718
A_51_P347529	Nek5					0.0462	-2.041
A_55_P1958857	Nek6	0	1.639	0	1.634	0	1.934
A_55_P2157770	Neu2			0	-1.67	0	-1.972
A_55_P2035320	Nfil3	0	1.576	0	1.848	0	2.223
A_51_P454217	Nfkb2	0	1.532	0	1.655	0	1.928
A_51_P295192	Nfkbia			0	1.51	0	1.815
A_51_P235123	Nfkbie					0	1.522
A_55_P2132512	Ngef	0.00306	-1.519	0.00231	-1.544	0	-2.285
A_52_P236448	Ngfr					0.00479	1.62
A_55_P2100120	Nme1	0	1.545	0	1.751	0	1.731
A_55_P2016959	Nme2	0	1.548	0	1.723	0	1.562
A_55_P1966102	Nme5					0.0458	-2.181
A_55_P1956847	Nolc1					0	1.59
A_52_P622434	Nop16			0	1.544	0	1.509
A_51_P496751	Nop58			0	1.51	0	1.778
A_55_P2158741	Nos2					0	1.622
A_55_P2111907	Noxo1	0	3.447	0	4.191	0	3.293
A_51_P289889	Npnt					0.0353	-1.576
A_51_P223776	Nr1d1	0	-2.052	0	-3.089	0	-2.652
A_55_P2148534	Nr1d2			0	-1.665	0	-1.589
A_51_P239654	Nr4a1	0.0196	-1.791
A_55_P2003541	Nrcam	0.00518	1.555	0.00168	1.626	0.00117	1.624
A_51_P485756	Nts			0.0212	1.523
A_51_P193336	Nucb2			0.00627	1.512
A_66_P128702	Nup43			0.000942	1.5
A_52_P324754	Nupr2					0	-1.553
A_51_P292030	Nus1					0	1.606
A_51_P254262	Nxph3	0	-1.568			0	-1.57
A_55_P1998943	Oas1	0.0207	1.959
A_55_P2086433	Oasl	0.0356	1.654
A_51_P387123	Oasl2	0.00518	1.805	0.0236	1.693
A_51_P360004	Ocstamp			0	1.552	0	2.033
A_51_P422369	Odf3b					0.00741	-1.943
A_51_P295085	Ogn	0.0151	-1.577	0.00444	-1.696	0.0121	-1.551
A_55_P2125766	Ola1					0	1.563
A_55_P2124461	Olfr1033					0.00443	2.12
A_51_P141546	Orm1 (Includes Others)	0	4.905	0	6.876	0.00331	3.994
A_55_P1953454	Osbpl6					0	-1.957
A_51_P319460	Osmr			0	1.582	0	1.889
A_52_P592951	Ostc	0.00126	1.501			0	1.556
A_51_P115346	P2rx6					0	-1.563
A_52_P587738	P2ry2			0	1.65	0	2.049
A_55_P2039556	Pak6					0	1.522
A_55_P2049752	Pamr1	0.0466	-1.568	0.0428	-1.605
A_55_P1971025	Paqr6					0	-1.695
A_51_P165451	Pbld2			0	1.83
A_55_P2008599	Pc			0.0242	1.653	0.00834	1.69
A_55_P2064492	Pcmtd2					0	-1.509
A_51_P245789	Pcolce2	0.0301	-1.525	0.0149	-1.6	0.00331	-1.602
A_55_P2167269	Pcsk4					0	-1.526
A_55_P2187141	Pdcd1lg2					0	1.745
A_65_P01319	Pde4b			0.00493	1.628	0.0021	1.597
A_55_P2017982	Pde8b			0	-1.601	0	-1.561
A_55_P2131964	Pdia2					0.00645	-1.787
A_66_P129730	Pdia3	0	1.638	0	1.689
A_51_P328300	Pdia4	0	1.879	0	1.799	0	1.813
A_55_P2053491	Pdia6	0	1.711	0	1.678	0	1.757
A_55_P1970033	Per1			0.00287	1.975	0.0473	1.578
A_52_P167382	Pgap6					0	-1.567
A_51_P144581	Pgrmc1					0	-1.547
A_55_P2014500	Phf24	0	-1.775	0.00493	-1.536	0.00117	-1.572
A_55_P2083963	Phgr1					0.038	1.56
A_51_P195958	Phlda1			0	1.576
A_55_P2000284	Phox2a	0.00383	1.99	0.0054	2.004	0	3.616
A_51_P463428	Pik3Ip1			0	-1.695	0	-1.648
A_55_P2129348	Pilra	0.00968	-1.54
A_55_P1999902	Pip5k1a	0.00126	1.912	0	2.477	0	2.855
A_51_P381618	Pla1a					0	1.955
A_66_P139646	Pla2g4c			0.0424	1.761
A_55_P1961968	Plagl1			0.000942	-1.507	0	-1.812
A_52_P681310	Plaur			0	1.592	0	1.671
A_55_P1974567	Plch2					0.0107	-1.615
A_55_P1956593	Plekha4			0.0054	1.527
A_51_P375201	Plk3			0	1.639	0	1.801
A_55_P2060991	Plppr3	0	1.874	0	2.018	0	2.303
A_55_P2022211	Plxdc2					0.00117	-1.531
A_55_P1969615	Pnck					0	-1.704
A_51_P192589	Pno1			0.000942	1.536	0	1.61
A_51_P269687	Pole2			0	1.528
A_55_P2159949	Polr1e					0	1.615
A_51_P108659	Pon1	0.00915	-2.186	0.00287	-2.607	0	-3.263
A_51_P443508	Ppa1	0	1.84	0	1.954	0	2.042
A_51_P428372	Ppbp			0.02	-1.681	0.0139	-1.64
A_55_P2109263	Ppp1R14b			0	1.537	0	1.625
A_55_P2009673	Ppp1R14d			0.0107	2.33
A_55_P2026275	Ppp1R1b			0.0405	-1.674	0.00443	-1.889
A_52_P460791	Ppy					0.000645	1.591
A_51_P363400	Prg2					0.0173	1.627
A_55_P1954758	Prickle1			0	-2.066	0	-1.733
A_51_P168632	Prim1			0	1.529
A_55_P2055087	Prkar2b					0.00771	-1.508
A_52_P284889	Prkcz					0	-1.505
A_55_P1978226	Prkn					0	-1.761
A_51_P295967	Proc					0.0305	-1.78
A_51_P170959	Proz	0	2.438	0.000942	2.9	0	3.178
A_55_P1968895	Prph					0	1.729
A_52_P435561	Prr15l			0	1.51
A_51_P225793	Prr5l			0	-1.822
A_55_P2016193	Prxl2c			0	-1.521
A_55_P2041868	Ptafr	0.0304	1.628	0.0159	1.781	0.000645	1.941
A_51_P520718	Ptger3					0.00369	1.568
A_51_P207988	Ptger4					0	1.586
A_55_P1974189	Ptges	0.0151	1.519	0.00444	1.736	0	2.33
A_55_P1994309	Ptgir	0	1.737	0	1.822	0.000645	1.844
A_51_P444437	Ptgr1					0	-1.582
A_51_P279100	Ptgs1	0	1.949	0	2.177	0	3.172
A_51_P254855	Ptgs2			0	1.838
A_55_P2007871	Ptpdc1			0	-1.561	0	-1.528
A_66_P116098	Ptpn2					0	1.548
A_52_P605812	Ptrh1	0	1.563	0	1.6	0	1.782
A_55_P2115151	Pxylp1					0.000645	-1.584
A_55_P2053923	Rab17	0.0129	-1.502
A_51_P417854	Rab20					0	1.625
A_55_P1994927	Rab3Il1	0	1.662	0	1.979	0	2.206
A_52_P11441	Rab6b			0.000942	-1.612
A_51_P455946	Rac3					0	-1.693
A_51_P148105	Rad51	0.00126	1.578	0	2.049
A_51_P348665	Ramp1	0	-1.582	0	-1.642	0	-1.796
A_55_P2037116	Ran			0	1.542	0	1.587
A_51_P340699	Rasl11a			0.00393	1.536	0	1.622
A_52_P596592	Rassf9					0.0058	-1.528
A_55_P2059686	Rcc1					0	1.505
A_51_P433127	Rdm1	0	-1.607	0	-1.776	0	-1.69
A_51_P246677	Rec8					0.000645	-2.028
A_55_P2159575	Reep6					0.0058	-1.721
A_51_P389751	Relb			0	1.531	0	1.805
A_55_P1985410	Reps2			0.00754	-1.541
A_51_P257951	Retnla	0	2.276	0	2.226	0	2.271
A_51_P428360	Retnlb	0.00126	2.017	0.00584	1.955
A_52_P425839	Retnlg					0.0486	1.591
A_55_P2159807	Rfc4			0	1.637	0	1.595
A_51_P260683	Rgs1	0	2.179	0	2.322	0	2.402
A_55_P2000354	Rgs11					0	-1.804
A_55_P2109857	Rgs2	0.00126	-1.604	0	-2.284	0	-1.943
A_55_P2027117	Rgs3			0	-1.591	0	-1.511
A_52_P136782	Rgs5					0.00613	1.507
A_51_P400366	Rhbg					0.00546	-1.678
A_51_P241769	Rhce/Rhd					0.0212	1.819
A_52_P354123	Rhebl1			0	-1.641	0	-1.5
A_66_P126313	Rhof					0	1.565
A_51_P227392	Rhou	0	1.728	0	1.873	0	2.468
A_52_P69194	Rimkla					0	2.079
A_55_P2144526	Ripor2			0.00584	-1.515
A_51_P455338	Rnase2	0.00126	-2.003	0	-2.017	0.0205	-1.569
A_51_P237383	Rnase4			0.00493	-1.701
A_66_P124724	Rnf19b					0	1.625
A_55_P2083919	Robo2					0.0126	-1.508
A_51_P150763	Ropn1l					0.0223	-1.658
A_51_P375187	Rpf2					0	1.554
A_51_P379710	Rpn1	0	1.672	0	1.753	0	1.64
A_55_P2173982	Rrm2			0.00287	1.61
A_52_P527874	Rrp12					0	1.52
A_51_P186053	Rrp15					0	1.544
A_52_P579640	Rrs1			0	1.566	0	1.707
A_52_P670026	Rsad2	0	3.009	0.0408	2.017	0.0101	2.134
A_55_P2163659	Rspo3					0	1.574
A_51_P209930	Rtn2			0	-1.546	0	-1.87
A_51_P304170	Rtp4	0.0437	1.581
A_51_P419226	S100a14	0.00643	1.817	0.000942	2.188	0	2.521
A_51_P256827	S100a8					0.0123	1.701
A_52_P318673	Saa1	0	9.047	0	16.402	0	10.472
A_52_P404329	Saa2-Saa4			0.0253	1.527
A_51_P202498	Sar1a					0	1.596
A_55_P1959496	Sbno2			0	1.553	0	1.991
A_51_P418056	Sc5d					0	1.566
A_52_P682382	Scd			0.0348	1.529	0.00863	1.576
A_55_P2099594	Scd3			0.00999	1.617	0.0021	1.691
A_55_P1983858	Scel	0.0225	-1.662	0.00287	-1.95
A_51_P128575	Scgb1a1					0.00165	-1.514
A_52_P156775	Scgb1c1	0.0081	-1.666	0.00584	-1.716	0.000645	-1.955
A_55_P1963920	Scimp					0	1.673
A_51_P335460	Scin	0.00863	3.746
A_55_P2119772	Scn3a	0.00583	-1.713	0.00797	-1.805	0.000645	-1.821
A_51_P190254	Scrn1					0	-1.58
A_51_P234359	Sct			0.00393	1.52
A_55_P2232988	Scube2	0.0129	-1.643	0.00168	-1.958	0.00292	-1.722
A_51_P380432	Scx	0	-1.605	0	-1.938	0	-1.925
A_51_P280446	Sdf2l1	0	2.743	0	2.925	0	2.727
A_51_P194853	Sec14l4					0.000645	-1.533
A_55_P1962736	Sec23b			0	1.508
A_55_P2051962	Sec61b	0	1.532	0	1.618	0	1.511
A_55_P2155421	Sec61g	0	1.575	0	1.681	0	1.597
A_51_P470328	Selenop			0.00881	-1.58	0.00708	-1.535
A_51_P211854	Selp	0	1.814	0	1.91	0	2.771
A_52_P410765	Sema7a			0	1.616	0	1.685
A_51_P367298	Septin8			0.00287	-1.601	0.00117	-1.56
A_55_P2014284	Serpina11	0.0188	2.321			0.00253	2.712
A_51_P159453	Serpina3	0	2.836	0	3.392	0	2.924
A_55_P2104975	Serpina3g (Includes Others)	0	3.263	0	3.102	0	5.275
A_55_P2142222	Serpina3h	0.00583	1.614	0	1.978	0	2.062
A_55_P1993933	Serpinb1c	0	27.364	0	37.939	0	25.535
A_51_P468140	Serpind1	0	2.532	0	2.396	0	2.734
A_55_P2119257	Serpine1			0.000942	1.501	0	1.595
A_51_P287069	Serpinh1	0	1.563	0	1.653	0	1.639
A_51_P436878	Sertad1			0	1.597
A_66_P134428	Sfrp1			0.00342	1.589	0	1.652
A_52_P408690	Sft2d2					0	1.513
A_51_P487999	Sgo1			0.00393	1.524
A_66_P113490	Sh2b2					0	1.503
A_51_P496540	Sh2d1b	0	-1.516
A_51_P148037	Sh3pxd2b	0	1.563	0	1.757	0	1.787
A_51_P408649	Shisa2	0.00452	-1.59	0.00493	-1.567	0.000645	-1.726
A_55_P2112693	Sipa1l1					0.000645	-1.501
A_55_P2041095	Six4					0	-2.206
A_52_P513177	Sla					0	1.627
A_51_P173678	Slc10a6			0.00287	1.821	0.0195	1.54
A_55_P2143923	Slc13a2	0.00583	2.564	0.00584	2.685	0	3.402
A_51_P312336	Slc14a1			0	-1.618
A_55_P2394490	Slc16a7					0	-1.504
A_55_P1964752	Slc23a3	0.00452	1.633	0	2.035	0	1.967
A_51_P193173	Slc25a25			0	1.53	0	1.745
A_51_P224164	Slc26a4	0	18.453	0	18.24	0	19.994
A_55_P1958597	Slc27a3					0	1.672
A_51_P209319	Slc35b1	0	1.522	0	1.557	0	1.622
A_51_P501773	Slc35f3					0.000645	-1.577
A_52_P48569	Slc38a4	0.00643	-1.786			0.000645	-1.898
A_55_P2013760	Slc39a14	0	1.666	0	2.109	0	2.427
A_51_P299805	Slc46a3					0	-1.629
A_51_P196972	Slc4a1	0.039	2.091			0.0288	2.132
A_55_P2032548	Slc4a5			0.0188	-1.504	0	-2.012
A_52_P669128	Slc5a1	0	1.718	0	1.728	0	2.419
A_55_P1965030	Slc5a12					0.0058	-1.64
A_55_P2032916	Slc6a20	0	1.99			0.00292	1.766
A_51_P112734	Slc7a8	0.00126	1.789	0	1.824	0	1.919
A_51_P183812	Slfn12l					0.0131	1.749
A_52_P472324	Slpi					0.0021	2.189
A_66_P115236	Smim38	0.0196	-1.614			0	-2.417
A_52_P295104	Smim5					0.0225	-1.82
A_52_P537545	Smpd3					0	1.545
A_51_P153053	Smpdl3a			0	-1.605
A_51_P323521	Snx21			0	-1.539	0	-1.53
A_66_P116372	Soat2					0	1.507
A_51_P279606	Socs1	0	1.816	0.02	1.56	0	2.191
A_51_P474459	Socs3			0	1.842	0	1.967
A_55_P1953301	Sord	0	-1.723	0	-1.68	0	-2.227
A_52_P160955	Sox11			0.00922	-1.574
A_55_P2121608	Sox4			0	-1.565
A_51_P476018	Sox7					0.00292	-1.549
A_51_P404193	Sp5	0.00383	1.688			0.00165	1.802
A_55_P1979998	Spaca9					0.0286	-2.145
A_55_P2171764	Spag11b	0.0138	-1.792	0.000942	-2.153	0.0021	-1.976
A_55_P1965154	Spc25			0.00881	1.531
A_55_P2007249	Spdef	0.0359	2.414
A_55_P2181634	Spef2					0.0347	-2.065
A_51_P139678	Sprr1a	0	1.811	0	1.968	0	2.765
A_55_P2048855	Sprr2a3	0	6.26	0.00231	5.654	0.00117	5.249
A_55_P1975185	Sqle			0.0142	1.502	0.00513	1.538
A_55_P2002376	Srm	0	1.641	0	1.678	0	1.805
A_51_P375862	Srpk3	0.00126	-1.558	0	-1.542
A_52_P312398	Ssr3	0	1.568
A_52_P546090	Ssr4			0.00231	1.533
A_51_P301804	St3gal1					0	1.614
A_55_P1980308	Stap1			0	-1.54
A_55_P2044533	Stard9			0	-1.597
A_51_P484158	Steap1	0.00583	2.243	0.0136	2.111	0.00741	2.061
A_55_P2133315	Steap2	0	1.99	0	1.984	0	2.297
A_51_P143893	Steap4	0	2.244	0	3.305	0	2.794
A_52_P398925	Stfa2/Stfa2l1					0.00117	1.58
A_51_P240801	Sting1	0.00222	1.507	0	1.653	0	2.121
A_51_P511511	Stk33					0.00645	-2.473
A_55_P2033435	Stra6l			0.00711	1.555
A_55_P1977149	Susd6					0	1.627
A_55_P2073338	Syn1					0	1.529
A_55_P2052699	Synm					0.000645	-1.662
A_52_P197402	Tbc1d30					0	-1.516
A_55_P2051716	Tbx1					0.033	-2.262
A_52_P161297	Tcea3					0	-1.603
A_55_P1986421	Tcp11					0.00894	-1.615
A_51_P497317	Tcp11l2			0	-1.512
A_55_P1987196	Tcte3					0.0168	-1.951
A_55_P1979893	Tef			0.00231	-1.563	0	-1.786
A_51_P447976	Tent5c	0.0107	1.57
A_55_P2168168	Tex11					0.00292	-1.621
A_52_P175376	Tfcp2l1			0.00168	-1.509	0.000645	-1.521
A_52_P127925	Tfec					0.00165	1.591
A_52_P228236	Tfrc	0	1.66	0	1.738	0	1.772
A_51_P212754	Tgfbi			0	1.653	0	1.889
A_52_P627816	Tgm1	0	2.16	0	2.622	0	4.727
A_52_P134639	Tgoln2					0	1.637
A_51_P291417	Thbd					0.000645	-1.591
A_52_P54261	Tlcd4			0.00342	1.714
A_55_P2171406	Tm7Sf2			0	1.707
A_51_P189272	Tmcc3					0.000645	-1.523
A_55_P2229137	Tmem116					0	-1.546
A_66_P136064	Tmem132d	0.00306	-1.859			0.00292	-1.827
A_51_P422893	Tmem14a					0	-1.502
A_55_P1971962	Tmem176b	0	1.817	0	2.05	0	1.682
A_52_P707503	Tmem212					0.0112	-2.008
A_51_P401501	Tmem213	0	3.094	0	3.611	0	3.733
A_55_P2031133	Tmem220					0	-1.536
A_52_P139413	Tmem221					0	-1.558
A_52_P668984	Tmem243					0	1.684
A_51_P171107	Tmem35a					0.00165	-1.507
A_51_P401987	Tmem37					0	1.556
A_65_P10673	Tmem44			0.00287	-1.501	0	-1.571
A_51_P314285	Tmem86a	0	-1.546
A_55_P2177998	Tmprss13					0.0347	-1.51
A_52_P355169	Tnc					0	1.652
A_51_P385099	Tnf	0.00383	1.527
A_55_P2053838	Tnfaip3					0	2.01
A_55_P2147081	Tnfaip6	0	1.616	0	1.797	0	2.214
A_52_P151320	Tnfaip8l1			0.00231	1.504	0	1.67
A_51_P131408	Tnfrsf12a					0	1.68
A_55_P2082180	Tnfrsf9	0	4.594	0	4.346	0	3.716
A_55_P2018017	Tnfsf10			0.00287	-1.507
A_51_P257934	Tnfsf13b	0	1.642	0	1.844	0	2.201
A_55_P2197338	Tnfsf13os			0	1.561
A_51_P208240	Tnfsf14					0	1.657
A_55_P2010038	Tnfsf9			0	1.656	0	1.888
A_55_P2005549	Tnn	0.00968	-1.591			0	-2.238
A_51_P175580	Tp53Inp1					0	-1.5
A_52_P193555	Tp73					0.0488	-1.54
A_51_P343833	Traf1			0	-1.666	0	-1.761
A_51_P279062	Treml1			0.0104	-1.608	0.0112	-1.533
A_52_P177847	Tril	0	-1.558	0.00493	-1.53	0	-1.804
A_51_P417891	Trim10	0.0306	1.68			0.0438	1.596
A_52_P654703	Trim69			0	1.511
A_51_P105709	Trip13			0.00168	1.514
A_55_P1989061	Tsc22d3			0.0197	1.682
A_55_P2010386	Tspan32			0.00168	-1.5
A_51_P161929	Tspo2	0.0155	1.597
A_51_P257675	Tspyl4					0	-1.693
A_66_P122758	Tsr1					0	1.515
A_55_P2078428	Tstd1					0.0021	-1.907
A_55_P2186352	Ttc12					0.00676	-1.506
A_55_P2013371	Ttc29					0.0252	-1.893
A_52_P96748	Ttc30b					0.019	-1.576
A_66_P108059	Ttc39c			0	1.567
A_52_P1016836	Ttc6					0	-1.827
A_55_P2069425	Ttll3					0.0227	-1.516
A_51_P247542	Ttll6					0.00834	-2.099
A_55_P1987186	Ttll9					0.0284	-1.906
A_55_P2108837	Tuba1c	0	1.539	0	1.68	0	1.985
A_51_P490023	Tubb2a	0	1.511	0	1.543
A_55_P2034864	Tubb2b			0.0185	1.508	0.0058	1.526
A_51_P421140	Tubb6	0.00126	1.509	0	1.825	0	1.719
A_51_P351363	Tyms-ps			0	1.627
A_55_P2038247	Tyro3					0.0175	-1.73
A_51_P395921	Uchl4					0	1.63
A_51_P398878	Uck2	0	1.53	0	1.673	0	2.027
A_55_P1962404	Ugt1a6					0	-1.505
A_55_P2035286	Uhrf1	0	2.135	0	2.775	0	2.007
A_55_P2156425	Upk1a	0	-1.871	0	-1.882	0	-1.904
A_55_P2114953	Usp18	0.044	1.666
A_52_P127362	Vmp1	0	1.5	0	1.728	0	1.673
A_51_P424532	Vnn1	0.0275	1.576	0.0313	1.589
A_51_P265374	Vnn3	0.00383	1.688	0.000942	1.792
A_55_P2136906	Vpreb3					0.00983	-1.88
A_66_P139647	Vwa3a					0.038	-2.02
A_51_P139069	Wdr45	0	-1.549	0	-1.698
A_52_P529486	Wdr77					0	1.555
A_51_P372456	Wdr86					0.00546	1.625
A_55_P2129488	Wfdc10	0.0102	-1.876	0.00342	-2.171	0.00443	-1.907
A_52_P700056	Wfdc17	0.00126	2.002	0	2.331	0	2.54
A_51_P484526	Wif1					0.00802	-1.655
A_55_P2106911	Wnt1					0.00771	-1.569
A_55_P2126363	Wnt10b	0.0142	-1.519	0.00168	-1.776	0.00117	-1.62
A_55_P2004746	Xkrx	0	-1.587	0	-1.793
A_55_P1961567	Ypel3			0	-1.521
A_66_P139683	Zbp1	0.0221	1.874	0.00584	1.933	0.00117	1.916
A_55_P2024155	Zbtb16	0	3.293	0.0443	2.042
A_52_P469956	Zc3h6	0	-1.528	0	-1.571
A_55_P2097518	Zdhhc22	0.0434	1.902
A_55_P2076085	Zfp850	0.0448	1.571
A_55_P2053320	Zfr2					0	-1.53
A_51_P392967	Zmynd10					0.0104	-2.258
A_55_P2126950	Znf467					0	-1.686
A_51_P126626	Znf503			0	-1.56
A_51_P399853	Znf704					0	-1.547

## Sheet: b. NRCWE-052
Table S5. Upregulated and downregulated genes in mouse lung tissue after 1 day of exposure to NRCWE-051, NRCWE-052, NRCWE-053, and NRCWE-054.
Table S5b. Upregulated and downregulated genes in mouse lung tissue after exposure to NRCWE-052. FDR adjusted p-value ≤ 0.05 and fold change ≤−1.5 or ≥ 1.5.
		Low dose (6 µg/mouse)		Medium dose (18 µg/mouse)		High dose (54 µg/mouse)
Agilent ID	Gene Symbol	FDR adj p-value	Fold Change	FDR adj p-value	Fold Change	FDR adj p-value	Fold Change
A_51_P191893	2410022M11Rik					0.00179	-1.552
A_55_P2054342	2810408I11Rik					0	1.678
A_66_P116860	5031434O11Rik					0	-1.565
A_52_P665675	Abca1					0.0165	-1.606
A_52_P420504	Acta2					0.0424	1.564
A_55_P2038422	Adamts17					0.0137	-1.541
A_55_P2159555	Adamts4					0.0106	1.689
A_51_P286357	Adgre4			0	-1.502
A_55_P1972605	Adora3					0.00416	1.947
A_55_P1992849	Adrb3					0.0415	-1.582
A_52_P534583	Ahsp					0.0227	2.213
A_51_P331288	Akr1b7					0.0339	-1.546
A_52_P87843	Aldh1a3					0	3.262
A_51_P338485	Aldh6a1					0	-1.523
A_52_P151240	Alkal1					0.00696	1.62
A_51_P494125	Alpl					0.00416	1.537
A_51_P338443	Angptl4					0.0459	1.93
A_52_P16752	Aox3					0	-1.574
A_52_P482897	Areg					0.0336	1.944
A_51_P303160	Arg1					0.00608	3.557
A_52_P374897	Arg2			0.0252	1.641	0.00416	1.627
A_55_P2125208	Arid5a					0	1.529
A_55_P2003824	Asgr1					0.00179	-2.573
A_66_P124179	Atp6v0d2			0.0122	1.689	0.0248	1.536
A_51_P419286	Batf3					0.0052	1.675
A_55_P2408355	Bb166591			0.0192	2.028
A_55_P1971599	Bcan					0.00179	-2.418
A_52_P340669	Bhlha15					0	2.197
A_55_P2029106	Bmf					0.00179	-1.571
A_55_P2137049	C15orf48					0	6.231
A_51_P198775	C1orf112					0	1.584
A_51_P181451	C1qa					0	1.558
A_51_P351860	C1qb					0.00778	1.691
A_51_P110301	C3			0	1.969	0	2.743
A_55_P2156855	Ca13					0.0119	1.573
A_51_P316042	Card11					0	-1.582
A_55_P2078670	Cbs/Cbsl					0.0328	-1.5
A_66_P104365	Ccdc167					0	1.736
A_51_P114462	Ccl17			0	4.009	0	5.906
A_51_P286737	Ccl2					0	3.56
A_51_P436652	Ccl7			0.0417	2.877	0	7.883
A_51_P464703	Ccl8					0	5.556
A_51_P185660	Ccl9					0	2.341
A_51_P481920	Ccna2					0	1.638
A_51_P408946	Ccne1					0	1.513
A_52_P578732	Ccr5					0.00608	1.638
A_51_P172853	Cd14					0.018	1.854
A_55_P1960376	Cd209					0.0339	1.748
A_55_P2055985	Cd209d					0.0469	1.575
A_51_P125135	Cdca5					0	1.633
A_51_P287100	Cdh16					0.039	-1.69
A_51_P444447	Cebpd	0	1.806	0	2.62	0.00179	1.787
A_51_P492830	Cenph					0	1.645
A_55_P2106150	Cenpk					0	1.827
A_52_P329054	Cep70					0.00179	-1.505
A_51_P369784	Ces1e					0.0437	-1.541
A_51_P413866	Cfb					0	1.916
A_51_P408363	Cfp					0.0257	1.688
A_51_P196973	Chaf1a					0	1.597
A_55_P2085181	Chaf1b					0	1.574
A_55_P1978371	Chd5					0	-1.558
A_52_P56636	Chia			0.0417	1.714	0	1.871
A_51_P167292	Chil3/Chil4			0	2.068	0.0155	1.858
A_52_P441294	Chl1					0.0204	2.21
A_55_P2137010	Chrna7					0	1.681
A_52_P390944	Chst3					0.044	-1.52
A_51_P227004	Cks1b					0	1.814
A_51_P383032	Clec4d					0.015	1.628
A_55_P2043337	Colq					0.0165	-1.842
A_55_P2151071	Cox7a2l					0	-1.507
A_51_P124345	Cpne5					0.0112	-1.648
A_51_P139108	Cpxm1					0.00309	1.922
A_55_P2319468	Creb5					0	1.597
A_51_P171075	Csf2					0.0324	1.603
A_51_P146753	Csf2rb					0.00179	1.562
A_52_P604629	Csrnp1			0	2.129	0.0397	1.525
A_55_P2038106	Cst8					0.00416	-1.995
A_51_P114910	Cstb					0	1.526
A_51_P251357	Ctps1					0	1.81
A_52_P660945	Ctsf					0.00853	-1.595
A_55_P1961335	Ctsk			0	2.229	0	2.434
A_55_P2016462	Cxcl10					0.00608	4.25
A_55_P1966204	Cxcl12					0.00309	2.388
A_52_P232813	Cxcl3					0.00179	1.838
A_55_P1990032	Cxcl6			0.0252	4.27	0.00309	5.397
A_52_P559975	Cxcr2					0.0175	1.55
A_51_P501844	Cyp26b1					0.00309	-5.303
A_51_P461429	Cyp7b1					0	2.53
A_55_P2020128	Dhrs3					0	-1.56
A_52_P223809	Dhx58					0.0496	1.514
A_51_P306017	Dll1					0.0285	1.548
A_55_P2025675	Dnah8					0	-1.808
A_51_P446469	Dok2					0	1.845
A_55_P2101757	Dscc1					0.00309	1.504
A_55_P2164534	Dtl					0	2.094
A_55_P2000833	E2f8					0	1.704
A_55_P2004375	Ear2 (Includes Others)			0.0291	1.773	0.00778	-1.85
A_55_P2011912	Ecm2					0.00696	-1.525
A_51_P115005	Edn1					0.00309	-1.627
A_52_P527800	Emilin2					0.00985	1.557
A_55_P2002578	Ephx1					0	-1.539
A_55_P2016105	Errfi1			0.0291	1.96
A_55_P1997651	Espn					0.00309	-1.541
A_52_P195246	Esyt3					0	-1.726
A_51_P239984	Exo1			0.0291	1.571	0	2.129
A_51_P174961	F10			0	1.832	0	2.429
A_51_P484054	F7			0.0488	1.549	0.00179	1.602
A_51_P487818	Fabp1					0.019	-3.757
A_55_P2160910	Faim2					0	-1.613
A_55_P2088615	Fbln5					0.0137	-1.589
A_52_P408757	Fcgr2a					0.00309	1.65
A_51_P130095	Fcgr2b					0.00179	1.976
A_51_P154485	Fcrla			0.0252	-1.623
A_51_P176086	Ffar2			0.0252	1.77	0	2.077
A_55_P2011937	Fignl1					0	2.337
A_55_P1952379	Fkbp5			0	1.736	0.00853	1.545
A_51_P269404	Fmo3					0.043	-2.894
A_55_P2130178	Fn1					0	1.597
A_55_P2111855	Gale					0.00416	1.832
A_51_P462428	Galnt15					0.0418	-1.687
A_51_P461319	Gatm					0	2.247
A_55_P2106175	Gch1					0	1.612
A_55_P1960735	Gdf15			0.0192	1.533	0	1.536
A_51_P337089	Gins1					0	1.822
A_52_P381303	Gins2					0	1.541
A_52_P117352	Gja4			0	-1.601
A_55_P1973352	Gm3579			0.0192	1.504
A_55_P1986341	Gm4956					0.0472	-1.735
A_66_P124254	Gm9910					0.0194	-1.539
A_51_P386810	Gmppb					0	1.581
A_51_P438967	Gpnmb			0	2.006	0	1.835
A_55_P2044932	Gpr84					0.0452	1.52
A_55_P2004213	Gprasp2					0	-1.754
A_51_P503625	Gsta3					0.00179	-1.675
A_55_P2170454	Gsta5					0	-2.82
A_51_P516133	H1-2					0	-1.51
A_51_P270949	H1f5					0	2
A_55_P2084631	H2ac11					0.00179	1.757
A_55_P2099961	H2ac4					0	1.581
A_55_P2142251	H3c8					0	-1.525
A_51_P488739	Hcar2					0.039	1.859
A_51_P351970	Hells					0.00179	1.572
A_52_P263658	Hes2			0.0291	-1.501	0	-1.833
A_55_P2109033	Hmgcs2					0.0052	-1.69
A_55_P2076772	Hspa5					0.00608	1.507
A_55_P1962918	Ifi16					0.0411	2.012
A_51_P294555	Ifitm6			0.0122	-1.588
A_66_P139546	Igfbp6					0.0112	-1.651
A_52_P577384	Il18bp					0.00416	1.624
A_51_P212782	Il1b					0.00309	1.946
A_55_P2046064	Il22ra2					0.0324	-1.593
A_55_P1964960	Il33					0	2.187
A_55_P2087622	Il4I1					0.00923	1.74
A_55_P1997756	Il6					0	3.239
A_51_P162162	Inmt					0.018	-1.51
A_51_P421876	Irf7					0.0289	1.875
A_52_P1092823	Irx1			0	1.7
A_55_P2103698	Isg15					0.015	2.224
A_55_P2040011	Itga7					0.00179	1.994
A_55_P2060243	Itgbl1					0.0376	-1.583
A_55_P2077055	Itih4			0	1.838	0	2.118
A_51_P273609	Itpka					0.039	-1.708
A_55_P2004541	Klra7 (Includes Others)			0.0452	-1.636
A_51_P242166	Lap3					0.00416	1.522
A_55_P2070869	Lcn2			0	3.191	0	3.541
A_51_P465281	Lgals1					0	1.796
A_55_P2171116	Lgals3					0	1.576
A_51_P359636	Lgals3bp					0.00923	1.555
A_51_P361830	Lgi2					0	1.707
A_51_P285446	Lig1					0	1.606
A_55_P1957459	Lilrb4			0.0192	1.609	0	1.995
A_52_P669005	Lrat					0.00309	-2.764
A_51_P384673	Lrrc59					0	1.526
A_55_P2087118	Ly6a (Includes Others)			0	3.415	0	4.306
A_51_P418168	Manf					0	1.709
A_55_P2106039	Map3k6			0.0122	1.833
A_55_P2063626	Matk					0.00179	1.83
A_51_P158210	Mcm2					0	1.722
A_51_P360492	Mcm6					0	1.673
A_51_P464918	Mefv					0.0407	1.767
A_55_P2013336	Melk					0	1.825
A_55_P2063312	Mgll					0.0106	-2.16
A_51_P253803	Mki67					0.00416	1.634
A_55_P2024803	Mmp12					0.00416	1.636
A_55_P1988108	Mrc1					0	1.578
A_55_P2040485	Ms4a4a					0.00309	1.78
A_52_P607128	Msr1					0.0119	1.661
A_52_P423810	Mt1					0.0175	1.551
A_51_P246317	Mt2					0.00416	2.268
A_55_P2025687	Muc4					0.0137	2.245
A_55_P2013665	Mybpc2					0.00778	1.588
A_52_P108346	Myc					0	1.519
A_55_P2093232	Myh7					0.00179	-2.287
A_55_P2034067	Myom3					0	-1.639
A_51_P295192	Nfkbia			0	1.62
A_52_P236448	Ngfr					0.0373	1.517
A_55_P2100120	Nme1					0	1.641
A_55_P2016959	Nme2					0	1.532
A_55_P2111907	Noxo1			0	2.769	0	2.743
A_51_P254262	Nxph3					0	-1.632
A_55_P1998943	Oas1					0.0358	1.894
A_51_P387123	Oasl2					0.0155	1.764
A_51_P295085	Ogn					0.00179	-1.794
A_51_P141546	Orm1 (Includes Others)					0	7.134
A_51_P230098	Pbk					0	1.627
A_51_P245789	Pcolce2					0.00985	-1.595
A_51_P328300	Pdia4					0	1.616
A_55_P1970033	Per1			0	2.836
A_55_P2106454	Phf24					0.00179	-1.64
A_55_P1999902	Pip5k1a					0.0244	1.64
A_55_P2025820	Plcb4			0	1.934
A_55_P2060991	Plppr3			0	1.57	0	1.533
A_51_P108659	Pon1					0.0194	-2.108
A_51_P443508	Ppa1					0	1.732
A_51_P461779	Ppp2r2c					0.0155	-1.847
A_55_P1954758	Prickle1					0.00309	-1.503
A_51_P168632	Prim1					0	1.503
A_51_P170959	Proz			0	2.181	0.00608	2.063
A_55_P1974189	Ptges					0.0175	1.547
A_55_P1994309	Ptgir					0.00309	1.564
A_51_P279100	Ptgs1			0.0252	1.552	0	1.799
A_51_P254855	Ptgs2			0	1.688
A_55_P1994927	Rab3Il1					0	1.781
A_52_P11441	Rab6b					0.00309	-1.611
A_51_P148105	Rad51					0	2.002
A_51_P262340	Rbm3					0	1.573
A_51_P433127	Rdm1					0	-1.617
A_51_P257951	Retnla			0	2.26	0	2.438
A_51_P428360	Retnlb					0.0144	1.828
A_55_P2159801	Rfc4					0	1.675
A_51_P226269	Rgcc			0.0122	1.744
A_51_P260683	Rgs1					0.00179	1.555
A_55_P2109857	Rgs2			0	-1.639	0	-1.695
A_51_P455338	Rnase2					0.0132	-1.735
A_55_P2173982	Rrm2					0	1.735
A_51_P419226	S100a14					0.00608	1.886
A_52_P318673	Saa1					0	9.327
A_52_P156775	Scgb1c1					0.0415	-1.528
A_55_P2119772	Scn3a					0.018	-1.651
A_55_P2232988	Scube2					0.0125	-1.67
A_51_P380432	Scx					0.00923	-1.511
A_51_P280446	Sdf2l1					0	2.254
A_51_P211854	Selp					0	1.889
A_51_P159453	Serpina3			0.0122	2	0	2.784
A_51_P326191	Serpina3g (Includes Others)					0.00416	2.452
A_55_P1993933	Serpinb1c			0	10.809	0	27.531
A_51_P468140	Serpind1					0.0213	1.646
A_51_P487999	Sgo1					0	1.575
A_51_P148037	Sh3pxd2b					0	1.61
A_51_P204402	Shcbp1					0	1.635
A_51_P514319	Slc13a4					0.0185	-1.618
A_55_P1964752	Slc23a3					0.00309	1.68
A_51_P224164	Slc26a4			0	8.414	0	14.819
A_52_P48569	Slc38a4					0.0407	-1.575
A_55_P2013760	Slc39a14					0.00179	1.641
A_55_P2032548	Slc4a5					0.0119	-1.518
A_52_P669128	Slc5a1					0.00179	1.55
A_51_P112734	Slc7a8					0.00309	1.728
A_51_P323521	Snx21					0	-1.522
A_52_P160955	Sox11					0.00416	-1.616
A_55_P2121608	Sox4			0	-1.63
A_51_P476018	Sox7			0	-1.679
A_55_P2171764	Spag11b					0.0106	-1.88
A_55_P1965154	Spc25					0.00416	1.647
A_51_P139678	Sprr1a					0.00608	1.724
A_55_P2048855	Sprr2a3					0.00608	4.565
A_51_P143893	Steap4					0.00416	2.035
A_52_P228236	Tfrc					0	1.693
A_51_P212754	Tgfbi					0	1.835
A_52_P627816	Tgm1					0.0199	1.666
A_55_P1971962	Tmem176b					0	1.613
A_51_P401501	Tmem213					0	2.484
A_55_P2082180	Tnfrsf9			0	2.202	0	2.963
A_55_P1995205	Top2a					0.00179	1.564
A_51_P343833	Traf1					0	-1.642
A_51_P105709	Trip13					0	1.585
A_55_P1989061	Tsc22d3			0.0192	2.045
A_55_P2108837	Tuba1c					0.00179	1.526
A_51_P421140	Tubb6					0	1.613
A_51_P351363	Tyms-ps					0	1.538
A_55_P2035286	Uhrf1			0.0122	1.935	0	2.757
A_55_P2156425	Upk1a			0	-1.608	0	-1.86
A_51_P265374	Vnn3			0.0377	1.632	0.0112	1.612
A_51_P139069	Wdr45					0	-1.539
A_52_P700056	Wfdc17					0	2.579
A_51_P108226	Wfdc21			0.0341	1.992	0.0227	1.771
A_55_P2126363	Wnt10b					0.00179	-1.703
A_55_P1994042	Zbp1					0.00696	1.85
A_55_P2024155	Zbtb16			0.0341	2.558

## Sheet: c. NRCWE-053
Table S5. Upregulated and downregulated genes in mouse lung tissue after 1 day of exposure to NRCWE-051, NRCWE-052, NRCWE-053, and NRCWE-054.
Table S5c. Upregulated and downregulated genes in mouse lung tissue after exposure to NRCWE-053. FDR adjusted p-value ≤ 0.05 and fold change ≤−1.5 or ≥ 1.5.
		Low dose (6 µg/mouse)		Medium dose (18 µg/mouse)		High dose (54 µg/mouse)
Agilent ID	Gene Symbol	FDR adj p-value	Fold Change	FDR adj p-value	Fold Change	FDR adj p-value	Fold Change
A_51_P191893	2410022M11Rik	0.0401	-1.559	0	-1.659	0	-1.825
A_55_P2054342	2810408I11Rik					0	1.501
A_52_P40504	2900052L18Rik					0	-1.594
A_51_P123625	Acod1					0.0226	2.483
A_52_P420504	Acta2					0.0495	1.555
A_55_P1955778	Adamts4					0.00914	1.694
A_55_P1972605	Adora3					0.0141	1.8
A_51_P334942	Aldh1a1					0.0204	-1.7
A_52_P87843	Aldh1a3					0.00193	2.749
A_52_P151240	Alkal1					0.0237	1.521
A_51_P494125	Alpl					0	1.779
A_51_P338443	Angptl4					0.0267	2.014
A_52_P16752	Aox3					0	-1.752
A_52_P482897	Areg					0	2.93
A_55_P2125208	Arid5a					0	1.546
A_55_P2003824	Asgr1					0.00459	-2.267
A_66_P124179	Atp6v0d2					0.00459	1.647
A_51_P419286	Batf3					0	1.784
A_55_P2066116	Bcl3					0	1.581
A_51_P237668	Bex1					0.0461	-1.642
A_55_P2029106	Bmf					0	-1.545
A_55_P2137049	C15orf48					0	6.023
A_51_P198775	C1orf112					0	1.533
A_51_P351860	C1qb					0.0413	1.522
A_51_P110301	C3					0	2.964
A_55_P2156855	Ca13					0.00459	1.607
A_66_P104365	Ccdc167					0	1.773
A_51_P114462	Ccl17	0	2.571	0	3.978	0	6.062
A_51_P286737	Ccl2					0.00193	2.795
A_51_P436652	Ccl7					0	5.853
A_51_P464703	Ccl8					0	4.19
A_51_P185660	Ccl9					0	2.219
A_51_P481920	Ccna2					0	1.816
A_51_P408946	Ccne1					0	1.569
A_51_P172853	Cd14					0.00459	2.141
A_55_P1961943	Cd68					0	1.51
A_51_P125135	Cdca5					0	1.841
A_51_P444447	Cebpd	0	2.002	0.0187	1.784	0.00742	1.61
A_51_P492830	Cenph					0	1.559
A_55_P2106150	Cenpk					0	2.039
A_51_P369784	Ces1e					0.0147	-1.68
A_51_P413866	Cfb					0	1.897
A_51_P408363	Cfp					0.0242	1.694
A_51_P196973	Chaf1a					0	1.592
A_55_P2085181	Chaf1b					0	1.541
A_55_P1978371	Chd5					0	-1.517
A_52_P56636	Chia			0	1.808	0	1.929
A_51_P167292	Chil3/Chil4					0.00742	1.937
A_52_P390944	Chst3					0.017	-1.597
A_51_P227004	Cks1b					0	1.913
A_52_P549190	Cldn8					0.0252	-1.663
A_51_P383032	Clec4d					0.0107	1.672
A_52_P161488	Clec4e					0	1.519
A_55_P2142028	Clip4					0.0343	1.746
A_51_P139108	Cpxm1					0.00193	1.859
A_51_P122246	Creld2					0	1.585
A_52_P460957	Crem	0	1.519
A_51_P146753	Csf2rb					0.00193	1.6
A_51_P284426	Cstad	0	-1.655
A_51_P251357	Ctps1					0	1.936
A_52_P195839	Ctsc					0	1.511
A_55_P1961335	Ctsk			0	1.957	0	2.475
A_55_P2016462	Cxcl10					0.0159	3.524
A_55_P1966204	Cxcl12					0.0128	2.046
A_52_P232813	Cxcl3					0	2.268
A_55_P1990032	Cxcl6					0	14.099
A_55_P2103249	Cxcr1			0	2.603	0.00914	2.006
A_51_P461429	Cyp7b1					0	2.48
A_55_P2116924	Dbi					0	1.621
A_55_P1997831	Dbndd1					0.0446	-1.569
A_55_P2032079	Dbp			0	-2.759	0	-3.373
A_52_P640922	Dcdc2					0.0147	-1.563
A_51_P316935	Depp1					0.0147	-1.707
A_51_P306017	Dll1					0.021	1.605
A_55_P2087984	Dnaja1	0	1.582	0	1.557
A_51_P153486	Dnajb1			0	1.504
A_51_P446469	Dok2					0.0193	1.555
A_55_P2101757	Dscc1					0	1.798
A_55_P2164534	Dtl					0	2.27
A_55_P2000833	E2f8					0	1.809
A_55_P2157008	Ear2 (Includes Others)					0.0339	-1.806
A_55_P2011912	Ecm2					0.00193	-1.543
A_55_P1976127	Ect2					0	1.612
A_51_P115005	Edn1					0	-1.695
A_55_P2002578	Ephx1					0	-1.634
A_51_P161946	Epop					0	-1.607
A_51_P239984	Exo1					0	2.225
A_51_P174961	F10			0.0309	1.723	0	2.571
A_51_P484054	F7					0.00193	1.64
A_51_P487818	Fabp1					0.0153	-3.68
A_51_P130095	Fcgr2b					0.00562	1.685
A_51_P137604	Fcna					0.0417	1.997
A_51_P176086	Ffar2					0	2.025
A_55_P2011937	Fignl1					0	2.622
A_51_P269404	Fmo3					0.00193	-4.624
A_55_P2111855	Gale					0.00742	1.792
A_51_P461319	Gatm					0.00193	1.946
A_55_P2106175	Gch1					0.00335	1.568
A_51_P365019	Gclc					0.00656	1.532
A_55_P1960735	Gdf15			0	1.533	0	1.868
A_51_P337089	Gins1					0	1.962
A_66_P124254	Gm9910					0	-2.189
A_51_P438967	Gpnmb			0	1.943	0	1.902
A_55_P2044932	Gpr84					0.0128	1.636
A_55_P2170454	Gsta5					0	-2.658
A_55_P2062190	Gstm5					0	-1.5
A_51_P270949	H1F5					0.00335	1.932
A_55_P2084631	H2ac11					0	1.887
A_55_P2099961	H2ac4					0	1.665
A_52_P420466	H2ac7					0.00193	1.52
A_51_P492456	Has1					0.0128	1.86
A_52_P263658	Hes2					0	-2.017
A_55_P2076772	Hspa5					0	1.702
A_55_P2069721	Hspa8	0	1.536
A_55_P2176963	Hsph1	0.0266	1.71
A_66_P106497	Igkv8-30					0.0427	1.579
A_52_P577384	Il18bp					0.00459	1.58
A_51_P212782	Il1b					0	2.104
A_55_P1964960	Il33					0	2.252
A_55_P2087622	Il4I1					0.00914	1.742
A_55_P1997756	Il6					0	4.393
A_55_P2040011	Itga7					0	2.127
A_55_P2077055	Itih4					0	2.041
A_52_P130787	Kcna6					0.00193	-1.861
A_51_P144264	Klf2			0.0475	1.735
A_55_P2004541	Klra7 (Includes Others)					0.0153	-1.603
A_55_P2070869	Lcn2			0.0399	1.822	0	3.777
A_51_P465281	Lgals1					0.00193	1.725
A_55_P2171116	Lgals3					0.00193	1.574
A_55_P2152771	Lhfpl2					0	1.517
A_51_P285446	Lig1					0	1.578
A_55_P1957459	Lilrb4					0	1.791
A_55_P2087118	Ly6a (Includes Others)					0	4.578
A_55_P2141395	Ly6g6c					0.0352	-1.512
A_55_P2090060	Mab21l3					0	1.736
A_51_P418168	Manf					0.00193	1.658
A_51_P158210	Mcm2					0	1.865
A_51_P360492	Mcm6					0	1.692
A_51_P165704	Mcm7					0	1.504
A_55_P2016842	Me1					0.0115	1.844
A_55_P2013336	Melk					0	1.743
A_51_P253803	Mki67					0	1.844
A_51_P255699	Mmp3					0.0193	1.882
A_51_P246317	Mt2					0.029	1.907
A_52_P184149	Mthfd2					0	1.587
A_55_P2025687	Muc4					0.0204	2.179
A_55_P2013665	Mybpc2					0.00914	1.592
A_55_P2093232	Myh7					0.00562	-2.068
A_51_P424810	Ncapg2					0	1.651
A_51_P454217	Nfkb2					0	1.593
A_55_P2132512	Ngef					0.00193	-1.503
A_55_P2100120	Nme1					0.00193	1.512
A_55_P2111907	Noxo1					0	2.96
A_51_P223776	Nr1d1			0	-2.012	0	-2.387
A_52_P303891	Nr1d2					0	-1.716
A_51_P240453	Nusap1					0	1.698
A_51_P295085	Ogn					0.0175	-1.553
A_51_P141546	Orm1 (Includes Others)					0	5.64
A_51_P223709	Pask					0	1.592
A_51_P230098	Pbk					0	1.72
A_55_P2008599	Pc					0.00656	1.77
A_52_P423247	Pde4b	0.0266	1.653
A_51_P328300	Pdia4					0	1.592
A_51_P204442	Phf19					0	1.529
A_51_P195958	Phlda1					0	1.61
A_55_P2060991	Plppr3					0	1.632
A_51_P108659	Pon1					0	-2.57
A_51_P443508	Ppa1					0.00193	1.695
A_55_P2026275	Ppp1r1b					0.00459	-1.922
A_55_P1954758	Prickle1					0	-1.566
A_51_P168632	Prim1					0	1.536
A_55_P1974189	Ptges					0.0221	1.543
A_55_P1994309	Ptgir					0.00562	1.563
A_51_P279100	Ptgs1					0	1.79
A_51_P254855	Ptgs2					0	2.037
A_51_P290931	Ptprb					0.0221	-1.501
A_55_P1994927	Rab3Il1					0	1.567
A_51_P148105	Rad51					0	2.136
A_51_P348665	Ramp1					0.00562	-1.509
A_55_P2107155	Rasd2			0.0309	-1.517
A_51_P340699	Rasl11a			0	1.677	0	1.594
A_51_P257951	Retnla	0	1.838	0	2.014	0	2.322
A_55_P2159801	Rfc4					0	1.67
A_51_P260683	Rgs1			0.0399	1.532
A_55_P2109857	Rgs2	0	-1.566	0	-1.734	0	-1.691
A_51_P227392	Rhou					0	1.685
A_51_P455338	Rnase2					0.0237	-1.643
A_55_P2173982	Rrm2					0	1.836
A_51_P419226	S100a14					0.00991	1.783
A_52_P318673	Saa1					0	7.094
A_52_P156775	Scgb1c1					0.0311	-1.544
A_55_P2119772	Scn3a					0.0356	-1.561
A_51_P280446	Sdf2l1					0	2.277
A_51_P159453	Serpina3					0	2.506
A_51_P326191	Serpina3g (Includes Others)					0.00335	2.48
A_55_P1993933	Serpinb1c			0	10.091	0	23.083
A_51_P468140	Serpind1			0	2.001	0.00742	1.732
A_66_P134428	Sfrp1					0.00742	1.533
A_51_P487999	Sgo1					0	1.816
A_51_P148037	Sh3pxd2b					0.00193	1.536
A_51_P204402	Shcbp1					0	1.854
A_55_P2061278	Sik1	0.0401	1.535
A_52_P139650	Ska1					0	1.516
A_55_P1964752	Slc23a3					0.0121	1.618
A_55_P2046198	Slc25a25			0	1.512	0	1.684
A_51_P224164	Slc26a4	0	4.571	0	8.773	0	19.483
A_55_P2013760	Slc39a14					0.0121	1.503
A_55_P2032548	Slc4a5					0.0153	-1.504
A_51_P112734	Slc7a8					0.00193	1.698
A_55_P2172274	Smc2					0	1.513
A_51_P279606	Socs1					0.00459	1.675
A_55_P1953301	Sord					0	-1.588
A_51_P404193	Sp5					0.0181	1.642
A_55_P2171764	Spag11b					0.0134	-1.812
A_51_P513530	Spag5					0	1.573
A_55_P1965154	Spc25					0	1.915
A_52_P381484	Spon2					0	1.99
A_51_P139678	Sprr1a					0.0107	1.66
A_55_P2048855	Sprr2a3					0.00656	4.001
A_51_P143893	Steap4					0.0107	1.86
A_55_P2033435	Stra6l			0	1.667	0	1.597
A_55_P1979893	Tef			0.0399	-1.521	0	-1.855
A_55_P2168168	Tex11					0.00827	-1.625
A_65_P06446	Tfrc					0	1.645
A_51_P212754	Tgfbi					0.00335	1.548
A_52_P627816	Tgm1					0	2.107
A_55_P1971962	Tmem176b					0.00459	1.52
A_51_P401501	Tmem213					0	2.404
A_55_P2147081	Tnfaip6	0	1.52
A_55_P2082180	Tnfrsf9					0	2.982
A_51_P257934	Tnfsf13b					0.00193	1.609
A_55_P1995205	Top2a					0	1.754
A_51_P105709	Trip13					0	1.692
A_51_P421140	Tubb6					0	1.563
A_51_P351363	Tyms-ps					0	1.626
A_55_P2035286	Uhrf1					0	3.041
A_55_P2156425	Upk1a	0.0266	-1.515			0	-1.919
A_51_P265374	Vnn3					0.0147	1.61
A_52_P700056	Wfdc17					0	2.213
A_51_P108226	Wfdc21					0	2.154
A_55_P2126363	Wnt10b					0.00827	-1.534

## Sheet: d. NRCWE-054
Table S5. Upregulated and downregulated genes in mouse lung tissue after 1 day of exposure to NRCWE-051, NRCWE-052, NRCWE-053, and NRCWE-054.
Table S5d. Upregulated and downregulated genes in mouse lung tissue after exposure to NRCWE-054. FDR adjusted p-value ≤ 0.05 and fold change ≤−1.5 or ≥ 1.5.
		Low dose (6 µg/mouse)		Medium dose (18 µg/mouse)		High dose (54 µg/mouse)
Agilent ID	Gene Symbol	FDR adj p-value	Fold Change	FDR adj p-value	Fold Change	FDR adj p-value	Fold Change
A_51_P160083	1500035N22Rik			0	-1.681
A_51_P191893	2410022M11Rik			0.00204	-1.526
A_55_P2054342	2810408I11Rik			0	1.536	0	1.604
A_55_P2116650	A130040M12Rik					0	1.883
A_52_P665675	Abca1					0.00138	-1.748
A_55_P2102769	Abca8a					0.00944	-1.627
A_52_P420504	Acta2					0.0198	1.618
A_55_P2159555	Adamts4					0.00138	1.801
A_55_P1972605	Adora3			0.00465	1.899	0.0105	1.738
A_55_P1992849	Adrb3					0.0283	-1.596
A_51_P510764	Agmo					0	-1.558
A_51_P334942	Aldh1a1			0.0102	-1.805	0.00476	-1.816
A_52_P87843	Aldh1a3			0.0124	2.209	0.00138	2.632
A_51_P338485	Aldh6a1			0	-1.511	0	-1.556
A_51_P494125	Alpl			0	1.666	0	1.844
A_51_P338443	Angptl4					0.00668	2.21
A_52_P284495	Ankrd33b					0.00326	-1.532
A_51_P333111	Aox1			0	-1.573	0	-1.535
A_52_P16752	Aox3			0	-1.621	0	-1.724
A_52_P97572	Aplnr					0.0123	-1.553
A_52_P482897	Areg			0.0146	2.131
A_51_P303160	Arg1			0.0131	3.068	0.00839	3.133
A_52_P374897	Arg2			0.00343	1.72	0.00781	1.518
A_55_P2022181	Arvcf					0	-1.56
A_55_P2003824	Asgr1			0.00343	-2.434	0.0146	-2.043
A_66_P124179	Atp6v0d2			0.0085	1.641
A_51_P419286	Batf3			0.00932	1.637	0.00668	1.605
A_55_P1971599	Bcan			0.0178	-1.934	0	-2.461
A_52_P299771	Bcl2a1c			0.0085	1.518
A_52_P340669	Bhlha15			0.0124	1.791	0.00405	1.915
A_55_P2029106	Bmf			0	-1.593
A_55_P2124941	Brinp1			0	1.642	0.00326	1.545
A_55_P2137049	C15orf48			0	5.207	0	7.255
A_51_P198775	C1orf112			0	1.566	0	1.657
A_51_P351860	C1qb			0.0233	1.572	0.00668	1.625
A_55_P2151011	C1qtnf7					0.0183	-1.581
A_51_P110301	C3			0	2.863	0	3.021
A_55_P2156855	Ca13			0.0057	1.636	0	1.717
A_55_P2078670	Cbs/Cbsl			0.0131	-1.568
A_66_P104365	Ccdc167			0	1.829	0	1.83
A_51_P114462	Ccl17	0	2.587	0	5.006	0	6.488
A_51_P286737	Ccl2			0	3.038	0	3.303
A_51_P140710	Ccl3l3					0	1.548
A_51_P436652	Ccl7			0	6.131	0	7.487
A_51_P464703	Ccl8			0.00204	3.557	0	4.703
A_51_P185660	Ccl9			0	2.144	0	2.461
A_51_P481920	Ccna2			0	1.584	0	1.617
A_51_P408946	Ccne1					0	1.53
A_52_P578732	Ccr5			0.00465	1.679
A_51_P172853	Cd14			0.044	1.745	0.00326	2.093
A_55_P2055985	Cd209d					0.036	1.569
A_55_P2000224	Cd63					0	1.515
A_51_P125135	Cdca5			0	1.693	0	1.853
A_51_P287100	Cdh16					0.00781	-1.91
A_51_P133612	Cdt1					0	1.558
A_51_P444447	Cebpd			0	1.782	0.0109	1.536
A_55_P2165839	Cebpe			0.0385	2.444
A_51_P492830	Cenph			0	1.598	0	1.642
A_55_P2077263	Cenpk			0.00204	1.79	0	1.9
A_52_P329054	Cep70			0	-1.604
A_51_P369784	Ces1e			0.0228	-1.606	0.03	-1.564
A_51_P178772	Ces1f			0.0364	-2.285
A_52_P627269	Ces2b					0.00138	-1.807
A_55_P1959500	Ces2e					0	-1.684
A_51_P413866	Cfb			0	1.892	0	2.08
A_51_P408363	Cfp					0.0387	1.608
A_51_P196973	Chaf1a			0	1.554	0	1.74
A_55_P2085181	Chaf1b			0	1.504	0	1.637
A_55_P1978371	Chd5					0	-1.54
A_52_P56636	Chia			0.0178	1.595	0.00138	1.887
A_51_P167292	Chil3/Chil4					0	2.043
A_55_P2137010	Chrna7			0	1.819	0.0024	1.516
A_51_P229925	Chst7			0.027	-2.005
A_51_P227004	Cks1b			0	1.841	0	1.95
A_51_P383032	Clec4d					0.00995	1.639
A_52_P161488	Clec4e					0	1.52
A_51_P246653	Clec7a					0.00138	1.517
A_51_P331429	Colgalt2					0.00894	-1.501
A_55_P2043337	Colq			0.00932	-1.954	0.0024	-2.052
A_55_P2151071	Cox7A2l					0	-1.563
A_55_P2111302	Cp					0.0243	2.269
A_51_P124345	Cpne5			0.0324	-1.543	0.0187	-1.544
A_51_P139108	Cpxm1			0	2.02	0.00138	2.083
A_55_P2319468	Creb5			0	1.692	0	1.95
A_51_P171075	Csf2			0.0249	1.631
A_51_P146753	Csf2rb					0	1.529
A_52_P604629	Csrnp1			0.0265	1.56	0.00138	1.745
A_55_P2038106	Cst8			0.0233	-1.813	0.00405	-1.931
A_51_P251357	Ctps1			0	1.88	0	1.878
A_52_P195839	Ctsc			0	1.621
A_52_P660945	Ctsf					0	-1.773
A_55_P1961335	Ctsk	0	1.677	0	2.255	0	2.494
A_55_P2016462	Cxcl10			0.0213	3.346	0	5.108
A_55_P1966204	Cxcl12			0.00465	2.255	0	2.699
A_52_P232813	Cxcl3			0	2.101	0.0024	1.977
A_55_P1990032	Cxcl6			0	5.591	0	8.239
A_55_P2103249	Cxcr1	0	2.297	0.0166	1.886	0.00839	2.014
A_52_P559975	Cxcr2					0.0024	1.667
A_51_P461429	Cyp7b1			0	2.59	0	2.564
A_55_P1957733	Cysrt1			0.0415	1.706
A_55_P1997831	Dbndd1			0.0109	-1.71
A_52_P640922	Dcdc2			0.0138	-1.572	0.0167	-1.52
A_51_P306017	Dll1			0.0057	1.732
A_55_P2133405	Dmkn					0.0494	1.922
A_55_P2025675	Dnah8					0	-1.672
A_51_P496720	Dnmt3l			0	1.515	0	1.569
A_51_P446469	Dok2			0.00465	1.676	0	1.821
A_51_P473259	Dpyd			0.0433	-1.514	0	-1.97
A_55_P2101757	Dscc1			0	1.737	0	1.763
A_55_P2164534	Dtl			0	2.284	0	2.73
A_55_P2000833	E2f8			0	1.594	0	1.843
A_55_P2004375	Ear2 (Includes Others)			0	1.938	0.0142	-1.913
A_55_P2011912	Ecm2					0	-1.795
A_51_P115005	Edn1			0.00932	-1.509
A_55_P2089710	Ednrb					0.0198	-1.606
A_51_P222359	Emilin1			0	1.515
A_55_P2002578	Ephx1					0.00138	-1.553
A_66_P108003	Espn			0	-1.511
A_52_P195246	Esyt3			0	-1.704	0.00728	-1.55
A_51_P239984	Exo1			0	2.069	0	2.142
A_51_P174961	F10			0	2.156	0	2.397
A_51_P484054	F7			0.0109	1.507	0.0105	1.533
A_51_P487818	Fabp1					0.0335	-3.028
A_55_P2160910	Faim2					0.0024	-1.527
A_52_P369123	Fam189a2					0.00138	-1.545
A_55_P2043627	Fam89a					0.00326	-1.61
A_55_P2088615	Fbln5					0.00668	-1.582
A_52_P408757	Fcgr2a			0.0102	1.505
A_51_P130095	Fcgr2a			0	1.82	0	1.809
A_51_P154485	Fcrla			0.00343	-1.631
A_51_P176086	Ffar2			0	1.913	0	2.293
A_55_P2011937	Fignl1			0	2.469	0	2.523
A_55_P1952379	Fkbp5			0	1.772	0.00668	1.526
A_55_P2145506	Flt3lg					0	-1.656
A_51_P269404	Fmo3			0.00204	-4.384	0.00944	-3.55
A_55_P2130178	Fn1			0	1.614	0	1.545
A_55_P2111855	Gale			0.0359	1.562	0.00476	1.779
A_51_P462428	Galnt15			0.00343	-2.03	0.0024	-2.09
A_51_P461319	Gatm			0.0057	1.943	0.00138	2.074
A_55_P2106175	Gch1					0	1.545
A_55_P1960735	Gdf15			0	1.742	0	1.884
A_51_P337089	Gins1			0	1.842	0	2.084
A_52_P381303	Gins2					0	1.616
A_51_P227445	Gm32819			0.0449	-1.544
A_66_P118799	Gm5144			0.0178	-1.585
A_55_P2035757	Gm8884					0	1.608
A_51_P438967	Gpnmb	0	1.848	0	1.921	0	1.886
A_55_P2044932	Gpr84			0.0445	1.527	0.0109	1.656
A_55_P2004213	Gprasp2			0	-1.51	0.00138	-1.546
A_51_P503625	Gsta3			0.00204	-1.646	0	-1.745
A_55_P2170454	Gsta5			0	-2.476	0	-2.587
A_65_P02177	Gstm4					0	-1.516
A_55_P2062190	Gstm5			0	-1.623	0	-1.613
A_51_P516133	H1-2			0	-1.589
A_51_P270949	H1F5			0.00465	1.75	0	2.107
A_55_P2084631	H2ac11			0	1.728	0	1.734
A_55_P2099961	H2ac4			0.00204	1.571	0	1.562
A_51_P492456	Has1					0.0357	1.694
A_51_P488739	Hcar2			0.0342	1.911
A_51_P351970	Hells			0.00204	1.564	0.00138	1.565
A_52_P263658	Hes2			0	-1.805	0	-1.864
A_55_P2109033	Hmgcs2			0	-1.873	0	-1.763
A_51_P325836	Hpx					0.022	2.716
A_52_P243599	Hsd17b12					0	1.528
A_55_P2076772	Hspa5			0.00204	1.559	0.00138	1.645
A_55_P2052563	Id1			0	1.53
A_55_P1962918	Ifi16					0.0263	2.078
A_51_P294555	Ifitm6			0.0102	-1.506
A_52_P577384	Il18bp			0	1.678	0.0024	1.658
A_51_P212782	Il1b					0	1.979
A_55_P2046064	Il22ra2					0.0127	-1.674
A_55_P1964960	Il33			0.00204	2.029	0.0024	2.015
A_55_P2087622	Il4I1					0	1.916
A_55_P1997756	Il6			0.00343	2.81	0	4.565
A_51_P162162	Inmt					0.0114	-1.506
A_55_P2103698	Isg15					0.0187	2.098
A_51_P228658	Isyna1					0	1.527
A_55_P2040011	Itga7			0.0131	1.76	0.00138	2.266
A_55_P2060243	Itgbl1					0.00894	-1.69
A_55_P2077055	Itih4			0	1.886	0	2.148
A_51_P273609	Itpka			0.0131	-1.901
A_55_P2081050	Kcnj13					0.00138	-1.513
A_55_P2151209	Krtap19-3					0	1.513
A_55_P2070869	Lcn2			0	3.329	0	4.041
A_51_P465281	Lgals1			0	1.778	0	1.637
A_55_P2171116	Lgals3			0	1.608	0.0024	1.51
A_51_P361830	Lgi2			0	1.992	0.00138	1.698
A_55_P2152771	Lhfpl2			0	1.57
A_51_P285446	Lig1			0	1.578	0	1.759
A_55_P1957459	Lilrb4			0	1.75	0	1.965
A_51_P417251	Loc728392					0	-1.589
A_51_P134452	Lpar3			0.0397	-1.574
A_51_P346938	Lrg1					0	1.634
A_52_P285470	Lrp2					0	1.534
A_55_P2076941	Lrr1					0.00138	1.548
A_55_P2023181	Lsm2					0	1.525
A_55_P2087118	Ly6a (Includes Others)			0	4.6	0	5.366
A_55_P2141395	Ly6g6c			0.0201	-1.546
A_55_P2090060	Mab21l3			0.00343	1.514	0	1.534
A_51_P451458	Mamdc2					0.00138	-2.07
A_51_P418168	Manf			0.00204	1.587	0	1.543
A_51_P170807	Map3k6			0.0324	1.506
A_55_P2063626	Matk			0.0057	1.771	0.00138	1.896
A_51_P158210	Mcm2			0	1.763	0	1.896
A_51_P324934	Mcm3					0	1.534
A_51_P190111	Mcm5					0	1.615
A_51_P360492	Mcm6			0	1.644	0	1.775
A_51_P165704	Mcm7					0	1.511
A_55_P2013336	Melk			0.00204	1.682	0	1.798
A_51_P255657	Misp3					0.0175	-1.593
A_51_P253803	Mki67					0	1.597
A_55_P2024803	Mmp12			0.0085	1.572
A_51_P255699	Mmp3			0	2.357	0	2.765
A_55_P1988108	Mrc1			0.0057	1.503
A_52_P211956	Ms4a4c (Includes Others)					0.00405	-1.521
A_52_P423810	Mt1					0.00894	1.58
A_51_P246317	Mt2					0.00608	2.118
A_52_P184149	Mthfd2					0	1.564
A_55_P2025687	Muc4			0.0445	2.011	0.0155	2.15
A_55_P2013665	Mybpc2			0.0146	1.517
A_55_P2093232	Myh7			0.0195	-1.899	0.00405	-2.161
A_55_P2034067	Myom3			0	-1.56
A_51_P424810	Ncapg2			0	1.513	0	1.619
A_51_P454217	Nfkb2					0	1.501
A_55_P2100120	Nme1			0	1.526	0	1.637
A_55_P2016959	Nme2			0	1.541
A_55_P2111907	Noxo1			0	2.852	0	3.268
A_55_P2003541	Nrcam			0.00343	1.58
A_51_P519251	Nupr1			0	-1.553
A_52_P324754	Nupr2			0	-1.54	0	-1.575
A_51_P254262	Nxph3			0	-1.687	0	-1.51
A_51_P387123	Oasl2					0.0246	1.644
A_51_P295085	Ogn			0.00343	-1.66	0	-1.941
A_51_P141546	Orm1 (Includes Others)			0.00204	6.688	0	7.5
A_55_P2049752	Pamr1					0.0335	-1.593
A_51_P223709	Pask			0.00204	1.513	0	1.591
A_51_P230098	Pbk			0	1.691	0.00138	1.657
A_52_P667913	Pcdhga9					0.00668	1.589
A_51_P245789	Pcolce2					0.0159	-1.558
A_66_P129730	Pdia3			0	1.503
A_51_P328300	Pdia4			0	1.644	0.00476	1.501
A_55_P2053491	Pdia6					0	1.566
A_55_P1970033	Per1			0.00765	1.835
A_51_P204442	Phf19			0	1.532	0	1.535
A_55_P2106454	Phf24			0.00465	-1.524	0.00138	-1.567
A_55_P1999902	Pip5k1a					0.031	1.563
A_51_P381618	Pla1a					0.0246	1.564
A_55_P2060991	Plppr3			0	1.826	0	2.001
A_51_P415905	Pola1			0	1.622
A_51_P269687	Pole2			0	1.552	0	1.585
A_51_P108659	Pon1			0.00204	-2.756	0.0202	-2.061
A_51_P443508	Ppa1			0.00765	1.558	0.00138	1.673
A_52_P30451	Ppp1r3c					0	-1.55
A_51_P461779	Ppp2r2c					0.0366	-1.649
A_51_P168632	Prim1					0	1.58
A_51_P170959	Proz			0.0346	1.801	0.0109	1.979
A_51_P279100	Ptgs1			0	1.753	0	1.788
A_52_P605812	Ptrh1					0	1.546
A_55_P1994927	Rab3Il1			0	1.586	0	1.652
A_51_P148105	Rad51			0	2.052	0	2.151
A_55_P1991688	Rad51ap1					0	1.574
A_51_P348665	Ramp1			0.00204	-1.538	0.00326	-1.579
A_51_P433127	Rdm1			0	-1.568	0	-1.645
A_51_P257951	Retnla	0	1.897	0	2.202	0	2.412
A_55_P2159807	Rfc4			0	1.56	0	1.551
A_51_P260683	Rgs1					0	1.854
A_51_P455338	Rnase2					0.00138	-1.809
A_51_P237383	Rnase4					0.00839	-1.622
A_51_P111164	Rnd1					0	-1.626
A_55_P2009217	Rnu3b1					0	1.649
A_51_P379710	Rpn1			0	1.51	0	1.634
A_55_P2173982	Rrm2			0	1.615	0	1.828
A_51_P419226	S100a14			0.0109	1.785	0.00138	1.918
A_52_P318673	Saa1			0	9.278	0	14.894
A_51_P129464	Scd2					0.00326	-1.512
A_52_P156775	Scgb1c1			0.0233	-1.606
A_55_P2119772	Scn3a					0.00781	-1.702
A_55_P2232988	Scube2					0.0246	-1.594
A_51_P280446	Sdf2l1			0.00204	2.118	0	2.25
A_51_P211854	Selp					0.0155	1.549
A_51_P159453	Serpina3			0	2.441	0	2.734
A_55_P2104975	Serpina3g (Includes Others)			0.0138	2.166	0.00995	2.182
A_55_P1993933	Serpinb1c	0	8.117	0	16.14	0	20.996
A_51_P468140	Serpind1	0	1.914	0.00677	1.789	0.0331	1.544
A_51_P436878	Sertad1			0	1.506
A_51_P487999	Sgo1			0.00204	1.601	0	1.614
A_51_P148037	Sh3pxd2b			0	1.606	0	1.511
A_51_P204402	Shcbp1			0.00204	1.597	0	1.725
A_51_P408649	Shisa2					0.00138	-1.608
A_55_P2041095	Six4			0.0218	-1.821
A_51_P514319	Slc13a4					0.00608	-1.745
A_55_P1964752	Slc23a3			0.00677	1.689	0.00839	1.585
A_51_P224164	Slc26a4			0	10.163	0	16.292
A_51_P209319	Slc35b1					0	1.513
A_55_P2058117	Slc35d1					0	1.501
A_55_P2013760	Slc39a14					0.00138	1.626
A_51_P112734	Slc7a8			0	1.834	0	1.782
A_52_P472324	Slpi					0.0175	1.958
A_55_P2172274	Smc2					0	1.529
A_66_P115236	Smim38			0.0342	-1.57
A_51_P323521	Snx21					0	-1.513
A_51_P476018	Sox7					0	-1.613
A_55_P2171764	Spag11b			0.0309	-1.729	0.0024	-1.945
A_55_P1965154	Spc25			0	1.703	0	1.884
A_52_P381484	Spon2	0	-2.08
A_51_P139678	Sprr1a					0.00405	1.665
A_55_P2048855	Sprr2a3			0.0131	3.668	0.0357	3.002
A_55_P2133315	Steap2					0.0213	1.525
A_51_P143893	Steap4			0.0102	1.913	0.00405	1.861
A_55_P2033435	Stra6l			0.0057	1.554
A_52_P348847	Stxbp4			0.0259	1.63
A_51_P273538	Syce2			0	1.501
A_51_P450527	Tagln					0.0209	1.701
A_55_P2063336	Tedc1					0	1.575
A_52_P127925	Tfec			0.00343	1.584
A_52_P228236	Tfrc			0	1.586	0	1.695
A_51_P212754	Tgfbi			0.00204	1.561	0	1.708
A_52_P627816	Tgm1			0.0159	1.701	0.00894	1.744
A_55_P1971962	Tmem176b			0	1.552	0	1.638
A_51_P401501	Tmem213			0.00932	2.074	0.00405	2.102
A_55_P2177998	Tmprss13			0.0131	-1.677
A_51_P385099	Tnf			0	1.629
A_55_P2082180	Tnfrsf9			0	2.912	0	3.194
A_51_P257934	Tnfsf13b			0.00343	1.553
A_55_P1995205	Top2a					0	1.581
A_51_P343833	Traf1					0	-1.578
A_52_P177847	Tril					0	-1.598
A_51_P105709	Trip13			0	1.597	0	1.758
A_55_P2108837	Tuba1c					0	1.58
A_51_P421140	Tubb6			0	1.507	0	1.678
A_51_P351363	Tyms-ps			0	1.631	0	1.607
A_51_P398878	Uck2					0	1.541
A_55_P2035286	Uhrf1			0	2.897	0	3.183
A_55_P2156425	Upk1a			0	-1.865	0	-1.857
A_51_P424532	Vnn1					0.0395	1.535
A_51_P265374	Vnn3			0	1.871	0.00138	1.89
A_55_P2145496	Wdr45			0	-1.501	0	-1.562
A_55_P2129488	Wfdc10					0.0441	-1.612
A_52_P700056	Wfdc17			0.0254	1.65	0	2.262
A_51_P108226	Wfdc21			0.0249	1.764	0.0183	1.781
A_51_P484526	Wif1			0.0233	-1.593
A_55_P2126363	Wnt10b			0.0172	-1.511	0.00608	-1.625
A_55_P1973447	Ybx2					0.00326	1.555
A_55_P1994042	Zbp1					0.00544	1.842
A_55_P2024155	Zbtb16	0	2.804
