# Supplementary material for: Single-Walled vs. Multi-Walled Carbon Nanotubes: Influence of Physico-Chemical Properties on Toxicogenomics Responses in Mouse Lungs
Source: Nanomaterials (Basel). 2023 Mar 15;13(6):1059. doi: 10.3390/nano13061059 (PMC10057402; doi:10.3390/nano13061059)
Supplement: Supplementary file 1 [file nanomaterials-13-01059-s001.zip › Table S6.xlsx]

## Sheet: a. NRCWE-061
Table S6. Upregulated and downregulated genes in mouse lung tissue after 1 day of exposure to NRCWE-061, NRCWE-062, NRCWE-063, and NRCWE-064.
Table S6a. Upregulated and downregulated genes in mouse lung tissue after exposure to NRCWE-061. FDR adjusted p-value ≤ 0.05 and fold change ≤−1.5 or ≥ 1.5.
		Low dose (6 µg/mouse)		Medium dose (18 µg/mouse)		High dose (54 µg/mouse)
Agilent ID	Gene Symbol	FDR adj p-value	Fold Change	FDR adj p-value	Fold Change	FDR adj p-value	Fold Change
A_55_P2743230	1500004A13Rik					0.005	-1.508
A_55_P2723826	1600029I14Rik					0.0189	-1.85
A_66_P111154	1700066B19Rik					0	1.932
A_51_P474015	3300002A11Rik					0.00642	-1.784
A_52_P209277	4921507G05Rik			0.0364	2.107	0	2.657
A_66_P133257	9530026P05Rik					0	-1.852
A_52_P665675	Abca1					0	-1.636
A_51_P379385	Abca8a					0	-1.545
A_51_P123625	Acod1					0	1.845
A_51_P451574	Acot1					0	-2.033
A_51_P268154	Acsl4					0	1.68
A_55_P2159555	Adamts4					0	1.971
A_55_P2717822	Adamts9			0.0128	1.56	0	2.344
A_52_P23674	Adgrf3					0.00906	-1.566
A_55_P1972605	Adora3					0	2.029
A_55_P1992849	Adrb3					0.0208	-1.888
A_51_P400543	Aif1					0.0016	1.553
A_51_P101006	Ak8					0.0384	-1.523
A_51_P111335	Akr1c19					0	1.655
A_51_P334942	Aldh1a1					0	-1.958
A_52_P87843	Aldh1a3			0.0078	1.907	0.00224	1.748
A_66_P130688	Aldh2					0	-1.566
A_55_P2101216	Aldh3a1					0.0242	-1.801
A_51_P338485	Aldh6a1					0	-1.691
A_55_P2054300	Alg8					0	1.559
A_51_P494125	Alpl					0	1.615
A_55_P1983418	Amy2a					0.0275	-2.006
A_52_P284495	Ankrd33b					0	-1.549
A_51_P333111	Aox1					0	-1.619
A_52_P16752	Aox3					0	-1.706
A_55_P2093286	Apod					0.03	1.602
A_51_P303160	Arg1					0	3.972
A_52_P374897	Arg2					0	1.924
A_55_P2125208	Arid5a					0	1.745
A_55_P2505115	Armc2					0.0102	-1.68
A_55_P2003824	Asgr1					0	-2.459
A_52_P624168	Atad2					0	1.517
A_66_P124179	Atp6v0d2			0	1.793	0.00224	1.637
A_51_P456721	Azgp1					0	-1.777
A_55_P2902743	Azin1					0	1.506
A_55_P2110758	B430306N03Rik					0.0016	1.913
A_66_P125844	Bard1					0	1.612
A_51_P419286	Batf3					0	1.73
A_55_P1976494	Bbof1					0.0386	-1.688
A_55_P1971599	Bcan					0.034	-1.548
A_52_P299771	Bcl2a1c			0.0128	1.572	0	1.806
A_51_P309307	Bcl2l15					0	1.646
A_51_P237668	Bex1					0	-1.549
A_52_P340669	Bhlha15					0	2.266
A_51_P272553	Bhlhe40					0	1.615
A_66_P104917	Bpifa2					0	1.542
A_51_P475523	Brca1					0	1.657
A_55_P2124941	Brinp1					0	1.747
A_52_P625270	C10orf53					0.0315	-1.721
A_55_P2865283	C11orf88					0.028	-1.809
A_55_P2137049	C15orf48	0	2.584	0	2.983	0	7.732
A_51_P305213	C17orf58					0	-1.763
A_51_P198775	C1orf112					0	1.649
A_51_P308446	C1orf189					0.0266	-1.643
A_51_P351860	C1qb					0.00448	1.77
A_55_P2151011	C1qtnf7					0	-1.551
A_51_P384318	C1r					0	1.501
A_55_P2038525	C3	0.0439	1.922	0	2.005	0	3.108
A_55_P2133365	C9orf24					0.0453	-1.628
A_52_P367760	Calml4					0.011	-1.608
A_51_P416419	Calr					0	1.565
A_55_P2104567	Casc1					0.0266	-1.685
A_52_P679769	Cat					0	-1.548
A_55_P2122604	Cbr2					0	-1.532
A_66_P104365	Ccdc167					0	1.774
A_55_P2869822	Ccl11					0	1.679
A_51_P114462	Ccl17	0.0299	2.788	0	4.388	0	5.141
A_52_P249514	Ccl2			0.0078	1.779	0	2.635
A_52_P249514	Ccl2
A_51_P286737	Ccl2					0	2.45
A_51_P408595	Ccl20			0	2.211
A_52_P18116	Ccl24			0	4.616	0	13.096
A_51_P509573	Ccl4					0	2.25
A_51_P436652	Ccl7			0.0128	2.286	0	5.139
A_51_P464703	Ccl8	0.0299	2.634	0	2.583	0	4.789
A_51_P185660	Ccl9			0	1.818	0	2.736
A_55_P2929773	Ccna2					0.000883	1.613
A_51_P408946	Ccne1					0	1.529
A_52_P578732	Ccr5					0	1.951
A_51_P172853	Cd14			0.0078	1.68	0	1.973
A_55_P1960376	Cd209					0.00342	1.523
A_55_P2000224	Cd63					0	1.542
A_51_P120470	Cd68					0	1.673
A_51_P199135	Cd83					0.00731	1.537
A_55_P2805736	Cdc6					0	1.622
A_51_P125135	Cdca5					0	1.582
A_51_P133612	Cdt1					0	1.844
A_55_P2165869	Cebpb					0	1.561
A_51_P444447	Cebpd					0	2.36
A_55_P2165839	Cebpe					0	2.666
A_55_P2731001	Celf3					0.00642	-1.786
A_55_P2077263	Cenpk			0	1.533	0	1.851
A_55_P2742860	Cenpn					0	1.558
A_55_P2850037	Ces1					0	-1.542
A_51_P369784	Ces1e					0	-1.826
A_51_P178772	Ces1f					0	-2.64
A_51_P160536	Cfap161					0.0374	-1.744
A_66_P138911	Cfb			0.0078	1.801	0	2.821
A_51_P496905	Cfi					0.000883	1.748
A_51_P112966	Ch25h	0	2.266	0	3.036	0	4.773
A_51_P196973	Chaf1a					0	1.503
A_55_P2085181	Chaf1b					0	1.685
A_52_P56636	Chia					0.0498	1.631
A_51_P167292	Chil3/Chil4			0.0475	1.8	0.00224	1.991
A_52_P441294	Chl1					0	1.757
A_55_P2811722	Chrdl1					0.0016	-1.693
A_55_P2137010	Chrna7					0	1.868
A_55_P2120354	Cib2					0	-1.523
A_51_P490456	Cidec					0.00224	-2.717
A_51_P227004	Cks1b					0	1.665
A_52_P421543	Cldn23					0	-1.55
A_52_P414065	Clec10a	0.0299	1.763	0	2.058	0	2.126
A_51_P383032	Clec4d					0.0144	1.624
A_52_P218058	Clec5a			0.0237	1.522	0	2.089
A_51_P246653	Clec7a			0.0324	1.548	0	1.919
A_55_P2142028	Clip4					0	2.061
A_51_P515605	Col3a1					0	1.614
A_55_P2043337	Colq					0	-1.849
A_55_P2151071	Cox7a2l					0	-1.558
A_55_P2111302	Cp					0.0125	1.841
A_51_P139108	Cpxm1					0	2.103
A_52_P541270	Crebl2					0	-1.537
A_51_P122246	Creld2					0	1.636
A_51_P171075	Csf2					0	1.658
A_51_P146753	Csf2rb					0	1.682
A_52_P604629	Csrnp1					0	2.069
A_51_P307840	Cst8					0	-2.386
A_51_P114910	Cstb					0	1.513
A_51_P251357	Ctps1			0	1.509	0	2.064
A_52_P195839	Ctsc					0	1.632
A_52_P660945	Ctsf					0	-1.709
A_55_P1961335	Ctsk	0	1.855	0	2.08	0	2.316
A_55_P2016462	Cxcl10					0	4.379
A_55_P1966204	Cxcl12					0	2.593
A_51_P374198	Cxcl16					0	1.609
A_55_P2811679	Cxcl2					0.0313	1.54
A_52_P232813	Cxcl3			0.0166	1.555	0	2.277
A_55_P1990032	Cxcl6	0.0299	3.728	0	6.556	0	8.705
A_55_P2103249	Cxcr1			0.0364	1.707	0.0353	1.509
A_52_P559975	Cxcr2					0.00224	1.572
A_55_P1999301	Cyp2e1					0.00731	-2.431
A_51_P453909	Cyp2f1					0	-1.518
A_55_P1966749	Cyp2s1					0.00731	-1.547
A_51_P136303	Cyp4f8					0.0016	-1.743
A_51_P461429	Cyp7b1			0	1.514	0	2.787
A_52_P631547	Cytl1					0.00861	-1.907
A_55_P2216976	D13ertd608e					0.000883	1.616
A_52_P416756	D17h6S56e-5			0	1.87	0	1.998
A_55_P2032079	Dbp			0.0078	-2.108
A_55_P2908104	Dck					0	1.61
A_55_P2505946	Dclk1					0	2.258
A_51_P334104	Dcn					0.0297	-2.127
A_55_P2743349	Derl3					0.000883	1.888
A_55_P2909315	Dhfr			0	1.551	0	1.546
A_52_P223809	Dhx58					0.000883	1.611
A_52_P627068	Disp2					0.00396	1.594
A_55_P2133405	Dmkn					0.011	1.809
A_51_P188073	Dnajb11					0	1.518
A_51_P450169	Dnajb13					0.00342	-1.509
A_51_P446469	Dok2					0	1.895
A_51_P473259	Dpyd					0	-1.608
A_55_P2101757	Dscc1					0	1.771
A_55_P2164534	Dtl			0.0128	1.572	0	2.031
A_52_P399934	Dusp2					0.0144	1.58
A_51_P259029	Dusp26					0.000883	-1.537
A_55_P2302577	Dyrk1B					0	-1.594
A_51_P519108	Dzank1					0.00642	-1.692
A_66_P111334	E030013I19Rik					0	-1.795
A_55_P2000833	E2f8					0	1.568
A_55_P2004375	Ear2 (Includes Others)			0.0237	1.67	0.000883	1.773
A_51_P475378	Echdc3					0	-1.531
A_55_P2011912	Ecm2					0	-1.591
A_55_P1976127	Ect2					0	1.524
A_51_P160544	Efemp2					0	1.514
A_51_P440327	Efhc1					0.0289	-1.703
A_55_P1956418	Efr3b					0	1.538
A_52_P655687	Egfl6					0.00687	1.522
A_51_P173043	Egr2					0	1.815
A_52_P447567	Elapor1					0	-1.595
A_55_P2002578	Ephx1					0	-1.744
A_55_P2016105	Errfi1					0.0155	1.642
A_51_P239984	Exo1			0	1.562	0	2.07
A_51_P174961	F10			0	2.146	0	2.855
A_51_P484054	F7					0	1.701
A_51_P487818	Fabp1					0	-3.496
A_55_P2042217	Fam161a					0.0118	-1.738
A_55_P2844759	Fam32a					0	1.729
A_51_P139184	Fank1					0.0283	-1.621
A_55_P2732863	Fbn1					0	1.759
A_66_P135285	Fbxo32					0	-1.635
A_52_P408757	Fcgr2a					0	1.775
A_51_P130095	Fcgr2b			0.0166	1.518	0	1.989
A_55_P2927484	Fen1					0	1.599
A_51_P353494	Fetub					0.000883	1.836
A_51_P176086	Ffar2					0	1.675
A_55_P2713911	Fgfbp1					0	-1.587
A_55_P1984830	Fgl1					0.00948	1.642
A_51_P255805	Fhdc1					0	-1.683
A_55_P2496237	Fhit					0.0305	-1.525
A_55_P2011937	Fignl1	0.0299	1.648	0	1.809	0	2.661
A_52_P481493	Fkbp5					0	2.792
A_51_P269404	Fmo3					0	-4.953
A_52_P237357	Fn1					0	1.507
A_51_P398525	Fn3K					0.00285	-1.628
A_51_P153423	Fndc1					0.0498	-1.704
A_55_P2491758	Fxyd4			0.0078	3.689	0	5.247
A_55_P2737019	Fzd10Os					0.0106	-1.506
A_55_P2500841	Gabpb1					0	1.513
A_51_P315904	Gadd45g			0.0128	1.528	0	1.825
A_55_P2111855	Gale	0.0299	1.636			0	1.797
A_51_P462428	Galnt15					0	-2.044
A_55_P2736969	Gata3					0	-1.677
A_51_P461319	Gatm					0	1.909
A_55_P2106175	Gch1					0	1.716
A_51_P365019	Gclc					0	1.532
A_55_P1960735	Gdf15	0	1.545			0	1.585
A_51_P337089	Gins1			0	1.53	0	2.013
A_55_P2489999	Gins2			0	1.526	0	1.949
A_51_P517843	Glipr2					0	1.532
A_66_P131665	Gm19951					0	1.785
A_66_P122651	Gm26995					0	1.64
A_55_P2829355	Gm33936			0.0324	2.132
A_55_P1973352	Gm3579					0	1.843
A_52_P222230	Gm43305					0.0055	1.887
A_55_P2744925	Gm45935					0	1.523
A_55_P1986341	Gm4956					0	-1.696
A_52_P465129	Gm5150					0.000883	1.775
A_55_P2035757	Gm8884					0	1.961
A_51_P386810	Gmppb					0	1.514
A_51_P438967	Gpnmb			0	1.761	0	1.699
A_55_P2905286	Gpr171			0.0203	1.573	0	1.958
A_51_P108459	Gpr65					0	1.594
A_55_P2044932	Gpr84					0	1.59
A_55_P2004213	Gprasp2					0	-1.595
A_51_P241465	Gsn					0	-1.591
A_51_P503625	Gsta3					0	-2.018
A_55_P2170454	Gsta5					0	-2.909
A_51_P454949	Gstm3					0	-2.036
A_65_P02177	Gstm4					0	-1.61
A_55_P2062190	Gstm5					0	-1.917
A_51_P516133	H1-2					0	-1.531
A_51_P270949	H1F5					0	1.656
A_51_P492456	Has1			0.0446	1.735	0.000883	2.127
A_51_P109508	Havcr2					0.00224	1.5
A_51_P181565	Hbegf					0	1.586
A_51_P488739	Hcar2					0	1.909
A_52_P263658	Hes2			0	-1.524	0	-1.761
A_66_P127452	Hk3					0	1.688
A_55_P2912004	Hmgcs2					0	-2.13
A_55_P2757433	Hmox1					0	1.641
A_55_P2831804	Hpcal4					0.00989	-1.652
A_51_P325836	Hpx			0.0128	1.656	0	2.056
A_55_P2043062	Hs3st6					0	-1.835
A_55_P2830399	Hsp90b1					0	1.519
A_55_P2076772	Hspa5					0	1.744
A_66_P131023	Htr3a			0.0426	1.853
A_66_P115088	Hyou1					0	1.536
A_55_P1962918	Ifi16					0	2.141
A_52_P90363	Ifi27l2a/Ifi27l2b					0.0472	1.639
A_55_P2911888	Ifit1b					0	2.047
A_55_P1972872	Ifit3					0.000883	1.58
A_51_P184928	Ifitm7					0	1.57
A_51_P147942	Igf1					0.0122	1.687
A_55_P2803213	Igfbp3					0	-1.836
A_66_P139546	Igfbp6					0	-1.658
A_52_P577384	Il18bp					0	2.003
A_51_P212782	Il1b					0	2.328
A_55_P2804650	Il1r2					0	2.114
A_52_P431159	Il1rn					0	2.147
A_55_P2046064	Il22ra2					0.005	-1.599
A_55_P1964960	Il33					0	2.611
A_55_P2087622	Il4I1	0	1.61	0	1.738	0	2.046
A_55_P1997756	Il6			0	2.064	0	3.736
A_51_P162162	Inmt					0	-1.505
A_55_P2021275	Iqca1					0.0453	-1.706
A_55_P2744251	Irf7					0	2.004
A_55_P2103698	Isg15					0	2.208
A_55_P2040011	Itga7					0	2.181
A_66_P140913	Itga8					0	-1.602
A_51_P303424	Itgax					0	1.547
A_55_P2060243	Itgbl1					0.00342	-1.501
A_55_P2077055	Itih4			0.0128	1.583	0	2.42
A_55_P2077048	Itih5					0.00642	-1.736
A_51_P273609	Itpka					0.0016	-1.85
A_51_P344346	Itprid1					0.0178	-1.702
A_52_P331930	Jpt2					0	1.539
A_51_P493522	Kazald1					0	-1.604
A_52_P130787	Kcna6					0.0122	-1.57
A_51_P508838	Kcne4					0	1.582
A_55_P2913680	Kcnip4	0.0299	-1.566			0	-1.957
A_55_P2081050	Kcnj13					0	-1.732
A_55_P2090330	Kcnmb4					0.0137	-1.501
A_55_P1980826	Kcnrg					0.00731	-1.686
A_51_P479352	Klhdc9					0.0129	-1.528
A_51_P208121	Klhl25			0.0464	1.776
A_55_P2003414	Kng1					0	2.696
A_55_P1981366	Lamc2					0	1.539
A_55_P2070869	Lcn2	0	1.838	0	3.916	0	8.154
A_66_P116083	Ldhb					0	-1.858
A_51_P465281	Lgals1					0	1.619
A_51_P101929	Lgals3			0.027	1.501	0	1.774
A_51_P359636	Lgals3bp					0	1.62
A_52_P446364	Lgi2					0	2.168
A_55_P2108255	Lgmn					0	1.602
A_55_P2152771	Lhfpl2					0	1.527
A_51_P285446	Lig1					0	1.726
A_55_P1957459	Lilrb4			0	1.631	0	2.237
A_66_P137745	Lrp2					0	1.985
A_51_P153683	Lrrc26					0.0137	-1.511
A_55_P1999760	Lrrc51					0.031	-1.777
A_55_P2489004	Lrrc74b					0.0102	-1.699
A_51_P109449	Ltb4r					0	1.646
A_55_P2015292	Ltc4s					0.0122	-1.501
A_55_P2087118	Ly6a (Includes Others)			0	2.842	0	5.999
A_55_P2090060	Mab21l3	0.0299	1.509			0.000883	1.532
A_52_P608322	Maff					0	1.61
A_55_P2077068	Malt1					0	1.672
A_51_P418168	Manf					0	1.61
A_55_P2106039	Map3k6					0.00642	1.621
A_55_P2063626	Matk					0	2.034
A_55_P2105843	Mbd1					0	1.77
A_51_P212682	Mcm10					0	1.581
A_51_P158210	Mcm2			0	1.543	0	2.204
A_52_P364776	Mcm3					0	1.705
A_51_P356762	Mcm4					0	1.595
A_51_P190111	Mcm5					0	1.562
A_51_P360492	Mcm6			0	1.525	0	1.9
A_51_P165704	Mcm7					0	1.534
A_66_P118891	Mcpt-ps1					0	2.125
A_51_P464918	Mefv					0	2.202
A_55_P2013336	Melk					0	1.55
A_55_P2128969	Mettl27					0	-1.585
A_55_P2110743	Mettl7a2/Mettl7a3					0	-1.536
A_51_P385697	Mgat3					0.0199	-1.625
A_51_P253803	Mki67					0.00342	1.546
A_55_P2024803	Mmp12					0	1.562
A_55_P2495403	Mmp19					0	2.274
A_51_P255699	Mmp3					0	2.263
A_55_P2831118	Mmp8					0.0185	1.62
A_55_P2040485	Ms4a4a					0	1.526
A_66_P116441	Ms4a6a			0	2.056	0	2.813
A_52_P423810	Mt1					0	1.844
A_51_P246317	Mt2					0	2.441
A_55_P2745905	Mthfd2			0	1.564	0	1.966
A_51_P445487	Mturn					0	-1.68
A_55_P2025687	Muc4			0.0464	2.026	0.000883	2.256
A_55_P2007457	Muc5b					0.0242	3.27
A_55_P2118441	Mx1					0.00598	1.594
A_51_P514085	Mx2					0.0178	1.562
A_55_P2013665	Mybpc2					0	1.696
A_51_P123920	Mydgf					0	1.505
A_55_P2093232	Myh7					0	-2.033
A_51_P489268	Ncapg					0	1.503
A_51_P424810	Ncapg2					0	1.583
A_55_P1958857	Nek6					0	1.571
A_55_P2494328	Net1					0	-1.51
A_51_P298790	Neurog1					0.00396	-1.668
A_52_P201337	Nfatc2Ip			0.0475	-1.532
A_51_P454217	Nfkb2					0	1.527
A_51_P295192	Nfkbia					0	1.6
A_55_P2905311	Niban1					0.0016	-1.551
A_55_P2100120	Nme1					0	1.6
A_55_P2016959	Nme2					0	1.662
A_52_P622434	Nop16					0	1.892
A_55_P2111907	Noxo1	0	2.002	0	2.226	0	3.38
A_51_P223776	Nr1d1			0.0426	-1.5
A_55_P2003541	Nrcam					0.00285	1.597
A_55_P2822982	Nrn1					0	-1.531
A_65_P18472	Nrp1					0.00224	-1.555
A_66_P107165	Nuak1					0	-1.645
A_52_P357587	Nup155					0	1.914
A_52_P324754	Nupr2					0	-1.641
A_55_P1998943	Oas1					0	1.959
A_55_P2019719	Oas2					0.0016	1.528
A_51_P387123	Oasl2					0	1.869
A_51_P295085	Ogn					0	-1.737
A_51_P141546	Orm1 (Includes Others)					0	5.466
A_55_P2830665	Osm					0	2.442
A_51_P319460	Osmr					0	1.532
A_52_P478159	P2rx6					0.0255	-1.731
A_51_P301367	P2ry10			0.0166	1.56	0	1.784
A_52_P587738	P2ry2					0	1.629
A_51_P223709	Pask					0	1.664
A_51_P230098	Pbk					0	1.623
A_51_P324450	Pbp2			0	1.667	0	2.125
A_51_P396351	Pcna					0	1.675
A_51_P245789	Pcolce2					0	-1.612
A_66_P113216	Pdia3					0	1.556
A_51_P328300	Pdia4					0	1.806
A_55_P2053491	Pdia6					0	1.76
A_55_P2746348	Pdpn					0	1.692
A_55_P1970033	Per1					0.0195	1.694
A_55_P2015687	Phf11					0	1.593
A_55_P2083963	Phgr1					0.0114	1.549
A_55_P2000284	Phox2a					0	1.539
A_55_P1999902	Pip5K1a					0	1.554
A_55_P2797212	Pir					0	-1.512
A_55_P1962305	Plac8					0	1.63
A_55_P1956593	Plekha4					0	1.586
A_55_P2060991	Plppr3					0.00731	1.604
A_66_P122294	Pnpla5					0	-1.665
A_51_P269687	Pole2					0	1.7
A_51_P108659	Pon1					0	-3.855
A_51_P443508	Ppa1					0	1.693
A_51_P428372	Ppbp					0.0185	-1.637
A_66_P111317	Prdm9					0.00774	-1.523
A_55_P1954758	Prickle1					0	-1.559
A_51_P168632	Prim1					0	1.706
A_51_P338998	Prim2					0	1.552
A_55_P2055087	Prkar2b					0.000883	-1.647
A_51_P170959	Proz					0	2.184
A_55_P2067752	Psg18 (Includes Others)			0.0464	2.167
A_55_P2041868	Ptafr					0	1.652
A_51_P312327	Ptges					0.00285	1.538
A_55_P1994309	Ptgir					0	1.579
A_51_P279100	Ptgs1					0	2.152
A_55_P2738992	Qsox1					0.00285	1.519
A_55_P1994927	Rab3Il1					0	1.699
A_52_P11441	Rab6b					0	-1.52
A_51_P148105	Rad51			0	1.579	0	2.046
A_55_P2732503	Rad51ap1					0	1.704
A_51_P348665	Ramp1					0	-1.636
A_51_P433127	Rdm1					0	-1.663
A_51_P257951	Retnla					0.0172	1.623
A_51_P428360	Retnlb					0	1.51
A_55_P2159807	Rfc4					0	1.607
A_51_P260683	Rgs1			0.0128	1.823	0	2.58
A_51_P491987	Ripk3					0	1.587
A_51_P455338	Rnase2					0.00224	-1.675
A_55_P2009217	Rnu3b1					0	1.845
A_51_P379710	Rpn1					0	1.614
A_55_P2173982	Rrm2					0	1.686
A_55_P2759760	Rrp12					0	1.502
A_55_P1977776	Rs5-8s1					0.00285	1.675
A_52_P670026	Rsad2					0.005	1.858
A_51_P419226	S100a14					0	2.145
A_51_P105078	S100a4			0.0078	1.509	0	1.776
A_52_P318673	Saa1			0.0384	2.285	0	15.081
A_66_P106131	Saa3			0	6.838	0	97.862
A_52_P156775	Scgb1c1					0.000883	-1.639
A_55_P2027609	Scgb3a2					0.000883	-3.817
A_55_P1963920	Scimp					0	1.637
A_52_P113611	Scn5a					0.000883	-1.746
A_55_P2060429	Scube2					0	-1.706
A_55_P2014209	Scyl2					0.0158	1.509
A_51_P280446	Sdf2l1	0	1.735	0	1.675	0	2.633
A_55_P2051962	Sec61b					0	1.508
A_51_P431020	Selenbp1					0	-1.554
A_51_P470328	Selenop					0	-1.518
A_55_P2014284	Serpina11					0	1.825
A_51_P159453	Serpina3			0	2.093	0	3.107
A_55_P1966774	Serpina3g (Includes Others)	0	1.517	0.0078	1.526	0	2.186
A_55_P2142222	Serpina3h					0	1.545
A_55_P1993933	Serpinb1c	0.0299	6.397	0	8.113	0	9.736
A_55_P2903199	Serpinb9					0	1.57
A_51_P468140	Serpind1			0	1.779	0	1.706
A_55_P2119257	Serpine1					0	1.507
A_66_P134428	Sfrp1					0	1.732
A_51_P520849	Sfrp2					0.0469	1.699
A_51_P148037	Sh3pxd2b					0	1.609
A_51_P204402	Shcbp1					0	1.58
A_55_P2823856	Siglec8					0.0362	-1.646
A_55_P2061278	Sik1					0	1.513
A_55_P2041095	Six4					0.0016	-1.751
A_52_P513177	Sla					0.000883	1.629
A_51_P514319	Slc13a4					0	-1.779
A_51_P489720	Slc16a11			0.0446	-1.724	0	-2.339
A_55_P1964752	Slc23a3					0	1.711
A_51_P224164	Slc26a4	0.0299	5.882	0	8.361	0	11.765
A_55_P1960238	Slc2a6					0	1.545
A_51_P209319	Slc35b1					0	1.504
A_55_P2013760	Slc39a14					0	1.943
A_51_P299805	Slc46a3					0	-1.504
A_55_P2493214	Slc4a5					0	-1.735
A_51_P412024	Slc6a20			0.0078	1.866	0.000883	1.738
A_55_P2849189	Slc7a2					0	1.626
A_51_P112734	Slc7a8					0	1.798
A_52_P255782	Slco2b1					0.0016	-1.641
A_51_P183812	Slfn12l					0	1.804
A_52_P472324	Slpi					0.00224	2.081
A_55_P2172274	Smc2					0	1.531
A_66_P115236	Smim38					0	-1.507
A_66_P118356	Smim4					0	-1.546
A_51_P483180	Snx7					0	1.883
A_55_P2908509	Sod2					0	1.579
A_55_P2812793	Sorcs2					0	1.796
A_51_P273596	Sord					0	-1.603
A_65_P09624	Sox11					0.00224	-1.511
A_51_P404193	Sp5					0	1.582
A_55_P2171764	Spag11b					0	-1.81
A_55_P1965154	Spc25					0	1.833
A_52_P381484	Spon2					0.00687	1.679
A_51_P358765	Spp1					0	1.662
A_51_P139678	Sprr1a					0	1.558
A_55_P2048855	Sprr2a3			0.0166	2.721	0.00342	2.714
A_55_P2740799	Srprb			0.0446	1.795
A_51_P143893	Steap4					0	1.907
A_51_P240801	Sting1					0	1.54
A_51_P511511	Stk33					0.0155	-1.837
A_55_P2736215	Syne1					0.000883	-1.584
A_51_P404875	Synm					0	-1.576
A_55_P2815841	Tcaf2					0	1.509
A_55_P1987196	Tcte3					0.0283	-1.528
A_55_P2912692	Tef	0.0299	-1.63
A_51_P109933	Tekt2					0.00687	-1.615
A_55_P2141088	Tenm4					0.0356	-1.635
A_52_P228236	Tfrc					0	1.849
A_51_P212754	Tgfbi					0	1.951
A_52_P627816	Tgm1			0.0297	1.515	0	1.945
A_52_P134639	Tgoln2					0	1.549
A_55_P2746459	Thbs1			0	1.73	0	2.415
A_52_P379531	Timeless					0	1.598
A_52_P87713	Timp1			0	4.233	0	15.047
A_51_P224013	Tk1					0	1.545
A_51_P258098	Tmem176a					0	1.692
A_55_P1971962	Tmem176b					0	1.778
A_51_P401501	Tmem213					0.00224	2.035
A_51_P303079	Tmem54			0.0166	1.538
A_55_P2177998	Tmprss13					0.0016	-1.571
A_51_P291438	Tnc					0	1.65
A_55_P2053838	Tnfaip3					0	1.681
A_55_P2082180	Tnfrsf9			0	2.162	0	2.805
A_51_P257934	Tnfsf13b			0.0166	1.503	0	1.832
A_66_P106167	Tnfsf15					0	1.522
A_51_P497402	Tonsl					0	1.552
A_66_P120837	Top2a			0.027	1.521	0.000883	1.692
A_51_P343833	Traf1					0	-1.571
A_51_P105709	Trip13					0	1.673
A_55_P2078428	Tstd1					0	-1.736
A_55_P2108837	Tuba1c					0	1.647
A_52_P163795	Tubb					0	1.555
A_51_P490023	Tubb2a					0	1.541
A_51_P421140	Tubb6					0	1.656
A_51_P398366	Tyms					0	1.812
A_51_P351363	Tyms-ps					0	1.607
A_55_P2035286	Uhrf1	0	1.879	0	2.025	0	2.844
A_55_P2156425	Upk1a					0	-1.864
A_66_P127978	Upp1					0	1.608
A_55_P2114953	Usp18					0	1.504
A_52_P520495	Vcam1					0	1.632
A_55_P2501751	Vcan					0	1.855
A_51_P500044	Vldlr					0	-1.604
A_55_P2480355	Vmn1r63 (Includes Others)					0.0297	-1.528
A_55_P2595257	Vmp1					0	1.584
A_51_P424532	Vnn1			0	1.531	0	1.78
A_51_P265374	Vnn3			0	1.638	0	1.803
A_55_P2145496	Wdr45					0	-1.508
A_55_P2129488	Wfdc10					0	-1.592
A_52_P700056	Wfdc17			0.0464	1.891	0	2.293
A_51_P108226	Wfdc21					0	2.041
A_55_P2106911	Wnt1					0.0233	-1.503
A_55_P1994042	Zbp1					0	2.018
A_66_P126311	Zfp41					0.0329	-1.657
A_51_P126626	Znf503					0	-1.64

## Sheet: b. NRCWE-062
Table S6. Upregulated and downregulated genes in mouse lung tissue after 1 day of exposure to NRCWE-061, NRCWE-062, NRCWE-063, and NRCWE-064.
Table S6b. Upregulated and downregulated genes in mouse lung tissue after exposure to NRCWE-062. FDR adjusted p-value ≤ 0.05 and fold change ≤−1.5 or ≥ 1.5.
		Low dose (6 µg/mouse)		Medium dose (18 µg/mouse)		High dose (54 µg/mouse)
Agilent ID	Gene Symbol	FDR adj p-value	Fold Change	FDR adj p-value	Fold Change	FDR adj p-value	Fold Change
A_52_P504641	1700052I22Rik					0.0106	-1.775
A_66_P111154	1700066B19Rik					0	1.89
A_51_P502872	2200002D01Rik					0	1.553
A_52_P209277	4921507G05Rik			0.034	2.122	0.0024	2.424
A_66_P133257	9530026P05Rik					0.0141	-1.675
A_52_P665675	Abca1					0	-1.645
A_51_P379385	Abca8a					0	-2.042
A_51_P123625	Acod1					0	2.532
A_51_P268154	Acsl4					0	1.592
A_55_P2159555	Adamts4					0	1.927
A_55_P2717822	Adamts9					0.00429	1.545
A_55_P1972605	Adora3					0	2.086
A_55_P1992849	Adrb3					0.00586	-2.301
A_55_P2049717	Agrp			0.0225	1.577
A_51_P400543	Aif1					0.00512	1.542
A_51_P128987	Akr1b10					0.00338	1.578
A_51_P111335	Akr1c19					0.0024	1.554
A_51_P334942	Aldh1a1					0	-1.732
A_52_P87843	Aldh1a3					0.0024	1.978
A_66_P130688	Aldh2					0	-1.621
A_51_P338485	Aldh6a1					0	-1.607
A_51_P494125	Alpl					0	1.696
A_51_P220150	Angptl7					0.0112	-1.528
A_51_P303160	Arg1					0	3.577
A_52_P374897	Arg2			0.00817	1.529	0	1.984
A_52_P267651	Arntl			0.0416	-1.569
A_55_P2027812	Arxes1/Arxes2					0.00932	-1.585
A_55_P2003824	Asgr1					0.0492	-1.72
A_51_P499698	Asprv1					0	1.61
A_55_P2347756	Au040972			0.0368	2.199
A_55_P2110758	B430306N03Rik					0	2.208
A_51_P419286	Batf3					0.00135	1.575
A_55_P1971599	Bcan					0	-2.209
A_66_P105175	Bche					0.00733	-1.538
A_52_P299771	Bcl2a1c					0	1.909
A_51_P309307	Bcl2l15					0.00135	1.578
A_51_P237668	Bex1					0	-1.508
A_52_P340669	Bhlha15					0.00135	1.902
A_51_P475523	Brca1					0.00135	1.534
A_55_P2137049	C15orf48			0	3.319	0	6.232
A_51_P305213	C17orf58					0	-1.734
A_55_P2151011	C1qtnf7					0	-1.56
A_51_P110301	C3			0.00817	2.168	0	3.089
A_55_P2156855	Ca13					0	1.605
A_66_P104365	Ccdc167					0	1.742
A_55_P2869822	Ccl11					0.00135	1.747
A_51_P114462	Ccl17			0	3.336	0	4.542
A_52_P249514	Ccl2			0	1.952	0	2.691
A_51_P286737	Ccl2			0.00817	1.829	0	3.046
A_51_P408595	Ccl20			0	2.02	0.0117	1.69
A_52_P18116	Ccl24			0.00817	3.616	0	13.359
A_51_P140710	Ccl3L3					0	1.631
A_51_P509573	Ccl4			0.00817	1.849	0	3.333
A_51_P436652	Ccl7			0	2.908	0	6.01
A_51_P464703	Ccl8			0	2.667	0	4.237
A_51_P185660	Ccl9			0	1.784	0	2.636
A_51_P157042	Ccn2					0.0141	-1.621
A_51_P291501	Ccno					0.0112	1.606
A_52_P661044	Ccr3					0.0024	1.661
A_52_P578732	Ccr5					0	1.602
A_51_P172853	Cd14			0	1.987	0	2.389
A_51_P385718	Cd177					0.00429	1.621
A_55_P1960376	Cd209					0.00512	1.576
A_66_P126211	Cd300lf					0	1.519
A_55_P2000224	Cd63					0	1.57
A_51_P120470	Cd68					0.00135	1.573
A_55_P2805736	Cdc6					0	1.594
A_55_P2739416	Cdk5rap3					0.00932	1.541
A_51_P133612	Cdt1					0	1.772
A_55_P2165839	Cebpe					0	2.672
A_55_P2106150	Cenpk					0	1.795
A_66_P138911	Cfb			0	1.726	0	3.137
A_51_P496905	Cfi					0.00429	1.721
A_51_P112966	Ch25h			0	2.57	0	3.877
A_51_P196973	Chaf1a					0	1.61
A_55_P2085181	Chaf1b					0	1.767
A_52_P441294	Chl1					0.00586	1.631
A_55_P2811722	Chrdl1					0	-1.903
A_55_P2137010	Chrna7					0	1.732
A_51_P490456	Cidec					0.00135	-3.066
A_52_P414065	Clec10a					0	1.995
A_51_P383032	Clec4d					0.00135	2.121
A_52_P218058	Clec5a			0.0136	1.528	0	2.345
A_51_P246653	Clec7a					0	1.815
A_55_P2142028	Clip4			0	1.578	0	1.975
A_55_P2017929	Clu					0	1.565
A_52_P362757	Col6a2					0	1.514
A_55_P2043337	Colq					0	-1.72
A_55_P2151071	Cox7a2l					0	-1.534
A_52_P423814	Cox8b					0.00932	-2.524
A_55_P2111302	Cp			0.00817	2.154	0	2.605
A_51_P139108	Cpxm1			0.00817	1.54	0	1.96
A_55_P2319468	Creb5					0	1.547
A_51_P171075	Csf2			0.00817	1.593	0	1.965
A_51_P146753	Csf2rb					0.0024	1.524
A_51_P307840	Cst8			0.0368	-1.602	0.0024	-1.844
A_51_P114910	Cstb					0	1.567
A_51_P251357	Ctps1					0	1.735
A_52_P195839	Ctsc					0	1.571
A_52_P660945	Ctsf					0	-1.927
A_55_P1961335	Ctsk			0	1.978	0	2.011
A_51_P212308	Cxadr					0	1.559
A_55_P2016462	Cxcl10					0	4.998
A_55_P1966204	Cxcl12			0	1.693	0	2.605
A_51_P374198	Cxcl16					0	1.506
A_55_P2811679	Cxcl2			0.0368	1.719	0.0203	1.675
A_52_P232813	Cxcl3			0.0225	1.573	0	2.814
A_55_P1990032	Cxcl6			0	6.841	0	13.712
A_55_P2103249	Cxcr1			0.0287	1.73
A_52_P559975	Cxcr2					0	1.84
A_51_P461429	Cyp7b1			0	1.598	0	2.406
A_52_P631547	Cytl1					0.00512	-2.172
A_52_P416756	D17H6S56e-5			0	1.751	0	2.182
A_55_P2032079	Dbp	0	2.399	0.0491	1.867
A_55_P2505946	Dclk1			0	1.611	0	2.527
A_55_P2172935	Dgkb					0.0112	-1.721
A_52_P223809	Dhx58					0.0106	1.506
A_55_P2083609	Dkk3					0	-1.504
A_55_P2133405	Dmkn					0	2.221
A_51_P496720	Dnmt3l					0	1.516
A_51_P446469	Dok2					0	1.987
A_51_P227345	Dpep1					0	-1.672
A_51_P473259	Dpyd					0	-2.088
A_55_P2101757	Dscc1					0	1.608
A_55_P2164534	Dtl			0.0136	1.522	0	2.086
A_66_P111334	E030013I19Rik			0	-1.562	0	-1.837
A_55_P2723014	Ear12			0.0258	-1.563	0.0024	-1.575
A_55_P2157008	Ear2 (Includes Others)			0	-1.89	0.0106	-1.753
A_55_P2011912	Ecm2					0	-1.725
A_51_P160544	Efemp2					0	1.516
A_51_P173043	Egr2					0	1.551
A_55_P2804604	Ehf					0.0136	1.532
A_55_P2002578	Ephx1					0	-1.581
A_51_P239984	Exo1					0	1.711
A_51_P174961	F10			0.0225	1.735	0	2.122
A_51_P484054	F7					0.0024	1.676
A_51_P487818	Fabp1					0	-3.759
A_55_P1974367	Fabp3					0.0391	-2.485
A_51_P186703	Fbln5					0	-1.813
A_55_P2732863	Fbn1					0	1.947
A_66_P135285	Fbxo32					0.0024	-1.537
A_52_P545613	Fcgr2b					0.0112	1.674
A_55_P2927484	Fen1					0	1.55
A_51_P353494	Fetub			0.00817	1.959	0	2.021
A_51_P176086	Ffar2					0.00135	1.805
A_55_P1984830	Fgl1					0.00866	1.793
A_51_P335000	Fhl1					0	-1.673
A_55_P2011937	Fignl1			0	1.696	0	2.237
A_55_P2145506	Flt3lg					0	-1.545
A_52_P273891	Fmo2					0	-1.668
A_51_P269404	Fmo3					0	-2.948
A_51_P312485	Fpr1			0.0416	-1.54
A_55_P2491758	Fxyd4					0	4.23
A_51_P315904	Gadd45g					0	1.691
A_55_P2111855	Gale					0	1.735
A_51_P462428	Galnt15					0	-1.849
A_51_P461319	Gatm					0.0024	1.692
A_55_P2106175	Gch1					0	1.603
A_55_P1960735	Gdf15			0	1.515
A_52_P102931	Gimap1-Gimap5					0.00866	1.504
A_51_P337089	Gins1					0	1.881
A_55_P2489999	Gins2					0	1.835
A_52_P382886	Gjb2					0.0136	1.518
A_51_P517843	Glipr2					0	1.56
A_55_P2119552	Gm2192					0	-1.623
A_66_P110437	Gm35188					0.0194	-1.689
A_55_P1973352	Gm3579					0.00429	1.53
A_55_P1986341	Gm4956					0	-2.073
A_55_P2046328	Gm6225					0	-2.065
A_55_P2035757	Gm8884					0	1.925
A_55_P2134992	Golgb1					0.013	2.073
A_51_P438967	Gpnmb			0	1.701	0	1.644
A_55_P2044932	Gpr84					0	1.578
A_51_P486810	Gpx2			0.0435	1.846
A_51_P241465	Gsn					0	-1.687
A_51_P503625	Gsta3					0	-1.811
A_55_P2170454	Gsta5					0.00135	-1.975
A_51_P454949	Gstm3					0	-1.685
A_55_P1966432	Gstm5					0	-1.584
A_51_P270949	H1f5					0.00586	1.597
A_55_P2166177	H2-M1/H2-M9					0.00429	-1.69
A_51_P181565	Hbegf					0	1.521
A_51_P488739	Hcar2			0.0435	1.6	0	2.26
A_52_P263658	Hes2					0	-1.873
A_66_P127452	Hk3					0	1.725
A_55_P2912004	Hmgcs2					0	-1.801
A_55_P2757433	Hmox1					0	1.998
A_66_P120165	Hnrnpd					0	1.539
A_51_P325836	Hpx			0.0185	1.667	0	3.264
A_51_P127297	Hsd11b1					0.00135	-1.526
A_55_P2740832	Hsp90aa1	0	-1.532
A_55_P1962918	Ifi16					0.00338	1.859
A_55_P2911888	Ifit1b					0.00135	1.909
A_55_P1972872	Ifit3					0.00512	1.625
A_55_P2803213	Igfbp3			0	-1.517
A_66_P139546	Igfbp6					0	-1.55
A_52_P577384	Il18bp					0	1.766
A_51_P212782	Il1b					0	2.203
A_55_P2804650	Il1r2					0	2.161
A_52_P431159	Il1rn					0	2.495
A_55_P1964960	Il33					0	1.963
A_55_P2087622	Il4I1			0	2.045	0	2.45
A_55_P1997756	Il6					0	3.524
A_51_P162162	Inmt					0	-1.619
A_55_P2744251	Irf7					0.00586	1.688
A_55_P2103698	Isg15					0	2.087
A_51_P228658	Isyna1					0.00338	1.513
A_55_P2040011	Itga7			0.0474	1.555	0	2.189
A_55_P2060243	Itgbl1					0.00338	-1.687
A_55_P2077055	Itih4			0	1.654	0	2.408
A_51_P153132	Kcne2					0.00429	-1.504
A_55_P2913680	Kcnip4					0.00659	-1.531
A_55_P2500688	Kcnj2					0.0124	-1.591
A_55_P2793729	Klf15					0.0228	-1.571
A_51_P168439	Klhl24					0	-1.506
A_55_P2720053	Kmt5b					0	-1.53
A_55_P2003414	Kng1					0.00586	2.353
A_55_P1981366	Lamc2					0	1.624
A_51_P510156	Lcn2			0	4.992	0	7.74
A_55_P2506350	Lepr					0.00135	-1.569
A_51_P465281	Lgals1					0.00429	1.669
A_51_P101929	Lgals3					0	1.833
A_52_P446364	Lgi2			0	1.612	0	2.116
A_55_P2108255	Lgmn					0	1.512
A_51_P285446	Lig1					0	1.591
A_55_P1957459	Lilrb4			0.00817	1.511	0	2.1
A_51_P346938	Lrg1					0	1.558
A_52_P285470	Lrp2					0	1.561
A_51_P109449	Ltb4r					0	1.546
A_55_P2015292	Ltc4s					0.0024	-1.662
A_55_P2087118	Ly6a (Includes Others)			0	3.495	0	5.776
A_51_P105068	Lypd6b			0.0416	1.524
A_55_P2090060	Mab21l3					0	1.768
A_55_P2077068	Malt1					0	1.546
A_52_P459599	Marchf2					0.013	-1.823
A_55_P2063626	Matk			0	1.52	0	2.294
A_51_P158210	Mcm2			0	1.522	0	1.899
A_52_P364776	Mcm3					0	1.65
A_51_P360492	Mcm6			0	1.503	0	1.799
A_66_P118891	Mcpt-Ps1					0.00338	1.587
A_51_P464918	Mefv					0	2.248
A_55_P2110743	Mettl7a2/Mettl7a3					0	-1.532
A_55_P2114342	Mirt2					0	1.646
A_55_P2495403	Mmp19					0	2.103
A_51_P255699	Mmp3					0	2.361
A_66_P130121	Mmp9					0.00429	1.65
A_55_P2040485	Ms4a4a					0	1.646
A_66_P116441	Ms4a6a					0	2.206
A_51_P193146	Ms4a6c					0.0194	1.507
A_51_P246317	Mt2			0.00817	1.564	0	2.041
A_55_P2745905	Mthfd2					0	1.829
A_51_P218910	Mturn					0	-1.609
A_51_P211506	Muc20					0.0164	1.762
A_55_P2025687	Muc4			0.0185	2.255	0.00135	2.636
A_51_P169527	Mvk					0	1.563
A_55_P2118441	Mx1					0.0024	1.742
A_55_P2013665	Mybpc2			0	1.563	0	1.799
A_55_P2093232	Myh7			0.00817	-1.674	0	-1.688
A_55_P1958857	Nek6					0	1.535
A_55_P2100120	Nme1					0	1.681
A_55_P2016959	Nme2					0	1.544
A_55_P2304507	Noxa1					0.0246	1.61
A_55_P2111907	Noxo1			0	2.989	0	4.092
A_52_P489373	Npr2					0	-1.556
A_55_P2807962	Npr3					0.00135	-2.179
A_51_P223776	Nr1d1	0	1.716
A_55_P2822982	Nrn1					0.00659	-1.532
A_51_P437426	Nrros					0	1.535
A_52_P357587	Nup155					0	1.595
A_55_P1998943	Oas1					0.0189	1.52
A_51_P437309	Oasl					0	1.511
A_51_P387123	Oasl2					0.00659	1.547
A_51_P295085	Ogn					0	-2.105
A_51_P342926	Omd					0	-1.717
A_51_P141546	Orm1 (Includes Others)					0	9.598
A_55_P2830665	Osm					0	2.299
A_51_P301367	P2Ry10					0.0168	1.524
A_51_P223709	Pask					0	1.586
A_51_P324450	Pbp2					0	2.117
A_51_P396351	Pcna					0	1.541
A_51_P245789	Pcolce2					0	-1.749
A_51_P345649	Pdgfra					0	-1.661
A_55_P2746348	Pdpn					0	1.693
A_55_P2106454	Phf24					0	-1.542
A_55_P2083963	Phgr1					0.0199	1.604
A_55_P2645225	Pigr			0	1.966	0.00429	1.734
A_52_P338651	Pitpnm2					0.00733	1.568
A_52_P686218	Plb1					0	1.515
A_52_P1109107	Plxdc2					0	-1.573
A_51_P269687	Pole2					0	1.644
A_51_P443508	Ppa1					0	1.676
A_55_P2009673	Ppp1r14d			0.0136	1.966	0.0136	1.899
A_55_P2026275	Ppp1r1b					0	-1.899
A_51_P168632	Prim1					0	1.625
A_55_P2055087	Prkar2b					0.0349	-1.514
A_51_P170959	Proz			0	2.034	0	2.247
A_52_P238044	Psmc3Ip					0	1.581
A_55_P2041868	Ptafr					0	1.543
A_51_P312327	Ptges					0.00512	1.587
A_55_P1994309	Ptgir			0	1.547	0	1.58
A_51_P279100	Ptgs1					0	1.962
A_52_P605812	Ptrh1					0	1.52
A_51_P438821	Pycard					0	1.526
A_55_P2134790	Qsox1			0.0314	1.643
A_55_P1994927	Rab3Il1					0	1.558
A_51_P148105	Rad51					0	1.699
A_51_P348665	Ramp1					0	-1.639
A_51_P340699	Rasl11a			0	-1.543
A_51_P262340	Rbm3					0	1.57
A_55_P2496218	Rbp7					0.0147	-2.263
A_51_P433127	Rdm1					0	-1.588
A_51_P257951	Retnla					0.0185	1.702
A_51_P428360	Retnlb					0.00135	1.548
A_55_P2159807	Rfc4					0	1.531
A_51_P260683	Rgs1					0	2.081
A_51_P455338	Rnase2			0.0368	-1.645	0.00659	-1.713
A_51_P237383	Rnase4					0.00135	-1.516
A_55_P2009217	Rnu3b1					0.0463	1.556
A_51_P379710	Rpn1					0	1.557
A_55_P2173982	Rrm2					0	1.532
A_55_P2759760	Rrp12					0	1.577
A_52_P670026	Rsad2					0.00512	2.11
A_66_P113539	Rsrp1					0	-1.54
A_51_P419226	S100a14					0	1.976
A_51_P105078	S100a4					0	1.873
A_52_P318673	Saa1			0	3.495	0	20.343
A_66_P106131	Saa3			0	13.656	0	120.811
A_55_P2119772	Scn3a					0.00801	-1.691
A_51_P447595	Scube1					0	-1.561
A_51_P192397	Scube2					0	-1.812
A_51_P280446	Sdf2l1			0.00817	1.516	0	2.02
A_66_P106468	Sec61a1					0.0024	1.546
A_55_P2051962	Sec61b					0	1.528
A_55_P2155421	Sec61g					0	1.56
A_51_P470328	Selenop					0	-1.54
A_51_P211854	Selp					0	1.595
A_55_P2014284	Serpina11					0	2.032
A_51_P159453	Serpina3			0	1.776	0	2.87
A_55_P2142232	Serpina3g (Includes Others)			0.00817	1.514	0	1.925
A_55_P1993933	Serpinb1c			0	6.58	0	10.662
A_55_P2903199	Serpinb9					0	1.582
A_51_P468140	Serpind1					0.0112	1.538
A_66_P134428	Sfrp1					0.00338	1.558
A_51_P514319	Slc13a4					0	-1.956
A_51_P432180	Slc16a6					0	1.507
A_55_P1964752	Slc23a3					0	1.702
A_51_P224164	Slc26a4			0.00817	6.328	0	11.191
A_55_P2013760	Slc39a14					0	1.502
A_51_P140347	Slc4a9					0.0024	-1.913
A_52_P98614	Slc6a2					0.00932	-1.66
A_51_P412024	Slc6a20					0	1.903
A_51_P112734	Slc7a8					0.00338	1.809
A_55_P2135656	Slco1a2			0.0314	1.974	0.0439	1.802
A_52_P255782	Slco2b1					0.0106	-1.568
A_55_P1989653	Slco4a1					0	1.738
A_51_P183812	Slfn12l					0	1.596
A_52_P387458	Slirp					0.00135	-1.846
A_52_P472324	Slpi					0.00135	2.231
A_66_P118356	Smim4					0	-1.664
A_51_P483180	Snx7					0	1.727
A_55_P2812793	Sorcs2			0	1.514	0	1.885
A_51_P404193	Sp5					0.00135	1.771
A_55_P2171764	Spag11b					0.0024	-1.683
A_52_P381484	Spon2					0.0159	1.671
A_51_P358765	Spp1					0.00659	1.642
A_51_P139678	Sprr1a					0.00135	1.513
A_55_P2048855	Sprr2a3					0.00733	2.801
A_51_P143893	Steap4					0	2.081
A_52_P228236	Tfrc					0	1.697
A_51_P212754	Tgfbi					0	1.893
A_52_P627816	Tgm1					0	2.041
A_65_P13588	Thbs1					0	2.278
A_55_P2617245	Tiam1					0.0264	1.524
A_52_P379531	Timeless					0	1.737
A_52_P87713	Timp1			0	4.894	0	15.788
A_55_P1960291	Tjp3			0.00817	1.5	0	1.566
A_51_P224013	Tk1					0.00135	1.501
A_52_P35064	Tm7Sf2					0	1.629
A_51_P258098	Tmem176a			0	1.513	0	1.808
A_55_P1971962	Tmem176b			0	1.548	0	1.78
A_51_P303079	Tmem54			0.00817	1.67	0	1.834
A_55_P2178578	Tmprss4					0	1.553
A_51_P291438	Tnc					0	1.556
A_51_P385099	Tnf					0	1.558
A_52_P228621	Tnfrsf1b					0	1.534
A_55_P2082180	Tnfrsf9			0	2.171	0	3.225
A_51_P257934	Tnfsf13b					0.00135	1.707
A_55_P2197338	Tnfsf13os			0	1.781	0	1.702
A_66_P106167	Tnfsf15			0	1.629
A_51_P497402	Tonsl					0	1.649
A_51_P105709	Trip13					0	1.514
A_52_P391624	Trnp1					0	-1.569
A_55_P2108837	Tuba1c					0	1.613
A_51_P421140	Tubb6					0	1.584
A_51_P398366	Tyms					0	1.61
A_55_P2035286	Uhrf1			0	1.932	0	2.336
A_55_P2932738	Upk1b					0	-1.502
A_52_P520495	Vcam1					0	1.558
A_55_P2501751	Vcan					0	1.885
A_51_P500044	Vldlr					0	-1.801
A_51_P424532	Vnn1			0.00817	1.541	0	1.791
A_51_P265374	Vnn3			0	1.849	0	2.842
A_55_P2129488	Wfdc10					0.00338	-1.543
A_66_P126733	Wfdc16					0.00801	-1.514
A_52_P700056	Wfdc17					0.00586	2.142
A_51_P108226	Wfdc21					0.0232	1.863
A_55_P2126363	Wnt10B					0	-1.734
A_55_P2115981	Xlr5a (Includes Others)					0.0136	1.581
A_55_P1994042	Zbp1					0	1.942
A_55_P2741619	Zkscan3					0.00135	-1.514

## Sheet: c. NRCWE-063
Table S6. Upregulated and downregulated genes in mouse lung tissue after 1 day of exposure to NRCWE-061, NRCWE-062, NRCWE-063, and NRCWE-064.
Table S6c. Upregulated and downregulated genes in mouse lung tissue after exposure to NRCWE-063. FDR adjusted p-value ≤ 0.05 and fold change ≤−1.5 or ≥ 1.5.
		Low dose (6 µg/mouse)		Medium dose (18 µg/mouse)		High dose (54 µg/mouse)
Agilent ID	Gene Symbol	FDR adj p-value	Fold Change	FDR adj p-value	Fold Change	FDR adj p-value	Fold Change
A_66_P111154	1700066B19Rik					0.00505	1.548
A_52_P209277	4921507G05Rik					0	2.731
A_51_P276479	4930486L24Rik	0	1.577
A_55_P1974984	6720475J19Rik	0.00538	-1.617
A_66_P133257	9530026P05Rik					0.0177	-1.564
A_52_P665675	Abca1					0.00214	-1.551
A_52_P222073	Ackr2			0.0244	1.549
A_51_P451574	Acot1	0	-2.051			0.00505	-1.667
A_55_P2504780	Adamts9					0	1.841
A_51_P265571	Adm	0	-1.564	0	-1.657
A_55_P1972605	Adora3					0	1.771
A_66_P119701	Ahsa2	0	1.508			0	1.501
A_52_P418014	Akt1					0.0325	-1.613
A_52_P87843	Aldh1a3					0.0442	1.575
A_51_P494125	Alpl					0	1.641
A_51_P338443	Angptl4	0.00538	-2.743
A_55_P2178553	Apoa2	0	1.679	0	1.704
A_51_P303160	Arg1					0.0309	1.748
A_52_P374897	Arg2					0	1.856
A_52_P267651	Arntl	0	-2.737	0	-2.092	0.0142	-1.565
A_55_P2003824	Asgr1	0.0256	-1.915			0.0037	-1.913
A_66_P124179	Atp6v0d2					0	1.932
A_55_P2806793	Avpr1a	0	-1.907	0	-1.675
A_55_P2274378	Aw549542					0.00214	-1.553
A_52_P299771	Bcl2a1c					0.0037	1.587
A_51_P237668	Bex1					0	-1.567
A_52_P340669	Bhlha15					0	2.098
A_51_P272553	Bhlhe40	0	1.501			0	1.558
A_55_P2137049	C15orf48					0	4.158
A_51_P110301	C3					0	2.62
A_51_P117581	Cables1			0	1.535
A_51_P129803	Cacybp					0	1.507
A_51_P416419	Calr					0	1.645
A_55_P2128929	Cc2d2a	0	-1.504
A_66_P104365	Ccdc167					0	1.597
A_55_P2869822	Ccl11					0.00505	1.557
A_51_P114462	Ccl17					0	4.776
A_52_P249514	Ccl2	0.0127	1.602	0.0161	1.555	0	2.48
A_51_P286737	Ccl2					0	1.964
A_51_P408595	Ccl20					0	2.198
A_52_P18116	Ccl24					0	5.196
A_51_P509573	Ccl4					0.00505	1.717
A_51_P436652	Ccl7					0	3.733
A_51_P464703	Ccl8					0	3.016
A_51_P185660	Ccl9					0	2.404
A_52_P578732	Ccr5					0	1.522
A_51_P172853	Cd14					0	2.139
A_51_P120470	Cd68					0	1.728
A_51_P133612	Cdt1					0	1.54
A_55_P2165839	Cebpe					0.0234	1.866
A_55_P2106150	Cenpk					0	1.617
A_66_P138911	Cfb					0	1.906
A_51_P496905	Cfi					0.039	1.526
A_51_P112966	Ch25h					0	3.694
A_51_P277006	Chst8	0	1.866	0	1.695
A_55_P2813676	Cirbp	0	-1.832	0	-2.057	0	-1.951
A_52_P414065	Clec10a					0	2
A_51_P383032	Clec4d					0.00958	1.785
A_52_P218058	Clec5a					0	1.711
A_51_P246653	Clec7a					0.00505	1.645
A_51_P400699	Clip4					0.00505	1.554
A_55_P2720128	Clmp	0	-1.76	0	-1.553
A_52_P424784	Clstn2					0.0432	-2.326
A_51_P351194	Cnfn	0.00925	-1.667			0.00958	-1.575
A_55_P2043337	Colq					0.0298	-1.526
A_55_P2111302	Cp					0.00631	1.93
A_51_P139108	Cpxm1					0.0037	1.567
A_51_P122246	Creld2					0	1.739
A_51_P171075	Csf2					0	2.362
A_52_P52618	Csf2rb					0	1.586
A_51_P307840	Cst8					0	-2.183
A_51_P284426	Cstad			0	-1.518
A_51_P251357	Ctps1					0	1.754
A_52_P195839	Ctsc					0	1.605
A_55_P1961335	Ctsk					0	2.26
A_51_P106779	Cttnbp2	0.00925	-1.633	0	-1.678
A_55_P2016462	Cxcl10					0.00214	2.449
A_55_P1966204	Cxcl12					0	1.74
A_51_P374198	Cxcl16					0	1.532
A_55_P2811679	Cxcl2					0.0352	1.574
A_52_P232813	Cxcl3					0	2.498
A_55_P1990032	Cxcl6					0	12.411
A_55_P2103249	Cxcr1					0.0037	1.829
A_51_P461429	Cyp7b1					0	1.917
A_51_P109258	Cys1	0	1.908	0.00948	1.618
A_52_P416756	D17h6S56e-5					0	2.022
A_55_P2032079	Dbp	0	4.283	0	3.044
A_55_P2505946	Dclk1					0	2.056
A_55_P2500104	Ddc					0	-1.561
A_55_P2743349	Derl3					0	2.051
A_52_P232637	Dhh	0	1.949	0.00948	1.561	0	1.532
A_52_P627068	Disp2	0	1.889	0.00948	1.695	0	1.64
A_55_P2133405	Dmkn					0.0125	1.918
A_55_P2087984	Dnaja1			0	1.604	0	1.701
A_51_P446469	Dok2					0	1.654
A_51_P473259	Dpyd					0	-1.537
A_55_P2164534	Dtl					0	1.629
A_51_P259029	Dusp26					0	-1.526
A_66_P111334	E030013I19Rik					0.00214	-1.561
A_55_P2723014	Ear12					0.00214	-1.627
A_55_P2004375	Ear2 (Includes Others)					0	2.078
A_55_P2723008	Ear7					0	1.647
A_51_P475378	Echdc3	0	-1.571
A_55_P2797109	Eln	0.00925	-2.036
A_51_P161946	Epop	0	1.52
A_51_P239984	Exo1					0	1.604
A_51_P174961	F10					0	2.544
A_51_P484054	F7					0.00214	1.643
A_52_P87900	Fam107a	0.0127	1.584	0	1.892
A_55_P2108012	Fam78b			0	1.642
A_51_P130095	Fcgr2b					0.00214	1.595
A_51_P353494	Fetub					0.0255	1.715
A_51_P176086	Ffar2					0	1.777
A_55_P2011937	Fignl1					0	2.065
A_55_P1952379	Fkbp5			0	1.662
A_51_P269404	Fmo3					0.0037	-2.577
A_51_P398525	Fn3K	0.0355	-1.527			0.0325	-1.503
A_55_P2491758	Fxyd4					0.00214	3.909
A_55_P2111855	Gale					0.00857	1.525
A_51_P462428	Galnt15					0.00214	-1.824
A_55_P2106175	Gch1					0	1.549
A_55_P1960735	Gdf15					0	1.723
A_55_P1964348	Gdpd2	0.00538	-2.211
A_51_P337089	Gins1					0	1.629
A_55_P2489999	Gins2					0	1.566
A_52_P382886	Gjb2	0.00538	-1.646
A_52_P482251	Gjb6	0	-1.677
A_55_P2338200	Glb1l2					0	-1.556
A_55_P2935296	Gm13571					0	1.65
A_66_P122079	Gm16006	0.0427	-1.75
A_55_P1973352	Gm3579					0	1.699
A_52_P222230	Gm43305					0.0325	1.734
A_55_P2035757	Gm8884					0	1.736
A_51_P438967	Gpnmb					0	2.164
A_55_P2905286	Gpr171					0.0037	1.562
A_55_P2044932	Gpr84					0	1.555
A_51_P356055	Grp	0.00538	1.85
A_55_P2780695	Gsdme					0.0421	-1.502
A_51_P503625	Gsta3					0	-1.606
A_55_P2170454	Gsta5					0.0255	-1.681
A_51_P488739	Hcar2					0	1.844
A_52_P263658	Hes2					0	-1.628
A_55_P2900363	Hlf	0	2.263	0	1.977
A_55_P2912004	Hmgcs2	0.00538	-1.55			0	-1.812
A_55_P2831804	Hpcal4	0.0216	-1.742
A_51_P325836	Hpx					0	2.065
A_55_P2830399	Hsp90b1					0	1.552
A_51_P130332	Hspa12b	0	1.902	0	1.815
A_52_P82741	Hspa1a/Hspa1b					0.0292	1.857
A_66_P118021	Hspa1b					0.0298	1.987
A_55_P2076772	Hspa5					0	1.833
A_55_P2909278	Hspa8	0	2.05	0	1.909	0	1.704
A_55_P2176963	Hsph1	0.0127	1.728	0	1.914	0	1.9
A_55_P1962918	Ifi16					0.0363	1.554
A_55_P2737882	Ifitm10	0	1.522
A_55_P1979674	Ikzf4	0	-1.597
A_52_P577384	Il18bp					0	1.593
A_51_P505617	Il18r1	0	-1.614
A_51_P212782	Il1b					0.00214	1.736
A_55_P2804650	Il1r2					0	1.552
A_52_P431159	Il1rn					0	1.722
A_55_P1964960	Il33					0	1.934
A_55_P2087622	Il4I1					0	2.288
A_55_P1997756	Il6					0.00214	1.87
A_55_P2742291	Itga6	0	1.683
A_55_P2040011	Itga7					0	1.789
A_55_P2077055	Itih4					0	2.219
A_51_P273609	Itpka					0.0447	-1.564
A_51_P493522	Kazald1					0	-1.509
A_52_P128068	Kazn	0	1.532
A_55_P2913680	Kcnip4					0	-1.862
A_55_P2500688	Kcnj2	0.0366	-1.555
A_55_P2935232	Kit	0	1.766	0.0323	1.519
A_55_P2022074	Klf10			0.0323	-1.757
A_65_P07684	Klf9			0	1.525
A_51_P479352	Klhdc9	0.0197	-1.613
A_66_P118600	Lama1			0.0244	1.533
A_51_P510156	Lcn2					0	7.413
A_51_P101929	Lgals3					0.00214	1.597
A_52_P446364	Lgi2					0	2.241
A_55_P1957459	Lilrb4					0	1.86
A_55_P2087118	Ly6a (Includes Others)					0	5.742
A_51_P521052	Ly6k					0.0432	1.504
A_51_P105068	Lypd6b					0.016	1.508
A_52_P686785	Lyve1	0.00538	1.699
A_55_P2090060	Mab21l3					0	1.58
A_51_P418168	Manf					0	1.759
A_55_P2106039	Map3k6	0	2.19	0	2.28	0.0325	1.574
A_52_P168449	Mapk11	0	1.621			0	1.503
A_52_P558713	Mat2a					0	-1.6
A_51_P158210	Mcm2					0	1.729
A_51_P360492	Mcm6					0	1.585
A_55_P2495403	Mmp19					0	2.042
A_51_P255699	Mmp3					0.0152	1.643
A_66_P116441	Ms4a6a					0	2.085
A_55_P2739272	Ms4a8					0.0184	1.509
A_51_P246317	Mt2					0.00214	1.653
A_55_P2745905	Mthfd2					0	1.715
A_55_P2025687	Muc4					0	2.495
A_55_P2007457	Muc5b					0.032	3.469
A_55_P2013665	Mybpc2					0	1.685
A_55_P2093232	Myh7					0	-1.652
A_55_P2729090	Myo10	0.0307	-1.582
A_55_P2714682	Nav2			0.0358	-1.573	0.00214	-1.719
A_55_P2161475	Nectin4					0.0352	-1.777
A_55_P2489824	Nfe2l3	0.00925	-1.668
A_55_P2016959	Nme2					0	1.502
A_55_P2304507	Noxa1					0.0342	1.518
A_55_P2111907	Noxo1					0	3.72
A_55_P2807962	Npr3	0	2.489	0	2.774
A_55_P2103452	Npy1r	0	1.553	0	1.528
A_51_P223776	Nr1d1	0	2.061	0	1.852
A_52_P303891	Nr1d2	0	2.191	0	1.837
A_51_P296796	Nt5dc2	0.00925	1.504
A_51_P519251	Nupr1	0	-1.625
A_52_P324754	Nupr2					0	-1.539
A_51_P254262	Nxph3	0	-1.723	0	-1.581	0	-1.572
A_51_P295085	Ogn					0	-1.589
A_55_P2734867	Orm1 (Includes Others)					0	4.162
A_52_P579448	Oscp1	0.0275	-1.521
A_55_P2830665	Osm					0	1.782
A_52_P587738	P2Ry2					0	1.504
A_51_P324450	Pbp2					0	1.541
A_51_P396351	Pcna					0	1.507
A_51_P328300	Pdia4					0	1.559
A_55_P2053491	Pdia6					0	1.655
A_55_P2737144	Per2	0	3.095	0	2.317
A_55_P2752088	Per3	0	2.303	0	1.781
A_55_P2645225	Pigr					0.0177	1.587
A_51_P108659	Pon1					0.0192	-2.249
A_52_P1069478	Prcd			0	1.526
A_51_P170959	Proz					0	2.271
A_55_P1994309	Ptgir					0	1.622
A_51_P279100	Ptgs1					0	1.577
A_51_P148105	Rad51					0	1.64
A_55_P2107155	Rasd2			0.0244	1.52
A_51_P340699	Rasl11a	0	-1.988	0	-1.679
A_55_P2728536	Rbak					0.00214	-1.825
A_51_P246677	Rec8	0.0355	-1.535
A_55_P2011146	Reep1	0.00538	1.527
A_51_P257951	Retnla					0.0465	1.574
A_51_P226269	Rgcc	0.00538	1.559	0	1.629
A_51_P260683	Rgs1					0	1.995
A_52_P354123	Rhebl1	0	1.507
A_51_P455338	Rnase2					0	-1.9
A_51_P111164	Rnd1					0	-1.679
A_51_P513311	Rxrg	0	-1.969	0.0209	-1.788
A_52_P318673	Saa1					0	5.295
A_66_P106131	Saa3					0	29.66
A_52_P682382	Scd	0.0355	-1.615
A_55_P2060429	Scube2					0	-1.632
A_51_P280446	Sdf2l1					0	2.431
A_55_P2729393	Sema3e					0	-1.874
A_51_P159453	Serpina3					0	2.381
A_55_P1993933	Serpinb1c					0	9.955
A_55_P2903199	Serpinb9					0	1.534
A_51_P468140	Serpind1					0.00214	1.61
A_55_P2033376	Shisal1	0	-1.506
A_51_P489720	Slc16a11					0.0037	-1.861
A_55_P1964752	Slc23a3					0.00214	1.555
A_51_P224164	Slc26a4					0	9.015
A_52_P98614	Slc6a2			0.0389	1.584
A_51_P412024	Slc6a20					0	2.084
A_55_P2135656	Slco1a2					0.0037	2.111
A_55_P2908509	Sod2					0	1.569
A_55_P2812793	Sorcs2					0	1.565
A_51_P404193	Sp5					0	1.627
A_55_P2171764	Spag11b					0.0115	-1.544
A_51_P501248	Sphk1	0	1.837	0	1.645
A_52_P381484	Spon2	0	-3.277	0	-2.014
A_55_P2048855	Sprr2a3					0.024	2.419
A_55_P1975185	Sqle	0.00538	-1.543
A_51_P143893	Steap4					0	1.686
A_55_P2033435	Stra6l					0	1.577
A_55_P2736215	Syne1	0.00925	-1.549
A_55_P2846364	Tacstd2	0	-1.51
A_52_P485573	Tef	0	2.188	0.00948	1.763
A_55_P2168168	Tex11	0	1.718	0	1.817
A_52_P127925	Tfec					0	1.552
A_52_P228236	Tfrc					0	1.745
A_51_P212754	Tgfbi					0	1.572
A_52_P627816	Tgm1					0.00857	1.521
A_52_P87713	Timp1					0	7.064
A_52_P418489	Tinagl1	0	1.656
A_52_P799815	Tmem171	0	-1.575
A_51_P258098	Tmem176a					0	1.666
A_55_P1971962	Tmem176b					0	1.611
A_66_P121255	Tmem200b	0	1.719
A_51_P385099	Tnf					0	1.556
A_55_P2082180	Tnfrsf9					0	2.81
A_55_P2197338	Tnfsf13os					0	1.61
A_66_P106167	Tnfsf15					0	1.696
A_66_P123138	Tox2	0	1.566
A_51_P509609	Tspan4	0	2.379	0	1.73
A_51_P398366	Tyms					0	1.501
A_55_P1953573	Tyrp1					0.0298	-1.719
A_55_P2035286	Uhrf1					0	2.257
A_55_P2156425	Upk1a					0.0037	-1.607
A_66_P127978	Upp1	0.00925	1.566
A_55_P2501751	Vcan					0	1.559
A_51_P424532	Vnn1					0	2.18
A_51_P265374	Vnn3					0	2.401
A_66_P136186	Wee1	0	1.602	0	1.536
A_51_P487073	Wfdc12					0	1.595
A_52_P700056	Wfdc17					0.00631	2.025
A_51_P108226	Wfdc21					0	2.389
A_55_P2024155	Zbtb16			0.0244	2.15
A_52_P469956	Zc3H6					0	-1.519
A_66_P126311	Zfp41					0.0292	-1.749
A_55_P2830411	Znf462	0	-1.774	0	-1.599

## Sheet: d. NRCWE-064
Table S6. Upregulated and downregulated genes in mouse lung tissue after 1 day of exposure to NRCWE-061, NRCWE-062, NRCWE-063, and NRCWE-064.
Table S6d. Upregulated and downregulated genes in mouse lung tissue after exposure to NRCWE-064. FDR adjusted p-value ≤ 0.05 and fold change ≤−1.5 or ≥ 1.5.
		Low dose (6 µg/mouse)		Medium dose (18 µg/mouse)		High dose (54 µg/mouse)
Agilent ID	Gene Symbol	FDR adj p-value	Fold Change	FDR adj p-value	Fold Change	FDR adj p-value	Fold Change
A_55_P2202357	0710001A04Rik					0.0234	1.961
A_66_P111154	1700066B19Rik					0	1.901
A_51_P309488	1810058N15Rik					0.0157	1.607
A_51_P191893	2410022M11Rik			0	1.578
A_52_P209277	4921507G05Rik					0.0081	2.361
A_66_P133257	9530026P05Rik					0	-1.726
A_51_P123625	Acod1					0	2.239
A_51_P451574	Acot1	0	-1.829			0	-2.133
A_51_P268154	Acsl4					0	1.52
A_66_P100625	Acss2os			0	-2.319
A_55_P2340448	Acss3					0.0109	-1.52
A_55_P1972605	Adora3					0.00269	1.569
A_55_P2509368	Ai314278			0.0356	-2.028
A_52_P87843	Aldh1a3					0	1.915
A_51_P494125	Alpl					0	1.575
A_51_P338443	Angptl4	0	-2.79
A_51_P303160	Arg1					0.0261	1.808
A_52_P374897	Arg2					0	1.61
A_52_P267651	Arntl	0	-2.061
A_55_P2003824	Asgr1					0.0188	-1.829
A_66_P124179	Atp6v0d2					0.00269	1.688
A_55_P2110758	B430306N03Rik					0.0147	1.736
A_51_P419286	Batf3					0.00269	1.579
A_55_P1971599	Bcan					0.0188	-1.686
A_51_P309307	Bcl2l15					0	1.553
A_52_P340669	Bhlha15					0	1.71
A_51_P272553	Bhlhe40					0	1.576
A_55_P2137049	C15orf48					0	4.671
A_51_P110301	C3					0	2.64
A_55_P2508153	Carmn			0	1.897
A_66_P104365	Ccdc167					0	1.566
A_51_P114462	Ccl17			0.0356	2.554	0	5.139
A_52_P249514	Ccl2					0	2.414
A_51_P286737	Ccl2					0	2.49
A_51_P408595	Ccl20					0	2.439
A_52_P18116	Ccl24					0	9.258
A_51_P140710	Ccl3L3					0	1.625
A_51_P509573	Ccl4					0	2.873
A_51_P436652	Ccl7					0	4.383
A_51_P464703	Ccl8					0	2.77
A_51_P185660	Ccl9					0	2.157
A_51_P157042	Ccn2					0.0285	-1.526
A_51_P291501	Ccno					0.0225	1.586
A_51_P172853	Cd14					0	2.01
A_55_P1960376	Cd209					0.0134	1.503
A_51_P120470	Cd68					0	1.597
A_51_P133612	Cdt1					0	1.541
A_55_P2106150	Cenpk					0	1.533
A_66_P138911	Cfb					0	1.784
A_51_P112966	Ch25h			0.0356	2.076	0	3.51
A_55_P2120354	Cib2					0	-1.52
A_51_P490456	Cidec					0.00657	-2.766
A_52_P414065	Clec10a					0	1.823
A_51_P383032	Clec4d					0	1.996
A_52_P218058	Clec5a					0	2.103
A_51_P246653	Clec7a					0	1.713
A_55_P2142028	Clip4					0	1.715
A_55_P2717459	Col3a1			0	-1.784
A_55_P2111302	Cp					0	2.345
A_51_P124345	Cpne5					0	-1.523
A_51_P139108	Cpxm1					0.0081	1.539
A_51_P122246	Creld2					0	1.551
A_51_P171075	Csf2					0	2.283
A_51_P307840	Cst8					0.00269	-1.833
A_51_P251357	Ctps1					0	1.696
A_52_P660945	Ctsf					0	-1.526
A_55_P1961335	Ctsk			0	1.707	0	2.197
A_55_P2016462	Cxcl10					0	3.663
A_55_P1966204	Cxcl12					0	2.019
A_55_P2811679	Cxcl2					0	1.987
A_52_P232813	Cxcl3					0	2.06
A_55_P1990032	Cxcl6			0	4.533	0	14.636
A_55_P2103249	Cxcr1					0.0215	1.668
A_52_P559975	Cxcr2					0	1.633
A_51_P461429	Cyp7b1					0	1.998
A_52_P416756	D17h6S56e-5					0	2.207
A_55_P2032079	Dbp	0	3.145
A_55_P2505946	Dclk1					0	2.253
A_55_P2743349	Derl3					0.00957	1.712
A_55_P2133405	Dmkn					0.0188	1.855
A_51_P153486	Dnajb1			0.0356	-1.535
A_51_P446469	Dok2					0	1.688
A_51_P473259	Dpyd					0.00269	-1.625
A_55_P2101757	Dscc1					0	1.504
A_55_P2164534	Dtl					0	1.888
A_66_P111334	E030013I19Rik					0.00269	-1.584
A_55_P2723014	Ear12					0	-1.816
A_52_P412585	Ear2 (Includes Others)					0.00269	-2.054
A_51_P367866	Egr1			0.0356	2.332
A_51_P174961	F10					0	2.16
A_51_P484054	F7					0.0197	1.506
A_51_P487818	Fabp1					0.00657	-2.871
A_55_P1953387	Fabp5					0	1.598
A_55_P2025891	Fam71e2					0.046	1.611
A_51_P353494	Fetub					0.0302	1.726
A_55_P1984830	Fgl1					0.0206	1.676
A_55_P2011937	Fignl1					0	2.059
A_51_P269404	Fmo3					0.0157	-2.292
A_55_P2491758	Fxyd4					0.00657	3.565
A_55_P2111855	Gale					0	1.616
A_51_P462428	Galnt15					0.0157	-1.559
A_55_P1960735	Gdf15			0	1.541	0	1.675
A_51_P337089	Gins1					0	1.638
A_55_P2489999	Gins2					0	1.591
A_55_P2086448	Gm10385					0.0399	1.597
A_55_P2035757	Gm8884					0.00269	1.552
A_51_P438967	Gpnmb			0	1.629	0	1.908
A_66_P131487	Gpr26					0.0215	1.57
A_51_P488739	Hcar2					0	2.144
A_52_P263658	Hes2					0	-1.628
A_66_P127452	Hk3					0	1.627
A_55_P2900363	Hlf	0	1.91
A_55_P2912004	Hmgcs2					0	-1.979
A_55_P2757433	Hmox1					0	1.678
A_51_P325836	Hpx					0	2.598
A_55_P2076772	Hspa5					0	1.626
A_52_P577384	Il18bp					0	1.574
A_55_P2804650	Il1r2					0	1.803
A_52_P431159	Il1rn					0	1.859
A_55_P1964960	Il33					0.00957	1.747
A_55_P2087622	Il4I1			0	1.821	0	2.636
A_55_P1997756	Il6					0	2.656
A_55_P2040011	Itga7					0	2.008
A_55_P2077055	Itih4					0	2.359
A_51_P159194	Junb			0	1.612
A_66_P121196	Katnb1					0.0081	1.51
A_66_P103584	Kcng4					0.0168	1.639
A_55_P2913680	Kcnip4					0	-1.896
A_55_P2081050	Kcnj13					0	-1.535
A_55_P2500688	Kcnj2			0.0356	-1.701	0	-1.862
A_51_P213544	Klf4					0	-1.77
A_55_P2003414	Kng1					0	2.324
A_55_P1968799	Krtap1-5					0.031	1.962
A_51_P370458	Krtap17-1					0.0188	-1.505
A_51_P510156	Lcn2			0	2.275	0	8.977
A_52_P446364	Lgi2					0	2.09
A_55_P1957459	Lilrb4					0	1.963
A_51_P346938	Lrg1					0	1.579
A_55_P2015292	Ltc4s					0.0197	-1.514
A_55_P2087118	Ly6a (Includes Others)					0	6.336
A_55_P2090060	Mab21l3					0	1.832
A_51_P418168	Manf					0	1.577
A_55_P2063626	Matk					0	1.753
A_51_P158210	Mcm2					0	1.766
A_51_P360492	Mcm6					0	1.562
A_66_P118891	Mcpt-Ps1					0.00269	1.586
A_51_P464918	Mefv					0	1.66
A_55_P2495403	Mmp19					0	1.717
A_51_P255699	Mmp3					0.0432	1.565
A_66_P116441	Ms4a6a					0	2.086
A_51_P246317	Mt2					0	1.78
A_55_P2745905	Mthfd2					0	1.634
A_51_P211506	Muc20					0.00957	1.823
A_55_P2025687	Muc4					0.00269	2.479
A_55_P2007457	Muc5b					0.0177	3.676
A_55_P2013665	Mybpc2					0	1.652
A_55_P2093232	Myh7					0	-1.765
A_55_P2027668	Neto1					0.0472	1.86
A_55_P2304507	Noxa1					0.0109	1.635
A_55_P2111907	Noxo1					0	4.165
A_55_P2737692	Npy1r					0.0399	1.773
A_51_P223776	Nr1d1	0	1.968
A_55_P2148534	Nr1d2	0.0439	1.694
A_55_P2822982	Nrn1					0.00269	-1.503
A_51_P295085	Ogn					0	-1.561
A_55_P2734867	Orm1 (Includes Others)					0	4.927
A_66_P136559	Osbpl5					0.042	1.785
A_55_P2830665	Osm					0	1.763
A_51_P324450	Pbp2					0	1.551
A_65_P01319	Pde4b	0.0439	-1.924
A_55_P2053491	Pdia6					0	1.509
A_55_P2746348	Pdpn					0	1.635
A_66_P137063	Per3	0	1.826
A_55_P2645225	Pigr					0.00475	1.703
A_55_P2842483	Plau					0	1.509
A_66_P122294	Pnpla5					0.0109	-1.566
A_55_P2009673	Ppp1r14d					0.00957	1.927
A_51_P170959	Proz					0.00269	2.151
A_55_P1994309	Ptgir			0	1.642	0	1.648
A_51_P279100	Ptgs1					0	1.719
A_51_P148105	Rad51					0.00269	1.582
A_51_P348665	Ramp1					0	-1.623
A_51_P340699	Rasl11a	0	-2.038	0	-1.641
A_51_P257951	Retnla					0.00269	1.827
A_51_P260683	Rgs1					0.0121	1.637
A_51_P455338	Rnase2					0	-1.931
A_66_P113539	Rsrp1			0	-1.519
A_51_P419226	S100a14					0.0215	1.592
A_51_P105078	S100a4					0	1.694
A_52_P318673	Saa1					0	8.961
A_66_P106131	Saa3					0	61.21
A_51_P280446	Sdf2l1					0	2.006
A_51_P159453	Serpina3					0	2.536
A_55_P2142232	Serpina3g (Includes Others)					0	1.946
A_55_P1993933	Serpinb1c					0	9.231
A_55_P2903199	Serpinb9					0	1.523
A_51_P468140	Serpind1					0.00269	1.569
A_55_P2729383	Sfpq			0	-1.778
A_55_P2823856	Siglec8					0.0147	-1.819
A_51_P432180	Slc16a6					0	1.577
A_51_P224164	Slc26a4					0	10.107
A_51_P412024	Slc6a20					0	1.81
A_55_P2135656	Slco1a2					0	2.419
A_52_P255782	Slco2b1					0.00269	-1.616
A_55_P1989653	Slco4a1					0	1.59
A_55_P2908509	Sod2					0	1.606
A_55_P2812793	Sorcs2					0	1.567
A_51_P404193	Sp5					0	1.63
A_55_P2171764	Spag11b					0.0109	-1.585
A_52_P381484	Spon2	0	-2.158
A_51_P358765	Spp1					0.0134	1.572
A_55_P2048855	Sprr2a3					0.034	2.321
A_51_P143893	Steap4					0.0081	1.622
A_55_P2033435	Stra6l					0	1.532
A_55_P1979893	Tef	0	1.79
A_55_P2160726	Tfcp2					0.0479	1.535
A_52_P228236	Tfrc					0	1.66
A_51_P212754	Tgfbi					0	1.587
A_52_P627816	Tgm1					0.00269	1.57
A_65_P13588	Thbs1					0	1.744
A_52_P379531	Timeless					0	1.578
A_52_P87713	Timp1					0	9.766
A_55_P1960291	Tjp3					0	1.616
A_51_P452629	Tlr2					0.00475	1.506
A_51_P258098	Tmem176a					0	1.65
A_55_P1971962	Tmem176b					0	1.653
A_51_P303079	Tmem54					0.00269	1.65
A_55_P2082180	Tnfrsf9					0	3.237
A_55_P2197338	Tnfsf13os					0	1.6
A_66_P106167	Tnfsf15					0	1.574
A_51_P509609	Tspan4	0	1.504
A_55_P2108837	Tuba1c					0	1.52
A_55_P2035286	Uhrf1					0	2.311
A_55_P2156425	Upk1a					0.00269	-1.572
A_55_P2501751	Vcan					0	1.506
A_65_P01426	Vgll4			0.0356	-1.663
A_51_P424532	Vnn1					0	2.081
A_51_P265374	Vnn3					0	2.54
A_52_P700056	Wfdc17					0	2.25
A_51_P108226	Wfdc21					0.0253	1.812
