# Supplementary material for: Single-Walled vs. Multi-Walled Carbon Nanotubes: Influence of Physico-Chemical Properties on Toxicogenomics Responses in Mouse Lungs
Source: Nanomaterials (Basel). 2023 Mar 15;13(6):1059. doi: 10.3390/nano13061059 (PMC10057402; doi:10.3390/nano13061059)
Supplement: Supplementary file 1 [file nanomaterials-13-01059-s001.zip › Table S7.xlsx]

## Sheet: a. NRCWE-055
Table S7. Perturbed IPA canonical pathways for NRCWE-055, NRCWE-056, and NRCWE-057 after 1 day of exposure.
Table S7a. Perturbed IPA canonical pathways for NRCWE-055 at 54 µg/mouse. Pathways were considered significantly perturbed if the −log (p-value) was ≥ 1.3 .
Ingenuity Canonical Pathways	−log (p-value)	z-score	Molecules
LXR/RXR Activation	10.6	0	ABCA1,ABCG1,ARG2,C3,CD14,HPX,IL1B,IL33,IL6,ITIH4,KNG1,MLXIPL,NFKB2,NOS2,PON1,SAA1,TNF
Agranulocyte Adhesion and Diapedesis	9.34		ACTA2,CCL17,Ccl2,CCL3L3,CCL4,Ccl7,Ccl8,Ccl9,CXCL10,CXCL12,Cxcl3,CXCL6,CXCR1,IL1B,IL33,MMP12,MMP3,MYH7,TNF
Granulocyte Adhesion and Diapedesis	8.44		CCL17,Ccl2,CCL3L3,CCL4,Ccl7,Ccl8,Ccl9,CXCL10,CXCL12,Cxcl3,CXCL6,FPR1,IL1B,IL33,MMP12,MMP3,TNF
Role of IL-17F in Allergic Inflammatory Airway Diseases	6.38	2.646	CCL4,CREB5,CSF2,CXCL10,CXCL6,IL1B,IL6,NFKB2
IL-10 Signaling	6.24		ARG2,CCR5,CD14,FCGR2B,IL1B,IL33,IL6,MAPK13,NFKB2,TNF
Role of Hypercytokinemia/hyperchemokinemia in the Pathogenesis of Influenza	6.23	2.236	CCL4,CCR5,CXCL10,IL1B,IL33,IL6,TNF
Acute Phase Response Signaling	6.07	2.887	C3,CFB,CP,HPX,IL1B,IL33,IL6,ITIH4,MAPK13,NFKB2,SAA1,SERPINA3,SERPIND1,SOCS1,TNF
Xenobiotic Metabolism AHR Signaling Pathway	6.06	0	ALDH1A1,ALDH1A3,ALDH6A1,GSTA3,GSTA5,IL1B,IL6,NFKB2,PON1,TNF
LPS/IL-1 Mediated Inhibition of RXR Function	5.68	1.633	ABCA1,ABCG1,ALDH1A1,ALDH1A3,ALDH6A1,CD14,FABP1,FMO3,GSTA3,GSTA5,HMGCS2,IL1B,IL33,IL4I1,SLCO1A2,TNF
Communication between Innate and Adaptive Immune Cells	5.34		CCL3L3,CCL4,Ccl9,CSF2,CXCL10,IL1B,IL33,IL6,TNF
Activation of IRF by Cytosolic Pattern Recognition Receptors	5.27	1.414	DHX58,IFIT2,IL6,IRF7,ISG15,NFKB2,TNF,ZBP1
Differential Regulation of Cytokine Production in Macrophages and T Helper Cells by IL-17A and IL-17F	5.18		CCL4,CSF2,IL1B,IL6,TNF
Differential Regulation of Cytokine Production in Intestinal Epithelial Cells by IL-17A and IL-17F	4.88		CCL4,CSF2,IL1B,LCN2,TNF
Systemic Lupus Erythematosus In B Cell Signaling Pathway	4.71	2.5	CSF2,FCGR2B,FOXO6,IFIT2,IFIT3,IL1B,IL33,IL6,IRF7,ISG15,LILRB4,MALT1,NFKB2,STING1,TNF,TRAF1
FXR/RXR Activation	4.15		C3,HPX,IL1B,IL33,ITIH4,KNG1,MLXIPL,PON1,SAA1,TNF
Role of Pattern Recognition Receptors in Recognition of Bacteria and Viruses	4.07	2.449	C3,CLEC7A,CSF2,IL1B,IL33,IL6,IRF7,NFKB2,OAS1,Oas1f,TNF
Xenobiotic Metabolism Signaling	3.88		ALDH1A1,ALDH1A3,ALDH6A1,Ces1e,FMO3,GCLC,GSTA3,GSTA5,IL1B,IL4I1,IL6,MAPK13,NFKB2,NOS2,TNF
Atherosclerosis Signaling	3.47		CCR2,CXCL12,IL1B,IL33,IL6,MMP3,NFKB2,PON1,TNF
Crosstalk between Dendritic Cells and Natural Killer Cells	3.45	2.449	ACTA2,CD209,CSF2,CSF2RB,IL6,NFKB2,TNF
Toll-like Receptor Signaling	3.37	2	CD14,IL1B,IL33,MAPK13,NFKB2,TNF,TRAF1
Tumor Microenvironment Pathway	3.33	3.317	ARG1,CSF2,CXCL12,FOXO6,IL1B,IL6,MMP12,MMP3,NFKB2,NOS2,TNF
Role of Cytokines in Mediating Communication between Immune Cells	3.23		CSF2,IL1B,IL33,IL6,TNF
VDR/RXR Activation	3.12	2	CD14,CEBPA,CSF2,CXCL10,IGFBP5,IGFBP6,WT1
Aryl Hydrocarbon Receptor Signaling	2.96	2	ALDH1A1,ALDH1A3,ALDH6A1,GSTA3,GSTA5,IL1B,IL6,NFKB2,TNF
Xenobiotic Metabolism PXR Signaling Pathway	2.94	-0.632	ALDH1A1,ALDH1A3,ALDH6A1,Ces1e,GSTA3,GSTA5,IL4I1,NOS2,PPP1R14D,PRKAR2B
IL-23 Signaling Pathway	2.82	1.342	CSF2,IL1B,NFKB2,RORC,TNF
Role of Macrophages, Fibroblasts and Endothelial Cells in Rheumatoid Arthritis	2.71		ADAMTS4,CEBPA,CEBPE,CREB5,CSF2,CXCL12,IL1B,IL33,IL6,MMP3,NOS2,SOCS1,TNF,TRAF1
Hepatic Cholestasis	2.71		CD14,CSF2,CYP7B1,IL1B,IL33,IL6,NFKB2,PRKAR2B,SLCO1A2,TNF
TREM1 Signaling	2.68	2.449	CSF2,FCGR2B,IL1B,IL6,NFKB2,TNF
IL-6 Signaling	2.58	1.89	CD14,IL1B,IL33,IL6,MAPK13,NFKB2,SOCS1,TNF
Neuroinflammation Signaling Pathway	2.57	3.317	CREB5,CXCL10,CXCL12,GABRA3,IL1B,IL6,IRF7,MAPK13,MMP3,NFKB2,NOS2,SNCA,TNF
Dendritic Cell Maturation	2.56	2.828	CREB5,CSF2,FCGR2B,IL1B,IL33,IL6,MAPK13,NFKB2,TNF
Type I Diabetes Mellitus Signaling	2.52	1.342	CPE,IL1B,MAPK13,NFKB2,NOS2,SOCS1,TNF
IL-17 Signaling	2.52		CXCL10,IL6,MAPK13,MMP3,MUC5B,NOS2
Iron homeostasis signaling pathway	2.43		ATP6V0D2,CP,GDF15,HPX,IL6,NUBP1,SLC39A14,TFRC
Altered T Cell and B Cell Signaling in Rheumatoid Arthritis	2.41		CSF2,IL1B,IL33,IL6,NFKB2,TNF
Unfolded protein response	2.39	1.342	CALR,CEBPA,CEBPE,HSPA5,PDIA6
MSP-RON Signaling Pathway	2.39		ACTA2,CCR2,CSF2RB,NOS2,TNF
PXR/RXR Activation	2.26		ALDH1A1,HMGCS2,IL6,PRKAR2B,TNF
Breast Cancer Regulation by Stathmin1	2.25	1.789	ADORA2A,ADORA3,ADRB3,CCR2,CCR5,CREB5,CXCR1,FFAR2,FPR1,GPR84,GPRC5B,HCAR2,NFKB2,PPP1R14D,PRKAR2B,PTAFR,PTGIR,TUBA1C,TUBB2A,TUBB6
Phagosome Maturation	2.24		ATP6V0D2,CALR,CTSC,CTSF,CTSK,TUBA1C,TUBB2A,TUBB6
IL-17A Signaling in Airway Cells	2.23	2	CXCL6,IL6,MAPK13,MUC5B,NFKB2
Osteoarthritis Pathway	2.2	2.333	ADAMTS4,ALPL,CREB5,DCN,IL1B,MMP12,MMP3,NFKB2,NOS2,TNF
Th17 Activation Pathway	2.14	1.342	CSF2,IL1B,IL6,NFKB2,RORC
Remodeling of Epithelial Adherens Junctions	2.11		ACTA2,NME1,TUBA1C,TUBB2A,TUBB6
Hepatic Fibrosis / Hepatic Stellate Cell Activation	2.1		ACTA2,CCR5,CD14,IGFBP5,IL1B,IL6,MYH7,NFKB2,TNF
HMGB1 Signaling	2.03	2.449	CSF2,IL1B,IL33,IL6,MAPK13,NFKB2,RND1,TNF
Sertoli Cell-Sertoli Cell Junction Signaling	1.97		ACTA2,MAPK13,NOS2,PRKAR2B,TJP3,TNF,TUBA1C,TUBB2A,TUBB6
MSP-RON Signaling In Macrophages Pathway	1.89	0	ARG1,CREB5,NFKB2,NOS2,SOCS1,TNF
Dopamine Receptor Signaling	1.88		GCH1,IL4I1,PPP1R14D,PPP1R1B,PRKAR2B
Antioxidant Action of Vitamin C	1.87	-2.236	CSF2,CSF2RB,MAPK13,NFKB2,SLC23A3,TNF
Airway Pathology in Chronic Obstructive Pulmonary Disease	1.84		CSF2,IL1B,IL33,IL6,LCN2,TNF
Gαs Signaling	1.82	0.816	ADORA2A,ADRB3,CREB5,HCAR2,PRKAR2B,PTGIR
Production of Nitric Oxide and Reactive Oxygen Species in Macrophages	1.69	0.378	ARG2,MAPK13,NFKB2,NOS2,PON1,PPP1R14D,RND1,TNF
AMPK Signaling	1.69	-0.378	ACACB,ADRB3,CHRNA7,CREB5,FOXO6,IRS1,MAPK13,PRKAR2B,RAB27A
Role of Tissue Factor in Cancer	1.67		CSF2,F10,HBEGF,IL1B,MAPK13,PDIA6
Role of Osteoblasts, Osteoclasts and Chondrocytes in Rheumatoid Arthritis	1.67		ADAMTS4,ALPL,CSF2,CTSK,IL1B,IL33,IL6,MMP3,TNF
ILK Signaling	1.64	0.816	ACTA2,CREB5,IRS1,MYH7,NFKB2,NOS2,RND1,TNF
Adrenomedullin signaling pathway	1.48	1.414	C3,IL1B,IL33,MAPK13,MATK,NFKB2,PRKAR2B,TNF
Xenobiotic Metabolism CAR Signaling Pathway	1.46	-1.134	ALDH1A1,ALDH1A3,ALDH6A1,FMO3,GSTA3,GSTA5,NOS2
Erythropoietin Signaling	1.44	-1.134	CSF2,CSF2RB,IL1B,IL33,IL6,NFKB2,TNF
Tight Junction Signaling	1.43		ACTA2,CEBPA,MYH7,NFKB2,PRKAR2B,TJP3,TNF
Insulin Secretion Signaling Pathway	1.42	1	ABCC9,Arxes1/Arxes2,CPE,CREB5,MAPK13,PRKAR2B,SEC61B,SEC61G,SSR4
Sumoylation Pathway	1.4	0	CEBPA,NFKB2,RFC4,RND1,SNCA
Coronavirus Pathogenesis Pathway	1.37	0.816	IL1B,IL6,IRF7,MAPK13,NFKB2,STING1
Systemic Lupus Erythematosus Signaling	1.37		FCGR2B,IL1B,IL33,IL6,KNG1,PRPF19,TNF
IGF-1 Signaling	1.33		IGFBP5,IGFBP6,IRS1,PRKAR2B,SOCS1

## Sheet: b. NRCWE-056
Table S7. Perturbed IPA canonical pathways for NRCWE-055, NRCWE-056, and NRCWE-057 after 1 day of exposure.
Table S7b. Perturbed IPA canonical pathways for NRCWE-056 at 54 µg/mouse. Pathways were considered significantly perturbed if the −log (p-value) was ≥ 1.3 .
Ingenuity Canonical Pathways	−log(p-value)	z-score	Molecules
Agranulocyte Adhesion and Diapedesis	11.4		ACTA2,CCL17,Ccl2,CCL3L3,CCL4,Ccl7,Ccl8,Ccl9,CXCL10,CXCL12,Cxcl3,CXCL6,CXCR1,IL33,MMP12,MMP3,MYH7,Ppbp
Granulocyte Adhesion and Diapedesis	9.14		CCL17,Ccl2,CCL3L3,CCL4,Ccl7,Ccl8,Ccl9,CXCL10,CXCL12,Cxcl3,CXCL6,IL33,MMP12,MMP3,Ppbp
Cell Cycle Control of Chromosomal Replication	7.65	3	CDT1,LIG1,MCM2,MCM3,MCM4,MCM5,MCM6,MCM7,PRIM1
LXR/RXR Activation	4.97	1	ABCA1,C3,CD14,HPX,IL33,IL6,ITIH4,KNG1,SAA1
Role of Hypercytokinemia/hyperchemokinemia in the Pathogenesis of Influenza	4.67		CCL4,CCR5,CXCL10,IL33,IL6
Communication between Innate and Adaptive Immune Cells	4.67		CCL3L3,CCL4,Ccl9,CSF2,CXCL10,IL33,IL6
Acute Phase Response Signaling	4.21	2.828	C3,CFB,CP,HPX,IL33,IL6,ITIH4,MAPK13,SAA1,SERPINA3
Role of IL-17F in Allergic Inflammatory Airway Diseases	3.98	2	CCL4,CSF2,CXCL10,CXCL6,IL6
IL-10 Signaling	3.66		CCR5,CD14,FCGR2B,IL33,IL6,MAPK13
Iron homeostasis signaling pathway	3.55		ATP6V0D2,CP,GDF15,HPX,IL6,PDGFRA,SLC25A37,TFRC
Role of Pattern Recognition Receptors in Recognition of Bacteria and Viruses	3.34		C3,CLEC7A,CSF2,IL33,IL6,IRF7,OAS1,Oas1f
Activation of IRF by Cytosolic Pattern Recognition Receptors	3.31	1.342	IFIT2,IL6,IRF7,ISG15,ZBP1
Systemic Lupus Erythematosus In B Cell Signaling Pathway	2.92	1.265	CARD11,CSF2,FCGR2B,IFIT2,IFIT3,IL33,IL6,IRF7,ISG15,LILRB4
NER Pathway	2.82	2.236	CHAF1A,CHAF1B,LIG1,POLE2,PRIM1,RFC4
IL-17 Signaling	2.58		CXCL10,IL6,MAPK13,MMP3,MUC5B
Role of Tissue Factor in Cancer	2.49		CSF2,F10,F7,HBEGF,MAPK13,PDIA6
FXR/RXR Activation	2.45		C3,HPX,IL33,ITIH4,KNG1,SAA1
LPS/IL-1 Mediated Inhibition of RXR Function	2.32		ABCA1,ALDH6A1,CD14,FABP1,HMGCS2,IL33,IL4I1,SLCO1A2
Kinetochore Metaphase Signaling Pathway	2.04		CENPH,CENPK,PPP1R14D,SKA1,SPC25
Role of Osteoblasts, Osteoclasts and Chondrocytes in Rheumatoid Arthritis	1.71		ADAMTS4,ALPL,CSF2,CTSK,IL33,IL6,MMP3
Tumor Microenvironment Pathway	1.64	2.449	ARG1,CSF2,CXCL12,IL6,MMP12,MMP3
Hepatic Cholestasis	1.61		CD14,CSF2,CYP7B1,IL33,IL6,SLCO1A2
Hepatic Fibrosis / Hepatic Stellate Cell Activation	1.55		ACTA2,CCR5,CD14,IL6,MYH7,PDGFRA
Dendritic Cell Maturation	1.33	2	CSF2,FCGR2B,IL33,IL6,MAPK13

## Sheet: c. NRCWE-057
Table S7. Perturbed IPA canonical pathways for NRCWE-055, NRCWE-056, and NRCWE-057 after 1 day of exposure.
Table S7c. Perturbed IPA canonical pathways for NRCWE-057 at 54 µg/mouse. Pathways were considered significantly perturbed if the −log (p-value) was ≥ 1.3 .
Ingenuity Canonical Pathways	−log(p-value)	z-score	Molecules
Agranulocyte Adhesion and Diapedesis	10.3		ACTA2,CCL17,Ccl2,CCL3L3,CCL4,Ccl7,Ccl8,Ccl9,CXCL10,CXCL12,Cxcl3,CXCL6,CXCR1,IL1B,IL33,MMP12,MMP3,MYH7,TNF
LXR/RXR Activation	9.43	0.258	ABCA1,AHSG,ARG2,C3,CD14,HPX,IL1B,IL33,IL6,ITIH4,KNG1,NFKB2,PON1,SAA1,TNF
IL-10 Signaling	8.96		ARG2,CCR5,CD14,FCGR2A,FCGR2B,IL1B,IL33,IL6,MAPK13,NFKB2,NFKBIE,TNF
Acute Phase Response Signaling	8.47	3.051	AHSG,C3,CFB,CP,FGG,HPX,IL1B,IL33,IL6,ITIH4,MAPK13,NFKB2,NFKBIE,SAA1,SERPINA3,SERPIND1,TNF
Granulocyte Adhesion and Diapedesis	8.43		CCL17,Ccl2,CCL3L3,CCL4,Ccl7,Ccl8,Ccl9,CXCL10,CXCL12,Cxcl3,CXCL6,IL1B,IL33,MMP12,MMP3,TNF
Communication between Innate and Adaptive Immune Cells	6.84		CCL3L3,CCL4,Ccl9,CSF2,CXCL10,IL1B,IL33,IL6,TNF,TNFSF13B
Role of Hypercytokinemia/hyperchemokinemia in the Pathogenesis of Influenza	6.63	2.236	CCL4,CCR5,CXCL10,IL1B,IL33,IL6,TNF
Dendritic Cell Maturation	5.74	2.887	CD1D,COL10A1,CSF2,FCGR2A,FCGR2B,IL1B,IL33,IL6,MAPK13,NFKB2,NFKBIE,RELB,TNF
Role of IL-17F in Allergic Inflammatory Airway Diseases	5.62	2.449	CCL4,CSF2,CXCL10,CXCL6,IL1B,IL6,NFKB2
Xenobiotic Metabolism AHR Signaling Pathway	5.6	0.333	ALDH1A3,ALDH6A1,GSTA5,GSTM5,IL1B,IL6,NFKB2,PON1,TNF
Differential Regulation of Cytokine Production in Macrophages and T Helper Cells by IL-17A and IL-17F	5.47		CCL4,CSF2,IL1B,IL6,TNF
Role of Pattern Recognition Receptors in Recognition of Bacteria and Viruses	5.35	2.449	C3,CLEC7A,CSF2,IL1B,IL33,IL6,IRF7,NFKB2,OAS1,TNF,TNFSF13B,Tnfsf9
Differential Regulation of Cytokine Production in Intestinal Epithelial Cells by IL-17A and IL-17F	5.16		CCL4,CSF2,IL1B,LCN2,TNF
Systemic Lupus Erythematosus In B Cell Signaling Pathway	4.8	2.324	CSF2,FCGR2A,FCGR2B,IFIT3,IL1B,IL33,IL6,IRF7,ISG15,LILRB4,MALT1,NFKB2,TNF,TNFSF13B,Tnfsf9
Activation of IRF by Cytosolic Pattern Recognition Receptors	4.66	1.134	IL6,IRF7,ISG15,NFKB2,NFKBIE,TNF,ZBP1
FXR/RXR Activation	4.64		AHSG,C3,HPX,IL1B,IL33,ITIH4,KNG1,PON1,SAA1,TNF
Hepatic Cholestasis	4.42		CD14,CSF2,CYP7B1,IL1B,IL33,IL6,NFKB2,NFKBIE,SLCO1A2,TNF,TNFSF13B,Tnfsf9
LPS/IL-1 Mediated Inhibition of RXR Function	4.38	1.342	ABCA1,ALDH1A3,ALDH6A1,CD14,CHST3,FABP1,GSTA5,GSTM5,IL1B,IL33,IL4I1,SLCO1A2,TNF
Altered T Cell and B Cell Signaling in Rheumatoid Arthritis	4.31		CSF2,IL1B,IL33,IL6,NFKB2,RELB,TNF,TNFSF13B
Role of Tissue Factor in Cancer	3.94		CSF2,EGR1,F10,F7,FGG,HBEGF,IL1B,MAPK13,PDIA6
Atherosclerosis Signaling	3.91		COL10A1,CXCL12,IL1B,IL33,IL6,MMP3,NFKB2,PON1,TNF
TREM1 Signaling	3.8	2.646	CSF2,FCGR2B,IL1B,IL6,ITGAX,NFKB2,TNF
IL-17A Signaling in Fibroblasts	3.74		IL6,LCN2,MAPK13,NFKB2,NFKBIE
IL-6 Signaling	3.63	2.828	CD14,IL1B,IL33,IL6,MAPK13,NFKB2,NFKBIE,TNF,TNFAIP6
HMGB1 Signaling	3.59	2.646	CSF2,IL1B,IL33,IL6,MAPK13,NFKB2,RHOF,TNF,TNFSF13B,Tnfsf9
Coagulation System	3.55	0.447	F10,F7,FGG,KNG1,SERPIND1
Role of Cytokines in Mediating Communication between Immune Cells	3.49		CSF2,IL1B,IL33,IL6,TNF
Airway Pathology in Chronic Obstructive Pulmonary Disease	3.46		CSF2,IL1B,IL33,IL6,LCN2,TNF,TNFSF13B,Tnfsf9
Erythropoietin Signaling	3.39	-1.897	CSF2,CSF2RB,IL1B,IL33,IL6,NFKB2,NFKBIE,TNF,TNFSF13B,Tnfsf9
IL-17A Signaling in Airway Cells	3.3	1.342	CXCL6,IL6,MAPK13,MUC5B,NFKB2,NFKBIE
Role of Osteoblasts, Osteoclasts and Chondrocytes in Rheumatoid Arthritis	3.03		ADAMTS4,ALPL,CSF2,CTSK,IL1B,IL33,IL6,MMP3,NFKBIE,SFRP1,TNF
Hepatic Fibrosis / Hepatic Stellate Cell Activation	3.03		ACTA2,CCR5,CD14,COL10A1,IL1B,IL6,MYH7,NFKB2,PDGFRA,TNF
Crosstalk between Dendritic Cells and Natural Killer Cells	2.97	2.236	ACTA2,CSF2,CSF2RB,IL6,NFKB2,TNF
Toll-like Receptor Signaling	2.91	2	CD14,IL1B,IL33,MAPK13,NFKB2,TNF
Xenobiotic Metabolism Signaling	2.88		ALDH1A3,ALDH6A1,CHST3,GCLC,GSTA5,GSTM5,IL1B,IL4I1,IL6,MAPK13,NFKB2,TNF
Antioxidant Action of Vitamin C	2.8	-2.449	CSF2,CSF2RB,MAPK13,NFKB2,NFKBIE,SLC23A3,TNF
Iron homeostasis signaling pathway	2.79		ATP6V0D2,CP,GDF15,HPX,IL6,PDGFRA,SLC39A14,TFRC
Aryl Hydrocarbon Receptor Signaling	2.73	2	ALDH1A3,ALDH6A1,GSTA5,GSTM5,IL1B,IL6,NFKB2,TNF
NF-κB Signaling	2.66	1.667	IL1B,IL33,MALT1,NFKB2,NFKBIE,PDGFRA,RELB,TNF,TNFSF13B
Role of PKR in Interferon Induction and Antiviral Response	2.66	1.134	ATF3,HSPA5,IL1B,MAPK13,NFKB2,NFKBIE,TNF
Tumor Microenvironment Pathway	2.62	3	ARG1,CSF2,CXCL12,IL1B,IL6,MMP12,MMP3,NFKB2,TNF
PPAR Signaling	2.14	-1.633	IL1B,IL33,NFKB2,NFKBIE,PDGFRA,TNF
Systemic Lupus Erythematosus Signaling	2.13		FCGR2A,FCGR2B,IL1B,IL33,IL6,KNG1,TNF,TNFSF13B
Osteoarthritis Pathway	2.11	3	ADAMTS4,ALPL,COL10A1,ELF3,IL1B,MMP12,MMP3,NFKB2,TNF
IL-17 Signaling	2.09		CXCL10,IL6,MAPK13,MMP3,MUC5B
Phagosome Maturation	2.02		ATP6V0D2,CALR,CTSC,CTSF,CTSK,TUBA1C,TUBB6
Production of Nitric Oxide and Reactive Oxygen Species in Macrophages	2.01	0.707	ARG2,MAPK13,NFKB2,NFKBIE,PON1,PPP1R14D,RHOF,TNF
Role of Macrophages, Fibroblasts and Endothelial Cells in Rheumatoid Arthritis	1.91		ADAMTS4,CSF2,CXCL12,IL1B,IL33,IL6,MMP3,NFKBIE,SFRP1,TNF,TNFSF13B
Death Receptor Signaling	1.76	1.342	ACTA2,LMNA,NFKB2,NFKBIE,TNF
Neuroinflammation Signaling Pathway	1.74	3	CXCL10,CXCL12,GJB1,IL1B,IL6,IRF7,MAPK13,MMP3,NFKB2,TNF
Xenobiotic Metabolism PXR Signaling Pathway	1.71	-0.378	ALDH1A3,ALDH6A1,CHST3,GSTA5,GSTM5,IL4I1,PPP1R14D
Coronavirus Pathogenesis Pathway	1.61	1.633	IL1B,IL6,IRF7,MAPK13,NFKB2,NFKBIE
Type I Diabetes Mellitus Signaling	1.59	2.236	IL1B,MAPK13,NFKB2,NFKBIE,TNF
Glucocorticoid Receptor Signaling	1.59		ARG2,CSF2,CSF2RB,CXCR1,FGG,HSPA5,IL1B,IL6,MAPK13,MMP3,NFKBIE,SLPI,TNF
B Cell Receptor Signaling	1.58	2.236	EGR1,FCGR2A,FCGR2B,MALT1,MAPK13,NFKB2,NFKBIE
PI3K Signaling in B Lymphocytes	1.57	1.633	ATF3,C3,FCGR2B,MALT1,NFKB2,NFKBIE
Regulation Of The Epithelial Mesenchymal Transition By Growth Factors Pathway	1.49	1.89	EGR1,IL6,MAPK13,NFKB2,PDGFRA,TNF,TNFSF13B
Hepatic Fibrosis Signaling Pathway	1.39	2.111	ACTA2,COL10A1,IL1B,IL33,MAPK13,NFKB2,NFKBIE,PDGFRA,RHOF,TFRC,TNF
Adrenomedullin signaling pathway	1.36	1.89	C3,IL1B,IL33,MAPK13,MATK,NFKB2,TNF
IL-15 Production	1.35	0.447	FLT3LG,IL6,MATK,NFKB2,PDGFRA
Phagosome Formation	1.35		CLEC7A,FCGR2A,FCGR2B,ITGAX,RHOF
