# Supplementary material for: Single-Walled vs. Multi-Walled Carbon Nanotubes: Influence of Physico-Chemical Properties on Toxicogenomics Responses in Mouse Lungs
Source: Nanomaterials (Basel). 2023 Mar 15;13(6):1059. doi: 10.3390/nano13061059 (PMC10057402; doi:10.3390/nano13061059)
Supplement: Supplementary file 1 [file nanomaterials-13-01059-s001.zip › Table S8.xlsx]

## Sheet: a-c. NRCWE-051
Table S8. Perturbed IPA canonical pathways for NRCWE-051, NRCWE-052, NRCWE-053, and NRCWE-054 after 1 day of exposure.
Table S8a. Perturbed IPA canonical pathways for NRCWE-051 at 6 µg/mouse. Pathways were considered significantly perturbed if the −log (p-value) was ≥ 1.3 .					Table S8b. Perturbed IPA canonical pathways for NRCWE-051 at 18 µg/mouse. Pathways were considered significantly perturbed if the −log (p-value) was ≥ 1.3 .					Table S8c. Perturbed IPA canonical pathways for NRCWE-051 at 54 µg/mouse. Pathways were considered significantly perturbed if the −log (p-value) was ≥ 1.3 .
Ingenuity Canonical Pathways	−log(p-value)	z-score	Molecules		Ingenuity Canonical Pathways	−log(p-value)	z-score	Molecules		Ingenuity Canonical Pathways	−log(p-value)	z-score	Molecules
Agranulocyte Adhesion and Diapedesis	12.5		ACTA2,CCL17,Ccl2,CCL3L3,CCL4,Ccl7,Ccl8,Ccl9,CLDN8,CXCL10,CXCL12,Cxcl3,CXCL6,CXCR1,CXCR2,FN1,IL1B,IL33,MMP12,MMP3,MYH7,SELP,TNF		Agranulocyte Adhesion and Diapedesis	8.98		ACTA2,CCL17,Ccl2,CCL4,Ccl7,Ccl8,Ccl9,CXCL10,CXCL12,Cxcl3,CXCL6,CXCR1,CXCR2,FN1,IL1B,IL33,ITGA1,MMP12,MMP3,MYH7,Ppbp,SELP		Granulocyte Adhesion and Diapedesis	8.43		CCL17,Ccl2,CCL3L3,CCL4,Ccl7,Ccl8,Ccl9,CLDN8,CXCL10,CXCL12,Cxcl3,CXCL6,CXCR2,FPR1,FPR2,IL1B,IL1RL1,IL33,MMP12,MMP15,MMP3,NGFR,Ppbp,SELP
Granulocyte Adhesion and Diapedesis	11.6		CCL17,Ccl2,CCL3L3,CCL4,Ccl7,Ccl8,Ccl9,CLDN8,CXCL10,CXCL12,Cxcl3,CXCL6,CXCR2,FPR1,FPR2,IL1B,IL33,MMP12,MMP3,SELP,TNF		Granulocyte Adhesion and Diapedesis	7.61		CCL17,Ccl2,CCL4,Ccl7,Ccl8,Ccl9,CXCL10,CXCL12,Cxcl3,CXCL6,CXCR2,FPR1,FPR2,IL1B,IL33,MMP12,MMP3,Ppbp,SELP		LPS/IL-1 Mediated Inhibition of RXR Function	8.03	2.828	ABCA1,ABCG1,ALAS1,ALDH1A1,ALDH1A3,ALDH6A1,CD14,CHST3,CPT1A,FABP1,FMO3,FMO5,GSTA3,GSTA5,GSTM4,GSTM5,HMGCS1,HMGCS2,HS3ST6,IL1B,IL1RL1,IL33,IL4I1,MAOB,MGST1,MYD88,NGFR,SLC27A3
Role of Hypercytokinemia/hyperchemokinemia in the Pathogenesis of Influenza	7.07	3.317	CCL4,CXCL10,IL1B,IL33,IL6,IRF7,ISG15,NFKB2,OAS1,RSAD2,TNF		Acute Phase Response Signaling	7.41	3	C3,CEBPB,CFB,CP,FN1,IL1B,IL33,IL6,ITIH4,MAPK13,NFKB2,NFKBIA,OSMR,SAA1,SAA2-SAA4,SERPINA3,SERPIND1,SERPINE1,SOCS1,SOCS3		Agranulocyte Adhesion and Diapedesis	7.42		CCL17,Ccl2,CCL3L3,CCL4,Ccl7,Ccl8,Ccl9,CLDN8,CXCL10,CXCL12,Cxcl3,CXCL6,CXCR1,CXCR2,FN1,IL1B,IL33,MMP12,MMP15,MMP3,MYH10,MYH7,Ppbp,SELP
Communication between Innate and Adaptive Immune Cells	7.07		CCL3L3,CCL4,Ccl9,CD79B,CSF2,CXCL10,IL1B,IL33,IL6,TNF,TNFSF13B		IL-10 Signaling	6.58		ARG2,CCR5,CD14,FCGR2A,FCGR2B,IL1B,IL33,IL6,MAPK13,NFKB2,NFKBIA,SOCS3		IL-10 Signaling	7.38		ARG2,CCR5,CD14,FCGR2A,FCGR2B,IL1B,IL1RL1,IL33,IL6,MAP2K6,MAPK11,NFKB2,NFKBIA,NFKBIE,SOCS3
IL-10 Signaling	7		ARG2,CCR5,CD14,FCGR2A,FCGR2B,IL1B,IL33,IL6,MAP2K6,NFKB2,TNF		LXR/RXR Activation	6.55	-0.277	ABCG1,APOD,ARG2,C3,CD14,IL1B,IL33,IL6,ITIH4,MYLIP,NFKB2,PON1,PTGS2,SAA1,SCD		LXR/RXR Activation	7.35	-1.213	ABCA1,ABCG1,APOA2,ARG2,C3,CD14,IL1B,IL1RL1,IL33,IL6,ITIH4,MSR1,NFKB2,NGFR,NOS2,PON1,S100A8,SAA1,SCD
LXR/RXR Activation	6.52	-0.277	ABCA1,ABCG1,ARG2,C3,CD14,IL1B,IL33,IL6,ITIH4,NFKB2,PON1,SAA1,TNF		Xenobiotic Metabolism AHR Signaling Pathway	5.5	-0.302	AHR,ALDH1A3,ALDH6A1,GSTA3,GSTA5,GSTM5,HDAC5,IL1B,IL6,NFKB2,PON1		Superpathway of Cholesterol Biosynthesis	7.2	2.333	ACAA2,FDPS,HMGCS1,HMGCS2,HSD17B7,IDI1,LSS,MVD,SC5D,SQLE
Role of IL-17F in Allergic Inflammatory Airway Diseases	6.11	2.646	CCL4,CREB5,CSF2,CXCL10,CXCL6,IL1B,IL6,NFKB2		IL-17A Signaling in Fibroblasts	4.57		CEBPB,CEBPD,IL6,LCN2,MAPK13,NFKB2,NFKBIA		Acute Phase Response Signaling	6.7	2.357	APOA2,C3,CEBPB,CFB,FN1,IL1B,IL33,IL6,ITIH4,MAP2K6,MAPK11,MYD88,NFKB2,NFKBIA,NFKBIE,NGFR,OSMR,SAA1,SERPINA3,SERPIND1,SERPINE1,SOCS1,SOCS3
Acute Phase Response Signaling	5.07	2.111	C3,CFB,FN1,IL1B,IL33,IL6,ITIH4,MAP2K6,NFKB2,SAA1,SERPINA3,SERPIND1,SOCS1,TNF		Systemic Lupus Erythematosus In B Cell Signaling Pathway	4.34	0.688	CARD11,CD19,CD79B,CSF2,FCGR2A,FCGR2B,IL1B,IL33,IL6,INPP5K,ISG15,LILRB4,MALT1,NFKB2,STING1,TNFSF10,TNFSF13B,Tnfsf9,TRAF1		Xenobiotic Metabolism AHR Signaling Pathway	6.28	-1.069	ALDH1A1,ALDH1A3,ALDH6A1,GSTA3,GSTA5,GSTM4,GSTM5,HDAC5,IL1B,IL6,MGST1,NFKB2,PON1,UGT1A6
Differential Regulation of Cytokine Production in Macrophages and T Helper Cells by IL-17A and IL-17F	5.06	2.236	CCL4,CSF2,IL1B,IL6,TNF		Role of IL-17F in Allergic Inflammatory Airway Diseases	4.15	2.449	CCL4,CSF2,CXCL10,CXCL6,IL1B,IL6,NFKB2		Role of Macrophages, Fibroblasts and Endothelial Cells in Rheumatoid Arthritis	5.55		ADAMTS4,ATF4,CEBPB,CEBPD,CEBPE,CREB5,CXCL12,FN1,IL1B,IL1RL1,IL33,IL6,MAP2K6,MMP3,MYC,MYD88,NFKBIA,NFKBIE,NGFR,NOS2,PLCH2,PRKCZ,SFRP1,SOCS1,SOCS3,TNFSF13B,TRAF1,WIF1,WNT1,WNT10B
Systemic Lupus Erythematosus In B Cell Signaling Pathway	5	1.698	CARD11,CD79B,CSF2,FCGR2A,FCGR2B,IL1B,IL33,IL6,INPP5K,IRF7,ISG15,LILRB4,MALT1,NFKB2,STING1,TNF,TNFSF13B		Role of Hypercytokinemia/hyperchemokinemia in the Pathogenesis of Influenza	4.1	3	AREG,CCL4,CXCL10,IL1B,IL33,IL6,ISG15,NFKB2,RSAD2		Xenobiotic Metabolism Signaling	5.44		ALDH1A1,ALDH1A3,ALDH6A1,Ces1e,Ces1g,CHST3,FMO3,FMO5,GCLC,GSTA3,GSTA5,GSTM4,GSTM5,HDAC5,HS3ST6,IL1B,IL4I1,IL6,MAOB,MAP2K6,MAP3K6,MAPK11,MGST1,NFKB2,NOS2,PRKCZ,UGT1A6
Differential Regulation of Cytokine Production in Intestinal Epithelial Cells by IL-17A and IL-17F	4.76	2.236	CCL4,CSF2,IL1B,LCN2,TNF		Communication between Innate and Adaptive Immune Cells	4.1		CCL4,Ccl9,CD79B,CSF2,CXCL10,IL1B,IL33,IL6,TNFSF13B		Coagulation System	5.19	1	F10,F13A1,F3,F7,PLAUR,PROC,SERPIND1,SERPINE1,THBD
Altered T Cell and B Cell Signaling in Rheumatoid Arthritis	4.54		CD79B,CSF2,HLA-DOA,IL1B,IL33,IL6,NFKB2,TNF,TNFSF13B		IL-17 Signaling	4.04	3.207	CCL17,CEBPB,Chil3/Chil4,CSF2,IL1B,IL33,IL6,LCN2,MAPK13,MMP3,PTGS2,TNFSF10,TNFSF13B,Tnfsf9		Atherosclerosis Signaling	5.01		ALOXE3,APOA2,CCR2,CXCL12,F3,IL1B,IL33,IL6,MMP3,MSR1,NFKB2,PON1,S100A8,SELP,TNFRSF12A,TNFSF14
IL-17 Signaling	4.15	2.887	CCL17,Chil3/Chil4,CSF2,IL1B,IL33,IL6,LCN2,MAP2K6,MMP3,MUC5AC,TNF,TNFSF13B		Unfolded protein response	3.9	2.646	CALR,CEBPB,CEBPD,CEBPE,HSPA5,HSPA8,HSPH1,PDIA6		Extrinsic Prothrombin Activation Pathway	4.66	1.342	F10,F13A1,F3,F7,PROC,THBD
Activation of IRF by Cytosolic Pattern Recognition Receptors	4.14	1.134	DHX58,IL6,IRF7,ISG15,NFKB2,TNF,ZBP1		LPS/IL-1 Mediated Inhibition of RXR Function	3.77		ABCG1,ALDH1A3,ALDH6A1,CD14,CHST3,FABP1,FABP5,FMO3,FMO5,GSTA3,GSTA5,GSTM5,HMGCS2,IL1B,IL33,IL4I1		Xenobiotic Metabolism PXR Signaling Pathway	4.66	-2.065	ALDH1A1,ALDH1A3,ALDH6A1,Ces1e,Ces1g,CHST3,GSTA3,GSTA5,GSTM4,GSTM5,HS3ST6,IL4I1,MAOB,MGST1,NOS2,PPP1R14B,PRKAR2B,PRKCZ,UGT1A6
LPS/IL-1 Mediated Inhibition of RXR Function	4.13	2.236	ABCA1,ABCG1,ALDH1A3,CD14,CHST3,FABP1,FMO5,GSTA5,GSTM5,HMGCS2,IL1B,IL33,IL4I1,TNF		Xenobiotic Metabolism Signaling	3.56		AHR,ALDH1A3,ALDH6A1,Ces1e,CHST3,FMO3,FMO5,GCLC,GSTA3,GSTA5,GSTM5,HDAC5,IL1B,IL4I1,IL6,MAP3K6,MAPK13,NFKB2		Superpathway of Geranylgeranyldiphosphate Biosynthesis I (via Mevalonate)	4.49	1.342	ACAA2,FDPS,HMGCS1,HMGCS2,IDI1,MVD
Xenobiotic Metabolism AHR Signaling Pathway	4.07	0.707	ALDH1A3,GSTA5,GSTM5,IL1B,IL6,NFKB2,PON1,TNF		Altered T Cell and B Cell Signaling in Rheumatoid Arthritis	3.53		CD79B,CSF2,HLA-DOA,IL1B,IL33,IL6,NFKB2,RELB,TNFSF13B		IL-17A Signaling in Fibroblasts	4.47		CEBPB,CEBPD,IL6,LCN2,MAPK11,NFKB2,NFKBIA,NFKBIE
Atherosclerosis Signaling	3.98		ALOX5,CXCL12,IL1B,IL33,IL6,MMP3,NFKB2,PON1,SELP,TNF		Eicosanoid Signaling	3.53		FPR2,LTB4R,LTC4S,PLA2G4C,PTGES,PTGIR,PTGS1,PTGS2		Mevalonate Pathway I	4.02	1	ACAA2,HMGCS1,HMGCS2,IDI1,MVD
Unfolded protein response	3.92	2.449	CALR,CEBPD,CEBPE,HSPA5,HSPA8,HSPH1,PDIA6		cAMP-mediated signaling	3.39	0.5	ADCY5,ADORA3,ADRB3,APLNR,Cngb1,CXCR2,FPR1,FPR2,HCAR2,HTR7,LTB4R,PDE4B,PDE8B,PTGIR,RGS2,SMPDL3A		Role of IL-17F in Allergic Inflammatory Airway Diseases	4	2.646	ATF4,CCL4,CREB5,CXCL10,CXCL6,IL1B,IL6,NFKB2
Role of Macrophages, Fibroblasts and Endothelial Cells in Rheumatoid Arthritis	3.88		ADAMTS4,CEBPD,CEBPE,CREB5,CSF2,CXCL12,FN1,IL1B,IL33,IL6,MAP2K6,MMP3,PDIA3,SOCS1,TNF,TNFSF13B,WNT10B		Role of JAK family kinases in IL-6-type Cytokine Signaling	3.27		IL6,MAPK13,OSMR,SOCS1,SOCS3		Toll-like Receptor Signaling	3.98	1.414	CD14,IL1B,IL1RL1,IL33,MAP2K6,MAPK11,MYD88,NFKB2,NFKBIA,TNFAIP3,TRAF1
Role of Pattern Recognition Receptors in Recognition of Bacteria and Viruses	3.86	2.646	C1QB,C3,CSF2,IL1B,IL33,IL6,IRF7,NFKB2,OAS1,TNF,TNFSF13B		IL-6 Signaling	3.21	1.897	CD14,CEBPB,IL1B,IL33,IL6,MAPK13,NFKB2,NFKBIA,SOCS1,SOCS3,TNFAIP6		IL-6 Signaling	3.96	1.941	CD14,CEBPB,IL1B,IL1RL1,IL33,IL6,MAP2K6,MAPK11,NFKB2,NFKBIA,NFKBIE,NGFR,SOCS1,SOCS3,TNFAIP6
Eicosanoid Signaling	3.59		ALOX5,DPEP2,FPR2,LTC4S,PTGES,PTGIR,PTGS1		Role of Macrophages, Fibroblasts and Endothelial Cells in Rheumatoid Arthritis	3.2		ADAMTS4,CEBPB,CEBPD,CEBPE,CSF2,CXCL12,FN1,IL1B,IL33,IL6,MMP3,NFKBIA,PDIA3,SFRP1,SOCS1,SOCS3,TNFSF13B,TRAF1,WNT10B		Type I Diabetes Mellitus Signaling	3.84	1.265	CD86,CYCS,IL1B,MAP2K6,MAPK11,MYD88,NFKB2,NFKBIA,NFKBIE,NGFR,NOS2,SOCS1,SOCS3
Dendritic Cell Maturation	3.54	2.53	CREB5,CSF2,FCGR2A,FCGR2B,HLA-DOA,IL1B,IL33,IL6,NFKB2,PDIA3,TNF		Role of MAPK Signaling in Inhibiting the Pathogenesis of Influenza	3.17	2.121	CXCL10,IL1B,IL6,MAPK13,NFKB2,NFKBIA,PLA2G4C,PTGS2		Unfolded protein response	3.54	1.667	ATF4,CALR,CEBPB,CEBPD,CEBPE,HSPA2,HSPA5,PDIA2,PDIA6
Graft-versus-Host Disease Signaling	3.18		HLA-DOA,IL1B,IL33,IL6,TNF		Small Cell Lung Cancer Signaling	3.13	0.447	CCNE1,CDKN2B,CKS1B,CYCS,NFKB2,NFKBIA,PTGS2,TRAF1		iNOS Signaling	3.53	2.646	CD14,JAK3,MAPK11,MYD88,NFKB2,NFKBIA,NFKBIE,NOS2
Role of Cytokines in Mediating Communication between Immune Cells	3.12		CSF2,IL1B,IL33,IL6,TNF		Superpathway of Cholesterol Biosynthesis	3.04	1.342	FDPS,HMGCS2,LSS,SQLE,TM7SF2		Glutathione-mediated Detoxification	3.45	-2.449	GSTA3,Gsta4,GSTA5,GSTM4,GSTM5,MGST1
Coronavirus Replication Pathway	3.06	1.342	Ifitm1,Ifitm6,TUBA1C,TUBB2A,TUBB6		Dendritic Cell Maturation	2.97	2.714	CSF2,FCGR2A,FCGR2B,HLA-DOA,IL1B,IL33,IL6,MAPK13,NFKB2,NFKBIA,PDIA3,RELB		Dendritic Cell Maturation	3.44	3.207	ATF4,CD86,CREB5,FCGR2A,FCGR2B,IL1B,IL33,IL6,MAPK11,MYD88,NFKB2,NFKBIA,NFKBIE,NGFR,PLCH2,RELB
IL-6 Signaling	3.03	1.414	CD14,IL1B,IL33,IL6,MAP2K6,NFKB2,SOCS1,TNF,TNFAIP6		Atherosclerosis Signaling	2.94		APOD,CXCL12,IL1B,IL33,IL6,MMP3,NFKB2,PLA2G4C,PON1,SELP		TWEAK Signaling	3.41	0.378	BIRC3,CYCS,NFKB2,NFKBIA,NFKBIE,TNFRSF12A,TRAF1
Breast Cancer Regulation by Stathmin1	2.97	0.209	ACKR1,ACKR4,ADORA3,ADRB3,CCR5,CREB5,CX3CR1,CXCR1,FFAR2,FPR1,FPR2,GPR34,GPR84,HCAR2,HTR7,LPAR3,NFKB2,PTAFR,PTGIR,SPDEF,TUBA1C,TUBB2A,TUBB6		Aryl Hydrocarbon Receptor Signaling	2.93	0.816	AHR,ALDH1A3,ALDH6A1,CCNE1,CDKN1A,GSTA3,GSTA5,GSTM5,IL1B,IL6,NFKB2		Hepatic Cholestasis	3.27		ADCY5,CD14,CYP7B1,IL1B,IL1RL1,IL33,IL6,MYD88,NFKB2,NFKBIA,NFKBIE,NGFR,PRKAR2B,PRKCZ,TNFSF13B,TNFSF14,Tnfsf9
BAG2 Signaling Pathway	2.91	0.447	CDKN1A,CHRNA7,HSPA5,HSPA8,NFKB2		G-Protein Coupled Receptor Signaling	2.86		ADCY5,ADORA3,ADRB3,APLNR,CXCR2,FPR1,FPR2,HCAR2,HTR7,LTB4R,NFKB2,NFKBIA,PDE4B,PDE8B,PTGIR,RGS2,SMPDL3A		Xenobiotic Metabolism CAR Signaling Pathway	3.22	-2	ALDH1A1,ALDH1A3,ALDH6A1,CHST3,FMO3,FMO5,GSTA3,GSTA5,GSTM4,GSTM5,HS3ST6,MAP2K6,MGST1,NOS2,PRKCZ,UGT1A6
Xenobiotic Metabolism Signaling	2.64		ALDH1A3,CHST3,FMO5,GCLC,GSTA5,GSTM5,IL1B,IL4I1,IL6,MAP2K6,MAP3K6,NFKB2,TNF		4-1BB Signaling in T Lymphocytes	2.83	1	MAPK13,NFKB2,NFKBIA,TNFRSF9,TRAF1		Production of Nitric Oxide and Reactive Oxygen Species in Macrophages	3.21	1.291	APOA2,ARG2,JAK3,MAP3K6,MAPK11,NFKB2,NFKBIA,NFKBIE,NGFR,NOS2,PON1,PPP1R14B,PRKCZ,RAC3,RHOF,RHOU,S100A8
Tumor Microenvironment Pathway	2.59	3.162	ARG1,CSF2,CXCL12,FN1,IL1B,IL6,MMP12,MMP3,NFKB2,TNF		PI3K/AKT Signaling	2.82	1.633	CDKN1A,CSF2RB,CXCR1,CXCR2,GDF15,IL17RD,IL2RA,INPP5K,ITGA1,JAK3,NFKB2,NFKBIA,PTGS2		Th17 Activation Pathway	3.09	2.333	BATF,IL1B,IL6,IRF4,JAK3,MYD88,NFKB2,PTGER4,SOCS3
TREM1 Signaling	2.56	2.449	CSF2,FCGR2B,IL1B,IL6,NFKB2,TNF		Th17 Activation Pathway	2.77	1.89	AHR,CSF2,IL1B,IL6,JAK3,NFKB2,SOCS3		CD40 Signaling	3.09	-1.134	JAK3,MAP2K6,MAPK11,NFKB2,NFKBIA,NFKBIE,PTGS1,TNFAIP3,TRAF1
Crosstalk between Dendritic Cells and Natural Killer Cells	2.56	2.236	ACTA2,CD209,CSF2,IL6,NFKB2,TNF		CD40 Signaling	2.77	0.447	JAK3,MAPK13,NFKB2,NFKBIA,PTGS1,PTGS2,TRAF1		Nicotine Degradation II	3.08	-2.828	AOX1,Aox3,CYP2F1,CYP2S1,CYP4F8,FMO3,FMO5,UGT1A6
Hepatic Cholestasis	2.53		ADCY5,CD14,CSF2,CYP7B1,IL1B,IL33,IL6,NFKB2,TNF,TNFSF13B		Breast Cancer Regulation by Stathmin1	2.77	0.378	ACKR4,ADORA3,ADRB3,APLNR,C5AR2,CCR5,CX3CR1,CXCR1,E2F8,EDNRB,FFAR2,FPR1,FPR2,GPR34,GPR84,HCAR2,HTR7,LTB4R,NFKB2,P2RY2,PPP1R14B,PPP1R14D,PTAFR,PTGIR,TUBA1C,TUBB2A,TUBB2B,TUBB6		STAT3 Pathway	3.02	0	CISH,CSF2RB,CXCR1,CXCR2,IL13RA2,IL1B,IL1RL1,IL2RA,MAPK11,MYC,NGFR,PTPN2,SOCS1,SOCS3
Role of MAPK Signaling in Inhibiting the Pathogenesis of Influenza	2.52	1.633	CXCL10,IL1B,IL6,MAP2K6,NFKB2,TNF		MIF-mediated Glucocorticoid Regulation	2.76	2.236	CD14,NFKB2,NFKBIA,PLA2G4C,PTGS2		TNFR2 Signaling	3	0.447	BIRC3,NFKB2,NFKBIA,NFKBIE,TNFAIP3,TRAF1
Osteoarthritis Pathway	2.5	2.714	ADAMTS4,CREB5,CXCR2,ELF3,FN1,IL1B,ITLN1,MMP12,MMP3,NFKB2,TNF		Cardiac Hypertrophy Signaling (Enhanced)	2.75	1.789	ADCY5,CSF2,CSF2RB,CXCR1,CXCR2,EDNRB,HDAC5,IL17RD,IL1B,IL2RA,IL33,IL6,ITGA1,MAP3K6,MAPK13,NFKB2,PDE4B,PDE8B,PDIA3,PTGS2,SMPDL3A,TNFSF10,TNFSF13B,Tnfsf9,WNT10B		Role of PKR in Interferon Induction and Antiviral Response	2.96	0.905	ATF3,CYCS,HSPA2,HSPA5,IL1B,MAP2K6,MAPK11,MSR1,MYD88,NFKB2,NFKBIA,NFKBIE
Toll-like Receptor Signaling	2.49	1	CD14,IL1B,IL33,MAP2K6,NFKB2,TNF		Airway Pathology in Chronic Obstructive Pulmonary Disease	2.66		APOD,CSF2,IL1B,IL33,IL6,LCN2,TNFSF10,TNFSF13B,Tnfsf9		Role of Hypercytokinemia/hyperchemokinemia in the Pathogenesis of Influenza	2.94	3	AREG,CCL4,CXCL10,IL1B,IL33,IL6,MYD88,NFKB2,RSAD2
Ferroptosis Signaling Pathway	2.45	-0.707	ABCA1,ALOX5,CBS/CBSL,CDKN1A,GCH1,GCLC,SLC39A14,TFRC		Senescence Pathway	2.59	1.807	ATF3,BHLHE40,CDKN1A,CDKN2B,CEBPB,CGAS,E2F8,ELF3,GADD45G,IL6,NFKB2,SAA1,SAA2-SAA4,SERPINE1,STING1,YPEL3		Communication between Innate and Adaptive Immune Cells	2.94		CCL3L3,CCL4,Ccl9,CD86,CXCL10,IL1B,IL33,IL6,TNFSF13B
HMGB1 Signaling	2.4	1.89	CSF2,IL1B,IL33,IL6,MAP2K6,NFKB2,RHOU,TNF,TNFSF13B		Pancreatic Adenocarcinoma Signaling	2.54	2.236	CCNE1,CDKN1A,CDKN2B,E2F8,HBEGF,JAK3,NFKB2,PTGS2,RAD51		4-1BB Signaling in T Lymphocytes	2.92		MAPK11,NFKB2,NFKBIA,NFKBIE,TNFRSF9,TRAF1
Type I Diabetes Mellitus Signaling	2.39	0.816	CYCS,HLA-DOA,IL1B,MAP2K6,NFKB2,SOCS1,TNF		Crosstalk between Dendritic Cells and Natural Killer Cells	2.54	1.633	ACTA2,CD209,CSF2,CSF2RB,IL6,NFKB2,TNFSF10		Nicotine Degradation III	2.85	-2.449	AOX1,Aox3,CYP2F1,CYP2S1,CYP4F8,FMO5,UGT1A6
Airway Pathology in Chronic Obstructive Pulmonary Disease	2.29		CSF2,IL1B,IL33,IL6,LCN2,TNF,TNFSF13B		Hepatic Cholestasis	2.5		ADCY5,CD14,CSF2,CYP7B1,IL1B,IL33,IL6,NFKB2,NFKBIA,TNFSF10,TNFSF13B,Tnfsf9		Pyrimidine Deoxyribonucleotides De Novo Biosynthesis I	2.84	0.447	AK8,DTYMK,NME1,NME2,NME5
Gαs Signaling	2.27	1.134	ADCY5,ADRB3,CREB5,HCAR2,HTR7,PTGIR,RGS2		Glucocorticoid Receptor Signaling	2.5		ARG2,CDKN1A,CSF2,CSF2RB,CXCR1,CXCR2,FKBP5,HSPA5,HSPA8,IL17RD,IL1B,IL2RA,IL6,JAK3,MAPK13,MMP3,NFKBIA,PC,PLA2G4C,PTGS2,SERPINE1,TSC22D3		Tryptophan Degradation X (Mammalian, via Tryptamine)	2.84	0	AKR1B10,ALDH1A1,ALDH1A3,IL4I1,MAOB
cAMP-mediated signaling	2.27	0.905	ADCY5,ADORA3,ADRB3,CREB5,CXCR2,FPR1,FPR2,HCAR2,HTR7,PTGIR,RGS2		Coronavirus Replication Pathway	2.48	1.342	Ifitm1,TUBA1C,TUBB2A,TUBB2B,TUBB6		Role of MAPK Signaling in Inhibiting the Pathogenesis of Influenza	2.76	1	CXCL10,IL1B,IL6,MAP2K6,MAPK11,MYD88,NFKB2,NFKBIA,NFKBIE
Aryl Hydrocarbon Receptor Signaling	2.23	1.342	ALDH1A3,CDKN1A,GSTA5,GSTM5,IL1B,IL6,NFKB2,TNF		HMGB1 Signaling	2.47	2.449	CSF2,IL1B,IL33,IL6,MAPK13,NFKB2,RHOU,SERPINE1,TNFSF10,TNFSF13B,Tnfsf9		Erythropoietin Signaling Pathway	2.72	-2.324	BIRC3,CSF2RB,EPOR,IL1B,IL33,IL6,NFKB2,NFKBIA,NFKBIE,PRKCZ,RAC3,TNFSF13B,TNFSF14,Tnfsf9,WNT1
Role of PKR in Interferon Induction and Antiviral Response	2.2	0.378	CYCS,HSPA5,HSPA8,IL1B,MAP2K6,NFKB2,TNF		Toll-like Receptor Signaling	2.47	2.236	CD14,IL1B,IL33,MAPK13,NFKB2,NFKBIA,TRAF1		Aryl Hydrocarbon Receptor Signaling	2.61	1.342	ALDH1A1,ALDH1A3,ALDH6A1,GSTA3,GSTA5,GSTM4,GSTM5,IL1B,IL6,MGST1,MYC,NFKB2,TP73
B Cell Receptor Signaling	2.06	1.134	CD79B,CREB5,FCGR2A,FCGR2B,INPP5K,MALT1,MAP2K6,MAP3K6,NFKB2		PI3K Signaling in B Lymphocytes	2.37	1.414	ATF3,C3,CD19,CD79B,FCGR2B,MALT1,NFKB2,NFKBIA,PDIA3,PLEKHA4		TNFR1 Signaling	2.57	1.633	BIRC3,CYCS,NFKB2,NFKBIA,NFKBIE,PAK6,TNFAIP3
FXR/RXR Activation	2.06		C3,IL1B,IL33,ITIH4,PON1,SAA1,TNF		STAT3 Pathway	2.37	0.447	CDKN1A,CSF2RB,CXCR1,CXCR2,IL17RD,IL1B,IL2RA,MAPK13,SOCS1,SOCS3		Role of JAK family kinases in IL-6-type Cytokine Signaling	2.57		IL6,MAPK11,OSMR,SOCS1,SOCS3
G-Protein Coupled Receptor Signaling	2.03		ADCY5,ADORA3,ADRB3,CREB5,CXCR2,FPR1,FPR2,HCAR2,HTR7,NFKB2,PTGIR,RGS2		MIF Regulation of Innate Immunity	2.33	2.236	CD14,NFKB2,NFKBIA,PLA2G4C,PTGS2		cAMP-mediated signaling	2.54	2.183	ADCY5,ADORA3,AKAP14,ATF4,CREB5,CXCR2,FPR1,FPR2,HCAR2,HTR7,LTB4R,PDE4B,PDE8B,PRKAR2B,PTGER3,PTGER4,PTGIR,RGS2
Remodeling of Epithelial Adherens Junctions	2.01		ACTA2,NME1,TUBA1C,TUBB2A,TUBB6		BAG2 Signaling Pathway	2.33	0.447	CDKN1A,CHRNA7,HSPA5,HSPA8,NFKB2		HMGB1 Signaling	2.53	1.89	IL1B,IL33,IL6,MAP2K6,MAPK11,NFKB2,NGFR,RAC3,RHOF,RHOU,SERPINE1,TNFSF13B,TNFSF14,Tnfsf9
NRF2-mediated Oxidative Stress Response	1.97		ACTA2,DNAJA1,DNAJB11,EPHX1,FKBP5,GCLC,GSTA5,GSTM5,MAP2K6		B Cell Activating Factor Signaling	2.28	1	MAPK13,NFKB2,NFKBIA,TNFSF13B,TRAF1		Eicosanoid Signaling	2.52		FPR2,LTB4R,LTC4S,PTGER3,PTGER4,PTGES,PTGIR,PTGS1
PPARα/RXRα Activation	1.95	-1.89	ABCA1,ADCY5,BCL3,CHD5,IL1B,IL6,MAP2K6,NFKB2,PDIA3		Erythropoietin Signaling Pathway	2.28	-1.508	CSF2,CSF2RB,EPOR,IL1B,IL33,IL6,NFKB2,NFKBIA,TNFSF10,TNFSF13B,Tnfsf9		IL-17 Signaling	2.5	3.207	CCL17,CEBPB,Chil3/Chil4,IL1B,IL33,IL6,LCN2,MAP2K6,MAPK11,MMP3,NOS2,TNFSF13B,TNFSF14,Tnfsf9
Hepatic Fibrosis / Hepatic Stellate Cell Activation	1.95		ACTA2,CCR5,CD14,FN1,IL1B,IL6,MYH7,NFKB2,TNF		Role of Pattern Recognition Receptors in Recognition of Bacteria and Viruses	2.26	2.236	C1QB,C3,CSF2,IL1B,IL33,IL6,NFKB2,TNFSF10,TNFSF13B,Tnfsf9		Role of IL-17A in Arthritis	2.42		CXCL6,MAP2K6,MAPK11,NFKB2,NFKBIA,NFKBIE,NOS2
Role of Osteoblasts, Osteoclasts and Chondrocytes in Rheumatoid Arthritis	1.94		ADAMTS4,CSF2,CTSK,IL1B,IL33,IL6,MAP2K6,MMP3,TNF,WNT10B		Type I Diabetes Mellitus Signaling	2.21	1.134	CYCS,HLA-DOA,IL1B,MAPK13,NFKB2,NFKBIA,SOCS1,SOCS3		Role of Osteoblasts, Osteoclasts and Chondrocytes in Rheumatoid Arthritis	2.34		ADAMTS4,ALPL,BIRC3,CTSK,IL1B,IL1RL1,IL33,IL6,MAP2K6,MMP3,NFKBIA,NFKBIE,NGFR,SFRP1,WIF1,WNT1,WNT10B
CREB Signaling in Neurons	1.88	0.894	ACKR1,ACKR4,ADCY5,ADORA3,ADRB3,CCR5,CREB5,CX3CR1,CXCR1,FFAR2,FPR1,FPR2,GPR34,GPR84,HCAR2,HTR7,LPAR3,PDIA3,PTAFR,PTGIR		IL-17A Signaling in Airway Cells	2.18	1.633	CXCL6,IL6,JAK3,MAPK13,NFKB2,NFKBIA		BAG2 Signaling Pathway	2.33	-1.633	CHRNA7,HSPA2,HSPA5,MYC,NFKB2,PRKN
MSP-RON Signaling In Macrophages Pathway	1.79	0.816	ARG1,CREB5,HLA-DOA,NFKB2,SOCS1,TNF		JAK/Stat Signaling	2.18	0.378	CDKN1A,CEBPB,IL6,JAK3,NFKB2,SOCS1,SOCS3		NRF2-mediated Oxidative Stress Response	2.3	-0.378	AOX1,ATF4,DNAJB11,DNAJB13,EPHX1,FKBP5,GCLC,GSTA3,GSTA5,GSTM4,GSTM5,MAFF,MAP2K6,MGST1,PRKCZ
Adrenomedullin signaling pathway	1.77	1	ADCY5,C3,IL1B,IL33,MAP2K6,MATK,NFKB2,PDIA3,TNF		Antioxidant Action of Vitamin C	2.16	-2.646	CSF2,CSF2RB,MAPK13,NFKB2,NFKBIA,PDIA3,PLA2G4C,SLC23A3		B Cell Activating Factor Signaling	2.28		MAPK11,NFKB2,NFKBIA,NFKBIE,TNFSF13B,TRAF1
Erythropoietin Signaling Pathway	1.76	-2.121	CSF2,EPOR,IL1B,IL33,IL6,NFKB2,TNF,TNFSF13B		iNOS Signaling	2.15	2.236	CD14,JAK3,MAPK13,NFKB2,NFKBIA		G-Protein Coupled Receptor Signaling	2.26		ADCY5,ADORA3,ATF4,CREB5,CXCR2,FPR1,FPR2,HCAR2,HTR7,LTB4R,NFKB2,NFKBIA,NFKBIE,PDE4B,PDE8B,PRKAR2B,PTGER3,PTGER4,PTGIR,RGS2
Germ Cell-Sertoli Cell Junction Signaling	1.74		ACTA2,MAP2K6,MAP3K6,RHOU,TNF,TUBA1C,TUBB2A,TUBB6		IL-23 Signaling Pathway	2.15	0.447	CSF2,IL1B,NFKB2,NFKBIA,SOCS3		Phagosome Formation	2.22		CLEC7A,FCGR2A,FCGR2B,FN1,MRC1,MSR1,PLCH2,PRKCZ,RAC3,RHOF,RHOU
Th1 Pathway	1.73	-0.447	CCR5,HLA-DOA,IL6,MAP2K6,NFIL3,SOCS1		Th1 Pathway	2.11	0.378	CCR5,DLL1,HLA-DOA,IL6,JAK3,NFIL3,SOCS1,SOCS3		Systemic Lupus Erythematosus In B Cell Signaling Pathway	2.09	1.414	FCGR2A,FCGR2B,IL1B,IL33,IL6,IRF5,LILRB4,MALT1,MYC,MYD88,NFKB2,PRKCZ,RAC3,STING1,TNFSF13B,TNFSF14,Tnfsf9,TRAF1
VDR/RXR Activation	1.67	2	CD14,CDKN1A,CSF2,CXCL10,IGFBP6		Remodeling of Epithelial Adherens Junctions	2.08		ACTA2,NME1,TUBA1C,TUBB2A,TUBB2B,TUBB6		Pyrimidine Ribonucleotides Interconversion	2.09	0.447	AK8,CTPS1,NME1,NME2,NME5
Systemic Lupus Erythematosus Signaling	1.67		CD79B,FCGR2A,FCGR2B,IL1B,IL33,IL6,TNF,TNFSF13B		Th1 and Th2 Activation Pathway	2.07		CCR5,DLL1,HLA-DOA,IL2RA,IL33,IL6,JAK3,NFIL3,SOCS1,SOCS3		Circadian Rhythm Signaling	2.09		ATF4,BHLHE40,CREB5,NR1D1,PER1
NF-κB Signaling	1.66	1.414	CARD11,IL1B,IL33,MALT1,MAP2K6,NFKB2,TNF,TNFSF13B		Production of Nitric Oxide and Reactive Oxygen Species in Macrophages	2.02	0.905	APOD,ARG2,JAK3,MAP3K6,MAPK13,NFKB2,NFKBIA,PON1,PPP1R14B,PPP1R14D,RHOU		Breast Cancer Regulation by Stathmin1	2.08	2.058	ACKR1,ACKR4,ADORA3,ATF4,CCKAR,CCR2,CCR5,CREB5,CXCR1,EDNRB,FFAR2,FPR1,FPR2,GPR176,GPR65,GPR84,GPRC5C,HCAR2,HTR7,LPAR3,LTB4R,NFKB2,P2RY2,PPP1R14B,PRKAR2B,PRKCZ,PTAFR,PTGER3,PTGER4,PTGIR,RAC3,TUBA1C,TUBB2B,TUBB6
Phagosome Maturation	1.61		CALR,CTSC,CTSF,CTSK,TUBA1C,TUBB2A,TUBB6		Role of PKR in Interferon Induction and Antiviral Response	2.02	0.707	ATF3,CYCS,HSPA5,HSPA8,IL1B,MAPK13,NFKB2,NFKBIA		PXR/RXR Activation	2.07		ALAS1,ALDH1A1,CPT1A,HMGCS2,IL6,PRKAR2B,SCD
Neuroinflammation Signaling Pathway	1.59	2.111	CREB5,CX3CR1,CXCL10,CXCL12,HLA-DOA,IL1B,IL6,IRF7,MMP3,NFKB2,TNF		NRF2-mediated Oxidative Stress Response	1.97		ACTA2,DNAJA1,DNAJB1,DNAJB11,EPHX1,FKBP5,GCLC,GSTA3,GSTA5,GSTM5,MAFF		IL-9 Signaling	2.04	0	BCL3,CISH,JAK3,NFKB2,SOCS3
ILK Signaling	1.52	1.414	ACTA2,CREB5,FN1,MAP2K6,MYH7,NFKB2,RHOU,TNF		Osteoarthritis Pathway	1.94	3.317	ADAMTS4,ALPL,CEBPB,CXCR2,ELF3,FN1,IL1B,ITGA1,MMP12,MMP3,NFKB2,PTGS2		Ferroptosis Signaling Pathway	2.03	0.302	ABCA1,ALOXE3,ANGPTL4,ATF4,CBS/CBSL,CTH,GCH1,GCLC,H2BC5,SLC39A14,TFRC
IL-15 Production	1.52	0	BMX,FLT3LG,IL6,MAP2K6,MATK,NFKB2		Coronavirus Pathogenesis Pathway	1.94	1.667	E2F8,IL1B,IL6,MAPK13,NFKB2,NFKBIA,PTGS2,SERPINE1,STING1		Induction of Apoptosis by HIV1	2.03	-0.378	BIRC3,CYCS,NFKB2,NFKBIA,NFKBIE,NGFR,TRAF1
Th1 and Th2 Activation Pathway	1.48		CCR5,HLA-DOA,IL33,IL6,MAP2K6,NFIL3,SOCS1		TREM1 Signaling	1.92	2.449	CSF2,FCGR2B,IL1B,IL6,ITGAX,NFKB2		Superpathway of Melatonin Degradation	2.03	-1.633	CYP2F1,CYP2S1,CYP4F8,IL4I1,MAOB,UGT1A6
Aldosterone Signaling in Epithelial Cells	1.44		DNAJA1,DNAJB11,HSPA5,HSPA8,HSPH1,PDIA3,PIP5K1A		Activation of IRF by Cytosolic Pattern Recognition Receptors	1.88	0.447	IL6,ISG15,NFKB2,NFKBIA,ZBP1		Role of Pattern Recognition Receptors in Recognition of Bacteria and Viruses	2	1.89	C1QB,C3,CLEC7A,IL1B,IL33,IL6,MYD88,NFKB2,PRKCZ,TNFSF13B,TNFSF14,Tnfsf9
Sertoli Cell-Sertoli Cell Junction Signaling	1.41		ACTA2,CLDN8,MAP3K6,MPP6,TNF,TUBA1C,TUBB2A,TUBB6		Role of IL-17A in Arthritis	1.88		CXCL6,MAPK13,NFKB2,NFKBIA,PTGS2		IL-17A Signaling in Airway Cells	1.99	0.816	CXCL6,IL6,JAK3,MAPK11,NFKB2,NFKBIA,NFKBIE
Salvage Pathways of Pyrimidine Ribonucleotides	1.4	1.342	MAP2K6,MAP3K6,NME1,NME2,UCK2		Xenobiotic Metabolism PXR Signaling Pathway	1.85	-0.632	ALDH1A3,ALDH6A1,Ces1e,CHST3,GSTA3,GSTA5,GSTM5,IL4I1,PPP1R14B,PPP1R14D		Pyrimidine Ribonucleotides De Novo Biosynthesis	1.98	0.447	AK8,CTPS1,NME1,NME2,NME5
Gαi Signaling	1.4	0.816	ADCY5,ADORA3,CXCR2,FPR1,FPR2,HCAR2		Lymphotoxin β Receptor Signaling	1.85		CYCS,NFKB2,NFKBIA,RELB,TRAF1		Xenobiotic Metabolism General Signaling Pathway	1.91	-1.508	GCLC,GSTA3,GSTA5,GSTM4,GSTM5,MAP2K6,MAP3K6,MAPK11,MGST1,PRKCZ,UGT1A6
					Phagosome Formation	1.84		FCGR2A,FCGR2B,FN1,ITGA1,ITGAX,MRC1,PDIA3,RHOU		Hepatic Fibrosis / Hepatic Stellate Cell Activation	1.91		CCR5,CD14,COL4A6,COL8A2,EDNRB,FN1,IL1B,IL1RL1,IL6,MYH10,MYH7,NFKB2,NGFR,SERPINE1
					Dopamine Receptor Signaling	1.81		ADCY5,GCH1,IL4I1,PPP1R14B,PPP1R14D,PPP1R1B		Sumoylation Pathway	1.83	-1.633	MYB,NFKB2,NFKBIA,RAC3,RAN,RCC1,RFC4,RHOF,RHOU
					Phagosome Maturation	1.8		ATP6V0D2,CALR,CTSC,CTSF,CTSK,TUBA1C,TUBB2A,TUBB2B,TUBB6		Cardiac Hypertrophy Signaling (Enhanced)	1.81	1.225	ADCY5,ATP2A2,CSF2RB,CXCR1,CXCR2,EDNRB,HDAC5,IL13RA2,IL1B,IL1RL1,IL2RA,IL33,IL6,MAP2K6,MAP3K6,MAPK11,MYC,NFKB2,NGFR,PDE4B,PDE8B,PLCH2,PRKAR2B,PRKCZ,TNFSF13B,TNFSF14,Tnfsf9,WNT1,WNT10B
					Tumor Microenvironment Pathway	1.7	3.162	ARG1,CSF2,CXCL12,FN1,IL1B,IL6,MMP12,MMP3,NFKB2,PTGS2		Th1 and Th2 Activation Pathway	1.8		CCR5,CD86,DLL1,IL1RL1,IL2RA,IL33,IL6,JAK3,MAP2K6,NFIL3,SOCS1,SOCS3
					HIF1α Signaling	1.7	1.897	ADM,CDKN1A,HK3,HSPA5,HSPA8,IL6,LDHA,MMP12,MMP3,RAN,SERPINE1		Osteoarthritis Pathway	1.79	2.673	ADAMTS4,ALPL,ATF4,CASP4,CEBPB,CREB5,CXCR2,FN1,IL1B,IL1RL1,MMP12,MMP3,NFKB2,NOS2,S100A8
					VDR/RXR Activation	1.68	1.342	CD14,CDKN1A,CEBPB,CSF2,CXCL10,IGFBP6		NF-κB Signaling	1.78	0.832	IL1B,IL33,MALT1,MAP2K6,MYD88,NFKB2,NFKBIA,NFKBIE,NGFR,PRKCZ,RELB,TNFAIP3,TNFSF13B
					MSP-RON Signaling In Macrophages Pathway	1.68	1.134	ARG1,HLA-DOA,NFKB2,PTGS2,SBNO2,SOCS1,SOCS3		CD27 Signaling in Lymphocytes	1.78	0	CYCS,MAP2K6,MAP3K6,NFKB2,NFKBIA,NFKBIE
					Gαi Signaling	1.68	0.707	ADCY5,ADORA3,APLNR,CXCR2,FPR1,FPR2,HCAR2,LTB4R		Lymphotoxin β Receptor Signaling	1.78	0	CYCS,NFKB2,NFKBIA,RELB,TNFSF14,TRAF1
					B Cell Receptor Signaling	1.67	1.414	CD19,CD79B,FCGR2A,FCGR2B,INPP5K,MALT1,MAP3K6,MAPK13,NFKB2,NFKBIA		Hepatic Fibrosis Signaling Pathway	1.75	1.043	ATF4,CEBPB,CREB5,IL1B,IL1RL1,IL33,MAP2K6,MAPK11,MYC,MYD88,NFKB2,NFKBIA,NFKBIE,NGFR,PRKAR2B,PRKCZ,RAC3,RHOF,RHOU,SERPINE1,TFRC,WNT1,WNT10B
					Hepatic Fibrosis / Hepatic Stellate Cell Activation	1.56		ACTA2,CCR5,CD14,EDNRB,FN1,IL1B,IL6,MYH7,NFKB2,SERPINE1		MSP-RON Signaling In Macrophages Pathway	1.75	1	ARG1,ATF4,CREB5,NFKB2,NOS2,PRKCZ,SBNO2,SOCS1,SOCS3
					Cell Cycle: G1/S Checkpoint Regulation	1.5	-0.447	CCNE1,CDKN1A,CDKN2B,E2F8,HDAC5		Tumor Microenvironment Pathway	1.74	3.051	ARG1,CXCL12,FN1,IL1B,IL6,MMP12,MMP15,MMP3,MYC,NFKB2,NOS2,PDCD1LG2,TNC
					Role of Osteoblasts, Osteoclasts and Chondrocytes in Rheumatoid Arthritis	1.48		ADAMTS4,ALPL,CSF2,CTSK,IL1B,IL33,IL6,MMP3,NFKBIA,SFRP1,WNT10B		April Mediated Signaling	1.74	-1	MAPK11,NFKB2,NFKBIA,NFKBIE,TRAF1
					Role of Tissue Factor in Cancer	1.45		CSF2,F10,HBEGF,IL1B,MAPK13,PDIA6,PLAUR		Serotonin Receptor Signaling	1.74		ADCY5,GCH1,HTR7,IL4I1,MAOB
					FXR/RXR Activation	1.41		APOD,C3,IL1B,IL33,ITIH4,PON1,SAA1		Colorectal Cancer Metastasis Signaling	1.73	1.5	ADCY5,IL6,JAK3,MMP12,MMP15,MMP3,MYC,NFKB2,NOS2,PRKAR2B,PTGER3,PTGER4,RAC3,RHOF,RHOU,WNT1,WNT10B
					Adrenomedullin signaling pathway	1.39	1.897	ADCY5,ADM,C3,CEBPB,IL1B,IL33,MAPK13,MATK,NFKB2,PDIA3		TREM1 Signaling	1.71	2.646	CD86,FCGR2B,IL1B,IL1RL1,IL6,MYD88,NFKB2
					Th2 Pathway	1.34	1.342	CCR5,DLL1,HLA-DOA,IL2RA,IL33,JAK3,SOCS3		MIF Regulation of Innate Immunity	1.69	2.236	CD14,NFKB2,NFKBIA,NFKBIE,NOS2
					NER Pathway	1.3	2.236	CHAF1A,CHAF1B,LIG1,POLE2,PRIM1,RFC4		Th1 Pathway	1.67	0.707	CCR5,CD86,DLL1,IL6,JAK3,MAP2K6,NFIL3,SOCS1,SOCS3
										Gαs Signaling	1.65	1.667	ADCY5,ATF4,CREB5,HCAR2,HTR7,PRKAR2B,PTGER4,PTGIR,RGS2
										Small Cell Lung Cancer Signaling	1.65		CKS1B,CYCS,MYC,NFKB2,NFKBIA,NFKBIE,TRAF1
										Dopamine Receptor Signaling	1.59		ADCY5,GCH1,IL4I1,MAOB,PPP1R14B,PPP1R1B,PRKAR2B
										ILK Signaling	1.58	1.508	ATF4,CREB5,FN1,MAP2K6,MYC,MYH10,MYH7,NFKB2,NOS2,PPP1R14B,RAC3,RHOF,RHOU
										IL-1 Signaling	1.58	0.816	ADCY5,MAP2K6,MAPK11,MYD88,NFKB2,NFKBIA,NFKBIE,PRKAR2B
										PPARα/RXRα Activation	1.58	-2.53	ABCA1,ADCY5,APOA2,BCL3,IL1B,IL1RL1,IL6,MAP2K6,NFKB2,NFKBIA,NFKBIE,PLCH2,PRKAR2B
										PFKFB4 Signaling Pathway	1.49	0.447	ATF4,CREB5,HK3,MAP2K6,PRKAR2B
										Serotonin Degradation	1.49	-0.447	ALDH1A1,ALDH1A3,IL4I1,MAOB,UGT1A6
										Role of Tissue Factor in Cancer	1.47		F10,F3,F7,HBEGF,IL1B,MAPK11,PDIA2,PDIA6,PLAUR
										VDR/RXR Activation	1.45	1.633	CAMP,CD14,CEBPB,CXCL10,IL1RL1,PRKCZ,THBD
										Altered T Cell and B Cell Signaling in Rheumatoid Arthritis	1.45		CD86,IL1B,IL33,IL6,NFKB2,RELB,TNFSF13B
										IL-12 Signaling and Production in Macrophages	1.42		APOA2,CEBPB,MAPK11,MYD88,NFKB2,NOS2,PON1,PRKCZ,S100A8
										JAK/Stat Signaling	1.4	0.378	CEBPB,CISH,IL6,JAK3,NFKB2,SOCS1,SOCS3
										IL-15 Production	1.4	-0.333	BMX,FLT3LG,IL6,JAK3,MAP2K6,MATK,NFKB2,PRKCZ,TYRO3
										Myc Mediated Apoptosis Signaling	1.39	0.447	CYCS,MYC,NFKB2,NGFR,PRKAR2B
										LPS-stimulated MAPK Signaling	1.38	0.816	CD14,MAP2K6,MAPK11,NFKB2,NFKBIA,NFKBIE,PRKCZ
										PI3K Signaling in B Lymphocytes	1.37	1.265	ATF3,ATF4,C3,FCGR2B,MALT1,NFKB2,NFKBIA,NFKBIE,PLCH2,PRKCZ
										Adrenomedullin signaling pathway	1.37	0.302	ADCY5,ADM,C3,CEBPB,CTH,IL1B,IL33,MAP2K6,MAPK11,MATK,NFKB2,PLCH2,PRKAR2B
										Glucocorticoid Receptor Signaling	1.33		ARG2,CSF2RB,CXCR1,CXCR2,FKBP5,GJA1,HSPA2,HSPA5,IL13RA2,IL1B,IL1RL1,IL2RA,IL6,JAK3,MAPK11,MMP3,MYC,NFKBIA,NFKBIE,NOS2,PC,SCGB1A1,SERPINE1,SLPI
										CREB Signaling in Neurons	1.32	1.616	ACKR1,ACKR4,ADCY5,ADORA3,ATF4,CCKAR,CCR2,CCR5,CREB5,CXCR1,EDNRB,FFAR2,FPR1,FPR2,GPR176,GPR65,GPR84,GPRC5C,HCAR2,HTR7,LPAR3,LTB4R,NGFR,P2RY2,PLCH2,PRKAR2B,PRKCZ,PTAFR,PTGER3,PTGER4,PTGIR
										HIF1α Signaling	1.32	1.155	ADM,HK3,HSPA2,HSPA5,IL6,MAP2K6,MMP12,MMP15,MMP3,NOS2,PRKCZ,RAN,SERPINE1
										Endocannabinoid Cancer Inhibition Pathway	1.32	0.632	ADCY5,ATF3,ATF4,CASP4,CREB5,MAP2K6,MYC,NOS2,PRKAR2B,SMPD3
										Antioxidant Action of Vitamin C	1.32	-1.342	CSF2RB,GLRX,MAPK11,NFKB2,NFKBIA,NFKBIE,PLCH2,SLC23A3
										Neuregulin Signaling	1.3	0	AREG,EREG,ERRFI1,GRB7,HBEGF,MATK,MYC,PRKCZ

## Sheet: d-e. NRCWE-052
Table S8. Perturbed IPA canonical pathways for NRCWE-051, NRCWE-052, NRCWE-053, and NRCWE-054 after 1 day of exposure.
Table S8d. Perturbed IPA canonical pathways for NRCWE-052 at 18 µg/mouse. Pathways were considered significantly perturbed if the −log (p-value) was ≥ 1.3 .					Table S8e. Perturbed IPA canonical pathways for NRCWE-052 at 54 µg/mouse. Pathways were considered significantly perturbed if the −log (p-value) was ≥ 1.3 .
Ingenuity Canonical Pathways	−log(p-value)	z-score	Molecules		Ingenuity Canonical Pathways	−log(p-value)	z-score	Molecules
Glucocorticoid Receptor Signaling	2.06		ARG2,FKBP5,NFKBIA,PTGS2,TSC22D3		Agranulocyte Adhesion and Diapedesis	9.53		ACTA2,CCL17,Ccl2,Ccl7,Ccl8,Ccl9,CXCL10,CXCL12,Cxcl3,CXCL6,CXCR2,FN1,IL1B,IL33,MMP12,MYH7,SELP
					Granulocyte Adhesion and Diapedesis	8.42		CCL17,Ccl2,Ccl7,Ccl8,Ccl9,CXCL10,CXCL12,Cxcl3,CXCL6,CXCR2,IL1B,IL33,MMP12,NGFR,SELP
					LXR/RXR Activation	7.26	-0.302	ABCA1,ARG2,C3,CD14,IL1B,IL33,IL6,ITIH4,MSR1,NGFR,PON1,SAA1
					LPS/IL-1 Mediated Inhibition of RXR Function	5.78	2	ABCA1,ALDH1A3,ALDH6A1,CD14,CHST3,FABP1,FMO3,GSTA3,GSTA5,HMGCS2,IL1B,IL33,IL4I1,NGFR
					Role of Hypercytokinemia/hyperchemokinemia in the Pathogenesis of Influenza	5.31	2.828	AREG,CXCL10,IL1B,IL33,IL6,IRF7,ISG15,OAS1
					IL-10 Signaling	5.26		ARG2,CCR5,CD14,FCGR2A,FCGR2B,IL1B,IL33,IL6
					Role of IL-17F in Allergic Inflammatory Airway Diseases	4.79	2.236	CREB5,CSF2,CXCL10,CXCL6,IL1B,IL6
					Acute Phase Response Signaling	4.48	2.828	C3,CFB,FN1,IL1B,IL33,IL6,ITIH4,NGFR,SAA1,SERPINA3,SERPIND1
					Xenobiotic Metabolism AHR Signaling Pathway	4.16	-0.378	ALDH1A3,ALDH6A1,GSTA3,GSTA5,IL1B,IL6,PON1
					Aryl Hydrocarbon Receptor Signaling	3.85	2.236	ALDH1A3,ALDH6A1,CCNA2,CCNE1,GSTA3,GSTA5,IL1B,IL6,MYC
					Role of Pattern Recognition Receptors in Recognition of Bacteria and Viruses	3.68	2.449	C1QA,C1QB,C3,CSF2,IL1B,IL33,IL6,IRF7,OAS1
					Systemic Lupus Erythematosus In B Cell Signaling Pathway	3.65	0.577	CARD11,CSF2,FCGR2A,FCGR2B,IL1B,IL33,IL6,IRF7,ISG15,LILRB4,MYC,TRAF1
					Communication between Innate and Adaptive Immune Cells	3.41		Ccl9,CSF2,CXCL10,IL1B,IL33,IL6
					Role of Macrophages, Fibroblasts and Endothelial Cells in Rheumatoid Arthritis	3.38		ADAMTS4,CEBPD,CREB5,CSF2,CXCL12,FN1,IL1B,IL33,IL6,MYC,NGFR,TRAF1,WNT10B
					Activation of IRF by Cytosolic Pattern Recognition Receptors	3.07	0.447	DHX58,IL6,IRF7,ISG15,ZBP1
					Cell Cycle Control of Chromosomal Replication	3	2.236	LIG1,MCM2,MCM6,PRIM1,TOP2A
					Hepatic Fibrosis / Hepatic Stellate Cell Activation	2.91		ACTA2,CCR5,CD14,EDN1,FN1,IL1B,IL6,MYH7,NGFR
					Xenobiotic Metabolism Signaling	2.89		ALDH1A3,ALDH6A1,Ces1e,CHST3,FMO3,GSTA3,GSTA5,IL1B,IL4I1,IL6,PPP2R2C
					Atherosclerosis Signaling	2.89		CXCL12,IL1B,IL33,IL6,MSR1,PON1,SELP
					Dendritic Cell Maturation	2.77	2.646	CREB5,CSF2,FCGR2A,FCGR2B,IL1B,IL33,IL6,NGFR
					NER Pathway	2.56	2	CHAF1A,CHAF1B,LIG1,PRIM1,RFC4,TOP2A
					Crosstalk between Dendritic Cells and Natural Killer Cells	2.49	2	ACTA2,CD209,CSF2,CSF2RB,IL6
					Tumor Microenvironment Pathway	2.46	2.828	ARG1,CSF2,CXCL12,FN1,IL1B,IL6,MMP12,MYC
					Role of Osteoblasts, Osteoclasts and Chondrocytes in Rheumatoid Arthritis	2.42		ADAMTS4,ALPL,CSF2,CTSK,IL1B,IL33,IL6,NGFR,WNT10B
					FXR/RXR Activation	2.2		C3,IL1B,IL33,ITIH4,PON1,SAA1
					IL-17 Signaling	2.15	2.646	CCL17,Chil3/Chil4,CSF2,IL1B,IL33,IL6,LCN2
					Ferroptosis Signaling Pathway	2.06	0.816	ABCA1,ANGPTL4,CBS/CBSL,GCH1,SLC39A14,TFRC
					Xenobiotic Metabolism CAR Signaling Pathway	2.06	-1.89	ALDH1A3,ALDH6A1,CHST3,FMO3,GSTA3,GSTA5,PPP2R2C
					Xenobiotic Metabolism PXR Signaling Pathway	2.04	-1.134	ALDH1A3,ALDH6A1,Ces1e,CHST3,GSTA3,GSTA5,IL4I1
					Hepatic Cholestasis	1.88		CD14,CSF2,CYP7B1,IL1B,IL33,IL6,NGFR
					STAT3 Pathway	1.85	2	CSF2RB,CXCR2,IL1B,IL22RA2,MYC,NGFR
					Airway Pathology in Chronic Obstructive Pulmonary Disease	1.77		CSF2,IL1B,IL33,IL6,LCN2
					Gαs Signaling	1.75	1.342	ADRB3,CREB5,HCAR2,PTGIR,RGS2
					Phagosome Formation	1.58		FCGR2A,FCGR2B,FN1,MRC1,MSR1
					Osteoarthritis Pathway	1.53	1.89	ADAMTS4,ALPL,CREB5,CXCR2,FN1,IL1B,MMP12
					IL-6 Signaling	1.47	2	CD14,IL1B,IL33,IL6,NGFR
					cAMP-mediated signaling	1.39	1.89	ADORA3,ADRB3,CREB5,CXCR2,HCAR2,PTGIR,RGS2
					Iron homeostasis signaling pathway	1.39		ATP6V0D2,GDF15,IL6,SLC39A14,TFRC
					ILK Signaling	1.33	1.633	ACTA2,CREB5,FN1,MYC,MYH7,PPP2R2C

## Sheet: f. NRCWE-053
Table S8. Perturbed IPA canonical pathways for NRCWE-051, NRCWE-052, NRCWE-053, and NRCWE-054 after 1 day of exposure.
Table S8f. Perturbed IPA canonical pathways for NRCWE-053 at 54 µg/mouse. Pathways were considered significantly perturbed if the −log (p-value) was ≥ 1.3.
Ingenuity Canonical Pathways	−log(p-value)	z-score	Molecules
Agranulocyte Adhesion and Diapedesis	9.72		ACTA2,CCL17,Ccl2,Ccl7,Ccl8,Ccl9,CLDN8,CXCL10,CXCL12,Cxcl3,CXCL6,CXCR1,IL1B,IL33,MMP3,MYH7
Granulocyte Adhesion and Diapedesis	7.52		CCL17,Ccl2,Ccl7,Ccl8,Ccl9,CLDN8,CXCL10,CXCL12,Cxcl3,CXCL6,IL1B,IL33,MMP3
LXR/RXR Activation	6.09	-1.265	C3,CD14,IL1B,IL33,IL6,ITIH4,NFKB2,PON1,PTGS2,SAA1
Xenobiotic Metabolism AHR Signaling Pathway	5.67	0	ALDH1A1,ALDH1A3,GSTA5,GSTM5,IL1B,IL6,NFKB2,PON1
Aryl Hydrocarbon Receptor Signaling	5.27	2.449	ALDH1A1,ALDH1A3,CCNA2,CCNE1,GSTA5,GSTM5,IL1B,IL6,MCM7,NFKB2
Acute Phase Response Signaling	5.18	2.121	C3,CFB,IL1B,IL33,IL6,ITIH4,NFKB2,SAA1,SERPINA3,SERPIND1,SOCS1
LPS/IL-1 Mediated Inhibition of RXR Function	4.39		ALDH1A1,ALDH1A3,CD14,CHST3,FABP1,FMO3,GSTA5,GSTM5,IL1B,IL33,IL4I1
Cell Cycle Control of Chromosomal Replication	4.36	2.449	LIG1,MCM2,MCM6,MCM7,PRIM1,TOP2A
Xenobiotic Metabolism Signaling	4.14		ALDH1A1,ALDH1A3,Ces1e,CHST3,FMO3,GCLC,GSTA5,GSTM5,IL1B,IL4I1,IL6,NFKB2
Role of IL-17F in Allergic Inflammatory Airway Diseases	4.03	2	CXCL10,CXCL6,IL1B,IL6,NFKB2
IL-17 Signaling	3.96	3	CCL17,Chil3/Chil4,IL1B,IL33,IL6,LCN2,MMP3,PTGS2,TNFSF13B
Role of Hypercytokinemia/hyperchemokinemia in the Pathogenesis of Influenza	3.82	2.449	AREG,CXCL10,IL1B,IL33,IL6,NFKB2
Communication between Innate and Adaptive Immune Cells	3.82		Ccl9,CXCL10,IL1B,IL33,IL6,TNFSF13B
IL-10 Signaling	3.79		CD14,FCGR2B,IL1B,IL33,IL6,NFKB2
Atherosclerosis Signaling	3.33		CXCL12,IL1B,IL33,IL6,MMP3,NFKB2,PON1
Role of Macrophages, Fibroblasts and Endothelial Cells in Rheumatoid Arthritis	2.97		ADAMTS4,CEBPD,CXCL12,IL1B,IL33,IL6,MMP3,SFRP1,SOCS1,TNFSF13B,WNT10B
NER Pathway	2.94	2	CHAF1A,CHAF1B,LIG1,PRIM1,RFC4,TOP2A
Role of Osteoblasts, Osteoclasts and Chondrocytes in Rheumatoid Arthritis	2.94		ADAMTS4,ALPL,CTSK,IL1B,IL33,IL6,MMP3,SFRP1,WNT10B
Role of MAPK Signaling in Inhibiting the Pathogenesis of Influenza	2.79	2.236	CXCL10,IL1B,IL6,NFKB2,PTGS2
Role of Pattern Recognition Receptors in Recognition of Bacteria and Viruses	2.78	2.236	C1QB,C3,IL1B,IL33,IL6,NFKB2,TNFSF13B
Altered T Cell and B Cell Signaling in Rheumatoid Arthritis	2.58		IL1B,IL33,IL6,NFKB2,TNFSF13B
FXR/RXR Activation	2.56		C3,IL1B,IL33,ITIH4,PON1,SAA1
Xenobiotic Metabolism PXR Signaling Pathway	2.44	-1.134	ALDH1A1,ALDH1A3,Ces1e,CHST3,GSTA5,GSTM5,IL4I1
IL-6 Signaling	2.4	1.342	CD14,IL1B,IL33,IL6,NFKB2,SOCS1
Hepatic Cholestasis	2.27		CD14,CYP7B1,IL1B,IL33,IL6,NFKB2,TNFSF13B
Hepatic Fibrosis / Hepatic Stellate Cell Activation	2.19		ACTA2,CD14,EDN1,IL1B,IL6,MYH7,NFKB2
Airway Pathology in Chronic Obstructive Pulmonary Disease	2.07		IL1B,IL33,IL6,LCN2,TNFSF13B
Pancreatic Adenocarcinoma Signaling	2		CCNE1,E2F8,NFKB2,PTGS2,RAD51
HMGB1 Signaling	1.96	2	IL1B,IL33,IL6,NFKB2,RHOU,TNFSF13B
Xenobiotic Metabolism CAR Signaling Pathway	1.87	-1.633	ALDH1A1,ALDH1A3,CHST3,FMO3,GSTA5,GSTM5
Erythropoietin Signaling Pathway	1.85	-0.816	CSF2RB,IL1B,IL33,IL6,NFKB2,TNFSF13B
Ferroptosis Signaling Pathway	1.77	0.447	ANGPTL4,GCH1,GCLC,SLC39A14,TFRC
Tumor Microenvironment Pathway	1.74	2.449	CXCL12,IL1B,IL6,MMP3,NFKB2,PTGS2
Iron homeostasis signaling pathway	1.67		ATP6V0D2,GDF15,IL6,SLC39A14,TFRC
Coronavirus Pathogenesis Pathway	1.63	1.342	E2F8,IL1B,IL6,NFKB2,PTGS2
Ovarian Cancer Signaling	1.58		EDN1,PTGS1,PTGS2,RAD51,WNT10B
Systemic Lupus Erythematosus In B Cell Signaling Pathway	1.53	1.134	FCGR2B,IL1B,IL33,IL6,LILRB4,NFKB2,TNFSF13B
Osteoarthritis Pathway	1.41	2.449	ADAMTS4,ALPL,IL1B,MMP3,NFKB2,PTGS2
Dendritic Cell Maturation	1.41	2	FCGR2B,IL1B,IL33,IL6,NFKB2

## Sheet: g-h. NRCWE-054
Table S8. Perturbed IPA canonical pathways for NRCWE-051, NRCWE-052, NRCWE-053, and NRCWE-054 after 1 day of exposure.
Table S8g. Perturbed IPA canonical pathways for NRCWE-054 at 18 µg/mouse. Pathways were considered significantly perturbed if the −log (p-value) was ≥ 1.3 .					Table S8h. Perturbed IPA canonical pathways for NRCWE-054 at 54 µg/mouse. Pathways were considered significantly perturbed if the −log (p-value) was ≥ 1.3 .
Ingenuity Canonical Pathways	−log(p-value)	z-score	Molecules		Ingenuity Canonical Pathways	−log(p-value)	z-score	Molecules
Agranulocyte Adhesion and Diapedesis	9.9		CCL17,Ccl2,Ccl7,Ccl8,Ccl9,CXCL10,CXCL12,Cxcl3,CXCL6,CXCR1,FN1,IL33,MMP12,MMP3,MYH7,TNF		Agranulocyte Adhesion and Diapedesis	11.1		ACTA2,CCL17,Ccl2,CCL3L3,Ccl7,Ccl8,Ccl9,CXCL10,CXCL12,Cxcl3,CXCL6,CXCR1,CXCR2,FN1,IL1B,IL33,MMP3,MYH7,SELP
Granulocyte Adhesion and Diapedesis	7.66		CCL17,Ccl2,Ccl7,Ccl8,Ccl9,CXCL10,CXCL12,Cxcl3,CXCL6,IL33,MMP12,MMP3,TNF		Granulocyte Adhesion and Diapedesis	8.11		CCL17,Ccl2,CCL3L3,Ccl7,Ccl8,Ccl9,CXCL10,CXCL12,Cxcl3,CXCL6,CXCR2,IL1B,IL33,MMP3,SELP
Xenobiotic Metabolism AHR Signaling Pathway	6.87	-1	ALDH1A1,ALDH1A3,ALDH6A1,GSTA3,GSTA5,GSTM5,IL6,PON1,TNF		Xenobiotic Metabolism AHR Signaling Pathway	8.07	-0.905	ALDH1A1,ALDH1A3,ALDH6A1,GSTA3,GSTA5,GSTM4,GSTM5,IL1B,IL6,NFKB2,PON1
IL-10 Signaling	5.91		ARG2,CCR5,CD14,FCGR2A,FCGR2B,IL33,IL6,TNF		LXR/RXR Activation	7.02	0	ABCA1,ARG2,C3,CD14,HPX,IL1B,IL33,IL6,ITIH4,NFKB2,PON1,SAA1
Aryl Hydrocarbon Receptor Signaling	5.37	2	ALDH1A1,ALDH1A3,ALDH6A1,CCNA2,GSTA3,GSTA5,GSTM5,IL6,POLA1,TNF		Cell Cycle Control of Chromosomal Replication	7.01	3	CDT1,LIG1,MCM2,MCM3,MCM5,MCM6,MCM7,PRIM1,TOP2A
LXR/RXR Activation	5.26	-0.333	ARG2,C3,CD14,IL33,IL6,ITIH4,PON1,SAA1,TNF		Aryl Hydrocarbon Receptor Signaling	6.89	2.449	ALDH1A1,ALDH1A3,ALDH6A1,CCNA2,CCNE1,GSTA3,GSTA5,GSTM4,GSTM5,IL1B,IL6,MCM7,NFKB2
LPS/IL-1 Mediated Inhibition of RXR Function	5.24		ALDH1A1,ALDH1A3,ALDH6A1,CD14,CHST7,FMO3,GSTA3,GSTA5,GSTM5,HMGCS2,IL33,TNF		LPS/IL-1 Mediated Inhibition of RXR Function	6.25		ABCA1,ALDH1A1,ALDH1A3,ALDH6A1,CD14,FABP1,FMO3,GSTA3,GSTA5,GSTM4,GSTM5,HMGCS2,IL1B,IL33,IL4I1
Communication between Innate and Adaptive Immune Cells	4.89		Ccl9,CSF2,CXCL10,IL33,IL6,TNF,TNFSF13B		Acute Phase Response Signaling	5.75	3.162	C3,CFB,CP,FN1,HPX,IL1B,IL33,IL6,ITIH4,NFKB2,SAA1,SERPINA3,SERPIND1
Role of Macrophages, Fibroblasts and Endothelial Cells in Rheumatoid Arthritis	4.89		CEBPD,CEBPE,CREB5,CSF2,CXCL12,FN1,IL33,IL6,MMP3,PDIA3,TNF,TNFSF13B,WIF1,WNT10B		Role of IL-17F in Allergic Inflammatory Airway Diseases	4.66	2.236	CREB5,CXCL10,CXCL6,IL1B,IL6,NFKB2
Acute Phase Response Signaling	4.51	2.646	C3,CFB,FN1,IL33,IL6,ITIH4,SAA1,SERPINA3,SERPIND1,TNF		Xenobiotic Metabolism Signaling	4.4		ALDH1A1,ALDH1A3,ALDH6A1,Ces1e,FMO3,GSTA3,GSTA5,GSTM4,GSTM5,IL1B,IL4I1,IL6,NFKB2,PPP2R2C
Xenobiotic Metabolism Signaling	4.26		ALDH1A1,ALDH1A3,ALDH6A1,Ces1e,CHST7,FMO3,GSTA3,GSTA5,GSTM5,IL6,MAP3K6,TNF		IL-10 Signaling	4.15		ARG2,CD14,FCGR2B,IL1B,IL33,IL6,NFKB2
Role of IL-17F in Allergic Inflammatory Airway Diseases	4.09	2	CREB5,CSF2,CXCL10,CXCL6,IL6		Xenobiotic Metabolism PXR Signaling Pathway	3.72	-1.897	ALDH1A1,ALDH1A3,ALDH6A1,Ces1e,GSTA3,GSTA5,GSTM4,GSTM5,IL4I1,PPP1R3C
Dendritic Cell Maturation	3.33	2.646	CREB5,CSF2,FCGR2A,FCGR2B,IL33,IL6,PDIA3,TNF		Atherosclerosis Signaling	3.46		CXCL12,IL1B,IL33,IL6,MMP3,NFKB2,PON1,SELP
IL-17 Signaling	3.31	2.828	CCL17,CSF2,IL33,IL6,LCN2,MMP3,TNF,TNFSF13B		Role of Hypercytokinemia/hyperchemokinemia in the Pathogenesis of Influenza	3.29	2.449	CXCL10,IL1B,IL33,IL6,ISG15,NFKB2
Xenobiotic Metabolism CAR Signaling Pathway	3.2	-2.121	ALDH1A1,ALDH1A3,ALDH6A1,CHST7,FMO3,GSTA3,GSTA5,GSTM5		Communication between Innate and Adaptive Immune Cells	3.29		CCL3L3,Ccl9,CXCL10,IL1B,IL33,IL6
Xenobiotic Metabolism PXR Signaling Pathway	3.17	-2.121	ALDH1A1,ALDH1A3,ALDH6A1,Ces1e,CHST7,GSTA3,GSTA5,GSTM5		NER Pathway	3.17	2.236	CHAF1A,CHAF1B,LIG1,POLE2,PRIM1,RFC4,TOP2A
Role of Osteoblasts, Osteoclasts and Chondrocytes in Rheumatoid Arthritis	3.02		ALPL,CSF2,CTSK,IL33,IL6,MMP3,TNF,WIF1,WNT10B		Xenobiotic Metabolism CAR Signaling Pathway	3.11	-2.333	ALDH1A1,ALDH1A3,ALDH6A1,FMO3,GSTA3,GSTA5,GSTM4,GSTM5,PPP2R2C
Tumor Microenvironment Pathway	3.01	2.828	ARG1,CSF2,CXCL12,FN1,IL6,MMP12,MMP3,TNF		FXR/RXR Activation	2.73		C3,HPX,IL1B,IL33,ITIH4,PON1,SAA1
NER Pathway	3	2.236	CHAF1A,CHAF1B,LIG1,POLA1,POLE2,RFC4		Toll-like Receptor Signaling	2.34		CD14,IL1B,IL33,NFKB2,TRAF1
Role of Hypercytokinemia/hyperchemokinemia in the Pathogenesis of Influenza	2.95	2.236	AREG,CXCL10,IL33,IL6,TNF		Role of Pattern Recognition Receptors in Recognition of Bacteria and Viruses	2.24	2.236	C1QB,C3,CLEC7A,IL1B,IL33,IL6,NFKB2
Role of Pattern Recognition Receptors in Recognition of Bacteria and Viruses	2.85	2	C1QB,C3,CSF2,IL33,IL6,TNF,TNFSF13B		NRF2-mediated Oxidative Stress Response	2.21		ACTA2,AOX1,EPHX1,FKBP5,GSTA3,GSTA5,GSTM4,GSTM5
Airway Pathology in Chronic Obstructive Pulmonary Disease	2.84		CSF2,IL33,IL6,LCN2,TNF,TNFSF13B		Role of Macrophages, Fibroblasts and Endothelial Cells in Rheumatoid Arthritis	2.21		ADAMTS4,CEBPD,CREB5,CXCL12,FN1,IL1B,IL33,IL6,MMP3,TRAF1,WNT10B
Atherosclerosis Signaling	2.64		CXCL12,IL33,IL6,MMP3,PON1,TNF		Hepatic Fibrosis / Hepatic Stellate Cell Activation	2.2		ACTA2,CD14,EDNRB,FN1,IL1B,IL6,MYH7,NFKB2
Altered T Cell and B Cell Signaling in Rheumatoid Arthritis	2.63		CSF2,IL33,IL6,TNF,TNFSF13B		IL-17 Signaling	2.03	2.646	CCL17,Chil3/Chil4,IL1B,IL33,IL6,LCN2,MMP3
FXR/RXR Activation	2.62		C3,IL33,ITIH4,PON1,SAA1,TNF		Osteoarthritis Pathway	1.87	2.121	ADAMTS4,ALPL,CREB5,CXCR2,FN1,IL1B,MMP3,NFKB2
Hepatic Cholestasis	2.33		CD14,CSF2,CYP7B1,IL33,IL6,TNF,TNFSF13B		Iron homeostasis signaling pathway	1.83		CP,GDF15,HPX,IL6,SLC39A14,TFRC
Hepatic Fibrosis / Hepatic Stellate Cell Activation	2.25		CCR5,CD14,EDN1,FN1,IL6,MYH7,TNF		Tumor Microenvironment Pathway	1.8	2.646	ARG1,CXCL12,FN1,IL1B,IL6,MMP3,NFKB2
Systemic Lupus Erythematosus In B Cell Signaling Pathway	2.08	0.707	CSF2,FCGR2A,FCGR2B,IL33,IL6,LILRB4,TNF,TNFSF13B		Role of Osteoblasts, Osteoclasts and Chondrocytes in Rheumatoid Arthritis	1.79		ADAMTS4,ALPL,CTSK,IL1B,IL33,IL6,MMP3,WNT10B
Phagosome Formation	1.92		FCGR2A,FCGR2B,FN1,MRC1,PDIA3		ILK Signaling	1.69	1.633	ACTA2,CREB5,FN1,MYH7,NFKB2,PPP2R2C,RND1
Systemic Lupus Erythematosus Signaling	1.83		FCGR2A,FCGR2B,IL33,IL6,TNF,TNFSF13B		PI3K/AKT Signaling	1.68		CSF2RB,CXCR1,CXCR2,GDF15,IL22RA2,NFKB2,PPP2R2C
Osteoarthritis Pathway	1.46	1.633	ALPL,CREB5,FN1,MMP12,MMP3,TNF		Dendritic Cell Maturation	1.53	2.236	CREB5,FCGR2B,IL1B,IL33,IL6,NFKB2
HMGB1 Signaling	1.46		CSF2,IL33,IL6,TNF,TNFSF13B		Systemic Lupus Erythematosus In B Cell Signaling Pathway	1.48	0.707	FCGR2B,IL1B,IL33,IL6,ISG15,LILRB4,NFKB2,TRAF1
Erythropoietin Signaling Pathway	1.37	-2.236	CSF2,IL33,IL6,TNF,TNFSF13B		Ferroptosis Signaling Pathway	1.4	0.447	ABCA1,ANGPTL4,GCH1,SLC39A14,TFRC
					IL-6 Signaling	1.39	2	CD14,IL1B,IL33,IL6,NFKB2
					Breast Cancer Regulation by Stathmin1	1.33	0	ADORA3,ADRB3,APLNR,CREB5,CXCR1,E2F8,EDNRB,FFAR2,GPR84,NFKB2,PPP1R3C,PPP2R2C,TUBA1C,TUBB6
					Hepatic Cholestasis	1.3		CD14,CYP7B1,IL1B,IL33,IL6,NFKB2
