# Supplementary material for: Single-Walled vs. Multi-Walled Carbon Nanotubes: Influence of Physico-Chemical Properties on Toxicogenomics Responses in Mouse Lungs
Source: Nanomaterials (Basel). 2023 Mar 15;13(6):1059. doi: 10.3390/nano13061059 (PMC10057402; doi:10.3390/nano13061059)
Supplement: Supplementary file 1 [file nanomaterials-13-01059-s001.zip › Table S9.xlsx]

## Sheet: a-c. NRCWE-061
Table S9. Perturbed IPA canonical pathways for NRCWE-061, NRCWE-062, NRCWE-063, and NRCWE-064 after 1 day of exposure.
Table S9a. Perturbed IPA canonical pathways for NRCWE-061 at 6 µg/mouse. Pathways were considered significantly perturbed if the −log (p-value) was ≥ 1.3 .					Table S9b. Perturbed IPA canonical pathways for NRCWE-061 at 18 µg/mouse. Pathways were considered significantly perturbed if the −log (p-value) was ≥ 1.3 .					Table S9c. Perturbed IPA canonical pathways for NRCWE-061 at 54 µg/mouse. Pathways were considered significantly perturbed if the −log (p-value) was ≥ 1.3 .
Ingenuity Canonical Pathways	−log(p-value)	z-score	Molecules		Ingenuity Canonical Pathways	−log(p-value)	z-score	Molecules		Ingenuity Canonical Pathways	−log(p-value)	z-score	Molecules
Circadian Rhythm Signaling	6.6		ARNTL,BHLHE40,NR1D1,PER2,PER3		Agranulocyte Adhesion and Diapedesis	8.09		CCL17,CCL2,CCL20,CCL24,Ccl7,Ccl8,Ccl9,Cxcl3,CXCL6,CXCR1		Agranulocyte Adhesion and Diapedesis	14.7		CCL11,CCL17,Ccl2,CCL2,CCL24,CCL4,Ccl7,Ccl8,Ccl9,CLDN23,CXCL10,CXCL12,CXCL16,CXCL2,Cxcl3,CXCL6,CXCR1,CXCR2,FN1,IL1B,IL1RN,IL33,MMP12,MMP19,MMP3,MMP8,MYH7,Ppbp,VCAM1
					Granulocyte Adhesion and Diapedesis	7.36		CCL17,CCL2,CCL20,CCL24,Ccl7,Ccl8,Ccl9,Cxcl3,CXCL6		Granulocyte Adhesion and Diapedesis	14.2		CCL11,CCL17,Ccl2,CCL2,CCL24,CCL4,Ccl7,Ccl8,Ccl9,CLDN23,CXCL10,CXCL12,CXCL16,CXCL2,Cxcl3,CXCL6,CXCR2,IL1B,IL1R2,IL1RN,IL33,MMP12,MMP19,MMP3,MMP8,Ppbp,VCAM1
					Acute Phase Response Signaling	6.89	2.236	C3,CFB,HPX,IL6,ITIH4,SAA1,Saa3,SERPINA3,SERPIND1		Acute Phase Response Signaling	9.51	4.123	C1R,C3,CEBPB,CFB,CP,FN1,HMOX1,HPX,IL1B,IL1RN,IL33,IL6,ITIH4,NFKB2,NFKBIA,OSM,OSMR,SAA1,Saa3,SERPINA3,SERPIND1,SERPINE1,SOD2
					LXR/RXR Activation	6	0.378	C3,CCL2,CD14,HPX,IL6,ITIH4,SAA1		Xenobiotic Metabolism AHR Signaling Pathway	9.12	-1.807	ALDH1A1,ALDH1A3,ALDH2,ALDH3A1,ALDH6A1,GSTA3,GSTA5,Gstm3,GSTM4,GSTM5,HSP90B1,IL1B,IL6,NFKB2,PON1
					IL-17 Signaling	4.99	2.646	CCL17,CCL2,CCL20,Chil3/Chil4,IL6,LCN2,TNFSF13B		Cell Cycle Control of Chromosomal Replication	8.76	3.606	CDC6,CDT1,LIG1,MCM2,MCM3,MCM4,MCM5,MCM6,MCM7,PCNA,PRIM1,PRIM2,TOP2A
					Airway Pathology in Chronic Obstructive Pulmonary Disease	3.82		CCL2,CCL20,IL6,LCN2,TNFSF13B		Role of Hypercytokinemia/hyperchemokinemia in the Pathogenesis of Influenza	8.49	3.742	CCL2,CCL4,CXCL10,IFIT3,IL1B,IL1RN,IL33,IL6,IRF7,ISG15,NFKB2,OAS1,OAS2,RSAD2
										LXR/RXR Activation	8.08	-0.243	ABCA1,APOD,ARG2,C3,CCL2,CD14,HPX,IL1B,IL1R2,IL1RN,IL33,IL6,ITIH4,KNG1,NFKB2,PON1,SAA1
										LPS/IL-1 Mediated Inhibition of RXR Function	7.84	2.236	ABCA1,ACSL4,ALDH1A1,ALDH1A3,ALDH2,ALDH3A1,ALDH6A1,CAT,CD14,FABP1,FMO3,GSTA3,GSTA5,Gstm3,GSTM4,GSTM5,HMGCS2,HS3ST6,IL1B,IL1R2,IL1RN,IL33,IL4I1
										Aryl Hydrocarbon Receptor Signaling	7.46	2.121	ALDH1A1,ALDH1A3,ALDH2,ALDH3A1,ALDH6A1,CCNA2,CCNE1,DHFR,GSTA3,GSTA5,Gstm3,GSTM4,GSTM5,HSP90B1,IL1B,IL6,MCM7,NFKB2
										IL-10 Signaling	7.44		ARG2,CCR5,CD14,FCGR2A,FCGR2B,HMOX1,IL1B,IL1R2,IL1RN,IL33,IL6,NFKB2,NFKBIA
										Role of IL-17F in Allergic Inflammatory Airway Diseases	6.1	2.646	CCL2,CCL4,CSF2,CXCL10,CXCL6,IGF1,IL1B,IL6,NFKB2
										Xenobiotic Metabolism Signaling	6.03		ALDH1A1,ALDH1A3,ALDH2,ALDH3A1,ALDH6A1,CAT,CES1,Ces1e,FMO3,GCLC,GSTA3,GSTA5,Gstm3,GSTM4,GSTM5,HMOX1,HS3ST6,HSP90B1,IL1B,IL4I1,IL6,MAP3K6,NFKB2
										Xenobiotic Metabolism PXR Signaling Pathway	5.53	-3.153	ALDH1A1,ALDH1A3,ALDH2,ALDH3A1,ALDH6A1,CAT,CES1,Ces1e,GSTA3,GSTA5,Gstm3,GSTM4,GSTM5,HS3ST6,HSP90B1,IL4I1,PRKAR2B
										IL-17 Signaling	5.18	4	CCL11,CCL17,CCL2,CEBPB,Chil3/Chil4,CSF2,HSP90B1,IL1B,IL33,IL6,LCN2,MMP3,MUC5B,OSM,TNFSF13B,TNFSF15
										Role of Macrophages, Fibroblasts and Endothelial Cells in Rheumatoid Arthritis	4.92		ADAMTS4,CCL2,CEBPB,CEBPD,CEBPE,CSF2,CXCL12,FN1,IL1B,IL1R2,IL1RN,IL33,IL6,MMP3,NFKBIA,OSM,PDIA3,SFRP1,SFRP2,TNFSF13B,TRAF1,VCAM1,WNT1
										Communication between Innate and Adaptive Immune Cells	4.84		CCL4,Ccl9,CD83,CSF2,CXCL10,IL1B,IL1RN,IL33,IL6,TNFSF13B
										Atherosclerosis Signaling	4.77		APOD,CCL11,CCL2,COL3A1,CXCL12,IL1B,IL1RN,IL33,IL6,MMP3,NFKB2,PON1,VCAM1
										Tumor Microenvironment Pathway	4.61	4	ARG1,CCL2,CSF2,CXCL12,FN1,IGF1,IL1B,IL6,MMP12,MMP19,MMP3,MMP8,NFKB2,OSM,SPP1,TNC
										Role of Osteoblasts, Osteoclasts and Chondrocytes in Rheumatoid Arthritis	4.53		ADAMTS4,ALPL,CSF2,CTSK,GSN,IGF1,IL1B,IL1R2,IL1RN,IL33,IL6,MMP3,MMP8,NFKBIA,SFRP1,SFRP2,SPP1,WNT1
										IL-17A Signaling in Fibroblasts	4.52		CCL2,CEBPB,CEBPD,IL6,LCN2,NFKB2,NFKBIA
										Role of Pattern Recognition Receptors in Recognition of Bacteria and Viruses	4.39	2.449	C1QB,C3,CLEC7A,CSF2,IL1B,IL33,IL6,IRF7,NFKB2,OAS1,OAS2,OSM,TNFSF13B,TNFSF15
										Differential Regulation of Cytokine Production in Macrophages and T Helper Cells by IL-17A and IL-17F	4.39	2.236	CCL2,CCL4,CSF2,IL1B,IL6
										Hepatic Fibrosis / Hepatic Stellate Cell Activation	4.33		CCL2,CCR5,CD14,COL3A1,CYP2E1,FN1,IGF1,IGFBP3,IL1B,IL1R2,IL6,MYH7,NFKB2,SERPINE1,TIMP1,VCAM1
										Differential Regulation of Cytokine Production in Intestinal Epithelial Cells by IL-17A and IL-17F	4.1	2.236	CCL2,CCL4,CSF2,IL1B,LCN2
										Nicotine Degradation II	4.09	-2.828	AOX1,Aox3,CYP2E1,CYP2F1,CYP2S1,CYP4F8,FMO3,INMT
										FXR/RXR Activation	4.06		APOD,C3,FETUB,HPX,IL1B,IL1RN,IL33,ITIH4,KNG1,PON1,SAA1,VLDLR
										Putrescine Degradation III	3.84	-0.447	ALDH1A1,ALDH1A3,ALDH2,ALDH3A1,IL4I1
										Airway Pathology in Chronic Obstructive Pulmonary Disease	3.83		APOD,CCL2,CSF2,IL1B,IL33,IL6,LCN2,MMP8,OSM,TNFSF13B,TNFSF15
										NRF2-mediated Oxidative Stress Response	3.81	0	AOX1,CAT,DNAJB11,DNAJB13,EPHX1,FKBP5,GCLC,GSTA3,GSTA5,Gstm3,GSTM4,GSTM5,HMOX1,MAFF,SOD2
										Ethanol Degradation IV	3.62	-1.342	ALDH1A1,ALDH1A3,ALDH2,ALDH3A1,CAT
										Complement System	3.56	0.447	C1QB,C1R,C3,CFB,CFI,ITGAX
										Pyrimidine Deoxyribonucleotides De Novo Biosynthesis I	3.52	1.342	AK8,NME1,NME2,RRM2,TYMS
										Tryptophan Degradation X (Mammalian, via Tryptamine)	3.52	-0.447	ALDH1A1,ALDH1A3,ALDH2,ALDH3A1,IL4I1
										Dopamine Degradation	3.42	-0.447	ALDH1A1,ALDH1A3,ALDH2,ALDH3A1,IL4I1
										Hepatic Cholestasis	3.41		CD14,CSF2,CYP7B1,IL1B,IL1R2,IL1RN,IL33,IL6,NFKB2,NFKBIA,OSM,PRKAR2B,TNFSF13B,TNFSF15
										Systemic Lupus Erythematosus In B Cell Signaling Pathway	3.29	2.183	CSF2,FCGR2A,FCGR2B,IFIT3,IL1B,IL33,IL6,IRF7,ISG15,LILRB4,MALT1,NFKB2,OSM,STING1,TNFSF13B,TNFSF15,TRAF1
										Activation of IRF by Cytosolic Pattern Recognition Receptors	3.28	0.378	DHX58,IL6,IRF7,ISG15,NFKB2,NFKBIA,ZBP1
										Xenobiotic Metabolism CAR Signaling Pathway	3.25	-2.496	ALDH1A1,ALDH1A3,ALDH2,ALDH3A1,ALDH6A1,FMO3,GSTA3,GSTA5,Gstm3,GSTM4,GSTM5,HS3ST6,HSP90B1
										Glutathione-mediated Detoxification	3.24	-2.236	GSTA3,GSTA5,Gstm3,GSTM4,GSTM5
										TREM1 Signaling	3.17	2.828	CCL2,CD83,CSF2,FCGR2B,IL1B,IL6,ITGAX,NFKB2
										Glucocorticoid Receptor Signaling	3.09		ARG2,BRCA1,CCL11,CCL2,CSF2,CSF2RB,CXCR1,CXCR2,FKBP5,GABPB1,HSP90B1,HSPA5,IGF1,IL1B,IL1R2,IL1RN,IL22RA2,IL6,MMP3,MMP8,NFKBIA,SERPINE1,SLPI,VCAM1
										Unfolded protein response	3.08	2.646	CALR,CEBPB,CEBPD,CEBPE,HSP90B1,HSPA5,PDIA6
										Toll-like Receptor Signaling	3.08	1.633	CD14,IL1B,IL1RN,IL33,NFKB2,NFKBIA,TNFAIP3,TRAF1
										Airway Inflammation in Asthma	3.01		CCL2,CSF2,IL33,OSM,RNASE2
										Noradrenaline and Adrenaline Degradation	2.94	-0.447	ALDH1A1,ALDH1A3,ALDH2,ALDH3A1,IL4I1
										Nicotine Degradation III	2.92	-2.449	AOX1,Aox3,CYP2E1,CYP2F1,CYP2S1,CYP4F8
										Dendritic Cell Maturation	2.91	3.317	CD83,COL3A1,CSF2,FCGR2A,FCGR2B,IL1B,IL1RN,IL33,IL6,NFKB2,NFKBIA,PDIA3
										NER Pathway	2.82	2.449	CHAF1A,CHAF1B,LIG1,PCNA,POLE2,PRIM1,PRIM2,RFC4,TOP2A
										Altered T Cell and B Cell Signaling in Rheumatoid Arthritis	2.82		CSF2,IL1B,IL1RN,IL33,IL6,NFKB2,SPP1,TNFSF13B
										Role of Cytokines in Mediating Communication between Immune Cells	2.5		CSF2,IL1B,IL1RN,IL33,IL6
										Coronavirus Replication Pathway	2.45	1.342	Ifitm7,TUBA1C,TUBB,TUBB2A,TUBB6
										Inhibition of Matrix Metalloproteases	2.45	-1.342	MMP12,MMP19,MMP3,MMP8,TIMP1
										HMGB1 Signaling	2.42	2.646	CCL2,CSF2,IL1B,IL33,IL6,NFKB2,OSM,SERPINE1,TNFSF13B,TNFSF15,VCAM1
										Erythropoietin Signaling Pathway	2.23	-2.111	CSF2,CSF2RB,IL1B,IL33,IL6,NFKB2,NFKBIA,OSM,TNFSF13B,TNFSF15,WNT1
										Phagosome Maturation	2.21		ATP6V0D2,CALR,CTSC,CTSF,CTSK,TCTE3,TUBA1C,TUBB,TUBB2A,TUBB6
										VDR/RXR Activation	2.2	1	CD14,CEBPB,CSF2,CXCL10,IGFBP3,IGFBP6,SPP1
										IL-17A Signaling in Airway Cells	2.15	1.342	CCL11,CXCL6,IL6,MUC5B,NFKB2,NFKBIA
										IL-6 Signaling	2.1	2.828	CD14,CEBPB,IL1B,IL1R2,IL1RN,IL33,IL6,NFKB2,NFKBIA
										Serotonin Degradation	2.08	-0.447	ALDH1A1,ALDH1A3,ALDH2,ALDH3A1,IL4I1
										Superpathway of Melatonin Degradation	2.04	-1.342	CYP2E1,CYP2F1,CYP2S1,CYP4F8,IL4I1
										Osteoarthritis Pathway	1.89	3.317	ADAMTS4,ALPL,CEBPB,CXCR2,DCN,FN1,IL1B,IL1R2,MMP12,MMP3,NFKB2,SPP1
										Crosstalk between Dendritic Cells and Natural Killer Cells	1.89	2.236	CD209,CD83,CSF2,CSF2RB,IL6,NFKB2
										Coronavirus Pathogenesis Pathway	1.89	1	CCL2,E2F8,IL1B,IL6,IRF7,NFKB2,NFKBIA,SERPINE1,STING1
										Role of MAPK Signaling in Inhibiting the Pathogenesis of Influenza	1.86	1.633	CCL2,CXCL10,IL1B,IL6,NFKB2,NFKBIA
										Small Cell Lung Cancer Signaling	1.84		CCNE1,CKS1B,FHIT,NFKB2,NFKBIA,TRAF1
										Chemokine Signaling	1.73	2.449	CCL11,CCL2,CCL24,CCL4,CCR5,CXCL12
										HIF1α Signaling	1.66	2.111	HK3,HMOX1,HSPA5,IGF1,IL6,LDHB,MMP12,MMP19,MMP3,MMP8,SERPINE1
										Antioxidant Action of Vitamin C	1.63	-2.449	CSF2,CSF2RB,HMOX1,NFKB2,NFKBIA,PDIA3,SLC23A3
										PPAR Signaling	1.63	-2.646	HSP90B1,IL1B,IL1R2,IL1RN,IL33,NFKB2,NFKBIA
										Hepatic Fibrosis Signaling Pathway	1.57	2.668	CCL2,CEBPB,COL3A1,IL1B,IL1R2,IL1RN,IL33,NFKB2,NFKBIA,PRKAR2B,SERPINE1,SOD2,SPP1,TFRC,TIMP1,VCAM1,WNT1
										Xenobiotic Metabolism General Signaling Pathway	1.57	-0.707	GCLC,GSTA3,GSTA5,Gstm3,GSTM4,GSTM5,HMOX1,MAP3K6
										Eicosanoid Signaling	1.52		LTB4R,LTC4S,PTGES,PTGIR,PTGS1
										Iron homeostasis signaling pathway	1.52		ATP6V0D2,CP,GDF15,HMOX1,HPX,IL6,SLC39A14,TFRC
										Pancreatic Adenocarcinoma Signaling	1.51	1	CCNE1,CYP2E1,E2F8,HBEGF,HMOX1,NFKB2,RAD51
										Th17 Activation Pathway	1.5	1.342	CSF2,HSP90B1,IL1B,IL6,NFKB2
										CD40 Signaling	1.5	-1	NFKB2,NFKBIA,PTGS1,TNFAIP3,TRAF1
										Remodeling of Epithelial Adherens Junctions	1.47		NME1,TUBA1C,TUBB,TUBB2A,TUBB6
										Breast Cancer Regulation by Stathmin1	1.38	2.294	ADGRF3,ADORA3,ADRB3,CCR5,CXCR1,E2F8,FFAR2,GPR171,GPR65,GPR84,HCAR2,IGF1,LTB4R,NFKB2,P2RY10,P2RY2,PRKAR2B,PTAFR,PTGIR,TUBA1C,TUBB,TUBB2A,TUBB6
										NF-κB Signaling	1.32	1.667	IL1B,IL1R2,IL1RN,IL33,MALT1,NFKB2,NFKBIA,TNFAIP3,TNFSF13B
										HOTAIR Regulatory Pathway	1.31	1.414	MMP12,MMP19,MMP3,MMP8,NFKB2,NFKBIA,SPP1,WNT1

## Sheet: d-e. NRCWE-062
Table S9. Perturbed IPA canonical pathways for NRCWE-061, NRCWE-062, NRCWE-063, and NRCWE-064 after 1 day of exposure.
Table S9d. Perturbed IPA canonical pathways for NRCWE-062 at 18 µg/mouse. Pathways were considered significantly perturbed if the −log (p-value) was ≥ 1.3 .					Table S9e. Perturbed IPA canonical pathways for NRCWE-062 at 54 µg/mouse. Pathways were considered significantly perturbed if the −log (p-value) was ≥ 1.3 .
Ingenuity Canonical Pathways	−log(p-value)	z-score	Molecules		Ingenuity Canonical Pathways	−log(p-value)	z-score	Molecules
Agranulocyte Adhesion and Diapedesis	14.8		CCL17,Ccl2,CCL2,CCL20,CCL24,CCL4,Ccl7,Ccl8,Ccl9,CXCL12,CXCL2,Cxcl3,CXCL6,CXCR1,MYH7		Granulocyte Adhesion and Diapedesis	19.9		CCL11,CCL17,Ccl2,CCL2,CCL20,CCL24,CCL3L3,CCL4,Ccl7,Ccl8,Ccl9,CXCL10,CXCL12,CXCL16,CXCL2,Cxcl3,CXCL6,CXCR2,IL1B,IL1R2,IL1RN,IL33,MMP19,MMP3,MMP9,SELP,TNF,TNFRSF1B,VCAM1
Granulocyte Adhesion and Diapedesis	14.1		CCL17,Ccl2,CCL2,CCL20,CCL24,CCL4,Ccl7,Ccl8,Ccl9,CXCL12,CXCL2,Cxcl3,CXCL6,FPR1		Agranulocyte Adhesion and Diapedesis	17.4		CCL11,CCL17,Ccl2,CCL2,CCL20,CCL24,CCL3L3,CCL4,Ccl7,Ccl8,Ccl9,CXCL10,CXCL12,CXCL16,CXCL2,Cxcl3,CXCL6,CXCR2,IL1B,IL1RN,IL33,MMP19,MMP3,MMP9,MYH7,SELP,TNF,VCAM1
LXR/RXR Activation	6.1	1.134	ARG2,C3,CCL2,CD14,HPX,ITIH4,SAA1		LPS/IL-1 Mediated Inhibition of RXR Function	11.4	1.89	ABCA1,ACSL4,ALDH1A1,ALDH1A3,ALDH2,ALDH6A1,CD14,FABP1,FABP3,FMO2,FMO3,GSTA3,GSTA5,Gstm3,GSTM5,HMGCS2,IL1B,IL1R2,IL1RN,IL33,IL4I1,SLCO1A2,TNF,TNFRSF1B
Acute Phase Response Signaling	5.9	2.236	C3,CFB,CP,HPX,ITIH4,SAA1,Saa3,SERPINA3		LXR/RXR Activation	11.2	-0.471	ABCA1,ARG2,C3,CCL2,CD14,CLU,HPX,IL1B,IL1R2,IL1RN,IL33,IL6,ITIH4,KNG1,MMP9,SAA1,TNF,TNFRSF1B
IL-17 Signaling	4.05	2.449	CCL17,CCL2,CCL20,CSF2,LCN2,TNFSF15		Role of Hypercytokinemia/hyperchemokinemia in the Pathogenesis of Influenza	10.3	3.742	CCL2,CCL4,CXCL10,IFIT3,IL1B,IL1RN,IL33,IL6,IRF7,ISG15,OAS1,PYCARD,RSAD2,TNF
Airway Pathology in Chronic Obstructive Pulmonary Disease	3.89		CCL2,CCL20,CSF2,LCN2,TNFSF15		Acute Phase Response Signaling	8.07	3.464	C3,CFB,CP,HMOX1,HPX,IL1B,IL1RN,IL33,IL6,ITIH4,OSM,RBP7,SAA1,Saa3,SERPINA3,SERPIND1,TNF,TNFRSF1B
FXR/RXR Activation	3.68		C3,FETUB,HPX,ITIH4,SAA1		Atherosclerosis Signaling	8.05		CCL11,CCL2,CCR3,CLU,CXCL12,IL1B,IL1RN,IL33,IL6,MMP3,MMP9,PLB1,SELP,TNF,VCAM1
Hepatic Cholestasis	2.86		CD14,CSF2,CYP7B1,SLCO1A2,TNFSF15		Communication between Innate and Adaptive Immune Cells	7.1		CCL3L3,CCL4,Ccl9,CSF2,CXCL10,IL1B,IL1RN,IL33,IL6,TNF,TNFSF13B
Hepatic Fibrosis / Hepatic Stellate Cell Activation	2.79		CCL2,CD14,IGFBP3,MYH7,TIMP1		IL-10 Signaling	7.03		ARG2,CCR5,CD14,FCGR2B,HMOX1,IL1B,IL1R2,IL1RN,IL33,IL6,TNF
					Xenobiotic Metabolism AHR Signaling Pathway	6.82	-0.905	ALDH1A1,ALDH1A3,ALDH2,ALDH6A1,GSTA3,GSTA5,Gstm3,GSTM5,IL1B,IL6,TNF
					Differential Regulation of Cytokine Production in Macrophages and T Helper Cells by IL-17A and IL-17F	6.55	2.449	CCL2,CCL4,CSF2,IL1B,IL6,TNF
					Differential Regulation of Cytokine Production in Intestinal Epithelial Cells by IL-17A and IL-17F	6.17	2.449	CCL2,CCL4,CSF2,IL1B,LCN2,TNF
					Role of IL-17F in Allergic Inflammatory Airway Diseases	6.12	2.646	CCL2,CCL4,CREB5,CSF2,CXCL10,CXCL6,IL1B,IL6
					Hepatic Fibrosis / Hepatic Stellate Cell Activation	6.12		CCL2,CCN2,CCR5,CD14,COL6A2,IL1B,IL1R2,IL6,LEPR,MMP9,MYH7,PDGFRA,TIMP1,TNF,TNFRSF1B,VCAM1
					Airway Inflammation in Asthma	5.97		CCL2,CCL20,CSF2,IL33,MMP9,OSM,RNASE2
					Role of Osteoblasts, Osteoclasts and Chondrocytes in Rheumatoid Arthritis	5.83		ADAMTS4,ALPL,CSF2,CTSK,DKK3,GSN,IL1B,IL1R2,IL1RN,IL33,IL6,MMP3,SFRP1,SPP1,TNF,TNFRSF1B,WNT10B
					Tumor Microenvironment Pathway	5.7	3.357	ARG1,CCL2,CSF2,CXCL12,IL1B,IL6,LEPR,MMP19,MMP3,MMP9,OSM,SPP1,TIAM1,TNC,TNF
					IL-17 Signaling	5.55	3.742	CCL11,CCL17,CCL2,CCL20,CSF2,IL1B,IL33,IL6,LCN2,MMP3,MMP9,OSM,TNF,TNFSF13B
					Role of Macrophages, Fibroblasts and Endothelial Cells in Rheumatoid Arthritis	5.53		ADAMTS4,CCL2,CEBPE,CREB5,CSF2,CXCL12,DKK3,IL1B,IL1R2,IL1RN,IL33,IL6,MMP3,OSM,SFRP1,TNF,TNFRSF1B,TNFSF13B,VCAM1,WNT10B
					FXR/RXR Activation	5.47		C3,CLU,FETUB,HPX,IL1B,IL1RN,IL33,ITIH4,KNG1,SAA1,TNF,VLDLR
					Airway Pathology in Chronic Obstructive Pulmonary Disease	5.12		CCL2,CCL20,CSF2,IL1B,IL33,IL6,LCN2,MMP9,OSM,TNF,TNFSF13B
					Cell Cycle Control of Chromosomal Replication	4.98	2.828	CDC6,CDT1,LIG1,MCM2,MCM3,MCM6,PCNA,PRIM1
					Hepatic Cholestasis	4.92		CD14,CSF2,CYP7B1,IL1B,IL1R2,IL1RN,IL33,IL6,OSM,PRKAR2B,SLCO1A2,TNF,TNFRSF1B,TNFSF13B
					Tryptophan Degradation X (Mammalian, via Tryptamine)	4.18	0	AKR1B10,ALDH1A1,ALDH1A3,ALDH2,IL4I1
					Role of Cytokines in Mediating Communication between Immune Cells	4.11		CSF2,IL1B,IL1RN,IL33,IL6,TNF
					Aryl Hydrocarbon Receptor Signaling	4.08		ALDH1A1,ALDH1A3,ALDH2,ALDH6A1,GSTA3,GSTA5,Gstm3,GSTM5,IL1B,IL6,TNF
					Role of Pattern Recognition Receptors in Recognition of Bacteria and Viruses	3.88	2.236	C3,CLEC7A,CSF2,IL1B,IL33,IL6,IRF7,OAS1,OSM,TNF,TNFSF13B
					Altered T Cell and B Cell Signaling in Rheumatoid Arthritis	3.75		CSF2,IL1B,IL1RN,IL33,IL6,SPP1,TNF,TNFSF13B
					Xenobiotic Metabolism Signaling	3.64		ALDH1A1,ALDH1A3,ALDH2,ALDH6A1,FMO2,FMO3,GSTA3,GSTA5,Gstm3,GSTM5,HMOX1,IL1B,IL4I1,IL6,TNF
					Eicosanoid Signaling	3.61		DPEP1,LTB4R,LTC4S,PLB1,PTGES,PTGIR,PTGS1
					Xenobiotic Metabolism PXR Signaling Pathway	3.35	-1.508	ALDH1A1,ALDH1A3,ALDH2,ALDH6A1,GSTA3,GSTA5,Gstm3,GSTM5,IL4I1,PPP1R14D,PRKAR2B
					Activation of IRF by Cytosolic Pattern Recognition Receptors	3.26	0.816	DHX58,IL6,IRF7,ISG15,TNF,ZBP1
					Graft-versus-Host Disease Signaling	3.19		IL1B,IL1RN,IL33,IL6,TNF
					Chemokine Signaling	3.1	2.646	CCL11,CCL2,CCL24,CCL4,CCR3,CCR5,CXCL12
					HMGB1 Signaling	2.97	2.828	CCL2,CSF2,IL1B,IL33,IL6,OSM,TNF,TNFRSF1B,TNFSF13B,VCAM1
					Dendritic Cell Maturation	2.97	2.333	CREB5,CSF2,FCGR2B,IL1B,IL1RN,IL33,IL6,LEPR,TNF,TNFRSF1B
					Hepatic Fibrosis Signaling Pathway	2.94	1.698	CCL2,CCN2,CREB5,IL1B,IL1R2,IL1RN,IL33,LEPR,PDGFRA,PRKAR2B,SPP1,TFRC,TIMP1,TNF,TNFRSF1B,VCAM1,WNT10B
					Systemic Lupus Erythematosus In B Cell Signaling Pathway	2.87	2.496	CSF2,FCGR2B,IFIT3,IL1B,IL33,IL6,IRF7,ISG15,LILRB4,MALT1,OSM,TNF,TNFSF13B
					Xenobiotic Metabolism CAR Signaling Pathway	2.82	-2.53	ALDH1A1,ALDH1A3,ALDH2,ALDH6A1,FMO2,FMO3,GSTA3,GSTA5,Gstm3,GSTM5
					TREM1 Signaling	2.57	2.449	CCL2,CSF2,FCGR2B,IL1B,IL6,TNF
					Crosstalk between Dendritic Cells and Natural Killer Cells	2.57	2.449	CD209,CSF2,CSF2RB,IL6,TNF,TNFRSF1B
					Role of MAPK Signaling in Inhibiting the Pathogenesis of Influenza	2.54	2.449	CCL2,CXCL10,IL1B,IL6,PLB1,TNF
					Osteoarthritis Pathway	2.52	2.714	ADAMTS4,ALPL,CREB5,CXCR2,IL1B,IL1R2,MMP3,MMP9,SPP1,TNF,TNFRSF1B
					NER Pathway	2.47	2.449	CHAF1A,CHAF1B,LIG1,PCNA,POLE2,PRIM1,RFC4
					IL-6 Signaling	2.45	2.646	CD14,IL1B,IL1R2,IL1RN,IL33,IL6,TNF,TNFRSF1B
					Neuroinflammation Signaling Pathway	2.38	3.606	CCL2,CREB5,CXCL10,CXCL12,HMOX1,IL1B,IL6,IRF7,MMP3,MMP9,PYCARD,TNF,VCAM1
					PPAR Signaling	2.35	-1.89	IL1B,IL1R2,IL1RN,IL33,PDGFRA,TNF,TNFRSF1B
					PXR/RXR Activation	2.17		ALDH1A1,HMGCS2,IL6,PRKAR2B,TNF
					p38 MAPK Signaling	2.13	2.646	CREB5,IL1B,IL1R2,IL1RN,IL33,TNF,TNFRSF1B
					NF-κB Signaling	2.13	2.333	IL1B,IL1R2,IL1RN,IL33,MALT1,PDGFRA,TNF,TNFRSF1B,TNFSF13B
					Glucocorticoid Receptor Signaling	1.93		ARG2,BRCA1,CCL11,CCL2,CSF2,CSF2RB,CXCR2,IL1B,IL1R2,IL1RN,IL6,MMP3,MMP9,SLPI,TNF,VCAM1
					Toll-like Receptor Signaling	1.84	2	CD14,IL1B,IL1RN,IL33,TNF
					Dopamine Receptor Signaling	1.79		GCH1,IL4I1,PPP1R14D,PPP1R1B,PRKAR2B
					Adrenomedullin signaling pathway	1.78	0.333	C3,IL1B,IL1RN,IL33,MATK,NPR2,NPR3,PRKAR2B,TNF
					Iron homeostasis signaling pathway	1.78		CP,HMOX1,HPX,IL6,PDGFRA,SLC39A14,TFRC
					Erythropoietin Signaling Pathway	1.77	-2.121	CSF2,CSF2RB,IL1B,IL33,IL6,OSM,TNF,TNFSF13B
					Antioxidant Action of Vitamin C	1.77	-2.236	CSF2,CSF2RB,HMOX1,PLB1,SLC23A3,TNF
					Systemic Lupus Erythematosus Signaling	1.69		FCGR2B,IL1B,IL1RN,IL33,IL6,KNG1,TNF,TNFSF13B
					VDR/RXR Activation	1.68		CD14,CSF2,CXCL10,IGFBP6,SPP1
					Role of Tissue Factor in Cancer	1.58		CCN2,CSF2,F10,F7,HBEGF,IL1B
					cAMP-mediated signaling	1.46	1.667	ADORA3,ADRB3,CREB5,CXCR2,HCAR2,LTB4R,NPR3,PRKAR2B,PTGIR
					Ferroptosis Signaling Pathway	1.42	0.816	ABCA1,ACSL4,GCH1,HMOX1,SLC39A14,TFRC
					Gαi Signaling	1.41	1.633	ADORA3,CXCR2,HCAR2,LTB4R,NPR3,PRKAR2B

## Sheet: f-g. NRCWE-063
Table S9. Perturbed IPA canonical pathways for NRCWE-061, NRCWE-062, NRCWE-063, and NRCWE-064 after 1 day of exposure.
Table S9f. Perturbed IPA canonical pathways for NRCWE-063 at 6 µg/mouse. Pathways were considered significantly perturbed if the −log (p-value) was ≥ 1.3 .					Table S9g. Perturbed IPA canonical pathways for NRCWE-063 at 54 µg/mouse. Pathways were considered significantly perturbed if the −log (p-value) was ≥ 1.3 .
Ingenuity Canonical Pathways	−log(p-value)	z-score	Molecules		Ingenuity Canonical Pathways	−log(p-value)	z-score	Molecules
Circadian Rhythm Signaling	6.6		ARNTL,BHLHE40,NR1D1,PER2,PER3		Agranulocyte Adhesion and Diapedesis	18.7		CCL11,CCL17,Ccl2,CCL2,CCL20,CCL24,CCL4,Ccl7,Ccl8,Ccl9,CXCL10,CXCL12,CXCL16,CXCL2,Cxcl3,CXCL6,CXCR1,IL1B,IL1RN,IL33,MMP19,MMP3,MYH7,TNF
					Granulocyte Adhesion and Diapedesis	18.6		CCL11,CCL17,Ccl2,CCL2,CCL20,CCL24,CCL4,Ccl7,Ccl8,Ccl9,CXCL10,CXCL12,CXCL16,CXCL2,Cxcl3,CXCL6,IL1B,IL1R2,IL1RN,IL33,MMP19,MMP3,TNF
					Acute Phase Response Signaling	11.8	3.051	AKT1,C3,CFB,CP,HPX,IL1B,IL1RN,IL33,IL6,ITIH4,MAPK11,OSM,SAA1,Saa3,SERPINA3,SERPIND1,SOD2,TNF
					LXR/RXR Activation	11.5	-0.775	ABCA1,ARG2,C3,CCL2,CD14,HPX,IL1B,IL1R2,IL1RN,IL33,IL6,ITIH4,PON1,SAA1,TNF
					IL-17 Signaling	11.4	3.638	AKT1,CCL11,CCL17,CCL2,CCL20,CSF2,HSP90B1,IL1B,IL33,IL6,LCN2,MAPK11,MMP3,MUC5B,OSM,TNF,TNFSF15
					IL-10 Signaling	9.4		ARG2,CCR5,CD14,FCGR2B,IL1B,IL1R2,IL1RN,IL33,IL6,MAPK11,TNF
					Differential Regulation of Cytokine Production in Macrophages and T Helper Cells by IL-17A and IL-17F	7.9	2.449	CCL2,CCL4,CSF2,IL1B,IL6,TNF
					Unfolded protein response	7.77	2.828	CALR,CEBPE,HSP90B1,HSPA1A/HSPA1B,Hspa1b,HSPA5,HSPA8,HSPH1,PDIA6
					Differential Regulation of Cytokine Production in Intestinal Epithelial Cells by IL-17A and IL-17F	7.52	2.449	CCL2,CCL4,CSF2,IL1B,LCN2,TNF
					Communication between Innate and Adaptive Immune Cells	7.06		CCL4,Ccl9,CSF2,CXCL10,IL1B,IL1RN,IL33,IL6,TNF
					FXR/RXR Activation	6.91		AKT1,C3,FETUB,HPX,IL1B,IL1RN,IL33,ITIH4,PON1,SAA1,TNF
					LPS/IL-1 Mediated Inhibition of RXR Function	6.79	1.633	ABCA1,ALDH1A3,CD14,FMO3,GSTA3,GSTA5,HMGCS2,IL1B,IL1R2,IL1RN,IL33,IL4I1,SLCO1A2,TNF
					Role of IL-17F in Allergic Inflammatory Airway Diseases	6.53	2.449	CCL2,CCL4,CSF2,CXCL10,CXCL6,IL1B,IL6
					Airway Pathology in Chronic Obstructive Pulmonary Disease	6.36		CCL2,CCL20,CSF2,IL1B,IL33,IL6,LCN2,OSM,TNF,TNFSF15
					Glucocorticoid Receptor Signaling	6.13		AKT1,ARG2,CCL11,CCL2,CSF2,CSF2RB,CXCR1,HSP90B1,HSPA1A/HSPA1B,Hspa1b,HSPA5,HSPA8,IL1B,IL1R2,IL1RN,IL6,MAPK11,MMP3,TNF
					Airway Inflammation in Asthma	6.08		CCL2,CCL20,CSF2,IL33,OSM,RNASE2
					Atherosclerosis Signaling	5.98		CCL11,CCL2,CXCL12,IL1B,IL1RN,IL33,IL6,MMP3,PON1,TNF
					Role of Hypercytokinemia/hyperchemokinemia in the Pathogenesis of Influenza	5.93	2.828	CCL2,CCL4,CXCL10,IL1B,IL1RN,IL33,IL6,TNF
					Hepatic Cholestasis	5.92		CD14,CSF2,CYP7B1,IL1B,IL1R2,IL1RN,IL33,IL6,OSM,SLCO1A2,TNF,TNFSF15
					Xenobiotic Metabolism AHR Signaling Pathway	5.73	0	ALDH1A3,GSTA3,GSTA5,HSP90B1,IL1B,IL6,PON1,TNF
					HMGB1 Signaling	5.65	1.89	AKT1,CCL2,CSF2,IL1B,IL33,IL6,MAPK11,OSM,RND1,TNF,TNFSF15
					Role of Cytokines in Mediating Communication between Immune Cells	5.4		CSF2,IL1B,IL1RN,IL33,IL6,TNF
					Tumor Microenvironment Pathway	5.18	2.714	AKT1,ARG1,CCL2,CSF2,CXCL12,IL1B,IL6,MMP19,MMP3,OSM,TNF
					IL-17A Signaling in Airway Cells	5.09	1	AKT1,CCL11,CCL20,CXCL6,IL6,MAPK11,MUC5B
					IL-6 Signaling	4.76	1.89	AKT1,CD14,IL1B,IL1R2,IL1RN,IL33,IL6,MAPK11,TNF
					TREM1 Signaling	4.74	1.89	AKT1,CCL2,CSF2,FCGR2B,IL1B,IL6,TNF
					Chemokine Signaling	4.5	2.449	CCL11,CCL2,CCL24,CCL4,CCR5,CXCL12,MAPK11
					Role of PKR in Interferon Induction and Antiviral Response	4.36	-0.707	HSP90B1,HSPA1A/HSPA1B,Hspa1b,HSPA5,HSPA8,IL1B,MAPK11,TNF
					Role of Pattern Recognition Receptors in Recognition of Bacteria and Viruses	4.32	2	C3,CLEC7A,CSF2,IL1B,IL33,IL6,OSM,TNF,TNFSF15
					Role of Osteoblasts, Osteoclasts and Chondrocytes in Rheumatoid Arthritis	4.31		AKT1,ALPL,CSF2,CTSK,IL1B,IL1R2,IL1RN,IL33,IL6,MMP3,TNF
					Graft-versus-Host Disease Signaling	4.25		IL1B,IL1RN,IL33,IL6,TNF
					Role of Macrophages, Fibroblasts and Endothelial Cells in Rheumatoid Arthritis	4.2		AKT1,CCL2,CEBPE,CSF2,CXCL12,IL1B,IL1R2,IL1RN,IL33,IL6,MMP3,OSM,TNF
					Dendritic Cell Maturation	4.04	1.89	AKT1,CSF2,FCGR2B,IL1B,IL1RN,IL33,IL6,MAPK11,TNF
					Erythropoietin Signaling Pathway	3.85	-2.333	AKT1,CSF2,CSF2RB,IL1B,IL33,IL6,OSM,TNF,TNFSF15
					Role of MAPK Signaling in Inhibiting the Pathogenesis of Influenza	3.72	2.449	CCL2,CXCL10,IL1B,IL6,MAPK11,TNF
					Toll-like Receptor Signaling	3.69	2	CD14,IL1B,IL1RN,IL33,MAPK11,TNF
					Xenobiotic Metabolism Signaling	3.58		ALDH1A3,FMO3,GSTA3,GSTA5,HSP90B1,IL1B,IL4I1,IL6,MAP3K6,MAPK11,TNF
					Hepatic Fibrosis / Hepatic Stellate Cell Activation	3.5		CCL2,CCR5,CD14,IL1B,IL1R2,IL6,MYH7,TIMP1,TNF
					Altered T Cell and B Cell Signaling in Rheumatoid Arthritis	3.46		CSF2,IL1B,IL1RN,IL33,IL6,TNF
					Role of Tissue Factor in Cancer	3.4		AKT1,CSF2,F10,F7,IL1B,MAPK11,PDIA6
					IL-17A Signaling in Fibroblasts	3.21		CCL2,IL6,LCN2,MAPK11
					Systemic Lupus Erythematosus In B Cell Signaling Pathway	3.16	1.265	AKT1,CSF2,FCGR2B,IL1B,IL33,IL6,LILRB4,OSM,TNF,TNFSF15
					Th17 Activation Pathway	3.03	1.342	CCL20,CSF2,HSP90B1,IL1B,IL6
					Aryl Hydrocarbon Receptor Signaling	2.95	1	ALDH1A3,GSTA3,GSTA5,HSP90B1,IL1B,IL6,TNF
					PPAR Signaling	2.87	-2.449	HSP90B1,IL1B,IL1R2,IL1RN,IL33,TNF
					Hepatic Fibrosis Signaling Pathway	2.85	1.732	AKT1,CCL2,IL1B,IL1R2,IL1RN,IL33,MAPK11,RND1,SOD2,TFRC,TIMP1,TNF
					Neuroinflammation Signaling Pathway	2.74	2.333	AKT1,CCL2,CXCL10,CXCL12,IL1B,IL6,MAPK11,MMP3,SOD2,TNF
					p38 MAPK Signaling	2.66	2.236	IL1B,IL1R2,IL1RN,IL33,MAPK11,TNF
					Role of MAPK Signaling in the Pathogenesis of Influenza	2.66		AKT1,CCL2,CXCL10,MAPK11,TNF
					HIF1α Signaling	2.61	-0.707	AKT1,HSPA1A/HSPA1B,Hspa1b,HSPA5,HSPA8,IL6,MMP19,MMP3
					Systemic Lupus Erythematosus Signaling	2.39		AKT1,FCGR2B,IL1B,IL1RN,IL33,IL6,TNF
					Natural Killer Cell Signaling	2.38	1.89	AKT1,HSPA1A/HSPA1B,Hspa1b,HSPA5,HSPA8,MAP3K6,MAPK11
					Iron homeostasis signaling pathway	2.32		ATP6V0D2,CP,GDF15,HPX,IL6,TFRC
					Cardiac Hypertrophy Signaling (Enhanced)	2.3	2.53	AKT1,CSF2,CSF2RB,CXCR1,IL1B,IL1R2,IL33,IL6,MAP3K6,MAPK11,OSM,TNF,TNFSF15
					Production of Nitric Oxide and Reactive Oxygen Species in Macrophages	2.28	-0.447	AKT1,ARG2,MAP3K6,MAPK11,PON1,RND1,TNF
					Antioxidant Action of Vitamin C	2.13		CSF2,CSF2RB,MAPK11,SLC23A3,TNF
					Adrenomedullin signaling pathway	2.07	0.816	AKT1,C3,IL1B,IL1RN,IL33,MAPK11,TNF
					eNOS Signaling	2.01	-2.236	AKT1,HSP90B1,HSPA1A/HSPA1B,Hspa1b,HSPA5,HSPA8
					Aldosterone Signaling in Epithelial Cells	2		DNAJA1,HSP90B1,HSPA1A/HSPA1B,HSPA5,HSPA8,HSPH1
					Cholecystokinin/Gastrin-mediated Signaling	1.94	2	IL1B,IL1RN,IL33,RND1,TNF
					NF-κB Signaling	1.8	1.633	AKT1,IL1B,IL1R2,IL1RN,IL33,TNF
					Xenobiotic Metabolism General Signaling Pathway	1.74	-0.447	AKT1,GSTA3,GSTA5,MAP3K6,MAPK11
					PI3K/AKT Signaling	1.67		AKT1,CSF2RB,CXCR1,GDF15,HSP90B1,IL1R2
					STAT3 Pathway	1.63		CSF2RB,CXCR1,IL1B,IL1R2,MAPK11
					Sirtuin Signaling Pathway	1.39	-0.816	ABCA1,AKT1,ARG2,ARNTL,HMGCS2,SOD2,TNF
					Xenobiotic Metabolism CAR Signaling Pathway	1.37	-0.447	ALDH1A3,FMO3,GSTA3,GSTA5,HSP90B1
					Xenobiotic Metabolism PXR Signaling Pathway	1.35	-0.447	ALDH1A3,GSTA3,GSTA5,HSP90B1,IL4I1

## Sheet: h. NRCWE-064
Table S9. Perturbed IPA canonical pathways for NRCWE-061, NRCWE-062, NRCWE-063, and NRCWE-064 after 1 day of exposure.
Table S9h. Perturbed IPA canonical pathways for NRCWE-064 at 54 µg/mouse. Pathways were considered significantly perturbed if the −log (p-value) was ≥ 1.3 .
Ingenuity Canonical Pathways	−log(p-value)	z-score	Molecules
Agranulocyte Adhesion and Diapedesis	17		CCL17,Ccl2,CCL2,CCL20,CCL24,CCL3L3,CCL4,Ccl7,Ccl8,Ccl9,CXCL10,CXCL12,CXCL2,Cxcl3,CXCL6,CXCR1,CXCR2,IL1RN,IL33,MMP19,MMP3,MYH7
Granulocyte Adhesion and Diapedesis	16.9		CCL17,Ccl2,CCL2,CCL20,CCL24,CCL3L3,CCL4,Ccl7,Ccl8,Ccl9,CXCL10,CXCL12,CXCL2,Cxcl3,CXCL6,CXCR2,IL1R2,IL1RN,IL33,MMP19,MMP3
Acute Phase Response Signaling	9.25	3.162	C3,CFB,CP,HMOX1,HPX,IL1RN,IL33,IL6,ITIH4,OSM,SAA1,Saa3,SERPINA3,SERPIND1,SOD2
LXR/RXR Activation	8.56	0	ARG2,C3,CCL2,CD14,HPX,IL1R2,IL1RN,IL33,IL6,ITIH4,KNG1,SAA1
Communication between Innate and Adaptive Immune Cells	7.34		CCL3L3,CCL4,Ccl9,CSF2,CXCL10,IL1RN,IL33,IL6,TLR2
Airway Inflammation in Asthma	6.28		CCL2,CCL20,CSF2,IL33,OSM,RNASE2
IL-17 Signaling	5.95	3.317	CCL17,CCL2,CCL20,CSF2,IL33,IL6,LCN2,MMP3,MUC5B,OSM,TNFSF15
LPS/IL-1 Mediated Inhibition of RXR Function	5.54		ACSL4,ALDH1A3,CD14,FABP1,FABP5,FMO3,HMGCS2,IL1R2,IL1RN,IL33,IL4I1,SLCO1A2
Role of IL-17F in Allergic Inflammatory Airway Diseases	5.45	2.236	CCL2,CCL4,CSF2,CXCL10,CXCL6,IL6
IL-10 Signaling	5.04		ARG2,CD14,HMOX1,IL1R2,IL1RN,IL33,IL6
Airway Pathology in Chronic Obstructive Pulmonary Disease	4.72		CCL2,CCL20,CSF2,IL33,IL6,LCN2,OSM,TNFSF15
Tumor Microenvironment Pathway	4.69	3.162	ARG1,CCL2,CSF2,CXCL12,IL6,MMP19,MMP3,OSM,PLAU,SPP1
Hepatic Cholestasis	4.62		CD14,CSF2,CYP7B1,IL1R2,IL1RN,IL33,IL6,OSM,SLCO1A2,TNFSF15
Coagulation System	4.4	0.447	F10,F7,KNG1,PLAU,SERPIND1
FXR/RXR Activation	4.4		C3,FETUB,HPX,IL1RN,IL33,ITIH4,KNG1,SAA1
Role of Hypercytokinemia/hyperchemokinemia in the Pathogenesis of Influenza	4.05	2.449	CCL2,CCL4,CXCL10,IL1RN,IL33,IL6
Role of Pattern Recognition Receptors in Recognition of Bacteria and Viruses	3.77		C3,CLEC7A,CSF2,IL33,IL6,OSM,TLR2,TNFSF15
Altered T Cell and B Cell Signaling in Rheumatoid Arthritis	3.64		CSF2,IL1RN,IL33,IL6,SPP1,TLR2
Role of Osteoblasts, Osteoclasts and Chondrocytes in Rheumatoid Arthritis	3.23		ALPL,CSF2,CTSK,IL1R2,IL1RN,IL33,IL6,MMP3,SPP1
Iron homeostasis signaling pathway	3.21		ATP6V0D2,CP,GDF15,HMOX1,HPX,IL6,TFRC
Atherosclerosis Signaling	2.79		CCL2,CXCL12,IL1RN,IL33,IL6,MMP3
VDR/RXR Activation	2.76		CD14,CSF2,CXCL10,KLF4,SPP1
Role of Macrophages, Fibroblasts and Endothelial Cells in Rheumatoid Arthritis	2.74		CCL2,CSF2,CXCL12,IL1R2,IL1RN,IL33,IL6,MMP3,OSM,TLR2
Glucocorticoid Receptor Signaling	2.59		ARG2,CCL2,CSF2,CXCR1,CXCR2,HSPA5,IL1R2,IL1RN,IL6,MMP3,PLAU,TLR2
Hepatic Fibrosis / Hepatic Stellate Cell Activation	2.41		CCL2,CCN2,CD14,IL1R2,IL6,MYH7,TIMP1
HMGB1 Signaling	2.15	2	CCL2,CSF2,IL33,IL6,OSM,TNFSF15
Role of Tissue Factor in Cancer	2.09		CCN2,CSF2,F10,F7,PDIA6
Neuroinflammation Signaling Pathway	1.93	2.828	CCL2,CXCL10,CXCL12,HMOX1,IL6,MMP3,SOD2,TLR2
IL-6 Signaling	1.92	2	CD14,IL1R2,IL1RN,IL33,IL6
Hepatic Fibrosis Signaling Pathway	1.71	1.667	CCL2,CCN2,IL1R2,IL1RN,IL33,SOD2,SPP1,TFRC,TIMP1
HIF1α Signaling	1.66	1.633	HK3,HMOX1,HSPA5,IL6,MMP19,MMP3
Osteoarthritis Pathway	1.58	2.449	ALPL,CXCR2,IL1R2,MMP3,SPP1,TLR2
Dendritic Cell Maturation	1.56	2.236	CSF2,IL1RN,IL33,IL6,TLR2
Erythropoietin Signaling Pathway	1.47	-2.236	CSF2,IL33,IL6,OSM,TNFSF15
