# Supplementary material for: Single-Walled vs. Multi-Walled Carbon Nanotubes: Influence of Physico-Chemical Properties on Toxicogenomics Responses in Mouse Lungs
Source: Nanomaterials (Basel). 2023 Mar 15;13(6):1059. doi: 10.3390/nano13061059 (PMC10057402; doi:10.3390/nano13061059)
Supplement: Supplementary file 1 [file nanomaterials-13-01059-s001.zip › Table S10.xlsx]

## Sheet: Table S10
Table S10. WCNA Dynamic modules.
Module 1	Module 2	Module 3	Module 4	Module 5	Module 6	Module 7	Module 8	Module 9	Module 10	Module 11	Module 14	Module 13	Module 14	Module 15	Module 16	Module 17	Module 18	Module 19	Module 20	Module 21	Module 22	Module 23
2510009E07Rik	1110038F14Rik	1110004F10Rik	1700001C19Rik	1700017B05Rik	2210407C18Rik	0610009B22Rik	1700028P14Rik	Abhd12	0610040J01Rik	Aars	Acsl1	Aaas	Abcg3	1600014C10Rik	Acbd3	2310050C09Rik	Aim2	1700037H04Rik	Actr3	Abcc6	Alas1	1300017J02Rik
6430548M08Rik	1700030K09Rik	1110008P14Rik	1700018F24Rik	1810055G02Rik	2610524H06Rik	2310039H08Rik	1700088E04Rik	Acp2	Adamts4	Abcc1	Actn2	Abca1	Aplnr	Acp5	Acot7	Acer1	Akna	2310022A10Rik	Adar	Adra2a	Ankrd12	Agxt
Aard	1700123K08Rik	1700123O20Rik	1700029H14Rik	2810004N23Rik	3110040N11Rik	3830406C13Rik	2310030G06Rik	AI413582	Akr1b8	Adam9	Acvr1c	Abcb1b	B3gnt5	Adam17	Acsl4	Acsbg1	Apbb1ip	Acaa2	Adora2a	Agr2	Arntl	Ahsg
Aatk	2410002F23Rik	2310011J03Rik	4921536K21Rik	Aatf	Adam5	A430005L14Rik	2610301B20Rik	Aig1	Aldh18a1	Adm	Adipoq	Abcd4	Bcl11a	Adam8	Adam10	Acta1	Arap1	Acacb	Aida	Aicda	Atp2b2	Akr1c6
Abca8a	2510039O18Rik	2410004B18Rik	9530002B09Rik	Abce1	Adamts7	Abhd6	2610528J11Rik	Alpk2	Aldh1a3	Angptl4	Alpk3	Abhd4	Bcl11b	Agtrap	Adss	Actn3	Arhgap4	Acadl	Akap12	Alox12e	Cables1	Alb
Abca8b	2700097O09Rik	4930453N24Rik	Aadac	Abcf1	Ak5	Acad9	4931406C07Rik	Anxa4	Alpl	Arrdc4	Amy1	Acad8	Blk	Aif1	Ahsa1	Ada	Arhgap9	Acadm	Ankfy1	Alox15	Camkk1	Aldob
Abcb1a	4833420G17Rik	9130401M01Rik	Abcb11	Abcf2	Alg13	Acsf3	9530068E07Rik	Ap2s1	Anxa1	Atp1b3	Ank1	Aen	Camk4	Alox5ap	Aif1l	Adssl1	Arhgdib	Acads	Apod	Atp6v1b1	Cbr2	Ambp
Abcb9	4932438A13Rik	Aarsd1	Abcb4	Actn1	Ammecr1	Acyp1	Abcc9	Ap3s1	Aox3	B4galt1	Aoc3	Ahi1	Ccl5	Aoah	Alg12	Aldoa	Arrb2	Acadvl	Azi2	Bcat1	Cpeb1	Apoa1
Abhd14b	6030458C11Rik	Abcb8	Acan	Afg3l1	Anln	Adh5	Abhd3	Apobec1	Arg2	Bcl10	Apobec2	Ak1	Ccr6	Apobec3	Alkbh5	Aloxe3	B3gnt8	Acat1	B2m	Ccl1	Cry2	Apoa2
Abi3bp	9430015G10Rik	Abhd10	Acot12	Afp	Ap1s1	Amz2	Ace2	Apoe	Arhgap8	Bcl3	Aqp3	Akap1	Ccr7	Apoc2	Anp32e	Ankrd22	Blnk	Aco2	Batf2	Ccl11	Dbp	Apoa5
Ablim1	Aak1	Abhd5	Acsl6	Ahcy	Aplf	Anapc11	Acox2	Aprt	Arid5a	Birc3	Art1	Aldh4a1	Ccr9	Aqp9	Atp11a	Anxa9	Btk	Acss2	Bst2	Ccl24	Dgkg	Apoc3
Abtb1	Abca2	Abi1	Acsm2	Akt2	Asf1b	Anapc13	Acss1	Arnt2	Arsi	Btg1	Art3	Angel1	Cd180	Arpc3	Atp6v0a2	Asb5	Casp1	Agl	Ccrl2	Ccr3	Fam76a	Apoc4
Acadsb	Abca7	Acbd6	Actl6b	Ap1g1	Asgr2	Ap4s1	Adam28	Arsg	Atf3	Casp4	Art5	Apaf1	Cd19	Arpc5	Azin1	Asprv1	Ccr2	Akr7a5	Cd274	Cd209d	Fhdc1	Apof
Acer2	Abcc10	Acot8	Adam11	Ap2m1	Aspm	Apip	Adamdec1	Atp6ap2	Batf	Ccl20	Asb10	Apba2	Cd2	Atp10a	Banf1	Atp2a1	Cd48	Amacr	Cd40	Cd209e	Gpr155	Apoh
Acox1	Abcc5	Acot9	Adam12	Apex1	Atpaf2	Atg10	Agbl3	Atp6v0c	Bcan	Cd302	Asb11	Arsa	Cd22	B4galnt1	Baz1b	Cacna1s	Cd52	Ank	Cd47	Cdh17	Gzmm	Apom
Acvr2a	Abcf3	Acsl5	Adam1b	Arcn1	AU040320	Atox1	Agr3	Atp6v0d1	Bdkrb1	Cd82	Asph	Atmin	Cd247	Batf3	Bpnt1	Cacnb1	Cd72	Atp5a1	Cmpk2	Chad	Hdac11	Bhmt
Acvr2b	Abl1	Actl6a	Adam23	Arf2	Aurka	Atp5c1	Aldh3b1	Atp6v0e	Bex2	Cd83	Atp2a2	Atp6v1a	Cd27	Bcl2l14	C1galt1	Cacng1	Cd74	Atp5b	Crlf2	Corin	Herpud1	Cps1
Acvrl1	Acaa1a	Actr10	Adam26a	Arf6	Aurkb	Atp5e	Ankrd6	Atp6v1b2	Bhlhe40	Cebpb	B3galt2	Baiap2	Cd28	Bid	Cacybp	Calm4	Cmtm7	Atp5d	Daxx	Creb3l4	Hlf	Cyp2a12
Adarb1	Acin1	Actr1b	Adam7	Armc6	B4galt5	Atp5g1	Anxa8	Atp6v1c1	C3	Cflar	Bdh1	Bax	Cd37	Bin3	Calr	Calml3	Coro1a	Bscl2	Ddx60	Derl3	Klf15	Cyp2c29
Adcy4	Acp6	Acy1	Adcyap1	Asns	Bak1	Atp5g3	Arhgdig	Atp6v1d	C5ar1	Cish	Bves	Bbc3	Cd3d	Bmp2k	Canx	Capn3	Csf1r	Bzw2	Dhx58	Dio1	Lefty1	Cyp2c70
Adcy8	Acrbp	Adat2	Add2	Atad3a	Bard1	Atp5h	Arl6ip1	B4galt6	Calca	Clic4	Cap2	Bcl2l1	Cd3e	Bst1	Cdc27	Car12	Cx3cr1	Cd248	Ehd1	Duoxa1	Lpar3	Cyp2d10
Adcy9	Acvr1b	Adprh	Aire	Atf4	Bcap29	Atp5j	Ascc1	Bcap31	Car13	Clint1	Car3	Cby1	Cd3g	Capg	Cdk2ap2	Cartpt	Dapp1	Cfl2	Eif2ak2	Eaf2	Mapk12	Cyp2d26
Add1	Adam1a	Adrm1	Akap3	B4galt2	Bcl2l15	Atp5j2	Aspa	Blvra	Ccdc86	Col4a1	Casq2	Ccng1	Cd5	Casp8	Chordc1	Casp14	Dennd4b	Clybl	Enpp4	En2	Mnt	Cyp3a11
Add3	Adam22	Adsl	Akap4	Bcl7c	Bgn	Atp5k	Atp2c2	C1qa	Ccl12	Col4a2	Cav3	Cd34	Cd6	Cd300a	Cpsf2	Casq1	Dnase1l3	Coq6	G3bp2	Ern2	Mpv17l	Cyp4f14
Adk	Adam33	Afg3l2	Akr1c21	Bop1	Birc5	Atp6v1f	Atp6v1c2	C1qc	Ccl17	Csf1	Cfd	Cd9	Cd7	Cd33	Creld2	Cdsn	Dok3	Coq9	Gbp2	Fcgbp	Ngef	F2
Adrb1	Adam4	Agfg1	Akr1d1	Bysl	Blm	Atpif1	B3gnt4	C3ar1	Ccl2	Cxcl10	Cidea	Cdc23	Cd79b	Cd53	Csnk2a1	Chrna1	Ebi3	Cpt2	Gbp3	Foxa3	Npas2	Fgb
Adrb2	Adamts10	Agpat5	Alk	Bzw1	Bok	Aurkaip1	B9d1	Cblc	Ccl22	Cxcl9	Cidec	Cdkn1a	Cd8a	Cdc42se1	Cxcl12	Crct1	Epsti1	Crat	Gbp6	Gcnt3	Npy1r	G6pc
Adrb3	Adat1	Ahcyl1	Alox8	C1qbp	Brca1	BC004004	Bbox1	Ccl6	Ccl3	Ddx54	Ckm	Cog4	Cd8b1	Ceacam10	Cyb5b	Crisp1	Evi2a	Cs	H2-K1	Gsto1	Nr1d1	Gc
Aff2	Adcy6	Aifm1	Ambn	Cars	Brca2	Cbr4	Bbs9	Ccl8	Ccl4	Dennd2d	Ckmt2	Cox6b2	Cd96	Celsr3	Ddost	Cst6	Fermt3	Cyc1	H2-M3	Guca2a	Nr1d2	Hpd
Agap1	Aebp2	Aip	Ankrd36	Ccdc6	Bub1	Ccdc90b	Bmpr1b	Ccr1	Ccl7	Dnajc2	Clstn3	Csnk1g1	Chst10	Cfp	Dnajb11	Defb1	Fes	Cycs	H2-Q10	Il13	Per2	Igfbp1
Aggf1	Aff1	Aldh9a1	Anxa10	Ccdc93	Bub1b	Cd59a	Bola1	Cd177	Cd14	Dusp16	Cmya5	Ctnnb1	Ciita	Cklf	Dnajb9	Defb6	Fgd2	Decr1	H2-T24	Il13ra2	Per3	Lect2
Ahnak	Aff4	Alg14	Ap3b2	Cct3	C1qtnf6	Cdk2ap1	Bphl	Cd200r1	Cd44	Egr1	Coro6	Dcxr	Clec2i	Copz1	Dnajc3	Dkkl1	Fgd3	Dlat	Hap1	Il1rl1	Por	Mbl2
Ahr	Afm	Alg3	Apon	Cct8	Cacnb3	Cetn3	Bspry	Cd68	Cd80	Eif3c	Cox6a2	Ddit4l	Cmah	Coro1b	Edem1	Dmkn	Fgr	Ech1	Icosl	Il4	Rab17	Mug1
AI597479	Aftph	Alg5	Arntl2	Cd2bp2	Capn6	Chchd1	Cab39l	Cd84	Celsr1	Eif3d	Cox7a1	Dnajc24	Cnp	Cotl1	Elavl1	Dsc1	Fmnl1	Echs1	Ido1	Il5	Rab3a	Pah
Ak3	Agap3	Alg9	Arx	Cdc25a	Car6	Chchd3	Calcoco2	Cd86	Clec4d	Eif5	Cox8b	Dzip1	Cnr2	Csf2ra	Exosc9	Dsc2	Fyb	Ecsit	Ifi204	Kcne3	Rac3	Plg
Akirin2	Agfg2	Als2	Asb15	Cdv3	Car9	Churc1	Calml4	Chl1	Clec4e	Fas	Cpxm2	Ecm1	Cr2	Csf2rb	Far1	Dsc3	Gga2	Ehhadh	Ifi35	Klk4	Rap1gap	Pzp
Akt3	Ahctf1	Ankib1	Asb4	Cenpt	Casp3	Cisd1	Car8	Chrdl1	Clip4	Fgl2	Crhr2	Ei24	Crtam	Csf2rb2	Fkbp2	Dusp13	Gmip	Etfa	Ifi44	Lipc	Rasd2	Rdh7
Alcam	Akap10	Ankrd49	Ascl3	Ckap4	Ccdc22	Cnbp	Cbr1	Chrna7	Cp	Flnb	Csrp3	Epha4	Csk	Cstb	Foxk2	Egln3	Gpr65	Etfdh	Ifi47	Ltf	Rev1	Serpina3k
Aldh1a1	Akap7	Ano10	Astn1	Col18a1	Ccdc34	Cnpy2	Cbx6	Cideb	Csf2	Fos	Cyp2e1	Ephx1	Cst7	Ctsc	Gfpt1	Elovl4	Gpsm3	Fah	Ifih1	Mcpt1	Rgs2	Serpinc1
Aldh2	Akap8	Anp32b	Atcay	Coro1c	Ccdc80	Coasy	Ccdc65	Clec4n	Csf3	Fpr2	Dcn	Ercc5	Ctsw	Ctsh	Gtf3c6	Elovl7	Grb2	Fem1a	Ifit1	Mcpt2	Rnf43	Serpinf2
Aldh3a2	Akap8l	Anxa2	Atf7ip2	Cox18	Cck	Cox4i1	Ccdc96	Clec5a	Ctps	Furin	Des	Exoc4	Cxcr3	Ctsz	Hnrnpc	Evpl	H2-Aa	Fh1	Ifit2	Moxd1	Slc23a2	Slc27a5
Aldh6a1	Akap9	Anxa3	Atp12a	Creb3l1	Ccna1	Cox5a	Cckar	Cln3	Cxcl1	Gadd45b	Dgat2	F8a	Cxcr4	Cyba	Hnrnpf	Fabp6	H2-Ab1	Got2	Ifit3	Msx3	Slc46a3	Slco1b2
Amigo1	Als2cl	Ap1m2	Atp1a3	Csl	Ccna2	Cox6a1	Cd164	Cln8	Cxcl13	Gadd45g	Dmpk	Fam114a2	Cxcr5	Cybb	Hsp90ab1	Fam83g	H2-DMa	Gpc1	Ifitm3	Muc5ac	Sord	Spp2
Amotl2	Ambra1	Ap3m1	Atp4a	Cstf1	Ccnb1	Cox6b1	Cd24a	Clta	Cxcl16	Gclc	Doc2g	Fbxw9	Cxcr6	Dok2	Hsp90b1	Fetub	H2-Eb1	Gpi1	Ifng	Muc5b	Spon2	Ttr
Anapc1	Ammecr1l	Apool	Atp5g2	Cstf2	Ccnb2	Cox6c	Cd55	Cndp2	Cxcl2	Gem	Ebf2	Frmd8	Cyfip2	Emp3	Hspa5	Gpr87	Hcls1	Gstm5	Igtp	Oit1	Tef	Ugt2b1
Ang	Anapc2	Aqr	Atp8b3	Cttn	Ccne1	Cox7a2	Cdc26	Comtd1	Cxcl5	Gna13	Eef1a2	Fuca1	Cytip	Fcer1g	Hspd1	Hoxc4	Helb	Gys1	Iigp1	Oosp1	Tex11
Angpt1	Anapc4	Arf4	Avpr1b	Cyp51	Ccne2	Cox8a	Cep164	Cpxm1	Cyp7b1	Gnl2	Egf	Gas6	Dock2	Fcgr1	Hspe1	Hoxc6	Hps1	Hadha	Il15	Reg3g	Tspan4
Ankra2	Anapc5	Arfgap2	B3gat1	Dcakd	Ccnf	Crip1	Cep290	Creg1	D10Wsu102e	Gramd3	Elovl6	Gde1	Dock8	Fcgr3	Hyou1	Hrnr	Hvcn1	Hadhb	Il18bp	Scgb3a1	Usp2
Ankrd13a	Angel2	Arl1	B4galnt2	Ddx10	Cd109	Crot	Cetn2	Csmd1	Efhd2	Hck	Eno3	Gdf15	Dtx1	Fcgr4	Ibtk	Hsd17b2	Icos	Hibadh	Irf1	Scin	Vpreb3
Ankrd33b	Ankhd1	Arl2	BC016579	Ddx18	Cd276	Cryl1	Chchd6	Cst8	Egr2	Hif1a	Entpd2	Gdpd1	Eomes	Fxyd5	Ilf2	Il1f5	Il12rb1	Hibch	Irf7	Slc38a1	Wee1
Ankrd40	Ankrd10	Arl6	BC024139	Ddx21	Cd320	Cryz	Chgb	Ctla4	Ehf	Hk2	Ephx2	Gdpd5	Evl	G6pdx	Isyna1	Il1f6	Il21r	Hsdl2	Irf9	Sox9	Zfp346
Ankrd44	Ankrd17	Arl8b	Bhlhe22	Ddx27	Cdc20	Csrp2	Cldn8	Ctnnbip1	Elf3	Hp	Fabp3	Gne	Exoc6	Gcnt1	Khdrbs3	Il1f8	Il7r	Hspb8	Irgm1	Spdef	Zfp467
Anks1	Ankrd24	Armc10	Bmp10	Derl1	Cdc25b	Cuedc2	Clmn	Ctsa	Enc1	Icam1	Fabp4	Golga7	Fasl	Glipr1	Kpna3	Klk11	Irf5	Idh3a	Isg20	Syn1
Ano1	Ankrd26	Arpc4	Bmp8b	Dimt1	Cdc25c	D8Ertd738e	Cmbl	Ctsb	F10	Ier2	Fgf12	Golph3l	Fcer2a	Gnptab	Kras	Krt10	Irf8	Idh3b	Jak1	Tff2
Anp32a	Anks3	Arpp19	Brs3	Dio2	Cdc6	Dbi	Cnot8	Ctsd	Ffar2	Ifitm1	Fhl2	Grip1	Fcho1	Grina	Lamc2	Krt13	Kcnab2	Idh3g	Lgals3bp
Antxr1	Ankzf1	Asah1	Bsn	Dis3	Cdc7	Dctn3	Cops7b	Ctsk	Fgg	Ifnar2	Flnc	Homer3	Fcrl1	Htr7	Lasp1	Krt14	Lag3	Immp2l	Lgals9
Antxr2	Ap3d1	Asb8	Bsnd	Dnajc5	Cdca3	Ddt	Cryaa	Ctsl	Fosl1	Ifrd1	Fndc1	Hsd17b11	Fcrla	Id2	Lsm7	Krt15	Lat2	L2hgdh	Ly6a
Anxa5	Ap3m2	Ash2l	Btbd17	Donson	Cdca5	Dgcr6	Cstf2t	Cyp4f16	Fosl2	Igf2bp2	Frmd5	Ier5	Gfi1	Ifi30	Magt1	Krt32	Lsp1	Lynx1	Mitd1
Aox1	Appl2	Asl	Btn1a1	Dph2	Cdca7	Dnajc15	Ctf1	Cysltr1	Fut4	Il1b	Fxyd1	Ier5l	Gimap1	Igsf6	Map3k7	Krt4	Lst1	Map1lc3a	Morc3
Ap1s2	Araf	Asnsd1	C1ql1	Dph5	Cdca7l	Dnajc4	Cyp2s1	Dab2	Gch1	Il1f9	Got1	Igf2r	Gimap4	Igsf8	Morf4l2	Krt5	Ly9	Matn2	Mov10
Ap3s2	Arf3	Atf6b	C1ql3	Ebna1bp2	Cdk4	Dnajc9	Cyp4f15	Daglb	Gda	Il4ra	Gpd1	Itgb4	Gimap7	Ikbke	Mrps28	Krt6b	Lyl1	Mdh1	Ms4a6b
Apbb1	Arfgef1	Atg3	C8a	Eef1e1	Cdkn2a	Dnase1l1	Dalrd3	Dclk1	Gfpt2	Jak2	Hamp	Kif1c	Gpr132	Il10rb	Msh6	Krtdap	Mical1	Mdh2	Mx1
Apbb2	Arfip2	Atg7	C8b	Eftud2	Cdt1	Dolk	Dbndd1	Ddhd1	Ggct	Junb	Hhatl	Klhl22	Grap2	Il12b	Mtmr4	Lce1a1	Myo1g	Mfn2	Nampt
Apc	Arfrp1	Atl2	C9	Eif1a	Cenpa	Dpy30	Ddo	Dhcr7	Gpr35	Katna1	Hrc	Klhl26	Grk6	Il2ra	Mtpn	Lce1a2	Ncf4	Mlycd	Nmi
Aplp2	Arhgap17	Atp6ap1	Cabyr	Eif2s1	Cenpe	Dynlrb1	Decr2	Dpp7	Gpr84	Lcp2	Hspb3	Krt33a	Gzma	Itgam	Ncbp2	Lce1b	Nckap1l	Mrps15	Nt5c3
App	Arhgef1	Atp6v1e1	Cacna1h	Eif2s2	Cenpf	E2f6	Degs2	Enpp1	Gsr	Litaf	Hspb7	Leprot	Gzmb	Kcnn4	Nfxl1	Lce1d	Parvg	Ndufa10	Nudt7
Appbp2	Arhgef5	Atp6v1h	Cacnb4	Eif3b	Cenph	Ebp	Dexi	Eps8	Has1	Mapkapk2	Igdcc4	Lmbr1	H2-Oa	Klhdc4	Nipa2	Lce1f	Pde1b	Ndufa9	Oas2
Appl1	Arhgef7	Atxn10	Cacng2	Eif4a1	Cenpk	Echdc1	Dlg3	Erp29	Hbegf	Marcks	Itgb1bp2	Lpar2	Haao	Lamp2	Nmt2	Lce1g	Pik3cd	Ndufaf1	Oas3
Aptx	Arid3b	Aup1	Cacng5	Eif5a	Cenpm	Eid1	Dmrt2	F7	Hivep3	Marcksl1	Jam3	Lrpap1	Hcst	Lcp1	Nucks1	Lce1i	Pik3cg	Ndufs1	Oasl1
Aqp1	Arih1	B3galt4	Cacng8	Eif6	Cenpn	Etfb	Dnaja4	Fabp1	Hmox1	Mbd1	Kcna1	Ltc4s	Ikzf1	Lgals3	Pdia3	Lce1l	Pip4k2a	Ndufs2	Oasl2
Ar	Arih2	B3galt6	Cadps	Elac2	Cenpq	Fahd1	Dnajb13	Fabp5	Hpx	Mefv	Kcnd2	Map4k4	Il10ra	Ltb4r1	Pdia4	Lce3c	Plcg2	Ndufs3	Ogfr
Arap2	Arl16	Bad	Calb1	Ell2	Cep55	Fam162a	Dpp6	Fabp7	Ier3	Mmp9	Kcnj12	Mboat2	Il16	Ly6i	Pdia6	Lgals7	Plcl2	Ndufs7	Parp12
Arap3	Arl8a	Bag4	Calb2	Emilin1	Cgref1	Fars2	Dsg2	Fam20c	Ifngr2	Mt1	Kcnj3	Mdm2	Il27ra	Ly96	Pdpn	Lor	Pld4	Ndufs8	Parp14
Arhgap12	Armc5	BC031181	Calcr	Eprs	Chaf1b	Fbxo25	Dusp14	Fcamr	Il17ra	Mt2	Kcnj5	Mgmt	Il2rb	Lyst	Piga	Ly6g6c	Pstpip1	Ndufv1	Parp9
Arhgap21	Arnt	Bccip	Caln1	Ercc8	Chek1	Fkbp3	Dusp18	Fcrls	Il18rap	Mtmr14	Ldb3	Mr1	Il2rg	Mat1a	Pold3	Lypd3	Ptk2b	Ndufv3	Plac8
Arhgap24	Arrdc1	Bckdk	Camk1g	Ergic1	Chek2	Fkbp7	Dusp19	Fgl1	Il1a	Mvp	Lgr6	Mybl1	Irf4	Matk	Pole3	Mt4	Ptpn18	Nudt8	Plscr1
Arhgap29	Arvcf	Bcs1l	Camkv	Etf1	Chpf	Fundc1	Dyrk3	Folr2	Il1r2	Mxd1	Lmod2	Nacc2	Itga4	Metrnl	Ppp6c	Mybph	Ptpn6	Oxnad1	Pml
Arhgap5	Asb13	Becn1	Capn12	Exosc10	Chrnb4	Ggh	Ebpl	Foxp3	Il1rn	N4bp1	Lrrc2	Nbr1	Itgal	Mpeg1	Prpf40a	Myf6	Ptpro	Pcca	Psmb10
Arhgap6	Asb6	Bet1	Capn8	Ext1	Chtf18	Glo1	Echdc3	Frk	Il33	Nadk	Lum	Ncaph	Itgb7	Ms4a6c	Psme4	Myh1	Rac2	Pdha1	Psmb8
Arhgef10	Ash1l	Bet1l	Car10	F3	Cit	Glod4	Efcab2	Fuca2	Il34	Ndrg1	Macrod1	Nek3	Itk	Ms4a6d	Psmg3	Myh2	Rasa3	Pgm2	Psmb9
Arhgef12	Atad1	Blmh	Car5a	Fads3	Ckap2	Glrx2	Elf5	Galc	Il6	Nfkb1	Mapk10	Nosip	Kif21b	Myo1f	Rbm14	Myh4	Rasgrp4	Pkia	Psme1
Arhgef18	Atad2b	Blvrb	Card14	Fam98a	Ckb	Glud1	Elof1	Galk2	Inhba	Nfkbia	Mb	Npepps	Klra7	Naip2	Rbm8a	Myh8	Rgs14	Pmm1	Ripk3
Arhgef2	Ate1	Blzf1	Cbln1	Farsa	Cks1b	Gng10	Emb	Galm	Itga7	Nfkbib	Mlxipl	Nudt16	Klrb1f	Ncf1	Rcc2	Mylk2	Rhog	Poldip2	Rnf114
Arhgef3	Atf2	Bnip1	Cbln3	Farsb	Cks2	Gnpat	Enox2	Galnt6	Itih4	Nfkbiz	Mrap	P2rx7	Klrd1	Ncf2	Rfk	Mylpf	Runx3	Ppif	Rsad2
Arid1a	Atg16l1	Brcc3	Cckbr	Fastkd5	Clcn5	Gpt2	Entpd5	Gas7	Lcn2	Nupr1	Mybpc3	Pcyox1	Klrg1	Necap2	Rngtt	Myog	Sash3	Retsat	Rtp4
Arid2	Atg2a	Brms1	Ccnb3	Fbl	Cldn4	Gpx4	Espn	Gatm	Lox	Odc1	Myh6	Pdrg1	Klrk1	Nfam1	Rock1	Myot	Scly	Rhot2	Samhd1
Arid4b	Atg2b	Btf3	Cd70	Fbxl15	Clec11a	Gpx8	Fam110a	Gba	Lrg1	Osmr	Myl1	Pgpep1	Kmo	Olr1	Rpn1	Myoz1	Selplg	Rilpl1	Shisa5
Arl2bp	Atm	Btf3l4	Cdh23	Fbxo15	Cmas	Grcc10	Fam161a	Gla	Maff	Parp8	Myl3	Phlda3	Lat	P2ry6	Rpn2	Myoz3	Sema4a	Sdha	Slfn3
Arl6ip6	Atp11b	Bub3	Cdh8	Fbxo4	Cntrob	Grhpr	Fam81a	Glb1	Map3k14	Pde4b	Myl4	Pld1	Lck	Panx1	Scamp1	Neu2	Sema4d	Sdhb	Socs1
Armcx1	Atp11c	Bud31	Ceacam2	Fbxo42	Col16a1	Guk1	Fank1	Gm2a	Mapk13	Pfkfb3	Myl7	Pm20d1	Lef1	Pdcd1lg2	Scoc	Nmu	Sh3bp2	Slc20a2	Sp100
Armcx5	Atp13a1	C1d	Cend1	Fndc4	Col1a1	Hagh	Fbxo16	Gna15	Mcoln2	Pgs1	Myom1	Polk	Limd2	Pgd	Sdf2l1	Ovol1	Shkbp1	Slc25a19	Sp110
Arrb1	Atp6v0a1	C1galt1c1	Cer1	Fstl3	Col1a2	Hddc2	Fbxo36	Gnpda1	Mlph	Phc2	Myom2	Pomt2	Lrmp	Pik3ap1	Sec61b	Pax9	Slc25a45	Slc25a20	Srgn
Art4	Atp6v1g2	Calu	Chodl	Ftsj3	Col3a1	Higd2a	Fhit	Gns	Mmp3	Picalm	Myoz2	Ppp2r5d	Lta	Pilra	Sel1l	Perp	Slc35c2	Slc25a26	Stat1
Asb3	Atp9b	Camk1	Chrm4	G3bp1	Col5a1	Hint1	Fkbp4	Golm1	Mmp8	Pim2	Ndrg2	Pqlc3	Ltb	Pilrb1	Serpinb9	Pitx1	Smap2	Slc25a3	Stat2
Asxl1	Atr	Cant1	Chrna2	Gapdh	Col5a2	Hint2	Foxa1	Gp2	Mpp6	Pim3	Ndrg4	Prnp	Ly6d	Pla2g7	Serpinh1	Pkp1	Spic	Slc25a4	Tap1
Atf7	Atxn7	Capns1	Chrna3	Gar1	Col5a3	Hint3	Foxa2	Gpnmb	Mthfd2	Plat	Nppa	Pros1	Map3k1	Pnpla7	Set	Pla2g2f	Stk10	Slc41a3	Tap2
Atg12	B3galnt2	Caprin1	Chrna4	Gfer	Col6a1	Hmgn1	Foxj1	Gpr137b	Muc1	Plaur	Nrap	Prps2	Map4k1	Prdx5	Sf3a3	Plcd1	Tbc1d14	Stard10	Tapbp
Atp13a2	B4galt3	Capza1	Chrna5	Gja1	Col6a2	Hmgn3	Foxn4	Gpr34	Muc4	Plekha4	Nrg4	Rab40c	Mef2c	Prkcd	Sfpq	Prom2	Tec	Sucla2	Tapbpl
Atp2a3	Bap1	Capza2	Chrnb2	Gjb3	Col8a1	Hsbp1	Fsip1	Gria1	Mvd	Plekho2	Pacsin3	Rap2b	Ms4a1	Pstpip2	Slc35a2	Psapl1	Tgfb1	Suclg1	Tcstv3
Atp2c1	Baz2a	Capzb	Chrnb3	Glipr2	Coq7	Hscb	Fzd6	Grn	Myc	Ppp1r15b	Pcp4	Rbl2	Ms4a4b	Ptgir	Slc35a3	Ptn	Tlr1	Suclg2	Tdrd7
Atp6v0e2	Baz2b	Carhsp1	Cited1	Glrx	Cpz	Hsd17b10	Gabrp	Gusb	Myd88	Ppp2r2d	Pde4dip	Rcan3	Ncr1	Pycard	Slc35b1	Pvalb	Tlr7	Tmem143	Tor3a
Atp7a	Bbx	Cask	Clcnkb	Gmppa	Cuta	Hspb2	Gas8	Hal	Myh7	Pprc1	Pdk4	Reep2	Nkg7	Rab32	Slc35c1	Rbp2	Tnfaip8	Tpd52l1	Trafd1
Atp7b	BC005624	Casp7	Cldn16	Gmppb	Dao	Ier3ip1	Gfra1	Has3	Nek6	Prr13	Pdlim3	Rnf13	Nsg2	Rab3il1	Smarca5	Rptn	Tnfrsf18	Tpi1	Trim21
Atp8a1	Bckdhb	Cast	Cldn2	Gng12	Dbf4	Ift20	Gmcl1	Havcr2	Nfkb2	Ptges	Pdlim5	Rnf181	Nup210	Rel	Smarcc1	Ryr1	Tnfrsf4	Tuba4a	Trim25
Atrn	Bcl9	Cbwd1	Cldn6	Gnl3	Dbn1	Immp1l	Gpr108	Hebp1	Nfkbie	Ptgs2	Pfkm	Rps27l	Pacsin1	Rgs19	Snap23	Sdr42e1	Trpv2	Tufm	Ube2l6
Atrx	Bclaf1	Ccdc115	Clec2g	Gorasp2	Dck	Itfg1	Gprc5c	Hexa	Ninj1	Ptpn1	Pgam2	Sac3d1	Padi2	Rnf149	Snrpd3	Serpinb11	Twf2	Ubac1	Zbp1
Atxn1	Bfar	Ccdc127	Clec4f	Gosr2	Dctpp1	Lage3	Gpsm2	Hexb	Noxo1	Ptpn2	Phkg1	Sat1	Pde2a	Rnpep	Snx12	Serpinb2	Unc93b1	Uck1	Znfx1
Atxn2	Bicd1	Ccdc91	Clgn	Gpatch4	Depdc1a	Lcmt1	Grb7	Hmox2	Orm1	Ralgds	Pi16	Scn1b	Pglyrp2	Scamp2	Spats2	Serpinb5	Vav1	Uqcrc1
Avl9	Birc2	Ccnc	Cngb3	Grwd1	Dhfr	Lsm10	Grhl2	Hrh1	Orm2	Rasd1	Pitx2	Sesn2	Pou2af1	Sh2b2	Spcs2	Serpinb7	Was	Uqcrc2
AW549877	Birc6	Ccnh	Cntn2	Gtf2f1	Dhrs7b	Lxn	Gsta4	Hsd11b2	P2ry2	Rassf1	Pln	Sfmbt1	Pou2f2	Sh3bgrl3	Spcs3	Sim2	Wwp2	Uqcrfs1
Axin2	Braf	Cct2	Cntn3	Gtf2f2	Dkk2	Lyplal1	Gstt3	Igfbp3	Pappa	Rela	Popdc2	Sh3bgrl2	Prkcb	Sirpa	Ssb	Slc28a3	Xcl1	Vdac1
B230219D22Rik	Brd1	Cct4	Cntnap2	H13	Dlgap5	Mcat	Gstz1	Igfbp6	Pgf	Relb	Ppp1r1a	Slc12a8	Prkcq	Skap2	Ssr1	Slc46a2		Vegfb
B4galt4	Brd2	Cct5	Cntnap4	Hars	Dna2	Med30	Hadh	Il1rl2	Phox2a	Rhoc	Pygm	Slc19a2	Ptpn22	Sla	Ssr3	Smpd3
Bace1	Brd3	Cct7	Col10a1	Hdac6	Dnajc5b	Mff	Hcfc1r1	Insl6	Pigr	Rhou	Rab33a	Slc2a8	Ptprc	Slamf8	St13	Smtnl1
Baiap3	Brd8	Cda	Col11a1	Hdgf	Dnmt1	Mgst3	Hnmt	Itgae	Pim1	Riok1	Retn	Slc2a9	Ptprcap	Slc11a1	Stip1	Sprr1b
Bambi	Brpf1	Cdc123	Col22a1	Hdlbp	Dnmt3l	Mmd	Hs1bp3	Itgax	Pla1a	Riok3	Rnf207	Slc6a8	Qprt	Slc11a2	Suv39h1	Sprr3
Bbs2	Brwd1	Cdc16	Col25a1	Heatr1	Dolpp1	Mrpl11	Hs6st2	Itih1	Plek	Ripk1	Rtn2	Sncg	Rab37	Slc13a2	Tfrc	Sult2b1
BC005537	Btrc	Cdc37	Col2a1	Hmgcr	Dsn1	Mrpl13	Hsd17b4	Kcnj10	Plk3	Rnd3	Rxrg	Stam	Ralgps2	Slc15a3	Tm9sf3	Sytl1
BC028528	Camta2	Cdc42	Col9a1	Hnrnpd	Dtl	Mrpl14	Hspa2	Kynu	Plxnb2	Rps6ka2	Ryr2	Stambp	Rasgrp1	Slc16a6	Tmed3	Tbx15
Bcas3	Capn10	Cdc42ep5	Col9a2	Hsd17b7	Dtymk	Mrpl23	Hspa4l	Lair1	Ppfibp2	S100a8	Scara3	Stard3nl	Rassf5	Slc31a2	Tmem176a	Tgm3
Bckdha	Caprin2	Cdc5l	Cpa1	Hspa9	Dut	Mrpl34	Hspb11	Laptm5	Ppp1r14d	S100a9	Scara5	Sulf2	Rhoh	Slpi	Tmem176b	Tmem40
Bcl2l2	Casc3	Cdca4	Cpa5	Hspbp1	E2f1	Mrpl39	Id4	Lgmn	Proz	Samsn1	Serpinf1	Sumf1	S1pr4	Sp5	Tmem39a	Tmem79
Bcl7a	Casp2	Cdk2	Cplx3	Htt	E2f3	Mrps21	Ift122	Lipa	Ptafr	Sdc4	Sfrp5	Taf6	S1pr5	Stard5	Tnpo1	Tmod4
Bcr	Casp9	Cdk5rap3	Cpn2	Iars	E2f8	Mrps33	Ift172	Lipf	Ptger4	Sdcbp	Sgca	Tax1bp3	Satb1	Syngr2	Tollip	Tnnc2
Bdnf	Catsper2	Cdk7	Cpsf4l	Ide	Ect2	Mrps35	Ift74	Ltbp2	Ptgs1	Sephs2	Sgcg	Tbc1d19	Sbk1	Tcirg1	Tssc4	Tnni1
Bex4	Cbll1	Cdk9	Creb3l3	Igfbp4	Efemp2	Mrps36	Ift80	Ly75	Ptx3	Serpine1	Sh3bgr	Tbc1d22a	Scml4	Tgfbi	Txndc11	Tnni2
Bicd2	Cc2d1a	Cdkn2aipnl	Crisp2	Il11	Eln	Msl3	Ift81	M6pr	Rab20	Sertad1	Slc22a1	Thtpa	Sell	Tlr6	Txndc5	Tnnt3
Bmf	Ccdc114	Cenpc1	Crtac1	Il13ra1	Eme1	Msrb2	Ift88	Mafb	Rab8b	Slc16a3	Slc2a4	Thyn1	Serpinb1a	Tm9sf4	Uba5	Trex2
Bmi1	Ccdc137	Cenpo	Crybb1	Il1r1	Ercc6l	Mtg1	Igsf9	Man2b1	Rbm47	Slc2a1	Slc38a3	Tm7sf3	Sh2d2a	Tmem106a	Ubfd1	Trp63
Bmp5	Ccdc47	Cfdp1	Crygs	Imp4	Etv4	Mycbp	Ikzf2	Man2b2	Rgs16	Slc3a2	Slc47a1	Tmco3	Sh3kbp1	Tmem192	Usp10	Wfdc5
Bmp6	Ccdc77	Chac2	Ctnna2	Ints5	Exo1	Naca	Ildr1	Manba	Ripk2	Slc9a3r1	Sln	Tmed4	Sidt1	Tmprss4	Xpo1	Wnt4
Bmpr2	Ccdc82	Chchd4	Cubn	Ints7	Ezh2	Ndufa1	Ino80b	Mcoln3	Rnf19b	Slfn1	Smarcd3	Tmem116	Sit1	Tnfrsf1b	Ywhah
Bmx	Ccdc88a	Chid1	Cuzd1	Ipo4	Fanca	Ndufa12	Iqcc	Mdk	Rrbp1	Slfn2	Smoc1	Tmem19	Sla2	Tpd52
Bmyc	Ccdc9	Chmp2a	Cyp21a1	Ipo5	Fanci	Ndufa13	Irx5	Mfsd1	Saa1	Slfn4	Smoc2	Tmem30b	Slamf6	Traf2
Boc	Ccdc97	Chmp6	Cyp24a1	Itga3	Fancl	Ndufa2	Isoc2b	Mmp12	Saa2	Smad1	Smpx	Tnfrsf10b	Slc14a1	Tspo
Bptf	Ccnl1	Chrac1	Cyp2c55	Itga5	Fbln2	Ndufa3	Itpka	Mmp13	Saa3	Smox	Smyd1	Tnfrsf21	Snn	Tyrobp
Brap	Ccnl2	Ciapin1	Cyp2j13	Itpa	Fbn1	Ndufa4	Kcnh3	Mmp19	Sec1	Smpd1	Sostdc1	Tob1	Spib	Vnn1
Bsdc1	Ccnt1	Clcc1	Cyp2j5	Jak3	Fignl1	Ndufa5	Kcnmb2	Mmp2	Sele	Sntb2	Sucnr1	Tpp1	Spn
Btbd2	Ccnt2	Cln5	Cyp7a1	Jmjd6	Fkbp10	Ndufa6	Kif21a	Mrc1	Selp	Snx10	Sult1d1	Triap1	Srpk3
Btbd3	Ccs	Clns1a	Dab1	Kat2a	Fkbp11	Ndufa7	Kif3a	Ms4a7	Sema6b	Snx20	Sync	Trim11	St6gal1
C2cd2l	Cd2ap	Clp1	Dazl	Kif3b	Flna	Ndufa8	Klc4	Msr1	Sema7a	Socs3	Synpo2	Trim32	Stat4
C330007P06Rik	Cd46	Clpb	Dbh	Klhl25	Fmn1	Ndufb10	Klkb1	Myo5a	Serpina3m	Sod2	Sypl2	Trim6	Stk17b
C87436	Cdc37l1	Clpp	Dcc	Kpna4	Fn1	Ndufb11	Lhb	Myo7a	Sfn	Sphk1	Tbx20	Trp53inp1	Tbx21
Cab39	Cdk5	Clptm1l	Dcx	Krt18	Foxm1	Ndufb2	Lhx3	Myof	Sftpd	St3gal1	Thrsp	Tsc22d1	Tcf7
Cachd1	Cdk8	Cltb	Defb2	Krt19	Fscn1	Ndufb3	Lias	Naaa	Skil	Stat3	Tmem38a	Ttc23	Thy1
Cacna2d1	Celsr2	Cltc	Dlg2	Krt7	Fstl1	Ndufb5	Lnx1	Naga	Slc13a3	Stat5a	Tmem45b	Ttll1	Tnfrsf13b
Cacnb2	Cep152	Cmpk1	Dlk1	Krt8	Gale	Ndufb7	Lrig1	Nagk	Slc25a25	Stk19	Tnnc1	Ube2e2	Tnfrsf13c
Cadm1	Cep250	Cnih4	Dlk2	Kti12	Galns	Ndufb8	Lrrc18	Naglu	Slc39a14	Tank	Tnni3	Uevld	Trat1
Cadps2	Cep350	Cnnm4	Dll3	Lap3	Gins1	Ndufb9	Lrrc23	Neu1	Slc39a4	Tbcc	Tnnt1	Vangl1	Tspan32
Calcrl	Cep68	Cnot7	Dlx4	Larp1	Gjb4	Ndufc1	Lrrc46	Npc1	Slc41a2	Tbk1	Tnnt2	Vhl	Txk
Calhm2	Cep70	Cog2	Dmbx1	Larp7	Gjb5	Ndufs4	Lrrc56	Npc2	Slc5a1	Tgm2	Tpm1	Vpreb1	Zap70
Cand1	Cept1	Cog6	Dmgdh	Ldha	Gli3	Ndufs5	Lrrc6	Npl	Slc6a20a	Tifa	Tpm2	Vps39	Zcchc18
Capn2	Cgnl1	Cog8	Dmp1	Lig3	Gmnn	Ndufv2	Ly6g6d	Npy	Slc7a11	Tlr2	Trdn	Vti1a
Card10	Chd1l	Coil	Dnase1	Lman1	Gpr85	Nedd8	Lyzl4	P2ry12	Slc7a2	Tmco4	Trim54	Wipi1
Casd1	Chd4	Commd1	Dok5	Lmna	Grem1	Nenf	Lztfl1	Pctp	Slco1a5	Tmem51	Ttn	Zfp688
Caskin2	Chd6	Commd4	Dpep3	Lmnb2	Gtse1	Nfs1	Magix	Pdcd1	Smpdl3b	Tnfaip2	Txlnb	Zfp810
Cat	Chd8	Commd9	Dppa3	Loxl4	Guca1a	Nkiras1	Mak	Pdgfc	Snai2	Tnip1	Ucp1	Zmat3
Cav1	Cherp	Copb1	Dppa4	Lpar1	Has2	Nol3	Mcee	Phex	Soat2	Tox4	Usp13
Cav2	Chfr	Copb2	Dpys	Lpcat3	Hat1	Nop10	Mdm1	Pkib	Sorcs2	Trem1	Vit
Cbfa2t3	Chka	Cope	Drd2	Lrrc59	Hells	Nptn	Med31	Pla2g15	Sprr1a	Trem3	Xirp1
Cbs	Chml	Cops2	Drd4	Lrrc8c	Hemk1	Nqo2	Meig1	Pla2g2e	St14	Txn1	Yipf7
Cbx3	Chuk	Cops3	Dscam	Lsg1	Hmgb2	Nt5c	Mfsd6l	Pla2g4a	Steap4	Txnrd1
Cbx4	Cic	Cops4	Dscaml1	Lsm12	Hmgb3	Ntan1	Mgat3	Pld3	Tgif1	Ubd
Cbx7	Ciz1	Cops5	Dspp	Lsm2	Hmmr	Nudt14	Mgst1	Plxnc1	Tgm1	Ugcg
Ccdc28a	Ckap5	Cops6	Dusp15	Lss	Igf1	Oaz1	Mgst2	Polr1c	Timp1	Vcam1
Ccdc85a	Clasp2	Cops7a	Ecel1	Ltv1	Il3ra	Osbpl1a	Mlf1	Ppfia4	Tjp3	Wars
Ccdc92	Clcn2	Cops8	Efna3	Magohb	Impa2	Osgep	Mns1	Ppic	Tmc4	Xbp1
Ccndbp1	Clcn6	Coq3	Efna4	Mak16	Incenp	Oxa1l	Morn3	Prcp	Tmem37	Ywhab
Ccng2	Clec2d	Coq5	Elavl3	Mal	Iqgap3	Paics	Morn4	Procr	Tnf	Zc3h12a
Ccni	Clk1	Cox15	Emilin3	Mast2	Kdelr3	Papss1	Mpst	Prom1	Tnfaip3	Zfp281
Ccpg1	Clk2	Cox19	Enam	Mboat1	Kif11	Park7	Msh2	Psap	Tnfaip6	Zfp36
Cd36	Clk3	Cpsf3	Epgn	Mecr	Kif18a	Pcbd2	Mst1	Ptger2	Tnfrsf11a
Cd81	Clk4	Crcp	Epha6	Metap1	Kif20a	Pdcl3	Mtif2	Rab11fip5	Tnfsf14
Cd93	Clpx	Creb3	Epha8	Mettl1	Kif22	Pepd	Myb	Rab15	Traf3
Cd99l2	Cluap1	Cript	Eps8l3	Mif	Kif23	Pex7	Mycbpap	Renbp	Vasp
Cdadc1	Cnot2	Crtap	Eya4	Mis12	Kif2c	Pfn2	Mzf1	Rgs1	Vnn3
Cdc42bpa	Cnot3	Cse1l	F2rl3	Mlec	Kif4	Phpt1	Nek4	Rgs10	Zfp46
Cdc42ep1	Cnot4	Ctbs	F9	Mllt11	Kif5c	Phyh	Nme5	Rilpl2
Cdc42ep3	Cntnap1	Ctnnbl1	Fabp2	Mmp14	Kifc1	Pigp	Nphp1	Rnf128
Cdh11	Col20a1	Cul2	Fam169a	Mphosph10	Klhdc8a	Polr2g	Odf2l	Saa4
Cdh13	Col7a1	Cul3	Fam3b	Mre11a	Kpna2	Polr2i	Oxct1	Sass6
Cdh4	Cpeb4	Cul4a	Fbln7	Mrpl15	Krt20	Pop5	P2rx4	Scpep1
Cdh5	Creb1	Cul4b	Fbxw14	Mrpl38	Lgals1	Prdx2	P2rx6	Sfrp1
Cdipt	Crebbp	Cwc15	Fga	Mrpl52	Lhx2	Prdx4	P4ha1	Sgpl1
Cdkl2	Crebzf	Cyb561d2	Fgf14	Mrps18b	Lig1	Prkra	Pacrg	Siglec1
Cdkn1b	Crocc	Cyb5r1	Fgf15	Mybbp1a	Lin9	Pstk	Pcp4l1	Slamf7
Cdkn1c	Crtc2	Cyb5r4	Fgf21	Myo19	Lmnb1	Ptgr2	Pde6h	Slamf9
Cdo1	Csnk1a1	D6Wsu163e	Fgf23	Nars	Loxl1	Pts	Phtf1	Slc29a3
Chchd10	Csnk1g2	Dap	Fgf3	Nbn	Lrp8	Qdpr	Pigq	Slc35b2
Chchd7	Csnk2a2	Dap3	Fgf5	Ncl	Lsm4	Rab40b	Pik3r2	Slc37a2
Chic1	Cspp1	Dapk3	Fhl3	Ndufab1	Mad2l1	Ramp1	Plxna3	Slc39a11
Chm	Cstf3	Dbnl	Fhl5	Nhp2	Mark1	Rangrf	Pofut1	Slc6a12
Chmp4c	Ctns	Dbr1	Fkbp6	Nip7	Mastl	Rbbp7	Pon3	Slc7a7
Chmp5	Cyp4f13	Dcun1d1	Foxi1	Nle1	Mcm10	Rdh14	Prkag2	Slc7a8
Chmp7	Cyth1	Dcun1d5	Frzb	Nmd3	Mcm2	Reep5	Proc	Snx5
Chst1	Cyth2	Dda1	Fut2	Nme6	Mcm3	Rnaseh2c	Prpsap2	Spp1
Chst2	D2hgdh	Ddx1	Gabra1	Nnmt	Mcm4	Rnf130	Prss8	Spsb4
Chst3	Dbt	Ddx20	Gabra2	Noc2l	Mcm5	Rnf7	Ptprz1	Stac2
Chst7	Dcp1a	Ddx41	Gabra6	Noc4l	Mcm6	Romo1	Rarb	Syn2
Clasp1	Dctn1	Ddx47	Gabrb2	Nol12	Mcm7	Rpa3	Rassf9	Syngr1
Clcn3	Ddb2	Ddx56	Gabrb3	Nol6	Melk	Rpl11	Rcn1	Tbxas1
Cldn5	Ddhd2	Ddx59	Gabrg1	Nolc1	Mest	Rpl13a	Rec8	Tep1
Clec14a	Ddx17	Dedd	Gabrg2	Nop14	Metrn	Rpl22	Resp18	Tgfbr1
Clec3b	Ddx19b	Def8	Gabrg3	Nop16	Mfap5	Rpl22l1	Rfx3	Tlr4
Clip1	Ddx42	Denr	Gabrr1	Nop2	Mgp	Rpl35	Rhbdd2	Tlr8
Clstn1	Ddx46	Dera	Gad2	Nr2c2ap	Mki67	Rpl37a	Rhbg	Tm4sf5
Clstn2	Ddx5	Derl2	Gbgt1	Nras	Mlh1	Rpl7	Rhpn1	Tnc
Cmtm8	Ddx50	Dffa	Gbx2	Nrip3	Mmab	Rpp21	Ribc1	Tnfrsf23
Cnn2	Deaf1	Dgcr2	Gdap1	Nsun2	Mogat2	Rps10	Rnf186	Tnfsf11
Cnot6	Dennd1a	Dhodh	Gdap1l1	Nsun5	Mrpl12	Rps17	Rnf32	Tnfsf8
Cnot6l	Dennd1b	Dhps	Gdf11	Nudcd1	Mrpl49	Rps24	Ropn1l	Tpcn2
Cntln	Dffb	Dhrs1	Gdf3	Nup155	Mrps25	Rps25	Rpap3	Trem2
Col4a3	Dgcr8	Dhrs4	Gfap	Nup188	Mtbp	Rps3	Rpgr	Ttyh2
Col4a4	Dgka	Dhx15	Ghrl	Nup43	Mxd3	Rps4x	Rsph1	Uap1l1
Col4a5	Dgkq	Dhx32	Gja10	Nup50	Mybl2	Rps5	Scgb3a2	Unc119
Col4a6	Dgkz	Dhx38	Gja8	Nup54	Myef2	Rps7	Sdccag8	Vash2
Cox7a2l	Dhx16	Diablo	Gjd4	Nup98	Nans	S100a1	Serf1	Vps18
Cpd	Dhx30	Dld	Gkn2	Nupl1	Nasp	S100a13	Sesn3	Vps41
Crbn	Dhx36	Dnaja2	Gldc	Nus1	Ncam1	Sccpdh	Sgpp1
Creb3l2	Dhx57	Dnaja3	Glra1	Opa3	Ncapd2	Scp2	Siae
Crim1	Dhx9	Dnajc11	Glra3	Oxsr1	Ncapg	Sdf2	Sirt3
Crip2	Dicer1	Dnajc18	Glrp1	Pa2g4	Ncapg2	Sdhc	Six1
Crispld1	Dido1	Dnajc8	Gnb3	Pdcd6ip	Ndc80	Sdhd	Six4
Crlf3	Dip2b	Dnpep	Gng13	Pdlim7	Necab3	Serf2	Slc22a18
Crym	Dlg1	Dpagt1	Gpa33	Pdss1	Nefh	Serpinb6a	Slc23a1
Csad	Dlg4	Dpm2	Gpr12	Pelp1	Neil3	Sf3b5	Slc25a17
Csde1	Dlg5	Dpp3	Gpr27	Pgk1	Nek2	Sgcb	Slc44a4
Csgalnact1	Dlgap4	Dr1	Gpr3	Phlda1	Nme4	Sil1	Smarcal1
Csgalnact2	Dmtf1	Drg1	Gpr45	Pip5k1a	Nme7	Slc25a11	Smarce1
Csnk1e	Dnajc7	Drg2	Gpr50	Plaa	Nrcam	Slc37a4	Sobp
Cst3	Dnd1	Dtnbp1	Gpr63	Plod1	Nrm	Snapin	Sox2
Ctcf	Dnm1l	Dtwd1	Gprc5d	Plod3	Ntrk2	Snrnp25	Spa17
Ctdsp1	Dnmt3a	Dusp22	Gprin1	Plp2	Nudt1	Snrnp27	Spag6
Ctdspl	Dnmt3b	Dym	Gria2	Pno1	Nudt5	Snrpg	Spag7
Ctnna1	Dock6	E130309D02Rik	Gria4	Pola2	Nuf2	Srp14	Spef1
Ctnnal1	Dock7	E2f5	Grid2	Pold2	Nup37	Stau2	Spint2
Ctps2	Dpf2	Eapp	Grik1	Pole4	Nup93	Stx8	Strbp
Ctsf	Dpm1	Ebag9	Grik3	Polr1a	Nusap1	Sugt1	Styxl1
Cux2	Dppa5a	Ecd	Grin1	Polr1b	Oaf	Syap1	Syn3
Cyb5r3	Dqx1	Ece2	Grin2a	Polr1e	Olfml2b	Taldo1	Syt5
Cyhr1	Dus3l	Edem2	Grin2b	Polr3d	Parp1	Tbca	Tbx1
Cyp27a1	Dusp11	Eif2ak1	Grpr	Ppa1	Pask	Timm8b	Tcea3
Cyp2b10	Dvl1	Eif2b1	Gsg1	Ppan	Pbk	Tkt	Tcte1
Cyp2f2	Dvl2	Eif2b2	Gucy2c	Ppm1g	Pbp2	Tm2d2	Tekt1
Cyp2j9	Dync1h1	Eif2b5	Gucy2e	Ppme1	Pcna	Tm2d3	Tekt2
Cyp4b1	E4f1	Eif2s3x	Gulo	Ppp4r1	Pde10a	Tmco1	Thnsl1
Cys1	Echdc2	Eif3e	Gzme	Prdm4	Pdxk	Tmem135	Thnsl2
Cyth3	Edc4	Eif3i	Hand2	Prmt1	Phf19	Tmem141	Tm6sf2
Cyyr1	Eea1	Eif3l	Hao1	Prmt3	Phgdh	Tmem205	Tmem106c
D030056L22Rik	Eed	Eif3m	Hapln1	Prmt7	Pkmyt1	Tmem218	Tmem175
D230025D16Rik	Efnb3	Eif4e	Hapln2	Prpf31	Plau	Tmem9	Tmem216
Dach1	Efr3a	Eif4ebp1	Hcn1	Prps1	Plk1	Tomm40l	Tmprss2
Dact1	Ehmt2	Eif4g2	Hcn2	Psmd1	Plk4	Tomm7	Tmtc4
Dag1	Eif2ak4	Elp4	Hdgfl1	Psmd11	Pmepa1	Trappc2l	Tmub1
Dapk2	Eif2b4	Emd	Hgd	Psmd12	Pmf1	Tspan3	Trp73
Dcbld1	Eif4enif1	Emg1	Hmga2	Psmd2	Pola1	Tst	Tsnaxip1
Dctn4	Eif4g3	Enoph1	Hnf4a	Psmd7	Pold1	Tusc2	Ttc16
Dctn6	Eif5b	Eny2	Hnf4g	Psmg1	Pole	Txn2	Ttc30b
Ddah2	Elk4	Ercc1	Hpca	Pspc1	Pole2	Txndc17	Ttc8
Ddc	Ell	Ercc3	Hrk	Ptbp1	Ppp1r14b	Uba52	Ttll3
Ddx3x	Eml3	Ergic2	Hsd3b3	Pus1	Prc1	Ube2e3	Ubxn10
Dennd5a	Eml5	Eri1	Htr1d	Pvr	Prim1	Ubl5	Ubxn11
Dgke	Endog	Ethe1	Htr1f	Pwp1	Prim2	Ugp2	Uhrf1bp1
Dguok	Ensa	Exoc7	Htr3a	Pwp2	Prrx1	Uqcrb	Uox
Dhrs3	Ep400	Exosc1	Htr3b	Qpctl	Prrx2	Uqcrh	Wdr31
Dhrs7	Epc1	Exosc4	Htr4	Rab10	Prss16	Uqcrq	Wdr6
Dkk3	Epm2a	Exosc8	Htr5a	Rab4b	Prss35	Urod	Wdr78
Dll4	Epn1	Extl2	Htr5b	Rab7	Psat1	Uros	Wif1
Dmd	Epor	Fadd	Htr6	Rab8a	Psrc1	Vbp1	Wnt11
Dnajc27	Eps15	Fads2	Ibsp	Rae1	Ptch2	Vdac2	Xylb
Dnajc28	Eps15l1	Faf1	Icam5	Ranbp1	Ptprn	Vdac3	Zbtb12
Dock9	Eps8l1	Faim	Ido2	Rars	Pttg1	Vim	Zfand1
Dok4	Ercc2	Fam120a	Ifnab	Rbbp8	Pycr1	Vkorc1	Zfand6
Dpep1	Ercc4	Fam149b	Igdcc3	Rbm19	Pyy	Vps29	Zfp474
Dpp4	Ern1	Fastkd2	Igfbpl1	Rcan1	Racgap1	Wbp1	Zfp524
Dpp8	Esco1	Fbxo45	Igll1	Rin1	Rad18	Wdr61	Zmynd10
Dpyd	Esf1	Fbxo6	Ihh	Rnf4	Rad51	Yaf2
Dpysl2	Etnk1	Fbxo8	Il1rapl2	Rnps1	Rad51ap1	Zswim7
Dpysl5	Evc	Fdft1	Il2	Rpl7l1	Rad54l
Dstyk	Ewsr1	Fdps	Il21	Rps6ka3	Rangap1
Dtna	Exoc1	Fkbp1b	Il23a	Rrp15	Rbl1
Dusp3	Exosc7	Fntb	Il24	Rrp1b	Rcc1
Dusp7	Eya3	Foxred1	Impg1	Rrp9	Recql4
Dynll1	F11r	Ftsj1	Inhbc	Rrs1	Retnlb
Dyrk1a	Faah	Fundc2	Irs4	Rsl1d1	Rfc2
Ece1	Fam120b	Fxn	Irx4	S100a6	Rfc3
Eda	Fam13b	Fzr1	Irx6	Sae1	Rfc4
Edil3	Fam160a2	G6pc3	Itgb2l	Sar1a	Rfc5
Edn3	Fam20b	Gabarap	Jph3	Sec23ip	Rfwd3
Ednra	Fam53c	Gabpb1	Kcna4	Sec61a1	Ror2
Ednrb	Fam76b	Gadd45gip1	Kcnd1	Seh1l	Rpa2
Efemp1	Fancc	Galk1	Kcnh7	Shmt1	Rpsa
Efna1	Fance	Galnt1	Kcnj4	Shmt2	Rrm1
Efnb1	Fastk	Gart	Kcnj6	Slc23a3	Rrm2
Efnb2	Fastkd1	Gatad1	Kcnj9	Slc29a2	Sap30
Egfl7	Fbf1	Gatc	Kcnk10	Slc39a1	Scamp5
Ehbp1	Fbrs	Gcsh	Kcnq2	Slc39a7	Sdsl
Ehd2	Fbxl12	Gdap2	Kcns2	Slc7a1	Sec11c
Ehd3	Fbxo38	Gdi2	Keg1	Slc7a6	Sfxn1
Ehd4	Fbxw4	Gemin7	Kera	Slk	Shcbp1
Eif4a2	Fbxw5	Gemin8	Khdrbs2	Smarca4	Skp2
Elac1	Fgd6	Gfm1	Kif5a	Smn1	Slc46a1
Elf2	Fgfr1	Ghitm	Klf1	Smyd5	Smc2
Elk1	Fgfr1op2	Gins4	Klf17	Snap29	Smc4
Elk3	Fip1l1	Gipc1	Klhl1	Snd1	Snrpe
Elmo1	Fkbp15	Gmpr2	Kng1	Snrpa1	Spag5
Elovl5	Fkbp8	Gnai3	Lalba	Snx9	Sparc
Emcn	Flcn	Gnb1l	Lao1	Spata5	Spc25
Emid1	Flii	Gnpnat1	Lbx1	Srfbp1	Stag3
Emp2	Fmo4	Golph3	Lcn8	Srm	Stc2
Eng	Fnbp4	Golt1b	Lhcgr	Srxn1	Stil
Enpep	Fndc3a	Gpaa1	Lhx4	St3gal4	Stxbp2
Enpp2	Foxj2	Gpc4	Lhx6	Steap1	Suv39h2
Enpp5	Foxj3	Gpn1	Lhx9	Stt3b	Syce2
Epas1	Frg1	Gpr88	Lman1l	Stx6	Syt13
Ephb4	Fryl	Gpr89	Lmx1a	Surf4	Syt8
Ephb6	Fubp1	Gps1	Lmx1b	Surf6	Tacc3
Epm2aip1	Fxr2	Grpel1	Lrp1b	Syncrip	Tcf19
Epn2	Fxyd7	Grsf1	Lrrc4	Taf1d	Tdo2
Eps8l2	Gab3	Gspt1	Lrrtm2	Taf5l	Tfdp1
Erbb3	Gabbr1	Gtf2e2	Lypd1	Tars	Tfpi2
Erc1	Gak	Gtf2h2	Lyzl1	Tbc1d1	Tgfb3
Erg	Gba2	Gtf2h4	Mas1	Tbl2	Thbs2
Esam	Gbf1	Gtf3a	Masp1	Tbl3	Tiam1
Esm1	Gcm1	Hax1	Matn1	Tcerg1	Timeless
Esr2	Gcnt2	Hgsnat	Matn3	Tead3	Tk1
Etl4	Gdi1	Higd1a	Mc1r	Thop1	Tm7sf2
Ets2	Gfm2	Hk1	Meis3	Timm10	Tmem121
Etv5	Gga1	Hmbs	Mep1b	Timm50	Tmem132a
Evi5	Ggnbp2	Hnrnpab	Mettl7b	Timm8a1	Tmem54
Exoc8	Ggt7	Hsd17b12	Mgat4c	Tinf2	Tnfaip8l1
Exosc2	Gigyf1	Hspa14	Mia2	Tirap	Top2a
Extl3	Gigyf2	Htatip2	Mixl1	Tjap1	Topbp1
Ezh1	Git2	Iah1	Mmd2	Tmed5	Tpmt
Fam126a	Glce	Igbp1	Mmp10	Tmem214	Tpx2
Fam126b	Gli1	Ilf3	Mmp20	Tnfrsf12a	Tradd
Fam131a	Gmeb1	Immt	Mmp24	Tnfsf9	Traf4
Fam160b1	Gnas	Ino80c	Mobp	Tomm40	Traip
Fam174a	Gnb2	Ints12	Morc1	Top1mt	Trim59
Fam43a	Golga2	Ints4	Mov10l1	Trabd	Trip13
Fam53a	Golga3	Ipo9	Msh4	Trim27	Ttk
Farp2	Golga4	Ipp	Mtnr1a	Trp53	Tubb2b
Fbln5	Golga5	Irak1	Myo7b	Tsr1	Tubb5
Fbxl14	Gosr1	Irak4	Myt1	Ttc39b	Tyms
Fbxl20	Gpatch1	Isca2	Myt1l	Tubb2a	Ube2c
Fbxl3	Gpatch2	Isoc1	Nags	Tubb6	Ube2s
Fbxo11	Gpbp1l1	Isy1	Naip1	Uba1	Ube2t
Fbxo21	Gphn	Itgb1bp1	Nat1	Ubap1	Uhrf1
Fbxo28	Gps2	Itm2a	Ncan	Ube2f	Ung
Fbxo3	Gramd1a	Jagn1	Ndst3	Ube2g2	Usp5
Fbxo9	Gramd4	Kbtbd4	Nefl	Ube2j1	Vill
Fbxw7	Grasp	Kcmf1	Nefm	Ube2j2	Vrk1
Fermt2	Grik5	Kcnk13	Nell2	Ube2m	Wasf1
Fgf1	Gripap1	Kctd20	Nepn	Ubqln1	Wfdc12
Fgf18	Gtf2a1	Kctd5	Neto1	Ubtd1	Wnt10a
Fgf7	Gtf2ird2	Kdelr1	Neurog3	Uchl4	Wnt5a
Fgfr3	Gtf3c2	Kdelr2	Ngf	Uck2	Wnt6
Fgfr4	Gtf3c5	Klhdc2	Nkx1-2	Ugdh	Zdhhc2
Fhl1	Gtpbp2	Kpna1	Nkx2-9	Umps	Zwilch
Fibin	Gtpbp6	Kpna6	Nlgn1	Upp1
Fign	H2-Ke6	Kpnb1	Nog	Uso1
Fkbp9	Hace1	Krcc1	Nos1	Utp20
Fktn	Hars2	Krtcap2	Npas1	Vars
Flt1	Hcfc1	Lactb	Npas3	Vcan
Flt4	Hdac7	Lactb2	Npffr2	Vcp
Fmo1	Heatr6	Lancl2	Nppc	Vps37c
Fmo2	Hectd3	Lipt1	Nptx2	Wdr1
Fmo3	Herc1	Lman2	Npy2r	Wdr12
Fmo5	Herc4	Lrrc40	Npy6r	Wdr36
Foxf2	Hgs	Lrrc41	Nr0b2	Wdr4
Foxk1	Hipk1	Lrrc42	Nr1h4	Wdr43
Foxo1	Hltf	Lsm1	Nr1i3	Wdr46
Foxo4	Hmg20b	Lsm3	Nr2e3	Wdr5
Foxp1	Hmgxb3	Lypla1	Nr5a1	Wdr55
Foxp2	Hmgxb4	Lyrm1	Nrg3	Wdr74
Frmd4b	Hnrnpa2b1	Mad2l2	Nrip2	Wdr75
Frmd6	Hnrnph1	Maea	Nrk	Wdr77
Fto	Hnrnph2	Magoh	Nrsn1	Xpnpep1
Fut8	Hnrnpm	Map2k1	Nrtn	Xpo5
Fyco1	Hnrnpr	Map2k2	Nt5c1b	Xrcc5
Fzd4	Hnrnpu	Mapk1	Ntm	Xrcc6
Fzd7	Hook2	Mapkap1	Ntsr2	Yars
G0s2	Hoxa3	Mapre1	Nxnl1	Ykt6
Gab1	Hoxb4	Mbd2	Oas1e	Yrdc
Gabarapl1	Hps3	Mbd3	Oas1h	Ythdf2
Gabra3	Hps4	Mcfd2	Oc90	Ywhag
Galnt11	Hsd3b7	Mcts2	Oca2	Ywhaz
Ganc	Hsf1	Mea1	Odf1	Zc3h15
Gap43	Hsf4	Med11	Olah	Zfp593
Gata2	Htra2	Med14	Olfm3	Zmynd19
Gata3	Huwe1	Med19	Olfr66	Zwint
Gata6	Idua	Med21	Olfr690
Gatad2a	Iffo1	Med24	Olfr78
Gatad2b	Ighmbp2	Med27	Opn4
Gcc2	Ik	Med29	Oprk1
Ggps1	Ikbkb	Med4	Oprl1
Ghr	Il15ra	Med6	Oprm1
Gimap6	Ilkap	Med7	Osr2
Gjc1	Impact	Med9	Otof
Gkap1	Inha	Metap2	Otog
Glcci1	Ino80	Mettl5	Otos
Glg1	Inpp4a	Mettl9	Oxct2a
Gmfb	Inppl1	Mfap3	P2rx3
Gna11	Insig2	Mfsd11	P2ry4
Gnao1	Ints6	Mfsd5	Pabpc2
Gnaq	Invs	Mgat2	Padi3
Gnb4	Iqgap1	Minpp1	Pax1
Gng11	Ireb2	Mlx	Pax6
Gnpda2	Irf3	Mmachc	Pax7
Golim4	Itch	Mmadhc	Pax8
Gopc	Itpr3	Mnat1	Pbx4
Gorasp1	Itsn1	Mocs2	Pcdh10
Gpatch8	Itsn2	Mpdu1	Pcdh15
Gpbp1	Ivns1abp	Mpg	Pcdh8
Gpc3	Jarid2	Mphosph6	Pcdhb5
Gpm6a	Jmjd1c	Mpi	Pcp2
Gpm6b	Kalrn	Mpp1	Pcsk2
Gpr182	Khdrbs1	Mrpl1	Pde1c
Gprasp1	Kifc2	Mrpl10	Pde6a
Gpsm1	Kifc3	Mrpl16	Pde6b
Gpt	Kin	Mrpl17	Pde6c
Grb14	Klc1	Mrpl18	Pdyn
Grem2	Klhdc3	Mrpl2	Pdzk1
Gria3	Klhl20	Mrpl20	Pex5l
Grk5	Krba1	Mrpl21	Pfpl
Grtp1	Kri1	Mrpl22	Pgc
Gsk3b	Krit1	Mrpl27	Piwil1
Gsn	Krr1	Mrpl28	Pkhd1
Gsta3	Krtcap3	Mrpl3	Pklr
Gstm1	Lama5	Mrpl32	Pla2g10
Gstm2	Lancl1	Mrpl33	Plac1
Gstm3	Las1l	Mrpl36	Plcz1
Gtf2h1	Ldb1	Mrpl37	Plek2
Gtf2i	Lemd2	Mrpl40	Pmfbp1
Gtf3c1	Leng8	Mrpl41	Pnlip
Habp4	Letmd1	Mrpl43	Pnliprp2
Hbp1	Lgals4	Mrpl44	Pou3f4
Hccs	Limd1	Mrpl45	Prl4a1
Hdac5	Lin37	Mrpl46	Prph
Herc2	Lmbr1l	Mrpl50	Prss22
Herpud2	Lonp1	Mrpl51	Prss28
Hexim1	Lrpprc	Mrpl54	Prtn3
Hey1	Luc7l	Mrpl55	Psca
Hhip	Luc7l2	Mrpl9	Psg19
Higd1b	Lypla2	Mrps11	Ptcra
Hip1	Lztr1	Mrps12	Pth2r
Hivep1	Madd	Mrps14	Ptk6
Hivep2	Mafg	Mrps16	Ptprn2
Hlcs	Man2c1	Mrps18a	Ptprt
Hmbox1	Map2k7	Mrps18c	Rag1
Hmg20a	Map3k8	Mrps2	Rcvrn
Hopx	Map4k2	Mrps22	Rdh16
Hoxa1	Mapk7	Mrps23	Reg3b
Hoxa5	Mapk8	Mrps24	Reg4
Hoxa7	Mapk8ip3	Mrps30	Rgr
Hoxb3	Mapkapk5	Mrps34	Rgs20
Hoxb5	Mapkbp1	Mrps5	Rgs8
Hp1bp3	Mapre3	Mrps7	Rhox9
Hpgd	Mark2	Mrrf	Rit2
Hs2st1	Mat2a	Msto1	Rnf17
Hs3st1	Matr3	Mtap	Robo3
Hsd11b1	Mbd4	Mtch2	Rpe65
Hspa12b	Mbd6	Mtfr1	Rph3a
Hunk	Mbip	Mtmr9	Rragd
Hyal2	Mbtd1	Mto1	Rtn4r
Ica1	Mcoln1	Mtrr	Rundc3a
Icam2	Mdm4	Mtx1	Rxfp2
Ids	Me2	Mtx2	Scg2
Ifngr1	Med12	Mul1	Scg3
Igf1r	Med23	Mvk	Scn11a
Il17d	Men1	Myg1	Scn1a
Il17rd	Mepce	Nap1l4	Scn8a
Il17re	Mesp1	Nat2	Scn9a
Il6ra	Mettl6	Ncaph2	Scrt1
Ing1	Mfsd8	Nde1	Sds
Ing3	Mgat1	Ndrg3	Sectm1a
Ing4	Mib1	Nedd1	Sectm1b
Inmt	Mib2	Nfu1	Sema5b
Inpp5a	Mier2	Nicn1	Serpina10
Inpp5e	Mink1	Nif3l1	Serpinb9b
Inpp5k	Mlh3	Nit2	Serpinb9c
Insr	Mllt10	Nkiras2	Sez6
Ip6k1	Mlxip	Nln	Sez6l
Ipo8	Mmaa	Nme2	Sez6l2
Irf6	Mocs1	Nmnat1	Shc3
Irs1	Mphosph8	Nmt1	Sim1
Itga8	Mphosph9	Nol11	Slc12a1
Itgb5	Mrm1	Npm1	Slc13a1
Itm2b	Mrpl24	Nrbf2	Slc14a2
Itpr1	Mrps9	Nsdhl	Slc17a6
Itpr2	Msh3	Nsmce1	Slc18a1
Jag1	Msl1	Nsmce2	Slc22a13
Jag2	Mst1r	Nt5c2	Slc22a2
Jmy	Mtch1	Nt5m	Slc22a8
Jun	Mtcp1	Nubp1	Slc24a1
Kank2	Mtf1	Nubp2	Slc26a5
Kank3	Mtf2	Nucb2	Slc26a7
Kat2b	Mtfmt	Nudcd2	Slc30a3
Kazald1	Mthfr	Nudt16l1	Slc34a1
Kbtbd2	Mtm1	Nudt19	Slc35f4
Kcnb1	Mtmr1	Nudt2	Slc4a10
Kcnip4	Mtmr3	Nudt21	Slc5a11
Kcnk3	Mtss1	Nudt22	Slc5a4a
Kcnn2	Mutyh	Nup107	Slc5a4b
Kcnq5	Mycbp2	Nup160	Slc5a5
Kctd2	Mylip	Nup35	Slc5a7
Kdr	Myo9b	Nupl2	Slc5a9
Kif13a	N4bp2l1	Nxt1	Slc6a1
Kif16b	Napb	Ola1	Slc6a18
Kif1b	Napg	Orai1	Slc7a13
Kif3c	Nav2	Ormdl1	Slc8a2
Kifap3	Nbeal2	Ostc	Slco1a1
Kit	Ncoa5	Otub1	Slco1a6
Kitl	Ncoa6	Otud6b	Slco6c1
Klf12	Ncor2	P4hb	Slit1
Klf3	Nek1	Pacrgl	Slitrk1
Klf6	Nek8	Pafah1b2	Smc1b
Klf7	Neurl4	Pafah1b3	Sntg1
Klf9	Nfatc2ip	Paip2b	Sorcs1
Klhl21	Nfx1	Pak1ip1	Sorcs3
Klhl24	Ngdn	Parl	Sox1
Klhl5	Nipbl	Parp2	Spesp1
Klhl7	Nkap	Pcbp1	Spock1
Klhl9	Nktr	Pcid2	Spock3
Krt23	Nnt	Pcmt1	Spz1
Krt80	Nono	Pdcd10	Srd5a2
Ktn1	Notch1	Pdcd2	Sst
Lama2	Nova1	Pdcd2l	Sstr1
Lama3	Npepl1	Pdcd6	St8sia3
Lamb2	Npff	Pde6d	St8sia5
Lamp1	Nr1h2	Pdk3	Stk31
Lats2	Nr4a2	Pdzd11	Stk32b
Lcor	Nr6a1	Pemt	Stk32c
Ldb2	Nrbp1	Pes1	Stmn3
Ldhb	Nrbp2	Pex11b	Stra8
Lepr	Nrf1	Pex12	Sult4a1
Lifr	Nsd1	Pex19	Svop
Limch1	Nsun4	Pex3	Sycp1
Lims1	Nt5dc3	Pfdn1	Syngr3
Lims2	Ntng2	Pfn1	Synpr
Lmbrd1	Nudcd3	Pgam1	Syt1
Lmo7	Nudt13	Pgam5	Syt12
Lnx2	Nufip1	Pgls	Syt2
Lonp2	Nup85	Pgm1	T
Lpcat1	Odf2	Pgp	Tac1
Lpin1	Ogfod2	Phax	Tacr3
Lpin2	Ogt	Phb2	Tal2
Lrp4	Olig3	Phf23	Tas1r1
Lrp6	Oplah	Phf5a	Tas1r2
Lrrc1	Os9	Phospho2	Tas2r108
Lrrc58	Osbp	Pias2	Tdrd1
Lrrk1	Otud4	Pigf	Tecta
Lsm14a	Otud5	Pigk	Tex16
Ltbp3	Ovgp1	Pigu	Tff3
Ltbp4	Pabpn1	Pigx	Thbs4
Lysmd1	Paf1	Pin1	Tktl1
Lysmd2	Parg	Pitpna	Tll2
Macf1	Parp4	Pitrm1	Tm4sf20
Maf1	Parp6	Plekhb2	Tmc1
Magi1	Pbx2	Plrg1	Tmem144
Magi3	Pcbp4	Pmpca	Tmprss11d
Mal2	Pcf11	Pmpcb	Tmprss3
Maml1	Pcgf2	Pnkp	Tnfrsf8
Maml2	Pcsk4	Pofut2	Tnfsf4
Man1a2	Pcsk7	Pold4	Tpbpb
Mansc1	Pcyt2	Polr1d	Tph1
Map1lc3b	Pdik1l	Polr2b	Tpte
Map2k5	Pds5a	Polr2c	Trh
Map3k11	Pear1	Polr2d	Trhr
Map3k2	Pex26	Polr2e	Trim17
Map3k3	Pex5	Polr2f	Trim31
Map3k4	Pfkfb2	Polr2h	Trim60
Map4k3	Phf1	Polr2j	Trpc4
Map4k5	Phf20l1	Polr3c	Trpc5
Mapk14	Phf21a	Polr3h	Trpc7
Mapk3	Phf3	Polr3k	Trpm1
Mapk9	Phf8	Pomgnt1	Trpm8
Mapre2	Phip	Pomp	Tshr
Mapt	Phka1	Pop4	Tsx
Marveld1	Phka2	Pop7	Tub
Marveld2	Phkg2	Ppat	Tubb3
Mat2b	Pi4ka	Ppcs	Tyr
Mbnl1	Pibf1	Ppib	Tyrp1
Mbtps1	Pick1	Ppie	Ucn2
Mccc1	Pigm	Ppp1ca	Ugt3a1
Mecp2	Pigo	Ppp1cc	Ugt3a2
Mef2a	Pip4k2c	Ppp1r11	Umod
Meis1	Pitpnm1	Ppp1r2	Unc13a
Meis2	Pkd1	Ppp1r7	Uroc1
Mertk	Pkd2	Ppp2ca	Ush2a
Mettl7a1	Plagl2	Ppp2r1a	Usp26
Mfap2	Plcb3	Ppp2r3c	Usp29
Mfge8	Plcg1	Ppp2r5c	Vgll1
Mfhas1	Pld2	Ppp4c	Vip
Mfsd6	Plekha1	Pqbp1	Vmn2r1
Mga	Plekhg2	Praf2	Vmn2r26
Mgll	Plekhg5	Prdx3	Vsx1
Mical2	Plp1	Prelid1	Wnt3
Mid1ip1	Pnn	Prkar1b	Wnt7b
Mid2	Pnpla6	Prkar2a	Wnt8a
Mknk2	Poldip3	Prmt6	Wnt8b
Mllt3	Polg	Psen1	Zbtb7c
Mllt6	Polg2	Psenen	Zp2
Mme	Poli	Psma1	Zp3
Mmp15	Polm	Psma2	Zp3r
Mospd2	Polr3a	Psma4	Zyg11a
Mpdz	Polr3e	Psma5
Mpp5	Polr3f	Psma6
Mpp7	Polrmt	Psma7
Mpv17	Pot1a	Psmb1
Msi2	Pou6f1	Psmb2
Msl3l2	Ppig	Psmb3
Mtmr10	Ppil2	Psmb4
Mtmr6	Ppox	Psmb5
Mustn1	Ppp1r12c	Psmb7
Mxd4	Ppp1r3f	Psmc1
Mxi1	Ppp2r5b	Psmc2
Mxra8	Ppp3cb	Psmc3
Myct1	Ppp5c	Psmc4
Myh14	Prdm5	Psmc5
Mylk	Prdm9	Psmc6
Mynn	Preb	Psmd10
Myo10	Prkag1	Psmd13
Myo1b	Prkdc	Psmd14
Myo1c	Prodh	Psmd4
Myo1d	Prpf3	Psmd5
Myo5b	Prpf38b	Psmd6
Myo5c	Prpf39	Psmd8
Myo6	Prpf40b	Psmd9
Myo9a	Prpf4b	Psmf1
Nap1l3	Prpsap1	Psmg2
Nbea	Prr14	Psph
Nbl1	Prr3	Ptcd1
Ncald	Psip1	Ptcd2
Nck1	Ptbp2	Ptdss1
Nck2	Ptcd3	Ptdss2
Ncoa1	Ptpn21	Pter
Ncoa2	Ptpn23	Ptger1
Ncor1	Ptpru	Ptges2
Ndst1	Pum2	Ptpn9
Nebl	Purg	Ptrh2
Nedd4	Pygo2	Pycr2
Nedd4l	R3hdm1	Pycrl
Nek7	Rab24	Qtrt1
Nek9	Rab2b	R3hcc1
Neo1	Rabep1	Rab11a
Nes	Rabep2	Rab13
Net1	Rabgap1	Rab1b
Nfat5	Rad52	Rab23
Nfatc1	Rad54l2	Rab25
Nfatc3	Raf1	Rab28
Nfia	Rai1	Rab31
Nfib	Ranbp10	Rab34
Nfic	Ranbp2	Rabepk
Nfix	Ranbp3	Rabggtb
Ngrn	Rapgef6	Rabif
Nin	Rara	Rabl3
Nisch	Rasa2	Rac1
Nit1	Rassf2	Rad17
Nkain4	Rassf7	Rad23a
Nkd1	Rbck1	Rap1b
Nkd2	Rbm15b	Rars2
Nlk	Rbm18	Rbks
Nol7	Rbm25	Rbm7
Notch2	Rbm26	Rbmx2
Notch3	Rbm28	Rcbtb2
Notch4	Rbm39	Rce1
Nox4	Rbm4b	Rchy1
Npnt	Rbm5	Rcl1
Npr2	Rbm6	Rcn3
Npr3	Rbpjl	Rdh11
Nr2c1	Rc3h2	Recql
Nr2c2	Rcbtb1	Reep3
Nr2f2	Rdh5	Rexo2
Nr3c1	Recql5	Rhoa
Nrp1	Rexo1	Rhod
Nsmaf	Rexo4	Rnaseh1
Ntn4	Rfc1	Rnf113a1
Nub1	Rfng	Rnf121
Numa1	Rfx1	Rnf26
Numb	Rfx2	Rnf34
Ocln	Rgl2	Rnf41
Ogn	Rgl3	Rnft1
Omd	Rgs11	Rnh1
Osbpl2	Rgs3	Rpa1
Osbpl5	Rgs9	Rpap2
Otud7b	Rhbdd1	Rpe
Oxr1	Rhbdd3	Rpl12
Pafah1b1	Rhbdf1	Rpl19
Pag1	Rhbdl1	Rpl6
Paip2	Rhot1	Rpl7a
Palmd	Rif1	Rplp0
Pank1	Ring1	Rpp30
Papolg	Rlf	Rpp40
Paqr4	Rmi1	Rps18
Paqr7	Rnf111	Rps2
Pard3	Rnf123	Rps6ka4
Pard3b	Rnf20	Rpusd1
Pard6b	Rnf220	Rraga
Pard6g	Rnf25	Rragc
Parvb	Rnf38	Rras2
Patz1	Rnf6	Rrn3
Pbrm1	Rnmt	Rspry1
Pbx1	Rnpc3	Rtn3
Pbx3	Rpap1	Rtn4
Pbxip1	Rprd1a	Rtn4ip1
Pcbp3	Rprd2	Ruvbl1
Pcdhb20	Rps6kb1	Rwdd2b
Pcm1	Rps6kb2	Rwdd4a
Pcmtd1	Rsrc1	S100a10
Pcmtd2	Rsrc2	Saal1
Pcnp	Rtkn	Samm50
Pcnx	Rttn	Sap30bp
Pcolce2	Rusc1	Sar1b
Pcyt1a	Rxrb	Sardh
Pdcd4	Ryr3	Scamp3
Pdcd7	Safb	Scarb2
Pde3a	Safb2	Scfd1
Pde4a	Sart1	Sdc1
Pde7a	Sart3	Sdf4
Pde8a	Sbf2	Sec11a
Pde9a	Sbno1	Sec13
Pdgfa	Sclt1	Sec22b
Pdgfb	Scmh1	Sec24d
Pdgfd	Scnm1	Sec63
Pdgfrb	Scrib	Senp1
Pdlim2	Scyl1	Sephs1
Pdpk1	Sec24c	Serbp1
Pecam1	Sec61a2	Sergef
Peli1	Sema4g	Serp1
Peli2	Senp2	Sf3a1
Pelo	Senp3	Sf3b4
Pex6	Senp6	Sft2d1
Pgrmc1	Serac1	Sgk3
Pgrmc2	Setd1a	Sh3gl1
Phactr1	Setd4	Shc1
Phactr2	Setdb1	Shoc2
Phf2	Sf3b1	Sigmar1
Phldb1	Sf3b2	Siva1
Pi4k2b	Sfxn2	Slbp
Pias1	Sfxn3	Slc10a3
Pigc	Sfxn4	Slc19a1
Pik3ca	Sgta	Slc25a13
Pik3r1	Sh2b1	Slc25a15
Pik3r4	Sh3pxd2a	Slc25a24
Pitpnc1	Sharpin	Slc25a39
Pja2	Sin3a	Slc25a44
Pknox1	Sipa1	Slc25a5
Pkp2	Sirt4	Slc30a5
Pkp4	Sirt7	Slc30a6
Pla2r1	Six5	Slc33a1
Plagl1	Skiv2l	Slc35a4
Plcb1	Slc12a7	Slc35b4
Plcb4	Slc1a5	Slc37a3
Plce1	Slc22a17	Slc6a14
Plekha2	Slc22a21	Smu1
Plekha3	Slc25a14	Smyd2
Plekha5	Slc25a28	Snap47
Plekhb1	Slc25a37	Snapc2
Plekhh1	Slc25a38	Snf8
Plekhh2	Slc35b3	Snip1
Plekhh3	Slc35d1	Snrnp40
Pllp	Slc37a1	Snrpb
Plod2	Slc39a13	Snrpb2
Plscr2	Slc39a9	Snrpc
Pltp	Slc4a2	Snx1
Plvap	Slc4a3	Snx3
Plxdc2	Slc4a8	Snx4
Pmp22	Slc7a3	Snx6
Pnkd	Slc9a8	Socs6
Pnpla8	Sltm	Spast
Polr3gl	Smad5	Spcs1
Pon1	Smarcad1	Spg20
Pon2	Smarcd2	Spg21
Postn	Smc1a	Spryd3
Pou2f1	Smc3	Spryd4
Ppil4	Smc5	Sptlc1
Ppm1b	Smc6	Sqle
Ppp1cb	Smg5	Srd5a3
Ppp1r14a	Smg6	Sri
Ppp1r16b	Smpd4	Srp19
Ppp2r5a	Snhg11	Srp9
Ppp3ca	Snrnp48	Srpr
Pptc7	Snrnp70	Srprb
Prdx6	Snx11	Srrd
Prelp	Snx17	Ssbp4
Prickle1	Son	Ssna1
Prkacb	Sos1	Ssr2
Prkca	Sp2	Ssr4
Prkce	Spag1	Ssrp1
Prkch	Spen	Ssu72
Prkci	Spg7	St7
Prkcz	Srgap1	Stau1
Prkd1	Srrm2	Stk24
Prkd2	Ss18	Stoml2
Prkd3	Ssbp1	Strap
Prkg1	Ssbp2	Stt3a
Prmt2	Stag1	Stx18
Prpf8	Stap2	Sumo3
Prx	Stard3	Supv3l1
Psd3	Stk25	Surf2
Ptch1	Stk38	Sys1
Pten	Strn4	Tacstd2
Ptgfrn	Stx1a	Taf10
Ptgis	Stx3	Taf11
Ptk2	Stx4a	Taf12
Ptov1	Stx5a	Tbc1d15
Ptp4a2	Sult5a1	Tbcb
Ptpn13	Suz12	Tbcd
Ptpra	Synj2	Tbpl1
Ptprb	Synj2bp	Tbrg1
Ptprd	Taf8	Tcea1
Ptprg	Tagln3	Tcp1
Ptprm	Tardbp	Tesk2
Ptprs	Taz	Tex10
Pum1	Tbc1d10a	Tfam
Pura	Tbc1d23	Tfg
Purb	Tbl1xr1	Tgds
Pxmp4	Tbx6	Thap4
Qk	Tcf20	Thap7
Qser1	Tcf25	Thoc3
Rab11b	Tcf7l2	Thumpd3
Rab12	Tctn3	Timm13
Rab14	Tdrd3	Timm17a
Rab33b	Telo2	Timm17b
Rab5b	Terf1	Timm22
Rab6b	Terf2ip	Tipin
Rabac1	Tfb2m	Tiprl
Rabgap1l	Tgs1	Tmbim4
Rad21	Tha1	Tmed1
Rad50	Thoc2	Tmed10
Ralbp1	Thrap3	Tmed7
Ramp2	Tia1	Tmed9
Rap1a	Tial1	Tmem11
Rapgef1	Timm44	Tmem115
Rapgef3	Tle2	Tmem123
Rapgef4	Tle6	Tmem126a
Rarg	Tmc6	Tmem128
Rarres2	Tmco6	Tmem129
Rasa1	Tmem161a	Tmem147
Rasal2	Tmem191c	Tmem14c
Rasgrp2	Tmem63a	Tmem160
Rasl12	Tmem80	Tmem165
Rassf3	Tmem87a	Tmem167
Rassf8	Tmub2	Tmem168
Rb1	Tnfrsf25	Tmem183a
Rb1cc1	Tnip2	Tmem184c
Rbbp6	Tnk1	Tmem185b
Rbms1	Tnks2	Tmem186
Rbms2	Tnpo3	Tmem189
Rbp1	Tnrc18	Tmem208
Rbpms	Tnrc6a	Tmem30a
Rcan2	Tom1l2	Tmem33
Rcor1	Tomm34	Tmem38b
Rcor3	Top1	Tmem41b
Rcsd1	Top3b	Tmem45a
Rdm1	Tpr	Tmem62
Rdx	Tra2a	Tmem70
Reck	Traf7	Tmem97
Reep1	Trak1	Tmem9b
Rev3l	Trim23	Tnfrsf1a
Rftn2	Trim24	Toe1
Rgs6	Trim26	Tomm20
Rhebl1	Trim37	Tomm70a
Rhpn2	Trim39	Tor1a
Ripply3	Trim41	Tor2a
Rit1	Trip10	Tpd52l2
Rmnd5a	Trip11	Tram1
Rnase4	Trip12	Trap1
Rnf103	Trip4	Trappc1
Rnf138	Trmt2a	Trappc2
Rnf141	Trp53bp1	Trappc4
Rnf145	Trpc4ap	Trappc5
Rnf146	Trpm7	Trim13
Rnf167	Trps1	Trim16
Rnf187	Trpt1	Trmt5
Rnf214	Trrap	Trnt1
Rnf44	Tsc1	Tsg101
Rnpepl1	Tsnax	Tspan31
Robo1	Ttc13	Tspan5
Rock2	Ttc14	Ttc1
Rora	Ttc4	Ttc19
Rprd1b	Ttc5	Ttc27
Rps27	Tubgcp3	Tubg1
Rreb1	Tubgcp5	Tubgcp2
Rrm2b	Tulp1	Tusc3
Rspo1	Tyk2	Txndc12
Rsu1	Ube2o	Txndc9
Rtkn2	Ube3b	Txnl4a
Rtn1	Ube4a	U2af1
Runx1t1	Ublcp1	Uba2
Rusc2	Ubn1	Uba3
Ryk	Ubp1	Ubac2
S100g	Ubr2	Ube2a
S1pr1	Ubr3	Ube2d3
Samd4	Ubr4	Ube2e1
Sash1	Ubr5	Ube2k
Sbds	Ubxn1	Ube2v1
Scd2	Ubxn2b	Ubiad1
Scel	Ubxn6	Ubr7
Scn3a	Uckl1	Ubxn8
Scn3b	Uimc1	Uchl5
Scn7a	Unc13b	Ufc1
Scrn3	Unc45a	Ufm1
Scube2	Unk	Ufsp1
Sdc2	Upf1	Ufsp2
Sec14l4	Upf2	Usp1
Sema3a	Upf3b	Usp14
Sema3b	Usf2	Usp22
Sema3c	Ushbp1	Usp3
Sema3e	Usp11	Usp39
Sema3f	Usp16	Utp18
Sema6a	Usp19	Uxs1
Sema6d	Usp20	Uxt
Serinc1	Usp21	Vamp3
Sertad2	Usp33	Vps25
Setd3	Usp34	Vps26b
Setd7	Usp36	Vps35
Sgce	Usp45	Vps45
Sgip1	Usp48	Vps53
Sgms1	Usp49	Vta1
Sgtb	Usp53	Wfs1
Sh2d3c	Usp7	Wtap
Sh3bgrl	Usp8	Xrcc2
Sh3bp4	Utp6	Yeats4
Sh3bp5l	Vamp2	Yif1a
Sh3d19	Vps11	Yipf1
Sh3gl2	Vps33b	Yipf5
Sh3glb1	Vps37a	Yme1l1
Sh3rf1	Vps37b	Zbtb7b
Shank3	Vps54	Zc3h14
She	Vsig2	Zc3hc1
Shprh	Wbp2	Zcchc10
Sigirr	Wdr13	Zdhhc12
Sirt1	Wdr26	Zdhhc16
Ski	Wdr33	Zdhhc4
Slc12a5	Wdr90	Zdhhc5
Slc12a6	Wiz	Zdhhc6
Slc16a11	Wrn	Zfp277
Slc16a7	Xab2	Zfp64
Slc19a3	Xpa	Zfp830
Slc1a1	Xpo7	Zmat5
Slc1a3	Xpot	Znhit1
Slc22a23	Xrcc1	Znhit3
Slc22a5	Ylpm1	Zswim1
Slc25a36	Ythdc1
Slc25a42	Ythdf3
Slc29a1	Zbtb37
Slc30a1	Zbtb48
Slc35a5	Zbtb7a
Slc38a5	Zc3h18
Slc39a3	Zc3h3
Slc43a3	Zc3h7a
Slc44a1	Zc3h8
Slc44a3	Zcchc7
Slc48a1	Zcchc8
Slc4a4	Zcchc9
Slc6a4	Zdhhc1
Slc6a9	Zdhhc20
Slc7a10	Zdhhc8
Slc9a3r2	Zfand5
Slit2	Zfp1
Slit3	Zfp101
Slmap	Zfp110
Slu7	Zfp14
Smad4	Zfp142
Smad6	Zfp160
Smad7	Zfp235
Smarca2	Zfp26
Smpdl3a	Zfp276
Sncaip	Zfp28
Snrk	Zfp280c
Snx14	Zfp282
Snx21	Zfp287
Socs7	Zfp316
Sod1	Zfp318
Sorbs1	Zfp326
Sorbs3	Zfp329
Sorl1	Zfp369
Sos2	Zfp395
Sox13	Zfp397
Sox18	Zfp398
Sox5	Zfp40
Sox7	Zfp426
Sp1	Zfp445
Sp4	Zfp451
Sparcl1	Zfp53
Spata6	Zfp574
Spns1	Zfp598
Spns2	Zfp617
Spon1	Zfp62
Spop	Zfp622
Sppl3	Zfp639
Spred2	Zfp7
Srpk2	Zfp707
Srr	Zfp740
Ssbp3	Zfp768
Sspn	Zfp771
St3gal2	Zfp777
St3gal6	Zfp81
St6galnac2	Zfp821
Stag2	Zfpl1
Stard13	Zfr
Stard8	Zfr2
Stat5b	Zfyve19
Stim1	Zfyve26
Stk11	Zfyve27
Stmn1	Zkscan3
Stmn2	Zmiz2
Strn3	Zmym3
Stxbp1	Znrf1
Stxbp6	Zranb2
Sult1a1	Zscan21
Surf1	Zw10
Susd4	Zzz3
Svil
Swap70
Syf2
Syne1
Syne2
Sypl
Sytl2
Tacc2
Tagln2
Tal1
Tanc1
Taok1
Tbcel
Tbx2
Tbx3
Tbx4
Tbx5
Tbxa2r
Tceal1
Tcf12
Tcf21
Tcf4
Tcn2
Tead1
Tek
Tet1
Tgfa
Tgfb2
Tgfbr3
Thbd
Thbs3
Thra
Thrb
Thsd1
Tie1
Tigd5
Timp2
Tjp1
Tk2
Tle1
Tle4
Tln1
Tm4sf1
Tmcc2
Tmcc3
Tmeff1
Tmem100
Tmem106b
Tmem109
Tmem119
Tmem159
Tmem47
Tmem50b
Tmem59
Tmod1
Tmod2
Tmod3
Tmsb4x
Tnfrsf19
Tnrc6b
Tnrc6c
Tns1
Tnxb
Tob2
Top2b
Topors
Tpcn1
Tppp3
Tprgl
Tpst1
Tpst2
Traf5
Trappc6a
Trib2
Trim2
Trim33
Trim35
Trim44
Trim62
Trim8
Trpc1
Trpc3
Trpc6
Tsc2
Tshz1
Tspan12
Tspan13
Tspan17
Tspan2
Tspan7
Tspyl1
Tspyl4
Tsr2
Ttbk2
Ttc28
Ttc3
Ttc33
Ttc7b
Ttl
Twsg1
Txndc16
Txnip
Ube2b
Ube3a
Ubl3
Ubr1
Ubtf
Ubxn2a
Ulk1
Ulk2
Unc50
Use1
Utrn
Uvrag
Vamp4
Vamp5
Vangl2
Vcl
Vegfa
Vldlr
Vps36
Vsnl1
Vtn
Wasf2
Wasf3
Wasl
Wbp4
Wdfy3
Wdr45
Wdr48
Wfdc1
Wnk1
Wnt10b
Wnt2
Wnt3a
Wrnip1
Wwc1
Wwc2
Wwp1
Wwtr1
Xiap
Xpc
Xpr1
Xrn1
Yap1
Yes1
Yipf4
Ypel3
Ythdf1
Yy1
Zbtb1
Zbtb20
Zbtb44
Zbtb46
Zcchc14
Zcchc3
Zdhhc14
Zdhhc3
Zeb1
Zfhx3
Zfp105
Zfp113
Zfp148
Zfp189
Zfp2
Zfp212
Zfp260
Zfp275
Zfp292
Zfp30
Zfp322a
Zfp354c
Zfp358
Zfp503
Zfp532
Zfp612
Zfp644
Zfp654
Zfp68
Zfp697
Zfp704
Zfp758
Zfp764
Zfp84
Zfx
Zfyve21
Zhx1
Zkscan14
Zmiz1
Zmym5
Zmynd11
Zranb1
Zrsr1
Zyx
