# Supplementary material for: Single-Walled vs. Multi-Walled Carbon Nanotubes: Influence of Physico-Chemical Properties on Toxicogenomics Responses in Mouse Lungs
Source: Nanomaterials (Basel). 2023 Mar 15;13(6):1059. doi: 10.3390/nano13061059 (PMC10057402; doi:10.3390/nano13061059)
Supplement: Supplementary file 1 [file nanomaterials-13-01059-s001.zip › Table S11.xlsx]

## Sheet: 11a. Biological functions
Table S11. Enrichment analysis for the top 10 biological functions for each module.
Table S11a. Enrichment analysis for the top 10 biological functions for each module performed through DAVID bioinformatics and IPA software.
DAVID Bioinformatics						IPA software
Module 1
						Module 1
Biological processes	FDR	Molecular functions	FDR	KEGG pathways	FDR	Canonical pathways	-log (p-value)	Upstream regulators	Molecule type	P-value of overlap	Diseases and disorders	Molecular and cellular functions
Angiogenesis	4.19039e-17	Protein binding	1.08363e-35	Rap1 signaling pathway	2.75788e-14	Cardiac hypertrophy signaling	19.6	TGFB1	Growth factor	1.34e-21	Cancer	Cellular movement
Positive regulation of transcription from RNA polymerase II promoter	3.40527e-15	Metal ion binding	4.77975e-09	Focal adhesion	1.38539e-12	Axonal guidance signaling	16.292	TP53	Transcription regulator	9.37e-20	Organismal injury and abnormalities	Gene expression
Negative regulation of transcription from RNA polymerase II promoter	7.31494e-13	Transcription factor activity, sequence-specific DNA binding	6.78766e-09	Pathways in cancer	1.38539e-12	Hepatic fibrosis signaling pathway	14.69	ESR1	Ligand-independent nuclear receptor	3.26e-19	Endocrine system disorders	Cell death and survival
Transcription, DNA-templated	9.29737e-11	Protein kinase activity	8.17607e-09	Ras signaling pathway	1.13136e-07	Molecular mechanisms of cancer	14.471	AGT	Growth factor	3.23e-18	Gastrointestinal disease	Cellulary assembly and organization
Regulation of transcription, DNA-templated	2.88699e-10	Kinase activity	8.28363e-08	Axon guidance	1.13136e-07	RAR activation	13.167	SOX2	Transcription regulator	3.42e-18	Neurological disease	Cellular function and maintenance
Protein phosphorylation	1.50606e-09	Transcription factor binding	8.28363e-08	cGMP-PKG signaling pathway	4.98832e-07	Thrombin signaling	12.141	TNF	Cytokine	1.14e-15
Intracellular signal transduction	9.02048e-09	Enzyme binding	1.69173e-06	Proteoglycans in cancer	8.8781e-07	Human embryonic stem cell pluripotency	11.339	TCF7L2	Transcription regulator	2.88e-13
Positive regulation of transcription, DNA-templated	4.90038e-08	Growth factor binding	1.49503e-05	MAPK signaling pathway	9.75958e-07	HER-2 signaling in breast cancer	11.16	CTNNB1	Transcription regulator	1.74e-12
Phosphorylation	5.62931e-08	Protein serine/threonine kinase activity	2.12312e-05	PI3K-Akt signaling pathway	1.03611e-06	Factors promoting cardiogenesis in vertebrates	11.128	ERG	Transcription regulator	1.8e-12
Positive regulation of cell proliferation	5.28497e-07	Actin binding	3.82715e-05	Gap junction	1.89808e-06	Gap junction signaling	11.024	ERBB2	Kinase	7.05e-11
Module 2
						Module 2
Biological processes	FDR	Molecular functions	FDR	KEGG pathways	FDR	Canonical pathways	-log (p-value)	Upstream regulators	Molecule type	P-value of overlap	Diseases and disorders	Molecular and cellular functions
Transcription, DNA-templated	4.22782e-25	Poly(A) RNA binding	7.73469e-22	Spliceosome	0.00725485	Apoptosis signaling	4.417	HNF4A	Transcription regulator	2.06e-07	Cancer	Gene expresion
Regulation of transcription, DNA-templated	3.61726e-18	Chromatin binding	5.01092e-19	mRNA surveillance pathway	0.0119522	Death receptor signaling	4.215	MMP3	Peptidase	4.72e-06	Endocrine system disorders	RNA post-transcriptional modification
Covalent chromatin modification	7.58143e-11	DNA binding	1.47781e-14	Ubiquitin mediated proteolysis	0.0184446	ATM signaling	4.165	ESR1	Ligand-dependent nuclear receptor	5.25e-05	Organismal injury and abnormalities	Post-translational modification
mRNA processing	1.11722e-10	RNA binding	2.4752e-13	Phosphatidylinositol signaling system	0.0244383	Senescence pathway	4.035	TCOF1	Transporter	6.85e-05	Gastrointestinal disease	Cell cycle
RNA splicing	2.48653e-08	Nucleotide binding	2.83209e-11	Acute myeloid leukemia	0.0391052	Pyridoxal 5'phosphate salvage pathway	3.963	mir-210	microRNA	0.00035	Neurological disease	Cellular assembly and organization
Positive regulation of transcription from RNA polymerase II promoter	6.43382e-07	Nucleic acid binding	2.21388e-10			Autophagy	3.86	MYCL	Transcription regulator	0.000442
DNA repair	7.43274e-06	Protein binding	3.95493e-10			Protein Ubiquitination Pathway	3.81	CST5	Other	0.000746
Ubiquitin-dependent protein catabolic process	2.77995e-05	Zinc ion binding	3.95493e-10			Telomere extension by Telomerase	3.514	LMNA	Other	0.000756
Protein phosphorylation	4.57946e-05	Metal ion binding	1.14648e-09			NGF signaling	3.256	TOB1	Transcription regulator	0.00121
Cellular response to DNA damage stimulus	4.93976e-05	Helicase activity	1.38068e-06			PPARa/RXRa activation	3.157	ATR	Kinase	0.00123
Module 3						Module 3
Biological processes	FDR	Molecular functions	FDR	KEGG pathways	FDR	Canonical pathways	-log (p-value)	Upstream regulators	Molecule type	P-value of overlap	Diseases and disorders	Molecular and cellular functions
Protein transport	5.73463e-21	Poly(A) RNA binding	7.49908e-17	Proteasome	6.61999e-17	FAT10 signaling pathway	22.403	HNF4A	Transcription regulator	1.57e-30	Cancer	Protein synthesis
Translation	8.27341e-13	Structural constituent of ribosome	1.69681e-14	Ribosome	2.94868e-09	Polyamine regulation in colon cancer	20.924	XBP1	Transcription regulator	1.3e-14	organismal injury and abnormalities	DNA replicaction, recombination, and repair
Vesicle-mediated transport	2.40698e-08	Hydrolase activity	5.96388e-09	RNA transport	2.15868e-06	BAG2 signaling pathway	20.177	UBQLN2	Other	4.61e-14	Infectious diseases	Post-translational modification
Mitochondrial translation	2.33068e-07	Threonine-type endopeptidase activity	3.35351e-07	Spliceosome	3.54704e-05	Inhibiton of ARE-mediated mRNA degradation pathway	17.38	RICTOR	Other	1.76e-10	Tumor morphology	RNA post-transcriptional modification
Transport	2.78007e-06	RNA binding	2.59089e-06	Pyrimidine metabolism	6.28234e-05	Huntington's disease signaling	15.298	NFE2L1	Transcription regulator	2.7e-07	Endocrine system disorders	Cell death and survival
Cullin deneddylation	6.99593e-06	Unfolded protein binding	3.54895e-05	RNA polymerase	8.63729e-05	Nucleotide excision repair (Enhanced pathway)	14.376	HSF2	Transcription regulator	2.7e-07
Antigen processing and presentation of exogenous peptide antigen via MHC class I, TAP-dependent	2.13382e-05	DNA-directed RNA polymerase activity	3.54895e-05	Nucleotide excision repair	0.000524348	Protein Ubiquitination Pathway	14.287	G protein alpha	Group	1.87e-06
ER to Golgi vesicle-mediated transport	3.40132e-05	Proteasome-activating ATPase activity	0.000128611	Basal transcription factors	0.00262692	Assembly of RNA polymerase II complex	12.428	MAP4K4	Kinase	1.92e-06
mRNA processing	6.46016e-05	TBP-class protein binding	0.000227873	Metabolic pathways	0.00262692	Nucleotide excision repair pathway	11.77	CST5	Other	5.58e-06
ER-associated ubiquitin-dependent protein catabolic process	7.41549e-05	GTP binding	0.000282619	:Biosynthesis of antibiotics	0.00518139	Spliceosomal cycle	9.314	RAB1B	Other	7.57e-06
Module 4						Module 4
Biological processes	FDR	Molecular functions	FDR	KEGG pathways	FDR	Canonical pathways	-log (p-value)	Upstream regulators	Molecule type	P-value of overlap	Diseases and disorders	Molecular and cellular functions
Ion transport	4.75381e-24	Ion channel activity	2.39452e-18	Neuroactive ligand-receptor interaction	1.09304e-28	CREB signaling pathway	17.564	REST	Transcription regulator	8.52e-18	Dermatological diseases and conditions	Cell to Cell signaling and interaction
Chemical synaptic transmission	1.81995e-11	Extracellular ligand-gated ion channel activity	1.89797e-14	Nicotine addiction	6.86117e-12	Breast cancer regulation by stathmin1	10.676	DTNBP1	Other	7.34e-10	Organismal injury and abnormalities	Molecular transport
Regulation of membrane potential	1.01613e-07	Signal transducer activity	3.06062e-09	Serotonergic synapse	6.40859e-06	Calcium signaling	9.511	POU4F1	Transcription regulator	5.04e-09	Cancer	Cellular development
Nervous system development	4.71817e-07	Calcium ion binding	1.16929e-07	Retrograde endocannabinoid signaling	9.65582e-05	GABA receptor signaling	9.027	CREB1	Transcription regulator	8.79e-09	Neurological disease	Cellular growth and proliferation
Transmembrane transport	5.13837e-07	Chloride channel activity	8.30558e-07	Morphine addiction	0.000114433	Amyotrophic lateral sclerosis signaling	8.272	SNCA	Enzyme	1.24e-08	Psychological disordears	Small molecule biochemistry
Sodium ion transport	6.19494e-07	Voltage-gated ion channel activity	3.83155e-06	GABAergic synapse	0.000236661	cAMP-mediated signaling	7.616	TLX3	Transcription regulator	1.28e-08
Signal transduction	1.32388e-06	GABA-A receptor activity	4.44568e-06	Calcium signaling pathway	0.00393639	Glutamate receptor signaling	6.102	LHX1	Transcription regulator	1.54e-08
Locomotory behavior	1.04438e-05	Extracellular-glutamate-gated ion channel activity	4.28193e-05	Circadian entrainment	0.0124562	Phototransduction pathway	6.039	NEUROG3	Transcription regulator	1.35e-07
Regulation of ion transmembrane transport	1.04438e-05	Ionotropic glutamate receptor activity	4.28193e-05	Dopaminergic synapse	0.0145602	Serotonin receptor signaling	5.963	DSCAM	Other	1.22e-06
Sensory perception of sound	1.34797e-05	Acetylcholine-activated cation-selective channel activity	4.28193e-05	cAMP signaling pathway	0.0231195	Synaptogenesis signaling pathway	5.767	ISL1	Transcription regulator	1.97e-06
Module 5						Module 5
Biological processes	FDR	Molecular functions	FDR	KEGG pathways	FDR	Canonical pathways	-log (p-value)	Upstream regulators	Molecule type	P-value of overlap	Diseases and disorders	Molecular and cellular functions
rRNA processing	6.3625e-15	Poly(A) RNA binding	1.92379e-43	Ribosome biogenesis in eukaryotes	6.83581e-08	tRNA charging	10.556	MYC	Transcription regulator	1.36e-17	Cancer	RNA post-transcriptional modification
Ribosome biogenesis	3.68919e-14	RNA binding	1.15069e-13	RNA transport	9.35935e-06	Sirtuin signaling pathway	6.247	PHF12	Transcription regulator	1.02e-16	Organismal injury and abnormalities	Molecular transport
Protein transport	2.70568e-09	Nucleotide binding	8.02534e-09	Aminoacyl-tRNA biosynthesis	0.000520032	DNA double-strand break repair by non-homologous end joining	5.644	EIF2AK3	Kinase	1.11e-13	Endocrine system disorders	Protein trafficking
Ribosomal large subunit biogenesis	5.70871e-09	Aminoacyl-tRNA ligase activity	5.17035e-07	Protein processing in endoplasmic reticulum	0.00175505	Telomere extension by telomerase	5.474	CST5	Other	2.92e-12	Gastrointestinal disease	Cellular development
tRNA aminoacylation for protein translation	0.000142982	snoRNA binding	1.05656e-06	Pyrimidine metabolism	0.0117402	Huntington's disease signaling	4.629	IL4	Cytokine	6e-10	Infectious diseases	Cellular growth and proliferation
Maturation of SSU-rRNA from tricistronic rRNA transcript (SSU-rRNA, 5.8S rRNA, LSU-rRNA)	0.00026832	Cadherin binding involved in cell-cell adhesion	0.000393783			Hypoxia signaling in the cardiovascular system	4.48	ERBB2	Kinase	7.76e-09
Maturation of LSU-rRNA	0.000307026	ATP binding	0.000475675			FAT10 signaling pathway	4.397	TGFB1	Growth factor	4.68e-08
Translation	0.000428329	tRNA binding	0.000505433			Protein Ubiquitination pathway	4.165	NME1	Kinase	6.4e-08
mRNA transport	0.00179255	Methyltransferase activity	0.000505433			Ferroptosis signaling pathway	3.556	ESR2	Ligand-dependent nuclear receptor	1.64e-07
Translational initiation	0.00179255	Ligase activity	0.0239274			Inhibition of ARE-mediated mRNA degradation pathway	3.399	TP53	Transcription regulator	1.78e-06
Module 6						Module 6
Biological processes	FDR	Molecular functions	FDR	KEGG pathways	FDR	Canonical pathways	-log (p-value)	Upstream regulators	Molecule type	P-value of overlap	Diseases and disorders	Molecular and cellular functions
Cell cycle	6.60854e-63	ATP binding	8.02597e-12	Cell cycle	1.08175e-27	Kinetochore metaphase signaling pathway	27.669	E2F4	Transcription regulator	6.37e-74	Cancer	Cell cycle
Cell division	3.17305e-42	Nucleotide binding	6.91389e-10	DNA replication	3.21356e-21	Cell cycle control of chromosomal replication	25.026	CDKN1A	kinase	7.92e-61	Hematological disease	Cellular assembly and organization
Mitotic nuclear division	2.51807e-35	Single-stranded DNA-dependent ATPase activity	3.15045e-08	Mismatch repair	2.00922e-08	Role of BRCA1 in DNA damage response	18.292	CEBPB	transcription regulator	3.02e-60	Immunological disease	DNA replicaction, recombination, and repair
DNA replication	1.97743e-26	Protein binding	3.0204e-06	Pyrimidine metabolism	1.5799e-07	Cell cycle: G2/M DNA damage checkpoint regulation	15.171	TP53	transcription regulator	2.9e-58	Organismal injury and abnormalities	Cell death and survival
Chromosome segregation	6.848e-14	Single-stranded DNA binding	3.24384e-06	Fanconi anemia pathway	3.81995e-06	Estrogen-mediated S-phase entry	13.203	E2F1	transcription regulator	1.72e-50	Reproductive system disease	Cell morphology
Cellular response to DNA damage stimulus	2.51721e-13	Kinase activity	6.62451e-06	p53 signaling pathway	5.03772e-06	Mitotic roles of polo-like kinase	11.907	RABL6	other	9.92e-50
DNA repair	3.7423e-13	Transferase activity	6.62451e-06	Nucleotide excision repair	8.03689e-06	Cyclins and cell cycle regulation	11.558	ERBB2	kinase	1.28e-49
DNA replication initiation	7.67961e-13	Microtubule binding	9.69694e-06	Oocyte meiosis	1.88849e-05	Role of CHK proteins in cell cycle checkpoint	11.53	TBX2	transcription regulator	1.91e-48
Mitotic cytokinesis	5.05492e-07	Protein kinase binding	2.329e-05	Base excision repair	0.000149421	Nucleotide excision repair, enhanced pathway	11.317	RB1	transcription regulator	1.67e-44
Mitotic sister chromatid segregation	9.39867e-07	DNA helicase activity	2.62995e-05	Progesterone-mediated oocyte maturation	0.000298617	Hereditary breast cancer signaling	11.112	CCND1	transcription regulator	7.25e-43
Module 7						Module 7
Biological processes	FDR	Molecular functions	FDR	KEGG pathways	FDR	Canonical pathways	-log (p-value)	Upstream regulators	Molecule type	P-value of overlap	Diseases and disorders	Molecular and cellular functions
Oxidation-reduction process	9.90288e-20	Structural constituent of ribosome	3.30028e-12	Oxidative phosphorylation	6.31979e-38	Mitochondrial dysfunction	47.462	RICTOR	Other	2.26e-43	Developmental disorder	Cell signaling
Transport	7.95509e-11	NADH dehydrogenase (ubiquinone) activity	8.46603e-11	Parkinson's disease	8.49898e-37	Oxidative phosphorylation	45.248	TLE3	Other	2.5e-39	Hereditary disorder	Post-translational modification
Translation	3.0974e-06	Cytochrome-c oxidase activity	6.77015e-06	Huntington's disease	1.26334e-32	Sirtuin signaling pathway	20.975	CAB39L	Kinase	8.2e-31	Metabolic disease	Protein synthesis
ATP synthesis coupled proton transport	0.000122539	Lyase activity	0.00132222	Alzheimer's disease	5.0253e-31	Estrogen receptor signaling	10.777	KDM5A	Transcription regulator	5.89e-24	Organismal injury and abnormalities	RNA damage and repair
Proton transport	0.000229508	Proton-transporting ATP synthase activity, rotational mechanism	0.00189676	Non-alcoholic fatty liver disease (NAFLD)	2.8027e-24	Glucocorticoid receptor signaling	8.116	HBA1/HBA2	Transporter	1.77e-23	Cancer	Cell death and survival
ATP metabolic process	0.00254716	Catalytic activity	0.00364547	Metabolic pathways	4.59059e-17	EIF2 signaling	7.123	CPT1B	Enzyme	6.89e-22
		Poly(A) RNA binding	0.00601139	Ribosome	6.97491e-12	Coronavirus pathogenesis pathway	3.148	PRKCG	Kinase	9.47e-21
		Oxidoreductase activity	0.00601139	Cardiac muscle contraction	0.000251	Regulation of eIF4 and p7056K signaling	2.879	DDX5	Enzyme	4.99e-20
		NADH dehydrogenase activity	0.0218093			mTOR	2.423	SEL1L	Other	4.87e-17
		Electron carrier activity	0.0218093			Nucleotide excision repair, enhance pathway	2.124	Hbb-b1	Transporter	7.34e-17
Module 8						Module 8
Biological processes	FDR	Molecular functions	FDR	KEGG pathways	FDR	Canonical pathways	-log (p-value)	Upstream regulators	Molecule type	P-value of overlap	Diseases and disorders	Molecular and cellular functions
Cilium assembly	1.35417e-12			Metabolism of xenobiotics by cytochrome P450	0.0161409	Glutathione-mediated detoxification	4.417	CX3CR1	G-protein coupled receptor	1.12e-05	Developmental disorder	Cell morphology
Cilium morphogenesis	9.58605e-12					Aldosterone signaling in epithelial cells	2.488	FOXA2	Transcription regulator	0.000208	Cancer	Cellular assembly and organization
Cell projection organization	1.46275e-08					NRF2-mediated oxidative stress response	2.156	FOXD3	Transcription regulator	0.000363	Organismal injury and abnormalities	Cellular function and maintenance
Determination of left/right symmetry	0.00161005					Ovarian cancer signaling	1.963	HTR6	G-protein coupled receptor	0.00044	Hereditary disorder	Cellular movement
Intraciliary transport	0.00347535					Aryl Hydrocarbon receptor signaling	1.951	NEDD9	Other	0.000729	Neurological disease	Cell signaling
Dorsal/ventral pattern formation	0.00474347					Role of NANOG in mammalian embryonic stem cell pluripotency	1.87	SPINT1	Other	0.000731
						Xenobiotic metabolism PXR signaling pathway	1.588	AKR1C3	Enzyme	0.000874
						LPS/IL-1 mediated inhibition of RXR function	1.533	SSTR3	G-protein coupled receptor	0.000874
						Human embryonic stemm cell pluripotency	1.338	ULK4	Kinase	0.00202
								NKX2-1	Transcription regulator	0.00215
Module 9						Module 9
Biological processes	FDR	Molecular functions	FDR	KEGG pathways	FDR	Canonical pathways	-log (p-value)	Upstream regulators	Molecule type	P-value of overlap	Diseases and disorders	Molecular and cellular functions
Carbohydrate metabolic process	2.2e-06	Hydrolase activity	2.4e-09	Lysosome	7.4e-32	Phagosome maturation	10.573	TCL1A	Transcription regulator	1.4e-23	Developmental disorder	Cellular compromise
Lysosome organization	7e-06	Hydrolase activity, acting on glycosyl bonds	1.1e-08	Other glycan degradation	9.9e-09	Role of MAPK signaling in promoting the pathogenesis of influenza	5.967	TFEB	Transcription regulator	1.83e-20	Hereditary disorder	Carbohydrate metabolism
Metabolic process	3.2e-05	Hydrolase activity, hydrolyzing O-glycosyl compounds	9.2e-07	Rheumatoid arthritis	3.1e-06	Phagosome formation	4.943	IL10	Cytokine	3.02e-19	Metabolic disease	Cellular movement
Lipid metabolic process	9.4e-05	Peptidase activity	0.014	Glycosaminoglycan degradation	0.00059	Iron homeostasis signaling pathway	4.305	TGFB1	Growth factor	7.79e-16	Organismal injury and abnormalities	Cell morphology
Endocytosis	0.0018	Carbohydrate binding	0.014	Synaptic vesicle cycle	0.0015	Granulocyte adhesion and diapedesis	4.131	CSF1	Cytokine	1.31e-13	Inflammatory response	Cell-to-cell signaling and interaction
Transport	0.003	Fibronectin binding	0.014	Collecting duct acid secretion	0.0015	Role of pattern recognition receptors in recognition of bacteria and viruses	3.951	IL13	Cytokine	1.78e-13
N-acetylneuraminate catabolic process	0.0052	Catalytic activity	0.014	Sphingolipid metabolism	0.0022	Colorectal cancer metastasis signaling	3.64	APOE	Transporter	1.88e-13
Lipid catabolic process	0.0055	Carboxypeptidase activity	0.025	Amino sugar and nucleotide sugar metabolism	0.0022	Tumor microenvironment pathway	3.544	OGA	Enzyme	2.48e-11
Ganglioside catabolic process	0.007			Phagosome	0.0066	Osteoarthritis pathway	3.435	IL1B	Cytokine	3.45e-11
Collagen catabolic process	0.018			Glycosphingolipid biosynthesis - globo series	0.023	Eicosanoid signaling	3.391	IL4	Cytokine	1.06e-10
Module 10						Module 10
Biological processes	FDR	Molecular functions	FDR	KEGG pathways	FDR	Canonical pathways	-log (p-value)	Upstream regulators	Molecule type	P-value of overlap	Diseases and disorders	Molecular and cellular functions
Inflammatory response	1.4e-18	Cytokine activity	2.3e-14	Cytokine-cytokine receptor interaction	6.3e-12	Granulocyte adhesion and diapedesis	21.91	TNF	Cytokine	3.19e-54	Inflammatory response	Cellular movement
Immune response	8.7e-10	Chemokine activity	1.1e-10	TNF signaling pathway	1.2e-06	Agranulocyte adhesion and diapedesis	18.072	IL1B	Cytokine	4.48e-47	Organismal injury and abnormalities	Cell-to-cell signaling and interaction
Chemokine-mediated signaling pathway	1.4e-09	Growth factor activity	0.0081	Salmonella infection	3e-06	Acute phase response signaling	15.64	IL17A	Cytokine	1.03e-39	Gastrointestinal disease	Cellular growth and proliferation
Cell chemotaxis	2.8e-09			Rheumatoid arthritis	3.6e-06	IL-10 signaling	15.625	NFKB	Complex	5.45e-38	Inflammatory response	Cellular development
Cellular response to interleukin-1	6e-08			NOD-like receptor signaling pathway	1.9e-05	IL-17 signaling	14.337	IFNG	Cytokine	3.12e-36	Connective tissue disorders	Cell death and survival
Chemotaxis	2.7e-07			Malaria	6.4e-05	LXR/RXR activation	13.553	IL1A	Cytokine	2.6e-35
Positive regulation of ERK1 and ERK2 cascade	5.2e-07			NF-kappa B signaling pathway	9.6e-05	Role of macrophages, fibroblasts and endothelial cells in rheumatoid arthritis	12.182	IL6	Cytokine	1.05e-34
Monocyte chemotaxis	5.2e-07			Legionellosis	0.00016	Hepatic cholestasis	11.924	TLR4	Transmembrane receptor	3.44e-33
Neutrophil chemotaxis	2.4e-06			Pertussis	0.00067	IL-6 signaling	10.78	IL4	Cytokine	9.32e-33
Lymphocyte chemotaxis	2.7e-06			Chemokine signaling pathway	0.00067	Role of osteoblasts, osteoclasts, and chondrocytes in rheumatoid arthritis	9.754	IL10	Cytokine	1.03e-32
Module 11						Module 11
Biological processes	FDR	Molecular functions	FDR	KEGG pathways	FDR	Canonical pathways	-log (p-value)	Upstream regulators	Molecule type	P-value of overlap	Diseases and disorders	Molecular and cellular functions
Inflammatory response	5.5e-11	Protein binding	5.5e-06	TNF signaling pathway	2.2e-14	Acute phase response signaling	14.644	TNF	Cytokine	4.64e-52	Immunological disease	Cell death and survival
Response to lipopolysaccharide	1.2e-09			NF-kappa B signaling pathway	4.1e-06	Tumor microenvironment pathway	12.485	IL1B	Cytokine	1.01e-46	Connective tissue disorders	Cellular movement
Cellular response to lipopolysaccharide	2.3e-06			Leishmaniasis	7.1e-06	IL-6 signaling	12.192	IFNG	Cytokine	2.59e-44	Inflammatory disease	Cellular function and maintenance
Negative regulation of cell proliferation	3e-06			Toll-like receptor signaling pathway	3.1e-05	JAK/Stat signaling	12.058	NFKB(Complex)	Complex	1.45e-38	Organismal injury and abnormalities	Cellular development
Response to cytokine	1.1e-05			Measles	5.2e-05	TNFR2 signaling	11.917	NFKBIA	Transcription regulator	1.24e-32	Skeletal and muscular disorders	Cellular growth and proliferation
Positive regulation of apoptotic process	1.1e-05			Influenza A	6.5e-05	CD40 signaling	11.666	STAT3	Transcription regulator	5.82e-32
Positive regulation of cell death	4e-05			Osteoclast differentiation	0.00013	Coronavirus pathogenesis pathway	11.64	CSF2	Cytokine	7.16e-32
Cellular response to interleukin-1	8.6e-05			Chagas disease (American trypanosomiasis)	0.00016	Hepatic fibrosis signalingh pathway	11.313	MYD88	Other	4.41e-31
Cellular response to tumor necrosis factor	8.6e-05			Cytosolic DNA-sensing pathway	0.00033	IL-10 signaling	11.308	IL6	Cytokine	6.56e-31
Negative regulation of apoptotic process	8.6e-05			Hepatitis B	0.00034	Death receptor signaling	11.22	CD40LG	Cytokine	1.04e-30
Module 12						Module 12
Biological processes	FDR	Molecular functions	FDR	KEGG pathways	FDR	Canonical pathways	-log (p-value)	Upstream regulators	Molecule type	P-value of overlap	Diseases and disorders	Molecular and cellular functions
Cardiac muscle contraction	2.9e-12	structural constituent of cytoskeleton	0.00011	Dilated cardiomyopathy	2.4e-09	Dilated cardiomyopathy signaling pathway	11.836	MEF2C	Transcription regulator	1.9e-25	Cardiovascular disease	Cell morphology
Muscle contraction	2.9e-12	Actin binding	0.0002	Cardiac muscle contraction	9e-09	Calcium signaling	11.719	STAT5B	Transcription regulator	3.81e-20	Hereditary disorder	Cellular assembly and organization
Sarcomere organization	7.8e-10	Cytoskeletal protein binding	0.0002	Hypertrophic cardiomyopathy (HCM)	9e-09	Epithelial adherens junction signaling	4.876	Bvht	Other	1.27e-19	Organismal injury and abnormalities	Cellular function and maintenance
Regulation of heart rate	3.7e-06	Calcium ion binding	0.00067	Adrenergic signaling in cardiomyocytes	3.6e-05	Actin cytoskeleton signaling	4.312	TBX5	Transcription regulator	1.47e-17	Skeletal and muscular disorders	Cellular development
Regulation of muscle contraction	4.9e-06	Muscle alpha-actinin binding	0.0022	PPAR signaling pathway	0.03	Apelin cardiomyocyte signaling pathway	4.216	DMD	Other	9.59e-17	Development disorder	Cellular growht and proliferation
Regulation of heart contraction	1.2e-05	Structural constituent of muscle	0.017			ILK signaling	4.177	BSCL2	Other	9.16e-16
Ventricular cardiac muscle tissue morphogenesis	1.3e-05	Troponin T binding	0.02			Hepatic fibrosis/hepatic stellate cell activation	3.419	HAND2	Transcription regulator	1.4e-15
Brown fat cell differentiation	3.8e-05	Ion channel binding	0.024			Protein Kinase A signaling	3.343	MYOCD	Transcription regulator	4.61e-15
Regulation of the force of heart contraction	0.00011	Actin filament binding	0.035			Agranulocyte adhesion and diapedesis	3.166	NOS2	Enzyme	3.53e-14
Cellular calcium ion homeostasis	0.00017	Telethonin binding	0.035			PAK signaling	2.866	DNMT3B	Enzyme	1.61e-13
Module 13						Module 13
Biological processes	FDR	Molecular functions	FDR	KEGG pathways	FDR	Canonical pathways	-log (p-value)	Upstream regulators	Molecule type	P-value of overlap	Diseases and disorders	Molecular and cellular functions
No biological processes with FDR < 0.05		No molecular functions with FDR<0.05		p53 signaling pathway	1.3e-05	p53 signaling	8.941	TP53	Transcription regulator	3.65e-18	Cancer	Cell morphology
						Myc mediated apoptosis signaling	4.68	CDK19	Kinase	1.2e-17	Organismal injury and abnormalities	Cellular function and maintenance
						PI3K/AKT signaling	4.22	AURK	Group	6e-11	Endocrine system disorders	Cell death and survival
						Apoptosis signaling	3.169	ANLN	Other	6e-11	Gastrointestinal disease	Cellular response to therapeutics
						Aryl Hydrocarbon receptor signaling	3.145	NRAS	Enzyme	2.28e-10	Developmental disorder	Cellular growth and proliferation
						Chronic myeloid leukemia signaling	3.112	GAS2L3	Other	7.83e-10
						Molecular mechanisms of cancer	3.069	TP63	Transcription regulator	1.28e-09
						Prostate cancer signaling	3.023	CHEK2	Kinase	1.8e-09
						Glioma signaling	2.827	SLC29A1	Transporter	2.61e-09
Module 14						Module 14
Biological processes	FDR	Molecular functions	FDR	KEGG pathways	FDR	Canonical pathways	-log (p-value)	Upstream regulators	Molecule type	P-value of overlap	Diseases and disorders	Molecular and cellular functions
Adaptive immune response	9.2e-16	Chemokine receptor activity	4.9e-05	Primary immunodeficiency	7.2e-12	Th1 and Th2 activation pathway	20.327	IL2	Cytokine	1.37e-35	Inflammatory response	Cellular development
Immune system process	9.2e-16	Protein binding	4.9e-05	Hematopoietic cell lineage	3.1e-11	Th1 pathway	14.654	IL4	Cytokine	2.91e-31	Endocrine system disorders	Cellular growth and proliferation
T cell receptor signaling pathway	5.8e-08	Protein kinase activity	0.0012	T cell receptor signaling pathway	2.4e-10	Th2 pathway	13.889	TCR	Complex	2.9e-27	Gastrointestinal disease	Cell-to-cell signaling and interaction
Negative thymic T cell selection	1.3e-07	Non-membrane spanning protein tyrosine kinase activity	0.0012	Cytokine-cytokine receptor interaction	3.8e-07	Primary immunodeficiency signaling	13.394	TCF3	Transcription regulator	1.2e-24	Immunological disease	Cellular function and maintenance
T cell differentiation	1.6e-07	Kinase activity	0.0093	Natural killer cell mediated cytotoxicity	6.4e-07	Natural killer cell signaling	11.495	CD3	Complex	3.81e-24	Metabolic disease	Cell death and survival
Positive regulation of T cell proliferation	2.4e-07	Carbohydrate binding	0.014	Cell adhesion molecules (CAMs)	5.8e-06	T cell receptor signaling	11.323	IL21	Cytokine	4.38e-23
Cell surface receptor signaling pathway	2.3e-06	Signal transducer activity	0.04	Intestinal immune network for IgA production	7.2e-06	PD-1, PD-L1 cancer immunotherapy pathway	10.054	IL12(Complex)	Complex	9.6e-23
Immune response	2e-05	Receptor activity	0.04	Leukocyte transendothelial migration	0.00089	Icos-iCOSL signaling in T helper cells	8.611	IL15	Cytokine	2.05e-21
B cell receptor signaling pathway	2e-05	Cell adhesion molecule binding	0.04	Chemokine signaling pathway	0.0011	Systemic lupus erythematosus in B cell signaling pathway	8.471	STAT6	Transcription regulator	8.44e-21
T cell activation	2e-05	SH3 domain binding	0.04	NF-kappa B signaling pathway	0.01	Leukocyte extravasation signaling	8.331	ID2	Transcription regulator	1.05e-20
Module 15						Module 15
Biological processes	FDR	Molecular functions	FDR	KEGG pathways	FDR	Canonical pathways	-log (p-value)	Upstream regulators	Molecule type	P-value of overlap	Diseases and disorders	Molecular and cellular functions
Inflammatory response	2.1e-06	Actin binding	0.012	Osteoclast differentiation	1.2e-05	TWEAK signaling	7.135	IFNG	Cytokine	1.77e-19	Inflammatory response	Cellular movement
Innate immune response	5.9e-05			Tuberculosis	1.5e-05	Induction of apoptosis by HIV1	6.967	Immunoglobulin	Complex	9.18e-18	Infectious diseases	Cellular function and maintenance
Positive regulation of phagocytosis	0.0003			Leishmaniasis	4.1e-05	Production of nitric oxide and reactive oxygen species in macrophages	6.703	TNF	Cytokine	6.25e-14	Endocrine system disorders	Cellular compromise
Immune system process	0.00061			Phagosome	5.1e-05	Neuroinflammation signaling pathway	6.438	TCL1A	Transcription regulator	2.44e-13	Gastrointestinal disease	Cell-to-cell signaling and interaction
Defense response to bacterium	0.0012			Lysosome	0.0002	Phagosome maturation	6.369	IL13	Cytokine	2.5e-12	Immunological disease	Cellular development
Response to lipopolysaccharide	0.0075			Legionellosis	0.025	TNFR1 signaling	6.224	CSF2	Cytokine	1.06e-11
Phagocytosis, engulfment	0.024			Apoptosis	0.025	TNFR2 signaling	5.393	IL4	Cytokine	4.5e-11
						Fcy-Receptor-mediated phagocytosis in macrophages and monocytes	5.86	CSF1	Cytokine	6.89e-11
						Death receptor signaling	5.779	USP22	Peptidase	1.82e-10
						Myc mediated apoptosis signaling	4.955	IL10	Cytokine	4.59e-10
Module 16						Module 16
Biological processes	FDR	Molecular functions	FDR	KEGG pathways	FDR	Canonical pathways	-log (p-value)	Upstream regulators	Molecule type	P-value of overlap	Diseases and disorders	Molecular and cellular functions
Protein folding	1.1e-10	Poly(A) RNA binding	9.9e-11	Protein processing in endoplasmic reticulum	2.4e-14	Unfolded protein response	10.003	XBP1	Transcription regulator	1.87e-28	Cancer	Post-translational modification
Response to endoplasmic reticulum stress	6.8e-07	Misfolded protein binding	2.3e-06		0.082	Aldosterone signaling in epithelial cells	7.447	ERN1	Kinase	3.03e-16	Organismal injury and abnormalities	Protein folding
mRNA processing	0.0025	Unfolded protein binding	3.9e-06			Protein ubiquitination pathway	4.535	CGA	Other	2.73e-11	Hereditary disorder	Cellular compromise
Chaperone-mediated protein folding	0.01	Chaperone binding	5.3e-05			NRF2-mediated oxidative stress response	3.369	FBX032	Enzyme	1.65e-09	Neurological disorder	Cellular function and maintenance
		Protein disulfide isomerase activity	0.00049			Insulin secretion signaling pathway	2.356	HNF4A	Transcription regulator	2.36e-08	Neurological disorder	RNA post-transcriptional modification
		RNA binding	0.0032			Cardiac hypertrophy signaling	1.788	ELL2	Transcription regulator	4.92e-08	Skeletal and muscular disorders
		Glycoprotein binding	0.0069					ATF6	Transcription regulator	9.88e-08
		Isomerase activity	0.034					Manf	Other	2e-07
		Double-stranded RNA binding	0.036					NFE2L2	Transcription regulator	7.03e-07
								THBS4	Other	9.9e-07
Module 17						Module 17
Biological processes	FDR	Molecular functions	FDR	KEGG pathways	FDR	Canonical pathways	-log (p-value)	Upstream regulators	Molecule type	P-value of overlap	Diseases and disorders	Molecular and cellular functions
Keratinocyte differentiation	3.3e-18	Structural molecule activity	2.4e-14	Calcium signaling pathway	0.0026	Calcium signaling	16.119	CA4	Enzyme	3.11e-12	Cancer	Cell morphology
Peptide cross-linking	1.8e-16	Calcium ion binding	2.4e-05	Oxytocin signaling pathway	0.0044	Dilated cardiomyopathy signaling pathway	12.103	SGPP1	Phosphatase	8.13e-11	Dermatological diseases and conditions	Cellular assembly and organization
Regulation of muscle contraction	2.1e-08	Actin binding	0.0013	Tight junction	0.033	Cellular effects of slidenafil (viagra)	9.427	MYOD1	Transcription regulator	1.55e-10	Organismal injury and abnormalities	Cellular development
Epidermis development	4e-08					nNOS signaling in skeletal muscle cells	8.261	PAX1	Transcription regulator	1.75e-10	Skeletal and muscular disorders	Cellular function and maintenance
Keratinization	2.4e-05					Agranulocyte adhesion and diapedesis	4.767	DMD	Other	3.01e-10	Gastrointestinal disease	Lipid metabolism
Skeletal muscle contraction	6.9e-05					Actin cytoskeleton signaling	4.348	GRB2	Other	6.71e-10
Muscle contraction	7.9e-05					Hepatic fibrosis signaling pathway	4.146	KRT14	Other	1.64e-09
Skeletal muscle fiber development	0.0022					Epithelial ahderens junction signaling	3.735	GATA4	Transcription regulator	2.62e-09
Lipid metabolic process	0.013					Protein kinase A signaling	3.575	SOX7	Transcription regulator	3.96e-09
Skeletal muscle tissue development	0.03					Dopamine-DARPP32 feedback in Camp signaling	3.417	GATA3	Transcription regulator	1.66e-08
Module 18						Module 18
Biological processes	FDR	Molecular functions	FDR	KEGG pathways	FDR	Canonical pathways	-log (p-value)	Upstream regulators	Molecule type	P-value of overlap	Diseases and disorders	Molecular and cellular functions
Immune system process	1.3e-13	Protein binding	0.00014	B cell receptor signaling pathway	3.6e-08	Th2 pathway	12.955	IFNG	Cytokine	1.38e-11	Immunological disease	Cellular function and maintenance
Immune response	9.6e-10	GTPase activator activity	0.0012	Natural killer cell mediated cytotoxicity	1.4e-05	Th1 and Th2 activation pathway	11.678	IL4	Cytokine	3.97e-11	Inflammatory response	Cellular development
Antigen processing and presentation of exogenous peptide antigen via MHC class II	2.7e-06	Phosphatidylinositol-3,4,5-trisphosphate binding	0.0061	Chemokine signaling pathway	3e-05	Leukocyte extravasation signaling	11.04	CD3	Complex	2.94e-10	Organismal injury and abnormalities	Cellular growth and proliferation
Chemotaxis	4.2e-06	Cytokine receptor activity	0.0064	Osteoclast differentiation	3.2e-05	Th1 pathway	10.78	KDM1A	Enzyme	3.69e-10	Hematological disease	Cellular movement
Peptidyl-tyrosine phosphorylation	1e-05	Non-membrane spanning protein tyrosine kinase activity	0.0064	Inflammatory bowel disease (IBD)	0.00021	Systemic Lupus Erythematosus in B cell signaling pathway	10.183	Immunoglobulin	Complex	4.67e-10	Connective tissue disorders	Cell morphology
Regulation of cell shape	1e-05	Actin binding	0.0066	Leishmaniasis	0.00028	B cell receptor signaling	9.79	IL10	Cytokine	1.04e-09
Adaptive immune response	1e-05	SH3 domain binding	0.019	Fc epsilon RI signaling pathway	0.00033	Neuroinflammation signaling pathway	9.449	IL33	Cytokine	2.15e-09
Innate immune response	3.7e-05	Protein tyrosine kinase activity	0.019	Intestinal immune network for IgA production	0.00033	Role of JAK1 and JAK3 in yc Cytokine signaling	8.851	IL15	Cytokine	5.23e-09
Intracellular signal transduction	0.00022			Tuberculosis	0.0015	Natural killer cell signaling	8.496	DYSF	Other	5.65e-09
Inflammatory response	0.0003			T cell receptor signaling pathway	0.0021	GP6 signaling pathway	7.975	EIF4E	Translation regulator	7.17e-09
Module 19						Module 19
Biological processes	FDR	Molecular functions	FDR	KEGG pathways	FDR	Canonical pathways	-log (p-value)	Upstream regulators	Molecule type	P-value of overlap	Diseases and disorders	Molecular and cellular functions
Oxidation-reduction process	7.9e-23	Oxidoreductase activity	2e-16	Carbon metabolism	1.3e-27	Mitochondrial dysfunction	28.061	CLPP	Peptidase	1.46e-55	Metabolic disease	Small molecule biochemistry
Tricarboxylic acid cycle	2.5e-22	Catalytic activity	7.2e-13	Metabolic pathways	6.6e-27	Sirtuin signaling pathway	27.996	ATP5IF1	Other	1.8e-31	Organismal injury and abnormalities	Lipid metabolism
Metabolic process	2e-13	Electron carrier activity	3.8e-11	Biosynthesis of antibiotics	3.8e-22	Oxidative phosphorylation	24.024	SMYD1	Transcription regulator	3.97e-31	Developmental disorder	Nucleic acid metabolism
Fatty acid metabolic process	1.3e-12	NADH dehydrogenase activity	3.1e-09	Citrate cycle (TCA cycle)	1.8e-19	TCA cycle II	21.69	INSR	Kinase	5.39e-30	Hereditary disorder	Energy production
Fatty acid beta-oxidation	4e-12	NAD binding	4.1e-08	Parkinson's disease	4.2e-18	Estrogen receptor signaling	14.275	TLE3	Other	2.24e-28	Gastrointestinal disease	Carbohydrate metabolism
Lipid metabolic process	6.7e-08	NADH dehydrogenase (ubiquinone) activity	4.1e-08	Propanoate metabolism	6.4e-17	Isoleucine degradation I	9.903	RYR1	Ion channel	5.59e-24
Transport	2.8e-07	4 iron, 4 sulfur cluster binding	9.5e-08	Huntington's disease	1.2e-15	Glucocorticoid receptor signaling	9.489	MAP4K4	Kinase	1.06e-23
Fatty acid beta-oxidation using acyl-CoA dehydrogenase	2.8e-06	Iron-sulfur cluster binding	9.9e-08	Oxidative phosphorylation	1.2e-13	Valine degradation I	9.412	ESRRG	Ligand-dependent nuclear receptor	1.97e-21
Succinate metabolic process	8.3e-06	Oxidoreductase activity, acting on NAD(P)H	1.1e-07	Alzheimer's disease	4.3e-13	Fatty Acid B-oxidation I	7.896	PPARGC1A	Transcription regulator	3.94e-20
NADH metabolic process	1.7e-05	Fatty-acyl-CoA binding	1e-06	Non-alcoholic fatty liver disease (NAFLD)	1.6e-10	Glutaryl-CoA degradation	7.866	CPT1B	Enzyme	4.93e-20
Module 20						Module 20
Biological processes	FDR	Molecular functions	FDR	KEGG pathways	FDR	Canonical pathways	-log (p-value)	Upstream regulators	Molecule type	P-value of overlap	Diseases and disorders	Molecular and cellular functions
Immune system process	2.7e-32	RNA binding	2.2e-06	Herpes simplex infection	2.2e-16	Interferon signaling	19.453	IRF7	Transcription regulator	9.62e-84	Antimicrobial response	Cell signaling
Defense response to virus	7.5e-27	Double-stranded RNA binding	1.2e-05	Influenza A	3.9e-09	Role of hypercytokinemia/hyperchemokinemia in the pathogenesis of Influenza	16.093	STAT1	Transcription regulator	2.69e-70	Inflammatory response	Cellular function and maintenance
Response to virus	3.7e-20	Peptide antigen binding	0.00033	Antigen processing and presentation	9.6e-08	Antigen presentation pathway	13.045	Interferon alpha	Group	2.79e-68	Immunological disease	Cellular development
Innate immune response	4.6e-20	Protein binding	0.001	Measles	4.7e-07	Activation of IRF by cytosolic pattern recognition receptors Th1 pathway	12.55	Ifnar	Group	1.59e-65	Infectious diseases	Cellular growth and proliferation
Cellular response to interferon-beta	2.9e-14	Nucleotide binding	0.0037	Hepatitis C	4.9e-06	Th1 pathway	8.417	IRF3	Transcription regulator	1.54e-60	Endocrine system disorders	Cell morphology
Negative regulation of viral genome replication	6.7e-10	GTPase activity	0.0038	Allograft rejection	0.00044	Systemic Lupus erythematosus in B cell signaling pathway	8.408	TRIM24	Transcription regulator	5.19e-60
Defense response to protozoan	1.1e-06	GTP binding	0.027	Jak-STAT signaling pathway	0.00059	Th1 and Th2 activation pathway	8.293	IFNG	Cytokine	4.23e-58
Antigen processing and presentation of exogenous peptide antigen via MHC class I, TAP-dependent	1.1e-06	ATP binding	0.031	Toxoplasmosis	0.0007	Coronavirus pathogenesis pathway	7.606	IFNA2	Cytokine	3.91e-53
Response to interferon-alpha	3.2e-05			Viral carcinogenesis	0.0014	Protein ubiquitination pathway	7.387	IRF1	Transcription regulator	1.69e-52
Immune response	0.00099			Proteasome	0.0017	Role of JAK1, JAK2, and TYK2 in interferon signaling	7.017	Irgm1	Other	1.14e-49
Module 21						Module 21
Biological processes	FDR	Molecular functions	FDR	KEGG pathways	FDR	Canonical pathways	-log (p-value)	Upstream regulators	Molecule type	P-value of overlap	Diseases and disorders	Molecular and cellular functions
Immune response	0.0054	Cytokine activity	0.0045	Cytokine-cytokine receptor interaction	0.013	IL-17 signaling	5.37	IL4R	Transmembrane receptor	7.97e-15	Gastrointestinal disease	Lipid metabolism
						Th2 Pathway	4.812	IL9	Cytokine	3.77e-12	Inflammatory response	Small molecule biochemistry
						Th1 and Th2 activation pathway	4.339	FOXA2	Transcription regulator	1.24e-11	Hematological disease	Cellular movement
						Granulocyte adhesion and diapedesis	4.145	IL13	Cytokine	2.82e-11	Immunological disease	Cell-to-cell signaling and interaction
						Cardiac hypertrophy signalingh	2.857	CD69	Transmembrane receptor	8.37e-11	Inflammatory response	Cell morphology
						Glucocorticoid receptor signaling	2.688	IL22	Cytokine	1.39e-09
								IL33	Cytokine	1.81e-09
								CD48	Other	3.77e-09
								GLI2	Transcription regulator	7.31e-09
								IL25	Cytokine	9.01e-09
Module 22						Module 22
Biological processes	FDR	Molecular functions	FDR	KEGG pathways	FDR	Canonical pathways	-log (p-value)	Upstream regulators	Molecule type	P-value of overlap	Diseases and disorders	Molecular and cellular functions
Rhythmic process	2.1e-08	Protein binding	0.00012	Circadian rhythm	3.9e-06	Circadian rhythm signaling	7.975	CLOCK	Transcription regulator	6.06e-13	Neurological disease	Lipid metabolism
Circadian regulation of gene expression	2.8e-06					Breast cancer regulation by stathmin 1	1.983	PER2	Transcription regulator	1.63e-10	Organismal injury and abnormalities	Small molecule Biochemistry
Circadian rhythm	5.8e-05						3.775	PER1	Transcription regulator	1.09e-09	Hereditary disorder	Gene expression
Regulation of circadian rhythm	0.0011						3.62	ARNTL	Transcription regulator	1.14e-08	Psychological disorders	Cell-to-cell signaling and interaction
Transcription, DNA-templated	0.026						2.467	NPAS2	Transcription regulator	4.1e-07	Skeletal and muscular disorders	Molecular transport
							1.754	HTT	Transcription regulator	6.03e-07
								CRY2	Enzyme	3.32e-06
								CRY1	Enzyme	3.32e-06
								BCO2	Enzyme	0.000235
								BCO1	Enzyme	0.000406
Module 23						Module 23
Biological processes	FDR	Molecular functions	FDR	KEGG pathways	FDR	Canonical pathways	-log (p-value)	Upstream regulators	Molecule type	P-value of overlap	Diseases and disorders	Molecular and cellular functions
Cholesterol efflux	1.8e-06	Monooxygenase activity	8.3e-07	Complement and coagulation cascades	0.00027	FXR/RXR Activation	23.038	ADIPOQ	Other	1.06e-22	Inflammatory response	Lipid metabolism
Lipid transport	3.9e-05	Aromatase activity	1.5e-06	Steroid hormone biosynthesis	0.00027	LXR/RXR Activation	19.203	HNF1A	Transcription regulator	3.68e-19	Organismal injury and abnormalities	Small moleculare Biochemistry
Lipoprotein metabolic process	7.5e-05	Iron ion binding	1.5e-06	Metabolic pathways	0.002	Acute phase response signaling	16.833	PPARA	Ligand-dependent nuclear receptor	1.85e-16	Infectious diseases	Vitamin and mineral metabolism
Triglyceride metabolic process	0.00013	Phospholipid binding	2e-06	PPAR signaling pathway	0.002	Maturity Onset Diabetes of Young MODY signaling	11.738	Tcf/1/3/4	Group	1.23e-13	Gastrointestinal disease	Molecular transport
Oxidation-reduction process	0.00014	Oxidoreductase activity, acting on paired donors, with incorporation or reduction of molecular oxygen	3.3e-06	Retinol metabolism	0.0024	LPS/IL-1 Mediated inhibiton of RXR function	9.027	FOXA2	Transcription regulator	8.27e-13	Hepatic system disease	Cellular compromise
Negative regulation of peptidase activity	0.00026	Heme binding	3.9e-06			Coagulation system	8.216	NR1H4	Ligand-dependent nuclear receptor	4.21e-12
Cholesterol homeostasis	0.00038	Oxidoreductase activity	2.3e-05			Oxidative ethanol degradation III	7.199	LEP	Growth factor	4.29e-12
Blood coagulation	0.00097	Oxidoreductase activity, acting on paired donors, with incorporation or reduction of molecular oxygen, reduced flavin or flavoprotein as one donor, and incorporation of one atom of oxygen	4.9e-05			Clathrin-mediated endocytosis signaling	7.133	HNF4A	Transcription regulator	6.37e-12
		Arachidonic acid epoxygenase activity	6.2e-05			PXR/RXR Activation	6.83	ACOX1	Enzyme	7.27e-12
		Steroid hydroxylase activity	9.9e-05			Atherosclerosis signaling	6.783	Hmgn3	Other	2.47e-11

## Sheet: 11b. Groups of modules
Table S11. Enrichment analysis for the top 10 biological functions for each module.
Table S11b. Modules were grouped with similar biological functions according to IPA canonical pathways.
Module 2		Module 13
Canonical pathways		Canonical pathways
Apoptosis signaling		p53 signaling
Death receptor signaling		Myc mediated apoptosis signaling
ATM signaling		PI3K/AKT signaling
Senescence pathway		Apoptosis signaling
Pyridoxal 5'phosphate salvage pathway		Aryl Hydrocarbon receptor signaling
Autophagy		Chronic myeloid leukemia signaling
Protein Ubiquitination Pathway		Molecular mechanisms of cancer
Telomere extension by Telomerase		Prostate cancer signaling
NGF signaling		Glioma signaling
PPARa/RXRa activation
Module 5		Module 6
Canonical pathways		Canonical pathways
tRNA charging		Kinetochore metaphase signaling pathway
Sirtuin signaling pathway		Cell cycle control of chromosomal replication
DNA double-strand break repair by non-homologous end joining		Role of BRCA1 in DNA damage response
Telomere extension by telomerase		Cell cycle: G2/M DNA damage checkpoint regulation
Huntington's disease signaling		Estrogen-mediated S-phase entry
Hypoxia signaling in the cardiovascular system		Mitotic roles of polo-like kinase
FAT10 signaling pathway		Cyclins and cell cycle regulation
Protein Ubiquitination pathway		Role of CHK proteins in cell cycle checkpoint
Ferroptosis signaling pathway		Nucleotide excision repair, enhanced pathway
Inhibition of ARE-mediated mRNA degradation pathway		Hereditary breast cancer signaling
Module 7		Module 19
Canonical pathways		Canonical pathways
Mitochondrial dysfunction		Mitochondrial dysfunction
Oxidative phosphorylation		Sirtuin signaling pathway
Sirtuin signaling pathway		Oxidative phosphorylation
Estrogen receptor signaling		TCA cycle II
Glucocorticoid receptor signaling		Estrogen receptor signaling
EIF2 signaling		Isoleucine degradation I
Coronavirus pathogenesis pathway		Glucocorticoid receptor signaling
Regulation of eIF4 and p7056K signaling		Valine degradation I
mTOR		Fatty Acid B-oxidation I
Nucleotide excision repair, enhance pathway		Glutaryl-CoA degradation
Module 8		Module 16
Canonical pathways		Canonical pathways
Glutathione-mediated detoxification		Unfolded protein response
Aldosterone signaling in epithelial cells		Aldosterone signaling in epithelial cells
NRF2-mediated oxidative stress response		Protein ubiquitination pathway
Ovarian cancer signaling		NRF2-mediated oxidative stress response
Aryl Hydrocarbon receptor signaling		Insulin secretion signaling pathway
Role of NANOG in mammalian embryonic stem cell pluripotency		Cardiac hypertrophy signaling
Xenobiotic metabolism PXR signaling pathway
LPS/IL-1 mediated inhibition of RXR function
Human embryonic stemm cell pluripotency
Module 9		Module 10		Module 20		Module 11		Module 14		Module 18		Module 21		Module 15
Canonical pathways		Canonical pathways		Canonical pathways		Canonical pathways		Canonical pathways		Canonical pathways		Canonical pathways		Canonical pathways
Phagosome maturation		Granulocyte adhesion and diapedesis		Interferon signaling		Acute phase response signaling		Th1 and Th2 activation pathway		Th2 pathway		IL-17 signaling		TWEAK signaling
Role of MAPK signaling in promoting the pathogenesis of influenza		Agranulocyte adhesion and diapedesis		Role of hypercytokinemia/hyperchemokinemia in the pathogenesis of Influenza		Tumor microenvironment pathway		Th1 pathway		Th1 and Th2 activation pathway		Th2 Pathway		Induction of apoptosis by HIV1
Phagosome formation		Acute phase response signaling		Antigen presentation pathway		IL-6 signaling		Th2 pathway		Leukocyte extravasation signaling		Th1 and Th2 activation pathway		Production of nitric oxide and reactive oxygen species in macrophages
Iron homeostasis signaling pathway		IL-10 signaling		Activation of IRF by cytosolic pattern recognition receptors Th1 pathway		JAK/Stat signaling		Primary immunodeficiency signaling		Th1 pathway		Granulocyte adhesion and diapedesis		Neuroinflammation signaling pathway
Granulocyte adhesion and diapedesis		IL-17 signaling		Th1 pathway		TNFR2 signaling		Natural killer cell signaling		Systemic Lupus Erythematosus in B cell signaling pathway		Cardiac hypertrophy signalingh		Phagosome maturation
Role of pattern recognition receptors in recognition of bacteria and viruses		LXR/RXR activation		Systemic Lupus erythematosus in B cell signaling pathway		CD40 signaling		T cell receptor signaling		B cell receptor signaling		Glucocorticoid receptor signaling		TNFR1 signaling
Colorectal cancer metastasis signaling		Role of macrophages, fibroblasts and endothelial cells in rheumatoid arthritis		Th1 and Th2 activation pathway		Coronavirus pathogenesis pathway		PD-1, PD-L1 cancer immunotherapy pathway		Neuroinflammation signaling pathway				TNFR2 signaling
Tumor microenvironment pathway		Hepatic cholestasis		Coronavirus pathogenesis pathway		Hepatic fibrosis signalingh pathway		Icos-iCOSL signaling in T helper cells		Role of JAK1 and JAK3 in yc Cytokine signaling				Fcy-Receptor-mediated phagocytosis in macrophages and monocytes
Osteoarthritis pathway		IL-6 signaling		Protein ubiquitination pathway		IL-10 signaling		Systemic lupus erythematosus in B cell signaling pathway		Natural killer cell signaling				Death receptor signaling
Eicosanoid signaling		Role of osteoblasts, osteoclasts, and chondrocytes in rheumatoid arthritis		Role of JAK1, JAK2, and TYK2 in interferon signaling		Death receptor signaling		Leukocyte extravasation signaling		GP6 signaling pathway				Myc mediated apoptosis signaling
Module 23
Canonical pathways
FXR/RXR Activation
LXR/RXR Activation
Acute phase response signaling
Maturity Onset Diabetes of Young MODY signaling
LPS/IL-1 Mediated inhibiton of RXR function
Coagulation system
Oxidative ethanol degradation III
Clathrin-mediated endocytosis signaling
PXR/RXR Activation
Atherosclerosis signaling
Module 4		Module 22		Module 17		Module 12
Canonical pathways		Canonical pathways		Canonical pathways		Canonical pathways
CREB signaling pathway		Circadian rhythm signaling		Calcium signaling		Dilated cardiomyopathy signaling pathway
Breast cancer regulation by stathmin1		Breast cancer regulation by stathmin 1		Dilated cardiomyopathy signaling pathway		Calcium signaling
Calcium signaling				Cellular effects of slidenafil (viagra)		Epithelial adherens junction signaling
GABA receptor signaling				nNOS signaling in skeletal muscle cells		Actin cytoskeleton signaling
Amyotrophic lateral sclerosis signaling				Agranulocyte adhesion and diapedesis		Apelin cardiomyocyte signaling pathway
cAMP-mediated signaling				Actin cytoskeleton signaling		ILK signaling
Glutamate receptor signaling				Hepatic fibrosis signaling pathway		Hepatic fibrosis/hepatic stellate cell activation
Phototransduction pathway				Epithelial ahderens junction signaling		Protein Kinase A signaling
Serotonin receptor signaling				Protein kinase A signaling		Agranulocyte adhesion and diapedesis
Synaptogenesis signaling pathway				Dopamine-DARPP32 feedback in Camp signaling		PAK signaling
Module 1		Module 3
Canonical pathways		Canonical pathways
Cardiac hypertrophy signaling		FAT10 signaling pathway
Axonal guidance signaling		Polyamine regulation in colon cancer
Hepatic fibrosis signaling pathway		BAG2 signaling pathway
Molecular mechanisms of cancer		Inhibiton of ARE-mediated mRNA degradation pathway
RAR activation		Huntington's disease signaling
Thrombin signaling		Nucleotide excision repair (Enhanced pathway)
Human embryonic stem cell pluripotency		Protein Ubiquitination Pathway
HER-2 signaling in breast cancer		Assembly of RNA polymerase II complex
Factors promoting cardiogenesis in vertebrates		Nucleotide excision repair pathway
Gap junction signaling		Spliceosomal cycle
