# Supplementary material for: Single-Walled vs. Multi-Walled Carbon Nanotubes: Influence of Physico-Chemical Properties on Toxicogenomics Responses in Mouse Lungs
Source: Nanomaterials (Basel). 2023 Mar 15;13(6):1059. doi: 10.3390/nano13061059 (PMC10057402; doi:10.3390/nano13061059)
Supplement: Supplementary file 1 [file nanomaterials-13-01059-s001.zip › Table S12.xlsx]

## Sheet: BMC Summary CNT
Table S12. BMD Analysis.
Chemical	HighDose	NumGenes	MedianBMD	MedianBMDL	Gene25	Gene25.BMD	Gene25.BMDL	Gene25.BMDU	MengerCurv	Knee	firstMode	JO	LCRD	LCRD.2	LCRD.2.N	Reactome
BestModels_dataForBMDExpress NRCWE-51 P2_williams_0.05_NOMTC_foldfilter1.5_BMD.txt	54	505	6.65298	4.44223	Cxcl3	4.7728e-08	4.7728e-08	4.78054e-08	1.9535	9.44088e-13	5.62743	5.62743	1.05699e-12	0.676027	52	6.71486e-05
BestModels_dataForBMDExpress NRCWE-61 P1_williams_0.05_NOMTC_foldfilter1.5_BMD.txt	54	324	20.9654	14.4062	Cox7a2l	5.12023	1.87496	12.3697	3.2484	2.4543	8.10005	8.10005	2.39668	2.39668	2	4.56976
BestModels_dataForBMDExpress NRCWE-54 P2_williams_0.05_NOMTC_foldfilter1.5_BMD.txt	54	310	9.14079	5.78293	Tfrc	5.54365	3.94161	9.14943	4.43548	4.78213	7.87331	7.87331	3.19995	3.19995	2	5.55265
BestModels_dataForBMDExpress NRCWE-62 P2_williams_0.05_NOMTC_foldfilter1.5_BMD.txt	54	339	18.1346	13.3031	Ly6f	6.74317	4.19313	11.5712	5.34804	4.38488	9.37481	9.37481	4.17873	4.17873	3	6.42424
BestModels_dataForBMDExpress NRCWE-52 P2_williams_0.05_NOMTC_foldfilter1.5_BMD.txt	54	286	20.6622	14.9992	Aldh1a3	7.32347	2.56247	17.5397	6.23641	5.06501	8.91021	8.91021	4.67759	4.67759	2	7.32347
BestModels_dataForBMDExpress NRCWE-055 P1_williams_0.05_NOMTC_foldfilter1.5_BMD.txt	54	325	24.4286	17.1693	Emilin1	7.38614	4.84446	15.3769	6.00237	4.07685	8.40595	8.40595	3.05427	3.05427	5	9.89605
BestModels_dataForBMDExpress NRCWE-53 P2_williams_0.05_NOMTC_foldfilter1.5_BMD.txt	54	229	23.7896	17.1331	AA467197	9.00373	1.97946	25.5568	8.46944	4.95094	21.1794	21.1794	4.14595	4.14595	3	7.60139
BestModels_dataForBMDExpress NRCWE-056 P1_williams_0.05_NOMTC_foldfilter1.5_BMD.txt	54	231	26.7388	18.8024	Tnfrsf9	9.31904	5.93274	19.5429	8.58473	6.58115	10.5221	10.5221	4.74618	4.74618	5	19.0221
BestModels_dataForBMDExpress NRCWE-057 P1_williams_0.05_NOMTC_foldfilter1.5_BMD.txt	54	306	23.4572	16.9791	Fabp1	9.84301	4.03181	31.0349	8.79563	4.50233	22.0587	22.0587	4.50233	4.50233	3	15.1796
BestModels_dataForBMDExpress NRCWE-63 P2_williams_0.05_NOMTC_foldfilter1.5_BMD.txt	54	168	22.9386	17.0399	Avpr1a	10.3338	6.21639	57.0081	7.38506	5.96889	20.917	20.917	5.96889	5.96889	3	11.0219
BestModels_dataForBMDExpress NRCWE-64 P2_williams_0.05_NOMTC_foldfilter1.5_BMD.txt	54	144	24.1589	16.8546	Cxcl5	11.7698	9.09156	16.3321	7.78241	6.734	16.112	16.112	6.01792	6.01792	2	13.2557
BestModels_dataForBMDExpress NM411 P1_williams_0.05_NOMTC_foldfilter1.5_BMD.txt	54	74	32.9597	22.2875	Sdf2l1	25.9875	18.1731	45.0464	7.63468	8.86322	9.5602	9.5602	6.16291	6.16291	3	26.6748
Units: μg/mouse
BMD: Benchmark Dose
BMDL: Benchmark dose (lower confidence limit)
LCRD: Lowest consistent response dose
